# Supplementary material for: Causal associations between common musculoskeletal disorders and dementia: a Mendelian randomization study
Source: Front Aging Neurosci. 2023 Dec 6;15:1253791. doi: 10.3389/fnagi.2023.1253791 (PMC10731015; doi:10.3389/fnagi.2023.1253791)
Supplement: Supplementary file 1 [file Table_1.XLSX]

## Sheet: Supplementary Table S1
Supplementary Table S1: The information of the GWAS summary data.
Trait	Case	Controls	Sample Size	Year	Sex	Websource	Population
Dementia	13517	325306	338823	2022	Male and Female	www.finngen.fi/en	European
Dementia in Alzheimer disease	4406	325306	329712	2022	Male and Female	www.finngen.fi/en	European
Unspecified dementia	3240	325306	328546	2022	Male and Female	www.finngen.fi/en	European
Vascular dementia	2048	328982	331030	2022	Male and Female	www.finngen.fi/en	European
Frontotemporal dementia, wide, incl. Pick's disease	118	328323	328441	2022	Male and Female	www.finngen.fi/en	European
Demnetia with Lewy bodies	2591	4027	6618	2021	Male and Female	doi:10.1038/s41588-021-00785-3	European
All Osteoarthritis	177517	649173	826690	2021	Male and Female	doi: 10.1016/j.cell.2021.11.003	European
KneeHip Osteoarthritis	89741	400604	490345	2021	Male and Female	doi: 10.1016/j.cell.2021.11.004	European
Knee Osteoarthritis	62497	333557	396054	2021	Male and Female	doi: 10.1016/j.cell.2021.11.005	European
Hip Osteoarthritis	36445	316943	353388	2021	Male and Female	doi: 10.1016/j.cell.2021.11.006	European
Spine Osteoarthritis	28372	305578	333950	2021	Male and Female	doi: 10.1016/j.cell.2021.11.007	European
Osteonecrosis	257	456091	456348	2021	Male and Female	doi: 10.1038/s41588-021-00954-4	European
Sciatica	1502	454846	456348	2021	Male and Female	doi: 10.1038/s41588-021-00954-4	European
Ankylosing spondylitis	186	456162	456348	2022	Male and Female	doi: 10.1038/s41588-021-00954-4	European
Osteoporosis	991	455357	456348	2021	Male and Female	doi: 10.1038/s41588-021-00954-4	European
Osteomalacia	106	456242	456348	2021	Male and Female	doi: 10.1038/s41588-021-00954-5	European
Rheumatoid arthritis	1961	454387	456348	2021	Male and Female	doi: 10.1038/s41588-021-00954-4	European
Gout	2115	67259	69374	2013	Male and Female	doi:10.1038/ng.2500	European
Osteomyelitis	4836	481648	486484	2021	Male and Female	https://gwas.mrcieu.ac.uk/ (ID: ieu-b-4975)	European
Usual walking pace	NA	NA	459915	2018	Male and Female	https://gwas.mrcieu.ac.uk/ (ID: ukb-b-4711)	European
Physical activity	NA	NA	89683	2018	Male and Female	https://gwas.mrcieu.ac.uk/ (ID: ebi-a-GCST90093322)	European
Hand grip strength (left)	NA	NA	461026	2018	Male and Female	https://gwas.mrcieu.ac.uk/ (ID: ukb-b-7478)	European
Hand grip strength (right)	NA	NA	461089	2018	Male and Female	https://gwas.mrcieu.ac.uk/ (ID: ukb-b-10215)	European
Fracture	53184	373611	426795	2019	Male and Female	doi：10.1038/s41588-018-0302-x	European
Muscle wasting and atrophy	141	253122	253263	2022	Male and Female	www.finngen.fi/en	European
Seronegative rheumatoid arthritis	3465	261098	264563	2022	Male and Female	www.finngen.fi/en	European
Seropositive rheumatoid arthritis	8275	334220	342495	2022	Male and Female	www.finngen.fi/en	European
Juvenile idiopathic arthritis	1348	261098	262446	2022	Male and Female	www.finngen.fi/en	European
Meniscus derangement	21757	221323	243080	2022	Male and Female	www.finngen.fi/en	European
Lateral epicondylitis	3765	253122	256887	2022	Male and Female	www.finngen.fi/en	European
Cervical disc disorders	11981	248831	260812	2022	Male and Female	www.finngen.fi/en	European
