# Supplementary material for: Causal associations between common musculoskeletal disorders and dementia: a Mendelian randomization study
Source: Front Aging Neurosci. 2023 Dec 6;15:1253791. doi: 10.3389/fnagi.2023.1253791 (PMC10731015; doi:10.3389/fnagi.2023.1253791)
Supplement: Supplementary file 2 [file Table_2.XLSX]

## Sheet: Supplementary Table S2
Supplementary Table S2: The F value of SNPs in MR analyses.
Exposure	SNP	Effect allele	Other allele	Exposure			R2	F
				Beta	SE	P-value
All Osteoarthritis	rs2622873	T	C	0.0458	0.00694412	4.238e-11	0.000449382	371.665
All Osteoarthritis	rs471464	A	C	0.031	0.00557162	2.638e-08	0.000453556	375.12
All Osteoarthritis	rs2820444	A	G	0.028	0.00492803	1.333e-08	0.00033059	273.385
All Osteoarthritis	rs1149620	A	T	-0.0264	0.00471994	2.228e-08	0.000343293	283.894
All Osteoarthritis	rs10831476	A	C	0.0334	0.00578507	7.765e-09	0.0003424	283.155
All Osteoarthritis	rs12901372	C	G	0.0303	0.00468732	1.018e-10	0.000457314	378.229
All Osteoarthritis	rs55872725	T	C	0.0256	0.00459312	2.496e-08	0.000317298	262.39
All Osteoarthritis	rs8055162	A	G	-0.0301	0.00537364	2.126e-08	0.000445326	368.309
All Osteoarthritis	rs216175	A	C	0.0423	0.00605098	2.737e-12	0.000510116	421.922
All Osteoarthritis	rs1401795	A	G	0.0266	0.00457714	6.192e-09	0.00035378	292.569
All Osteoarthritis	rs10405617	A	G	0.0316	0.00487842	9.325e-11	0.000434141	359.055
All Osteoarthritis	rs75621460	A	G	0.0963	0.0157882	1.064e-09	0.000462658	382.651
All Osteoarthritis	rs4671010	A	C	0.0258	0.00452788	1.212e-08	0.00033282	275.23
All Osteoarthritis	rs858936	T	C	-0.0378	0.00692658	4.836e-08	0.000310842	257.05
All Osteoarthritis	rs3771501	A	G	0.0357	0.00454578	4.048e-15	0.000634619	524.965
All Osteoarthritis	rs62182810	A	G	0.027	0.00458257	3.818e-09	0.000361664	299.092
All Osteoarthritis	rs2425061	A	G	0.0329	0.0046832	2.139e-12	0.000505737	418.298
All Osteoarthritis	rs62242105	A	G	-0.0289	0.00486894	2.928e-09	0.000370009	305.995
All Osteoarthritis	rs62262106	A	G	-0.0296	0.00528009	2.071e-08	0.000326977	270.397
All Osteoarthritis	rs11731421	A	G	0.0306	0.00480283	1.875e-10	0.000423593	350.328
All Osteoarthritis	rs1913707	A	G	0.0328	0.0046296	1.392e-12	0.000513652	424.849
All Osteoarthritis	rs11726937	A	G	-0.0313	0.00529855	3.478e-09	0.000362036	299.399
All Osteoarthritis	rs17677555	C	G	0.0299	0.00523283	1.104e-08	0.000339328	280.614
All Osteoarthritis	rs11749736	T	C	-0.0293	0.00517577	1.505e-08	0.000329438	272.432
All Osteoarthritis	rs2856821	T	C	0.0321	0.00586052	4.318e-08	0.000343797	284.311
All Osteoarthritis	rs4714791	T	G	-0.0252	0.00457357	3.59e-08	0.000316955	262.106
All Osteoarthritis	rs9445214	T	G	-0.025	0.004556	4.082e-08	0.000311314	257.44
All Osteoarthritis	rs476330	T	C	0.0251	0.00458885	4.506e-08	0.000307804	254.536
All Osteoarthritis	rs10953758	A	G	0.0274	0.00453813	1.563e-09	0.000374785	309.947
KneeHip Osteoarthritis	rs12724172	T	G	-0.0444	0.00796729	2.507e-08	0.00098568	483.798
KneeHip Osteoarthritis	rs2622873	T	C	0.0557	0.00932219	2.301e-09	0.000660426	324.049
KneeHip Osteoarthritis	rs1046934	A	C	0.0352	0.00634768	2.934e-08	0.000563017	276.227
KneeHip Osteoarthritis	rs2605110	T	C	-0.0505	0.00647295	6.108e-15	0.00111243	546.079
KneeHip Osteoarthritis	rs1907328	T	C	0.0348	0.00637668	4.832e-08	0.000552467	271.048
KneeHip Osteoarthritis	rs1517572	A	C	0.0382	0.00619027	6.787e-10	0.000707834	347.327
KneeHip Osteoarthritis	rs1631174	A	C	0.0388	0.00670772	7.278e-09	0.000675834	331.615
KneeHip Osteoarthritis	rs1149620	A	T	-0.038	0.00639822	2.865e-09	0.000711844	349.297
KneeHip Osteoarthritis	rs10831476	A	C	0.0446	0.00777152	9.529e-09	0.000609793	299.19
KneeHip Osteoarthritis	rs10842226	A	G	0.0416	0.00667797	4.681e-10	0.000843073	413.744
KneeHip Osteoarthritis	rs10843013	A	C	-0.0477	0.00743729	1.421e-10	0.00075705	371.495
KneeHip Osteoarthritis	rs4760621	A	G	0.0457	0.00822363	2.742e-08	0.000587992	288.488
KneeHip Osteoarthritis	rs7953280	C	G	0.0422	0.00610679	4.835e-12	0.000890411	436.996
KneeHip Osteoarthritis	rs1426371	A	G	-0.0408	0.0071815	1.337e-08	0.000651577	319.704
KneeHip Osteoarthritis	rs7953894	A	C	0.0341	0.00619642	3.73e-08	0.00058107	285.089
KneeHip Osteoarthritis	rs58973023	A	T	0.0414	0.00741605	2.371e-08	0.000856558	420.367
KneeHip Osteoarthritis	rs4380013	A	G	0.0478	0.00786884	1.243e-09	0.000696733	341.876
KneeHip Osteoarthritis	rs12901372	C	G	0.0458	0.00636254	6.093e-13	0.00104578	513.33
KneeHip Osteoarthritis	rs9940278	T	C	0.0537	0.00610701	1.454e-18	0.00141733	695.963
KneeHip Osteoarthritis	rs12922868	T	C	0.0492	0.00882674	2.49e-08	0.00060363	296.165
KneeHip Osteoarthritis	rs227744	A	G	-0.0486	0.0086978	2.302e-08	0.000934334	458.572
KneeHip Osteoarthritis	rs1467246	T	C	-0.0401	0.00607231	4.009e-11	0.000803756	394.433
KneeHip Osteoarthritis	rs2521349	A	G	0.0352	0.00620772	1.425e-08	0.000590132	289.538
KneeHip Osteoarthritis	rs74676797	A	G	0.0498	0.00805744	6.385e-10	0.000737174	361.735
KneeHip Osteoarthritis	rs7581446	T	C	-0.0485	0.00737669	4.873e-11	0.00117477	576.715
KneeHip Osteoarthritis	rs3755381	T	C	0.0442	0.0060983	4.232e-13	0.000972718	477.43
KneeHip Osteoarthritis	rs143384	A	G	0.0577	0.00619571	1.244e-20	0.00160792	789.701
KneeHip Osteoarthritis	rs9981884	A	G	-0.0336	0.00607981	3.267e-08	0.000563613	276.519
KneeHip Osteoarthritis	rs7640898	A	G	-0.0392	0.00703181	2.48e-08	0.000577008	283.095
KneeHip Osteoarthritis	rs59163323	A	G	-0.0562	0.00805004	2.924e-12	0.00101108	496.278
KneeHip Osteoarthritis	rs1913707	A	G	0.0419	0.00620582	1.461e-11	0.000837228	410.873
KneeHip Osteoarthritis	rs17615906	T	C	-0.0543	0.00821066	3.757e-11	0.000797757	391.487
KneeHip Osteoarthritis	rs3884606	A	G	-0.0374	0.00610414	8.956e-10	0.000697913	342.456
KneeHip Osteoarthritis	rs2856821	T	C	0.0461	0.00791395	5.706e-09	0.00070613	346.491
KneeHip Osteoarthritis	rs9472367	T	C	0.0404	0.0069264	5.452e-09	0.000631642	309.917
KneeHip Osteoarthritis	rs7792176	T	C	0.0472	0.0085113	2.93e-08	0.000591851	290.382
Knee Osteoarthritis	rs2791549	A	C	0.0457	0.00770894	3.063e-09	0.000870756	345.165
Knee Osteoarthritis	rs72979233	A	G	-0.0496	0.00832374	2.54e-09	0.000901802	357.483
Knee Osteoarthritis	rs60733780	A	G	-0.0433	0.00764133	1.457e-08	0.000827284	327.919
Knee Osteoarthritis	rs10842226	A	G	0.0467	0.00791489	3.629e-09	0.00106309	421.485
Knee Osteoarthritis	rs7967762	T	C	0.057	0.0095142	2.085e-09	0.000924566	366.515
Knee Osteoarthritis	rs1426371	A	G	-0.0515	0.00840296	8.855e-10	0.00104722	415.189
Knee Osteoarthritis	rs1790133	T	G	-0.0687	0.0110167	4.49e-10	0.00157418	624.442
Knee Osteoarthritis	rs58973023	A	T	0.0555	0.00891093	4.715e-10	0.00153943	610.635
Knee Osteoarthritis	rs4380013	A	G	0.0562	0.00916645	8.73e-10	0.000962337	381.503
Knee Osteoarthritis	rs4775006	A	C	0.0464	0.0075639	8.548e-10	0.00104573	414.599
Knee Osteoarthritis	rs12914479	C	G	0.0438	0.0075672	7.117e-09	0.000860627	341.147
Knee Osteoarthritis	rs6500609	C	G	-0.0668	0.0114344	5.157e-09	0.000875794	347.164
Knee Osteoarthritis	rs9940278	T	C	0.058	0.00710263	3.188e-16	0.00165401	656.159
Knee Osteoarthritis	rs34195470	A	G	-0.0523	0.00717542	3.128e-13	0.00135128	535.9
Knee Osteoarthritis	rs4548913	A	G	-0.051	0.00731631	3.153e-12	0.00121487	481.737
Knee Osteoarthritis	rs3859514	T	C	0.0435	0.00744448	5.119e-09	0.000858918	340.469
Knee Osteoarthritis	rs66906321	T	C	-0.0565	0.0093798	1.706e-09	0.000922177	365.567
Knee Osteoarthritis	rs7581446	T	C	-0.0565	0.00884874	1.713e-10	0.00159443	632.485
Knee Osteoarthritis	rs1047891	A	C	0.0471	0.00847487	2.735e-08	0.000945987	375.015
Knee Osteoarthritis	rs143384	A	G	0.0722	0.0071909	1.012e-23	0.00252046	1000.76
Knee Osteoarthritis	rs11703195	T	G	-0.0512	0.00862869	2.962e-09	0.000944204	374.307
Knee Osteoarthritis	rs1394094	A	T	-0.0412	0.00745003	3.199e-08	0.000762678	302.291
Knee Osteoarthritis	rs4974591	A	G	-0.0421	0.00761763	3.264e-08	0.000754438	299.022
Knee Osteoarthritis	rs7680647	T	C	-0.0442	0.00776238	1.24e-08	0.000909357	360.48
Knee Osteoarthritis	rs2066928	A	G	-0.0412	0.00722824	1.199e-08	0.00084768	336.01
Knee Osteoarthritis	rs17615906	T	C	-0.0523	0.00958669	4.884e-08	0.000734502	291.115
Knee Osteoarthritis	rs10038860	A	G	0.046	0.00789327	5.618e-09	0.000841846	333.696
Knee Osteoarthritis	rs3778540	A	T	0.04	0.00729098	4.106e-08	0.00074542	295.445
Knee Osteoarthritis	rs2855438	A	T	0.0589	0.0107135	3.847e-08	0.000845846	335.283
Hip Osteoarthritis	rs11164653	T	C	-0.0799	0.00916229	2.769e-18	0.00309559	1097.33
Hip Osteoarthritis	rs4411121	T	C	0.0648	0.00967928	2.161e-11	0.00180804	640.094
Hip Osteoarthritis	rs1046934	A	C	0.0712	0.00940875	3.807e-14	0.00230872	817.757
Hip Osteoarthritis	rs2605098	A	G	0.0651	0.00948804	6.825e-12	0.00189325	670.318
Hip Osteoarthritis	rs3740129	A	G	0.0547	0.00909881	1.835e-09	0.00148138	524.276
Hip Osteoarthritis	rs67924081	A	G	0.0642	0.010441	7.804e-10	0.00156965	555.563
Hip Osteoarthritis	rs10831477	T	G	0.0704	0.0115792	1.203e-09	0.00150263	531.808
Hip Osteoarthritis	rs10492367	T	G	0.1147	0.0112801	2.746e-24	0.00418303	1484.44
Hip Osteoarthritis	rs79056043	A	G	-0.1136	0.0189374	1.989e-09	0.00153035	541.633
Hip Osteoarthritis	rs1809889	T	C	0.0596	0.0100976	3.583e-09	0.0014341	507.52
Hip Osteoarthritis	rs12908498	C	G	0.0798	0.00969456	1.85e-16	0.00316524	1122.1
Hip Osteoarthritis	rs28567725	T	C	-0.0546	0.00906637	1.72e-09	0.00145863	516.213
Hip Osteoarthritis	rs1401796	A	C	-0.0583	0.00909169	1.432e-10	0.00169831	601.181
Hip Osteoarthritis	rs2188730	A	G	0.0722	0.0126025	1.01e-08	0.00133292	471.664
Hip Osteoarthritis	rs2521348	T	C	0.0555	0.00919173	1.56e-09	0.00146666	519.06
Hip Osteoarthritis	rs4252548	T	C	0.2254	0.0284327	2.236e-15	0.00272704	966.334
Hip Osteoarthritis	rs2862851	T	C	0.0655	0.00902152	3.859e-13	0.00213479	756.02
Hip Osteoarthritis	rs66989638	A	G	0.0789	0.013477	4.787e-09	0.00143201	506.779
Hip Osteoarthritis	rs9976458	T	G	0.0628	0.0112498	2.373e-08	0.00140919	498.692
Hip Osteoarthritis	rs12160491	A	G	-0.0614	0.00983931	4.368e-10	0.00156904	555.349
Hip Osteoarthritis	rs6786146	T	C	0.1156	0.0205672	1.903e-08	0.00131991	467.056
Hip Osteoarthritis	rs9835230	A	G	0.0638	0.0105235	1.339e-09	0.00149878	530.442
Hip Osteoarthritis	rs798756	T	C	-0.0683	0.0114223	2.238e-09	0.00145656	515.477
Hip Osteoarthritis	rs1913707	A	G	0.0677	0.00919699	1.824e-13	0.00219193	776.298
Hip Osteoarthritis	rs788857	A	G	-0.0544	0.00993906	4.416e-08	0.00124198	439.445
Hip Osteoarthritis	rs11727676	T	C	-0.0849	0.0154835	4.176e-08	0.00128589	455.002
Hip Osteoarthritis	rs10940168	A	G	-0.0534	0.00924821	7.737e-09	0.00136194	481.947
Hip Osteoarthritis	rs17677724	T	C	0.0723	0.0122447	3.535e-09	0.0014129	500.007
Hip Osteoarthritis	rs4073717	T	G	-0.0672	0.0112767	2.535e-09	0.0014521	513.897
Hip Osteoarthritis	rs79220007	T	C	-0.1059	0.0177055	2.215e-09	0.00152741	540.59
Hip Osteoarthritis	rs6908606	A	G	-0.0688	0.00991049	3.862e-12	0.00194525	688.762
Hip Osteoarthritis	rs9475400	T	C	0.1084	0.0151383	8.029e-13	0.00209062	740.344
Hip Osteoarthritis	rs111844273	A	G	0.2317	0.0325242	1.049e-12	0.00219713	778.144
Spine Osteoarthritis	rs2640909	T	C	-0.056	0.0117919	2.044e-06	0.00129613	433.4
Spine Osteoarthritis	rs11121639	A	G	0.1179	0.024328	1.258e-06	0.00227461	761.332
Spine Osteoarthritis	rs10900550	T	C	0.0505	0.010703	2.378e-06	0.0012153	406.341
Spine Osteoarthritis	rs6685753	A	G	-0.0795	0.016366	1.188e-06	0.00122664	410.138
Spine Osteoarthritis	rs11022766	T	G	0.0523	0.0111574	2.766e-06	0.00127633	426.771
Spine Osteoarthritis	rs34007448	T	G	0.0819	0.0161839	4.18e-07	0.00131753	440.568
Spine Osteoarthritis	rs117175376	A	T	0.246	0.0524478	2.727e-06	0.00128119	428.398
Spine Osteoarthritis	rs12310519	T	C	0.0766	0.0138917	3.506e-08	0.00153296	512.713
Spine Osteoarthritis	rs61940788	A	G	-0.1918	0.0407479	2.514e-06	0.00120106	401.575
Spine Osteoarthritis	rs11058226	T	C	-0.0545	0.0115281	2.272e-06	0.00112475	376.032
Spine Osteoarthritis	rs201930306	T	G	0.1367	0.0280759	1.122e-06	0.00193918	648.842
Spine Osteoarthritis	rs140660278	A	C	-2.2553	0.489232	4.029e-06	0.00305091	1021.96
Spine Osteoarthritis	rs12908498	C	G	0.0543	0.0111005	9.998e-07	0.00146824	491.038
Spine Osteoarthritis	rs1104785	A	G	-0.0497	0.0100462	7.531e-07	0.00123479	412.865
Spine Osteoarthritis	rs28495999	A	G	-0.0686	0.0141543	1.256e-06	0.00235289	787.596
Spine Osteoarthritis	rs6435326	A	T	0.0466	0.010091	3.875e-06	0.00108326	362.144
Spine Osteoarthritis	rs117428541	T	C	0.1844	0.0380461	1.255e-06	0.00125449	419.461
Spine Osteoarthritis	rs17193904	A	C	0.1368	0.0297828	4.364e-06	0.0085395	2876.31
Spine Osteoarthritis	rs4682707	A	G	0.0576	0.0118629	1.201e-06	0.00160272	536.083
Spine Osteoarthritis	rs8180502	A	G	-0.0537	0.0108343	7.178e-07	0.00125415	419.347
Spine Osteoarthritis	rs10043720	A	G	0.0593	0.0127173	3.117e-06	0.00150489	503.312
Spine Osteoarthritis	rs185195500	A	T	0.1168	0.0252954	3.885e-06	0.00191603	641.081
Rheumatoid arthritis	rs189070938	A	T	0.825232	0.136881	1.65132e-09	0.0226306	10566.5
Rheumatoid arthritis	rs2476601	A	G	0.4218	0.0551672	2.07574e-14	0.0324818	15320.6
Rheumatoid arthritis	rs10065637	T	C	-0.221101	0.0400799	3.45831e-08	0.0159334	7388.85
Rheumatoid arthritis	rs6910879	G	A	0.917643	0.0678156	1.02005e-41	0.123299	64180.1
Rheumatoid arthritis	rs9275602	A	C	0.350775	0.0413172	2.06957e-17	0.0388946	18467.7
Seronegative rheumatoid arthritis	rs2476601	G	A	-0.266974	0.0320869	8.77001e-17	0.017833	4803.59
Seronegative rheumatoid arthritis	rs145575084	C	G	0.662414	0.0377678	7.20278e-69	0.0604106	17009.9
Seronegative rheumatoid arthritis	rs36229731	C	A	0.236605	0.0287235	1.76076e-16	0.0182465	4917.04
Seronegative rheumatoid arthritis	rs17612852	A	G	0.384548	0.028524	2.00771e-41	0.0592069	16649.6
Seronegative rheumatoid arthritis	rs1132988	T	A	-0.222617	0.036092	6.91433e-10	0.0121632	3257.53
Seronegative rheumatoid arthritis	rs11513729	T	C	0.147252	0.0247334	2.62374e-09	0.0102173	2731
Seronegative rheumatoid arthritis	rs1374426	T	C	0.151286	0.0265592	1.22512e-08	0.00933441	2492.79
Seropositive rheumatoid arthritis	rs2476601	G	A	-0.406337	0.0202233	8.5842e-90	0.0416403	14881.2
Seropositive rheumatoid arthritis	rs78782944	T	C	0.147923	0.0261696	1.58143e-08	0.00375632	1291.36
Seropositive rheumatoid arthritis	rs10174238	A	G	-0.115206	0.0183797	3.65384e-10	0.00478711	1647.44
Seropositive rheumatoid arthritis	rs1024162	T	A	-0.13348	0.0171949	8.30998e-15	0.00781727	2698.45
Seropositive rheumatoid arthritis	rs10517086	A	G	0.101788	0.0173405	4.35943e-09	0.00419725	1443.59
Seropositive rheumatoid arthritis	rs13180950	C	T	0.123808	0.0214552	7.90296e-09	0.00402665	1384.68
Seropositive rheumatoid arthritis	rs72849211	G	C	0.203785	0.0224336	1.04761e-19	0.00937729	3242.06
Seropositive rheumatoid arthritis	rs144835716	T	A	0.62111	0.0348244	3.74887e-71	0.0272591	9597.69
Seropositive rheumatoid arthritis	rs7453967	T	G	0.230301	0.022602	2.21106e-24	0.0142176	4939.65
Seropositive rheumatoid arthritis	rs28579922	A	G	-0.669912	0.0276263	6.77642e-130	0.0981569	37277.1
Seropositive rheumatoid arthritis	rs2395269	G	T	-0.198634	0.0201729	7.09251e-23	0.0130264	4520.35
Seropositive rheumatoid arthritis	rs2144016	G	A	-0.325161	0.0190602	2.96142e-65	0.0396809	14152
Seropositive rheumatoid arthritis	rs1571878	T	C	-0.118078	0.0159094	1.15478e-13	0.00689642	2378.38
Seropositive rheumatoid arthritis	rs60600003	G	T	0.147392	0.0253979	6.5016e-09	0.0039806	1368.78
Seropositive rheumatoid arthritis	rs56088330	A	T	0.0919393	0.0159657	8.48301e-09	0.00419637	1443.28
Seropositive rheumatoid arthritis	rs113076234	A	G	0.112888	0.020389	3.08163e-08	0.0037243	1280.32
Seropositive rheumatoid arthritis	rs3118470	C	T	0.0919558	0.015938	7.94603e-09	0.00416935	1433.95
Seropositive rheumatoid arthritis	rs725529	T	A	0.0976593	0.0159468	9.12053e-10	0.00476842	1640.97
Seropositive rheumatoid arthritis	rs2013002	C	T	-0.111923	0.0161996	4.88203e-12	0.00591162	2036.73
Seropositive rheumatoid arthritis	rs1957569	G	A	-0.0944257	0.0172945	4.76475e-08	0.00386334	1328.3
Seropositive rheumatoid arthritis	rs117753409	A	C	0.152737	0.027157	1.86342e-08	0.00363945	1251.04
Seropositive rheumatoid arthritis	rs34536443	C	G	-0.438459	0.0526539	8.27942e-17	0.0112736	3905.16
Ankylosing spondylitis	rs148257298	T	C	2.81839	0.598562	2.49427e-06	0.187938	105614
Ankylosing spondylitis	rs9262619	C	G	0.590728	0.122085	1.30711e-06	0.134474	70900.8
Ankylosing spondylitis	rs3998320	A	G	7.74282	0.41988	6.20877e-76	4.8612	574534
Ankylosing spondylitis	rs4151651	A	G	2.79167	0.34677	8.24682e-16	0.583061	638169
Ankylosing spondylitis	rs78091800	C	G	3.00891	0.539843	2.49417e-08	0.282573	179741
Ankylosing spondylitis	rs34361513	A	G	1.54753	0.337103	4.41813e-06	0.150448	80814.8
Ankylosing spondylitis	rs693196	T	C	0.578329	0.121333	1.87507e-06	0.131427	69051.5
Ankylosing spondylitis	rs118052498	G	A	2.04682	0.445804	4.40508e-06	0.162932	88826
Ankylosing spondylitis	rs576342012	T	C	2.40909	0.520728	3.72113e-06	0.181788	101389
Ankylosing spondylitis	rs16957279	G	A	0.527693	0.11064	1.847e-06	0.126559	66123.1
Ankylosing spondylitis	rs285761	G	A	0.526153	0.114138	4.03038e-06	0.119195	61754.8
Ankylosing spondylitis	rs139932310	T	C	3.34779	0.724665	3.84156e-06	0.196313	111469
Ankylosing spondylitis	rs56179532	G	T	3.65254	0.791609	3.94848e-06	0.202323	115748
Juvenile idiopathic arthritis	rs6679677	A	C	0.286281	0.0503771	1.32538e-08	0.0203161	5442.4
Juvenile idiopathic arthritis	rs9461245	A	G	0.290947	0.0523447	2.72439e-08	0.0197519	5288.21
Juvenile idiopathic arthritis	rs2734976	T	C	0.23213	0.0387647	2.12183e-09	0.0266604	7188.52
Juvenile idiopathic arthritis	rs115681000	G	A	0.812856	0.0559778	8.91251e-48	0.0944248	27365.2
Juvenile idiopathic arthritis	rs9272349	A	G	0.588067	0.0607946	3.92645e-22	0.0875037	25167
Juvenile idiopathic arthritis	rs11065979	T	C	0.224616	0.0388217	7.21506e-09	0.0238746	6419
Juvenile idiopathic arthritis	rs8048448	C	T	0.244723	0.042337	7.45453e-09	0.0231676	6224.41
Gout	rs4475146	A	C	-0.47	0.044	4.11039e-26	NA	114.101
Gout	rs1481012	A	G	-0.55	0.046	2.04613e-32	NA	142.958
Gout	rs13287980	A	G	0.24	0.047	9.7059e-07	NA	26.0751
Gout	rs9311138	A	G	0.23	0.047	1.01099e-06	NA	23.9475
Gout	rs17074636	T	G	-0.71	0.14	6.8246e-07	NA	25.7194
Gout	rs8087353	T	C	-0.2	0.043	4.98887e-06	NA	21.6333
Gout	rs8085724	A	G	-1.8	0.36	1.04098e-06	NA	25
Osteoporosis	rs1991856	T	G	-0.293768	0.0626431	2.73811e-06	0.0233204	10896.3
Osteoporosis	rs79056671	A	G	0.898699	0.195346	4.21362e-06	0.0256842	12029.9
Osteoporosis	rs2505084	A	G	-0.219067	0.0458443	1.76614e-06	0.0239545	11199.8
Osteoporosis	rs113866131	C	G	0.854514	0.175762	1.16334e-06	0.0277874	13043.1
Osteoporosis	rs4149586	A	C	0.876019	0.186262	2.56185e-06	0.026402	12375.2
Osteoporosis	rs36071623	A	G	0.542514	0.118366	4.57548e-06	0.0231629	10820.9
Osteoporosis	rs80092501	G	T	0.564111	0.116903	1.39693e-06	0.0259553	12160.2
Osteoporosis	rs205414	T	C	0.34503	0.0693232	6.45387e-07	0.0265684	12455.3
Osteoporosis	rs11084610	C	G	-0.225443	0.0448192	4.9035e-07	0.0252308	11812
Osteoporosis with pathological fracture	rs11800051	C	T	0.0380133	0.038013	6.4e-09	0.000719662	307.368
Osteoporosis with pathological fracture	rs1159798	C	A	-0.0434024	NA	2.7e-08	0.000650712	277.9
Osteoporosis with pathological fracture	rs11003048	G	C	-0.0830762	NA	4.4e-15	0.00131827	563.371
Osteoporosis with pathological fracture	rs1055447	A	C	-0.0369327	NA	1.9e-08	0.000678185	289.641
Osteoporosis with pathological fracture	rs35989399	T	C	-0.0516913	NA	3.5e-09	0.00074342	317.522
Osteoporosis with pathological fracture	rs576679	A	G	-0.0449817	NA	2.4e-10	0.000867391	370.518
Osteoporosis with pathological fracture	rs2430691	C	T	-0.0363673	NA	4.7e-08	0.000648122	276.794
Osteoporosis with pathological fracture	rs2926799	A	G	-0.0461665	NA	4.4e-08	0.000679978	290.407
Osteoporosis with pathological fracture	rs4842509	T	C	0.0366482	0.036648	2.9e-08	0.000642669	274.463
Osteoporosis with pathological fracture	rs4793022	C	G	0.0524957	0.052496	2.3e-14	0.00130139	556.147
Osteoporosis with pathological fracture	rs4796995	G	A	-0.0437983	NA	1.4e-10	0.000882576	377.01
Osteoporosis with pathological fracture	rs10490045	C	T	-0.0515702	NA	7.8e-11	0.000902947	385.72
Osteoporosis with pathological fracture	rs2836789	T	C	-0.0507303	NA	5.6e-12	0.00102336	437.21
Osteoporosis with pathological fracture	rs78520297	C	T	-0.0662723	NA	1e-12	0.00111011	474.314
Osteoporosis with pathological fracture	rs7741021	C	A	0.0681389	0.068139	2.8e-25	0.00231741	991.354
Osteoporosis with pathological fracture	rs4869742	T	C	-0.0507587	NA	1.5e-12	0.00105678	451.504
Osteoporosis with pathological fracture	rs3020332	T	C	0.0412561	0.041256	4e-10	0.000842869	360.034
Osteoporosis with pathological fracture	rs62449134	A	G	-0.0408647	NA	2.3e-08	0.000671211	286.661
Osteoporosis with pathological fracture	rs6963134	G	A	0.0522565	0.052257	2.1e-14	0.00123835	529.172
Osteoporosis with pathological fracture	rs2908007	G	A	0.100019	0.100019	2.1e-50	0.00479574	2056.65
Osteomalacia	rs115291886	A	G	1.96012	0.395473	7.18175e-07	0.0287389	9643.73
Osteomalacia	rs150776655	A	G	0.568805	0.121214	2.69793e-06	0.0731822	25734.9
Osteomalacia	rs9592550	T	C	0.895722	0.189297	2.2251e-06	0.0571626	19760
Osteomalacia	rs11077725	T	C	0.527866	0.110726	1.86685e-06	0.0782166	27655.5
Osteonecrosis	rs115364578	G	A	0.691926	0.150249	4.12082e-06	0.0915736	46001.8
Osteonecrosis	rs17587029	G	A	1.14106	0.23383	1.06172e-06	0.117524	60773.8
Osteonecrosis	rs77623237	C	T	0.568381	0.121251	2.76382e-06	0.0930595	46824.8
Osteonecrosis	rs149600208	T	C	1.96688	0.41923	2.71024e-06	0.122902	63945
Osteonecrosis	rs118001548	A	G	1.38166	0.276782	5.97912e-07	0.128191	67101.3
Osteonecrosis	rs1796260	C	T	-0.527191	0.113779	3.59588e-06	0.0889767	44569.9
Osteonecrosis	rs74885890	T	C	0.882677	0.179792	9.13341e-07	0.109007	55830.7
Osteonecrosis	rs79745384	T	C	1.22742	0.26477	3.55587e-06	0.1039	52911.9
Osteomyelitis	rs7175314	T	C	0.528277	0.112364	2.58267e-06	0.0917185	46081.9
Osteomyelitis	rs61731746	G	T	1.25261	0.248397	4.58826e-07	0.125843	65695.5
Osteomyelitis	rs9303952	A	G	0.545371	0.118248	3.98626e-06	0.0900879	45181.6
Osteomyelitis	rs9609779	A	C	0.508725	0.10514	1.30798e-06	0.0958796	48394.3
Meniscus derangement	rs137939848	C	G	0.0854479	0.0177406	1.46083e-06	0.00128633	313.081
Meniscus derangement	rs12407338	A	G	-0.0505998	0.0110187	4.38622e-06	0.00111725	271.884
Meniscus derangement	rs333453	A	T	-0.0574688	0.011425	4.90241e-07	0.00133869	325.841
Meniscus derangement	rs4845298	C	T	-0.0488203	0.0104476	2.96982e-06	0.00118414	288.179
Meniscus derangement	rs9726352	A	G	0.0600507	0.011255	9.52928e-08	0.00150341	365.996
Meniscus derangement	rs28581519	A	G	-0.0704484	0.0140921	5.75838e-07	0.00134674	327.803
Meniscus derangement	rs2820449	A	G	0.0484737	0.0106175	4.9846e-06	0.00108054	262.94
Meniscus derangement	rs3771517	T	C	-0.050517	0.0107232	2.46479e-06	0.00115752	281.694
Meniscus derangement	rs143847405	A	G	-0.112256	0.024461	4.44979e-06	0.00116754	284.136
Meniscus derangement	rs13076741	C	T	0.0508766	0.0105155	1.31e-06	0.00122727	298.69
Meniscus derangement	rs9858826	G	A	-0.0545545	0.0116592	2.88138e-06	0.00116174	282.721
Meniscus derangement	rs114539878	C	T	-0.18337	0.036013	3.54748e-07	0.00153729	374.258
Meniscus derangement	rs9883248	G	A	-0.046709	0.0102321	4.99597e-06	0.00109083	265.447
Meniscus derangement	rs35316639	A	G	0.0483776	0.0104838	3.94022e-06	0.00111884	272.269
Meniscus derangement	rs34049648	A	G	0.0497289	0.0103052	1.39566e-06	0.00121102	294.73
Meniscus derangement	rs12645533	G	T	0.0908773	0.0192201	2.26485e-06	0.00111905	272.321
Meniscus derangement	rs7722739	T	G	-0.100577	0.0184672	5.14434e-08	0.00162814	396.41
Meniscus derangement	rs255575	C	T	0.0486458	0.0102639	2.14264e-06	0.00118292	287.883
Meniscus derangement	rs4547914	T	C	0.110365	0.0233321	2.24321e-06	0.00124814	303.775
Meniscus derangement	rs270397	A	G	-0.0554177	0.0102194	5.8684e-08	0.00153551	373.822
Meniscus derangement	rs171937	C	T	-0.0531865	0.0107122	6.86815e-07	0.00131936	321.131
Meniscus derangement	rs1264622	T	C	0.0699711	0.0142088	8.45843e-07	0.00123669	300.985
Meniscus derangement	rs1359070	C	T	0.0607553	0.0129297	2.61571e-06	0.00113727	276.76
Meniscus derangement	rs9321725	T	C	-0.0476841	0.0104211	4.74559e-06	0.00111808	272.084
Meniscus derangement	rs60078706	A	G	0.0484625	0.0103161	2.63039e-06	0.00115795	281.798
Meniscus derangement	rs2720588	C	A	0.0561224	0.01117	5.0501e-07	0.00138614	337.407
Meniscus derangement	rs6994642	T	C	0.0736357	0.0156514	2.54208e-06	0.00113991	277.403
Meniscus derangement	rs1393972	A	C	-0.0514291	0.0111811	4.23224e-06	0.00113385	275.927
Meniscus derangement	rs118152212	T	C	0.218316	0.0413564	1.29972e-07	0.00136185	331.487
Meniscus derangement	rs148320793	A	G	0.317919	0.0639123	6.54847e-07	0.00109889	267.41
Meniscus derangement	rs10762491	T	A	-0.0480295	0.0103794	3.70331e-06	0.00113787	276.906
Meniscus derangement	rs41274604	C	T	0.124001	0.0262455	2.30531e-06	0.00110742	269.488
Meniscus derangement	rs10736167	T	C	-0.077898	0.0162388	1.61027e-06	0.00117682	286.397
Meniscus derangement	rs2350205	G	T	0.0520383	0.0103876	5.45343e-07	0.00130743	318.222
Meniscus derangement	rs117300515	G	A	0.550057	0.119862	4.45164e-06	0.000859198	209.032
Meniscus derangement	rs12830284	C	A	-0.0486263	0.0102573	2.13054e-06	0.00117833	286.764
Meniscus derangement	rs2171126	T	C	0.0480187	0.0102085	2.55358e-06	0.00115254	280.482
Meniscus derangement	rs10861879	A	G	-0.0482811	0.0105671	4.90038e-06	0.00110192	268.149
Meniscus derangement	rs3118905	A	G	-0.0600597	0.0111106	6.45907e-08	0.00154947	377.226
Meniscus derangement	rs77899930	A	G	0.133744	0.0284753	2.6421e-06	0.00108815	264.794
Meniscus derangement	rs35958750	T	C	-0.0670267	0.0145057	3.82393e-06	0.00114531	278.719
Meniscus derangement	rs143299874	G	C	0.153431	0.033451	4.50236e-06	0.00101756	247.6
Meniscus derangement	rs2732227	A	G	-0.0530137	0.0113277	2.8686e-06	0.0011658	283.711
Meniscus derangement	rs10406463	G	A	0.048611	0.0104836	3.53704e-06	0.00113411	275.99
Meniscus derangement	rs143383	A	G	0.080643	0.010425	1.02967e-14	0.00316249	771.171
Meniscus derangement	rs4811309	A	G	-0.049134	0.0102665	1.70247e-06	0.00120697	293.743
Meniscus derangement	rs2832231	C	T	0.049113	0.0106581	4.06481e-06	0.00109817	267.235
Sciatica and lumbago	rs187042712	C	T	0.591289	0.121549	1.14679e-06	0.01751	8133.04
Sciatica and lumbago	rs113513521	T	G	0.693459	0.142065	1.05407e-06	0.0179394	8336.12
Sciatica and lumbago	rs33196	G	C	0.331464	0.0696715	1.95976e-06	0.0157531	7303.93
Sciatica and lumbago	rs2072780	T	C	0.207671	0.0452779	4.50552e-06	0.0141908	6569.12
Sciatica and lumbago	rs72817029	T	C	0.47895	0.102013	2.66614e-06	0.0157369	7296.29
Sciatica and lumbago	rs187792408	A	C	1.13692	0.245084	3.50316e-06	0.0175894	8170.55
Sciatica and lumbago	rs1397677	T	C	-0.217915	0.0430405	4.12662e-07	0.0178126	8276.12
Sciatica and lumbago	rs3760711	T	C	0.636667	0.125735	4.11519e-07	0.0191342	8902.15
Lateral epicondylitis	rs11888649	C	T	-0.218939	0.0464353	2.41808e-06	0.00674641	1744.82
Lateral epicondylitis	rs17810787	T	G	0.156153	0.0320525	1.10586e-06	0.00593738	1534.33
Lateral epicondylitis	rs11154109	A	G	0.110944	0.0231898	1.717e-06	0.00615362	1590.56
Lateral epicondylitis	rs79140820	C	T	0.235436	0.0493814	1.86325e-06	0.00536835	1386.49
Lateral epicondylitis	rs139651344	A	G	0.632951	0.136878	3.76062e-06	0.00440536	1136.68
Lateral epicondylitis	rs6482191	G	T	-0.121409	0.0246067	8.05601e-07	0.00635912	1644.02
Lateral epicondylitis	rs8042593	A	G	-0.112646	0.0239143	2.47212e-06	0.00584114	1509.32
Lateral epicondylitis	rs60238138	A	C	0.526434	0.109497	1.52644e-06	0.00458511	1183.27
Lateral epicondylitis	rs7243825	G	A	-0.130951	0.0246572	1.09114e-07	0.00737344	1908.2
Lateral epicondylitis	rs12985868	C	T	-0.117479	0.0248226	2.21503e-06	0.0062568	1617.4
Cervical disc disorders	rs13031261	T	C	0.0732643	0.0133802	4.36e-08	0.00266781	697.653
Cervical disc disorders	rs7816342	A	G	-0.100542	0.0174279	7.97e-09	0.00311673	815.416
Cervical disc disorders	rs1993936	A	G	-0.0942312	0.0159468	3.44e-09	0.0032329	845.906
Cervical disc disorders	rs2761882	T	C	-0.0735982	0.0134174	4.13e-08	0.0026767	699.985
Usual walking pace	rs2297600	G	T	-0.0115607	0.00168167	6.20012e-12	3.80572e-05	17.5037
Usual walking pace	rs113825410	G	A	-0.00881182	0.00151778	6.4e-09	2.70273e-05	12.4305
Usual walking pace	rs11548200	C	T	-0.016041	0.00255177	3.29997e-10	3.17389e-05	14.5976
Usual walking pace	rs2644135	G	C	0.00751192	0.00133245	1.7e-08	2.54702e-05	11.7144
Usual walking pace	rs12747822	A	T	0.0117683	0.00213998	3.79997e-08	2.44666e-05	11.2528
Usual walking pace	rs12042959	G	A	0.0125663	0.00181269	4.10015e-12	3.89005e-05	17.8915
Usual walking pace	rs55680124	T	C	-0.010742	0.00174984	8.30004e-10	3.02127e-05	13.8956
Usual walking pace	rs1592	C	A	0.0074513	0.00128817	7.29995e-09	2.65473e-05	12.2098
Usual walking pace	rs139398785	G	C	-0.00999513	0.00182329	4.20001e-08	2.41162e-05	11.0916
Usual walking pace	rs11682482	G	T	0.00801894	0.00135595	3.29997e-09	2.79477e-05	12.8539
Usual walking pace	rs2280406	A	G	-0.00996145	0.00126505	3.40017e-15	4.96077e-05	22.8163
Usual walking pace	rs830627	A	G	0.00742054	0.00128505	7.69999e-09	2.67821e-05	12.3178
Usual walking pace	rs6763292	G	A	0.00958833	0.00153076	3.79997e-10	3.14556e-05	14.4673
Usual walking pace	rs28519617	G	T	-0.00812933	0.0014336	1.40001e-08	2.60397e-05	11.9763
Usual walking pace	rs57800857	C	A	0.00867607	0.00132214	5.30029e-11	3.48877e-05	16.0458
Usual walking pace	rs11732213	C	T	0.0091614	0.00159593	9.40005e-09	2.64121e-05	12.1476
Usual walking pace	rs144333966	G	A	0.0304614	0.00544615	2.19999e-08	2.67819e-05	12.3177
Usual walking pace	rs13107325	T	C	-0.0242429	0.00240623	7.10068e-24	8.1426e-05	37.4519
Usual walking pace	rs35711462	G	A	-0.0071659	0.00126947	1.7e-08	2.56621e-05	11.8027
Usual walking pace	rs205262	G	A	-0.00870949	0.00142654	1e-09	2.98273e-05	13.7184
Usual walking pace	rs11152989	T	C	-0.00751226	0.00136699	3.89996e-08	2.4239e-05	11.1481
Usual walking pace	rs4715208	G	A	-0.0083844	0.00146572	1.09999e-08	2.61594e-05	12.0314
Usual walking pace	rs4839898	A	G	0.0130564	0.00206037	2.30001e-10	3.3321e-05	15.3253
Usual walking pace	rs9366651	T	G	0.00948542	0.00127132	8.60003e-14	4.49777e-05	20.6868
Usual walking pace	rs7789719	C	T	0.00854199	0.00153719	2.69998e-08	2.48674e-05	11.4371
Usual walking pace	rs11761141	G	T	-0.00789936	0.00135132	5e-09	2.74083e-05	12.6058
Usual walking pace	rs7795394	A	T	0.00930493	0.00130867	1.20005e-12	4.05867e-05	18.6671
Usual walking pace	rs4109292	A	G	0.00735336	0.00126787	6.59994e-09	2.7032e-05	12.4327
Usual walking pace	rs7896518	G	A	0.00999095	0.00129269	1.10002e-14	4.88711e-05	22.4776
Usual walking pace	rs10883618	A	G	0.0078103	0.00130834	2.39999e-09	2.85093e-05	13.1122
Usual walking pace	rs10828258	G	A	-0.00932641	0.00135882	6.70039e-12	3.78118e-05	17.3908
Usual walking pace	rs2439823	G	A	-0.0072789	0.00127453	1.09999e-08	2.62711e-05	12.0827
Usual walking pace	rs11039324	A	G	-0.0102105	0.00128765	2.19989e-15	5.02041e-05	23.0907
Usual walking pace	rs9783304	T	G	0.00763598	0.00136834	2.39999e-08	2.49812e-05	11.4895
Usual walking pace	rs10750025	T	C	-0.0083554	0.00136528	9.40005e-10	3.02937e-05	13.9329
Usual walking pace	rs10862220	G	T	0.00840767	0.00135051	4.79999e-10	3.10199e-05	14.2669
Usual walking pace	rs2645979	A	G	0.00861798	0.00132024	6.70039e-11	3.4106e-05	15.6863
Usual walking pace	rs2170670	A	G	-0.00708769	0.0012972	4.70002e-08	2.3969e-05	11.0239
Usual walking pace	rs12883788	T	C	-0.00779959	0.00127443	9.40005e-10	3.02197e-05	13.8988
Usual walking pace	rs45583845	G	C	-0.0198998	0.0036328	4.30002e-08	2.62185e-05	12.0585
Usual walking pace	rs8011870	A	G	-0.00782739	0.00140635	2.59998e-08	2.51401e-05	11.5625
Usual walking pace	rs8010773	C	T	-0.00816754	0.00130079	3.40001e-10	3.14992e-05	14.4873
Usual walking pace	rs11848096	C	T	-0.00750831	0.00130696	9.20005e-09	2.67392e-05	12.298
Usual walking pace	rs8028757	T	A	0.0107284	0.00192335	2.39999e-08	2.61012e-05	12.0046
Usual walking pace	rs11150623	T	G	-0.00968813	0.0013224	2.39994e-13	4.29909e-05	19.7729
Usual walking pace	rs62048402	A	G	-0.00987537	0.00129011	1.9002e-14	4.69481e-05	21.5931
Usual walking pace	rs4516268	A	C	0.00983008	0.00160664	9.49992e-10	3.0184e-05	13.8824
Usual walking pace	rs4643373	C	T	0.0077266	0.00138223	2.30001e-08	2.50729e-05	11.5316
Usual walking pace	rs11077815	C	T	-0.00713336	0.00130691	4.79999e-08	2.38862e-05	10.9859
Usual walking pace	rs613872	T	G	-0.0147074	0.00167052	1.29987e-18	6.22254e-05	28.6201
Usual walking pace	rs891387	C	T	0.00786028	0.00126616	5.39995e-10	3.08888e-05	14.2066
Usual walking pace	rs11881338	A	T	0.00817022	0.00127146	1.29999e-10	3.33551e-05	15.341
Usual walking pace	rs2602731	G	A	-0.00766675	0.00136907	2.1e-08	2.55357e-05	11.7445
Usual walking pace	rs273512	T	C	-0.00966507	0.00129058	6.89922e-14	4.50331e-05	20.7123
Usual walking pace	rs2037735	T	C	-0.0112677	0.00194308	6.69993e-09	2.69353e-05	12.3882
Usual walking pace	rs12461902	A	G	-0.00801134	0.00135739	3.59998e-09	2.8364e-05	13.0453
Usual walking pace	rs819167	G	A	-0.0157993	0.00259282	1.09999e-09	2.97032e-05	13.6613
Physical activity	rs2230288	T	C	1.06082	0.149491	1.28233e-12	0.0202148	136.501
Physical activity	rs2991959	T	C	-0.624965	0.12882	1.22552e-06	0.0225841	152.869
Physical activity	rs59557467	T	C	0.263878	0.0564639	2.96169e-06	0.0138097	92.6443
Physical activity	rs6733839	T	C	0.22653	0.0385412	4.16035e-09	0.0236909	160.542
Physical activity	rs365535	C	T	-0.187458	0.0405027	3.68689e-06	0.0154979	104.148
Physical activity	rs6599388	T	C	0.220396	0.0399821	3.53932e-08	0.0207944	140.498
Physical activity	rs7680557	A	C	0.240262	0.0371284	9.72971e-11	0.0288613	196.621
Physical activity	rs10039591	A	G	0.176484	0.0383072	4.08348e-06	0.014989	100.677
Physical activity	rs117947506	A	G	0.576119	0.121953	2.31153e-06	0.0119743	80.1822
Physical activity	rs2467712	G	A	-0.198263	0.0381486	2.0239e-07	0.0188412	127.047
Physical activity	rs10980539	A	G	0.237362	0.0513896	3.857e-06	0.0135769	91.0611
Physical activity	rs11006709	G	A	0.874906	0.189619	3.9493e-06	0.0109454	73.2159
Physical activity	rs1334587	C	G	0.190678	0.0408967	3.12385e-06	0.0146432	98.319
Physical activity	rs79077077	T	A	0.363941	0.0753688	1.37335e-06	0.0142658	95.7487
Physical activity	rs8058532	T	C	-0.170713	0.0372104	4.48126e-06	0.014489	97.2683
Physical activity	rs16943674	T	C	-0.303494	0.0654993	3.59426e-06	0.0173901	117.089
Physical activity	rs117310449	T	C	0.889565	0.16344	5.24626e-08	0.0128631	86.2109
Physical activity	rs769449	A	G	0.902123	0.0538205	4.65372e-63	0.146585	1136.38
Physical activity	rs8101195	A	G	0.241086	0.0504834	1.79221e-06	0.017326	116.65
Muscle wasting and atrophy	rs11028189	T	C	0.588517	0.12849	4.6444e-06	0.100166	37716.3
Muscle wasting and atrophy	rs67994022	A	G	0.624162	0.1374	5.55495e-06	0.0914808	34116.6
Muscle wasting and atrophy	rs149812776	T	A	0.852914	0.189152	6.50879e-06	0.0751512	27531.8
Muscle wasting and atrophy	rs79595506	T	C	1.88637	0.424177	8.70302e-06	0.0345233	12115.5
Hand grip strength (left)	rs6680160	G	A	0.0100686	0.00153878	6.00067e-11	4.7363e-05	21.8365
Hand grip strength (left)	rs7516571	G	A	0.00937798	0.00169361	3.09999e-08	3.37587e-05	15.5641
Hand grip strength (left)	rs150330307	C	T	-0.0307753	0.0042167	2.90001e-13	5.84915e-05	26.9676
Hand grip strength (left)	rs2800789	C	A	0.00826025	0.00149261	3.09999e-08	3.40631e-05	15.7044
Hand grip strength (left)	rs1044299	T	C	0.01401	0.00149362	6.59933e-21	9.73077e-05	44.8656
Hand grip strength (left)	rs11121542	A	G	-0.0157601	0.00225916	2.99985e-12	5.34651e-05	24.65
Hand grip strength (left)	rs4121165	A	G	-0.0114169	0.00181868	3.40001e-10	4.34669e-05	20.0402
Hand grip strength (left)	rs58670122	G	A	-0.0118148	0.00214462	3.59998e-08	3.42454e-05	15.7885
Hand grip strength (left)	rs10788958	G	C	0.0141976	0.00156276	1e-19	9.23387e-05	42.5743
Hand grip strength (left)	rs4335354	A	C	-0.00939409	0.00160262	4.60002e-09	3.81188e-05	17.5743
Hand grip strength (left)	rs1884447	A	G	0.00846069	0.00151391	2.30001e-08	3.43761e-05	15.8488
Hand grip strength (left)	rs61818100	C	T	0.0134422	0.00231335	6.19998e-09	3.72229e-05	17.1613
Hand grip strength (left)	rs823130	T	C	-0.0113317	0.00150098	4.40048e-14	6.30475e-05	29.0683
Hand grip strength (left)	rs11204664	C	T	-0.00865184	0.00150032	8.10009e-09	3.64993e-05	16.8277
Hand grip strength (left)	rs6689375	T	A	-0.0160169	0.00191158	5.30029e-17	7.75179e-05	35.7404
Hand grip strength (left)	rs6433478	C	T	0.00905674	0.00149951	1.5e-09	4.06914e-05	18.7605
Hand grip strength (left)	rs12473732	T	C	0.0109869	0.00148601	1.39991e-13	6.0312e-05	27.807
Hand grip strength (left)	rs7571789	C	T	0.0129539	0.001487	2.99985e-18	8.37276e-05	38.6037
Hand grip strength (left)	rs7575451	G	C	-0.00973095	0.00155349	3.79997e-10	4.30987e-05	19.8704
Hand grip strength (left)	rs1434095	C	T	0.0140301	0.00225906	5.30005e-10	4.30238e-05	19.8359
Hand grip strength (left)	rs17630248	C	T	-0.009184	0.00156162	4.09996e-09	3.82656e-05	17.642
Hand grip strength (left)	rs1981612	A	C	0.00922755	0.00151053	1e-09	4.22443e-05	19.4765
Hand grip strength (left)	rs11125803	T	C	0.0142851	0.00169673	3.80014e-17	7.84227e-05	36.1576
Hand grip strength (left)	rs1641457	G	T	0.0120456	0.0017829	1.39991e-11	5.0331e-05	23.205
Hand grip strength (left)	rs3819121	C	T	0.0140963	0.00152872	2.90001e-20	9.25271e-05	42.6612
Hand grip strength (left)	rs10176878	C	T	-0.0129478	0.0018962	8.60003e-12	5.178e-05	23.8731
Hand grip strength (left)	rs61286123	C	T	-0.0101041	0.00177111	1.2e-08	3.59306e-05	16.5655
Hand grip strength (left)	rs34030812	C	T	-0.0101679	0.00154042	4.10015e-11	4.80555e-05	22.1558
Hand grip strength (left)	rs10205394	C	G	-0.0113217	0.00185667	1.09999e-09	4.11297e-05	18.9626
Hand grip strength (left)	rs1551042	C	A	-0.0111279	0.00155167	7.39946e-13	5.65616e-05	26.0777
Hand grip strength (left)	rs9866627	A	C	-0.0155989	0.00267761	5.69994e-09	3.75971e-05	17.3338
Hand grip strength (left)	rs112485536	T	C	0.0161779	0.00281803	9.40005e-09	3.65397e-05	16.8463
Hand grip strength (left)	rs62253653	G	A	0.0106985	0.00163146	5.50047e-11	4.76443e-05	21.9662
Hand grip strength (left)	rs6802071	T	C	-0.00940386	0.00150182	3.79997e-10	4.34674e-05	20.0404
Hand grip strength (left)	rs71298370	A	G	0.0148764	0.00270414	3.79997e-08	3.48796e-05	16.0809
Hand grip strength (left)	rs13091492	G	A	-0.00847903	0.00153407	3.29997e-08	3.36217e-05	15.5009
Hand grip strength (left)	rs10934857	A	G	0.00928675	0.00170182	4.79999e-08	3.30964e-05	15.2587
Hand grip strength (left)	rs4498020	A	C	-0.0104238	0.00166995	4.30002e-10	4.34467e-05	20.0308
Hand grip strength (left)	rs4677601	G	A	0.00905884	0.001485	1.09999e-09	4.10138e-05	18.9091
Hand grip strength (left)	rs2871960	C	A	0.0120879	0.00149222	5.50047e-16	7.21644e-05	33.2719
Hand grip strength (left)	rs35609019	C	G	0.00947689	0.00154061	7.69999e-10	4.30277e-05	19.8376
Hand grip strength (left)	rs13107325	T	C	-0.0261553	0.0028208	1.80011e-20	9.48118e-05	43.7147
Hand grip strength (left)	rs56338231	G	A	-0.010847	0.00169739	1.7e-10	4.5078e-05	20.783
Hand grip strength (left)	rs13146142	C	T	-0.0202031	0.00202888	2.29985e-23	0.000108949	50.2335
Hand grip strength (left)	rs34587452	C	G	-0.0113642	0.00180741	3.2e-10	4.36179e-05	20.1098
Hand grip strength (left)	rs13106087	C	T	0.0116202	0.00197399	3.89996e-09	3.81407e-05	17.5844
Hand grip strength (left)	rs997850	C	G	-0.00887326	0.0015279	6.29999e-09	3.76399e-05	17.3535
Hand grip strength (left)	rs34722008	A	G	0.00858569	0.00155452	3.29997e-08	3.36856e-05	15.5304
Hand grip strength (left)	rs2850379	A	C	-0.00828995	0.00150007	3.29997e-08	3.37318e-05	15.5517
Hand grip strength (left)	rs75497896	C	T	-0.0206727	0.00337524	9.09997e-10	4.13722e-05	19.0744
Hand grip strength (left)	rs116409670	T	C	-0.0152418	0.00273867	2.59998e-08	3.41257e-05	15.7333
Hand grip strength (left)	rs55681913	C	T	0.0137738	0.00243658	1.6e-08	3.59852e-05	16.5906
Hand grip strength (left)	rs13356200	G	T	-0.00876765	0.0015286	9.69996e-09	3.67043e-05	16.9222
Hand grip strength (left)	rs2431112	A	G	-0.00958496	0.00149514	1.40001e-10	4.52883e-05	20.8799
Hand grip strength (left)	rs2631360	A	G	-0.0109177	0.00148434	1.9002e-13	5.95101e-05	27.4372
Hand grip strength (left)	rs6882168	T	C	-0.00935387	0.00157364	2.80001e-09	3.91219e-05	18.0368
Hand grip strength (left)	rs113918482	G	A	-0.0101011	0.00178515	1.5e-08	3.53027e-05	16.276
Hand grip strength (left)	rs2974438	A	G	-0.0100735	0.00182387	3.29997e-08	3.37901e-05	15.5786
Hand grip strength (left)	rs185320691	C	G	-0.0166866	0.00268915	5.49997e-10	5.19805e-05	23.9655
Hand grip strength (left)	rs12528131	G	A	-0.00882788	0.00148565	2.80001e-09	3.89446e-05	17.9551
Hand grip strength (left)	rs9371201	T	C	-0.00933847	0.0015738	2.99999e-09	3.8861e-05	17.9165
Hand grip strength (left)	rs77485342	T	C	0.0329675	0.00558187	3.50002e-09	3.84288e-05	17.7173
Hand grip strength (left)	rs9388769	A	G	-0.0140821	0.00158065	5.10035e-19	8.72579e-05	40.2315
Hand grip strength (left)	rs35175534	C	A	-0.0163733	0.00235477	3.59998e-12	6.45495e-05	29.7608
Hand grip strength (left)	rs113315602	C	A	-0.0181886	0.00266345	8.60003e-12	5.73394e-05	26.4363
Hand grip strength (left)	rs723588	C	T	0.0127904	0.00211948	1.6e-09	4.00033e-05	18.4432
Hand grip strength (left)	rs11243202	C	T	0.00972237	0.0014909	7.00003e-11	4.72253e-05	21.773
Hand grip strength (left)	rs4713506	A	G	-0.0157268	0.00169811	1.99986e-20	9.41208e-05	43.396
Hand grip strength (left)	rs2038760	T	C	-0.0115262	0.00198662	6.59994e-09	3.76502e-05	17.3583
Hand grip strength (left)	rs41271299	T	C	0.0211891	0.00336402	2.99999e-10	4.36545e-05	20.1266
Hand grip strength (left)	rs9371881	A	G	0.00947946	0.00154996	9.59997e-10	4.13659e-05	19.0714
Hand grip strength (left)	rs4621706	T	C	-0.0117068	0.00150003	6.00067e-15	6.79825e-05	31.3437
Hand grip strength (left)	rs11769549	A	T	0.0204956	0.00311228	4.49987e-11	4.91328e-05	22.6525
Hand grip strength (left)	rs12533765	G	A	-0.0092	0.00165199	2.59998e-08	3.41309e-05	15.7357
Hand grip strength (left)	rs16870531	T	C	0.011198	0.00174241	1.29999e-10	4.55469e-05	20.9992
Hand grip strength (left)	rs13227429	C	T	-0.00858767	0.0014977	9.80009e-09	3.6319e-05	16.7445
Hand grip strength (left)	rs6977081	T	G	0.0147525	0.00158641	1.39991e-20	9.67999e-05	44.6314
Hand grip strength (left)	rs12673062	A	G	-0.0107691	0.00180808	2.59998e-09	3.92467e-05	18.0944
Hand grip strength (left)	rs73307079	C	T	0.0111025	0.00183407	1.40001e-09	4.10592e-05	18.93
Hand grip strength (left)	rs6962338	G	A	-0.0214095	0.0036171	3.2e-09	3.85556e-05	17.7758
Hand grip strength (left)	rs17282763	C	T	0.00893956	0.00163298	4.39997e-08	3.33246e-05	15.364
Hand grip strength (left)	rs821100	G	A	-0.0101977	0.00168615	1.5e-09	4.05605e-05	18.7001
Hand grip strength (left)	rs59116179	T	C	0.00857385	0.00153635	2.39999e-08	3.47276e-05	16.0108
Hand grip strength (left)	rs4737446	T	G	0.0104178	0.00161882	1.2e-10	4.60432e-05	21.228
Hand grip strength (left)	rs1486925	C	T	-0.0104734	0.00160211	6.29941e-11	4.73055e-05	21.81
Hand grip strength (left)	rs4398863	C	G	-0.00945015	0.00168454	2e-08	3.46372e-05	15.9691
Hand grip strength (left)	rs4739739	G	A	-0.00853387	0.00150466	1.40001e-08	3.53625e-05	16.3036
Hand grip strength (left)	rs10097417	G	A	-0.0132302	0.00197055	1.9002e-11	4.96044e-05	22.8699
Hand grip strength (left)	rs7026798	C	T	0.00823598	0.00150641	4.60002e-08	3.32943e-05	15.35
Hand grip strength (left)	rs7856625	T	C	-0.0111297	0.0015209	2.49977e-13	5.8945e-05	27.1767
Hand grip strength (left)	rs16910750	C	G	0.0112498	0.00204139	3.59998e-08	3.39566e-05	15.6553
Hand grip strength (left)	rs116922558	G	A	-0.0215842	0.00385425	2.1e-08	3.57074e-05	16.4626
Hand grip strength (left)	rs2789514	A	G	0.0120546	0.00220932	4.90004e-08	3.33115e-05	15.3579
Hand grip strength (left)	rs10988217	G	A	-0.00920657	0.00152911	1.7e-09	4.0556e-05	18.698
Hand grip strength (left)	rs11002322	T	G	-0.00998924	0.00157255	2.1e-10	4.48127e-05	20.6607
Hand grip strength (left)	rs10786706	T	C	0.0100072	0.00148741	1.69981e-11	4.9837e-05	22.9772
Hand grip strength (left)	rs35236379	T	G	0.0123565	0.00212204	5.80003e-09	3.72754e-05	17.1855
Hand grip strength (left)	rs11003014	G	A	0.011433	0.00202143	1.6e-08	3.53459e-05	16.2959
Hand grip strength (left)	rs4962700	G	C	0.00904307	0.00163488	3.2e-08	3.44751e-05	15.8944
Hand grip strength (left)	rs772014	G	A	-0.0106178	0.00151891	2.70023e-12	5.3765e-05	24.7883
Hand grip strength (left)	rs10821939	A	G	-0.00935422	0.00150339	4.90004e-10	4.28094e-05	19.737
Hand grip strength (left)	rs1556659	T	C	0.0162896	0.00153452	2.49977e-26	0.000125227	57.7399
Hand grip strength (left)	rs72977282	A	T	-0.0155569	0.00151173	7.8001e-25	0.000117417	54.1383
Hand grip strength (left)	rs4930236	A	C	0.0119032	0.00202069	3.79997e-09	3.8872e-05	17.9216
Hand grip strength (left)	rs10831903	T	C	0.00928662	0.00151154	8.10009e-10	4.21082e-05	19.4137
Hand grip strength (left)	rs12790261	A	C	-0.0251882	0.00270305	1.20005e-20	9.59231e-05	44.2271
Hand grip strength (left)	rs7124681	A	C	-0.0116557	0.00150615	1e-14	6.56456e-05	30.2662
Hand grip strength (left)	rs61389091	T	C	0.0261627	0.00373295	2.39994e-12	5.47559e-05	25.2452
Hand grip strength (left)	rs34845616	A	G	0.0108395	0.00173373	4e-10	4.35453e-05	20.0763
Hand grip strength (left)	rs76895963	G	T	0.0359634	0.00574862	3.89996e-10	5.24221e-05	24.1691
Hand grip strength (left)	rs10846071	T	C	-0.016641	0.00151685	5.30029e-28	0.0001322	60.9554
Hand grip strength (left)	rs11168357	A	G	-0.00962864	0.00172661	2.5e-08	3.43935e-05	15.8568
Hand grip strength (left)	rs4575361	T	A	-0.0108028	0.00160223	1.59993e-11	5.01053e-05	23.1009
Hand grip strength (left)	rs12316046	G	A	-0.0174165	0.00152991	5.00035e-30	0.00014263	65.7653
Hand grip strength (left)	rs7970350	T	C	-0.0101345	0.00148418	8.60003e-12	5.13468e-05	23.6733
Hand grip strength (left)	rs7963801	C	T	-0.0104348	0.00150824	4.60045e-12	5.33159e-05	24.5812
Hand grip strength (left)	rs11111267	G	A	0.0108359	0.00192886	1.89998e-08	3.48205e-05	16.0536
Hand grip strength (left)	rs3118903	A	G	-0.0174477	0.00179692	2.70023e-22	0.000104325	48.1013
Hand grip strength (left)	rs56060323	T	C	0.00906905	0.00160238	1.5e-08	3.54661e-05	16.3513
Hand grip strength (left)	rs12889267	G	A	-0.0137394	0.00198726	4.70002e-12	5.25414e-05	24.2241
Hand grip strength (left)	rs7148603	A	G	0.00957206	0.00158612	1.6e-09	4.2191e-05	19.4519
Hand grip strength (left)	rs2359239	T	C	-0.00881461	0.00152153	6.90001e-09	3.70234e-05	17.0693
Hand grip strength (left)	rs10144445	G	C	-0.00936876	0.00155918	1.89998e-09	3.99432e-05	18.4155
Hand grip strength (left)	rs28542042	T	C	0.0110101	0.00162277	1.20005e-11	5.17551e-05	23.8616
Hand grip strength (left)	rs12906830	C	T	0.0108401	0.00151797	9.30037e-13	5.63534e-05	25.9817
Hand grip strength (left)	rs3959716	G	C	-0.00832523	0.0015043	3.09999e-08	3.40319e-05	15.6901
Hand grip strength (left)	rs17466480	G	A	-0.0118235	0.00152732	9.79941e-15	6.63255e-05	30.5797
Hand grip strength (left)	rs12914702	A	G	0.0109514	0.00169071	9.30037e-11	5.04098e-05	23.2413
Hand grip strength (left)	rs7176095	G	A	-0.013375	0.00222025	1.7e-09	3.99852e-05	18.4349
Hand grip strength (left)	rs2871865	G	C	-0.0217979	0.00231659	5.00035e-21	9.76275e-05	45.013
Hand grip strength (left)	rs13337177	T	G	-0.0142799	0.00193621	1.59993e-13	6.04138e-05	27.8539
Hand grip strength (left)	rs11642954	A	G	-0.0117025	0.00187683	4.49997e-10	4.29982e-05	19.824
Hand grip strength (left)	rs217181	T	C	0.0119554	0.00188145	2.1e-10	4.45387e-05	20.5343
Hand grip strength (left)	rs9944324	G	A	-0.00855272	0.00150169	1.2e-08	3.63005e-05	16.736
Hand grip strength (left)	rs7197751	T	G	-0.00946321	0.00156268	1.40001e-09	4.14155e-05	19.0943
Hand grip strength (left)	rs7196917	G	A	-0.0117302	0.00150067	5.40008e-15	6.74483e-05	31.0974
Hand grip strength (left)	rs181766	C	T	0.00963247	0.00160372	1.89998e-09	4.0499e-05	18.6718
Hand grip strength (left)	rs3814877	T	G	0.0105385	0.00151385	3.40017e-12	5.3379e-05	24.6103
Hand grip strength (left)	rs11076004	A	G	-0.0115356	0.00150909	2.09991e-14	6.47532e-05	29.8547
Hand grip strength (left)	rs113434679	A	C	-0.0149156	0.00187618	1.9002e-15	7.1079e-05	32.7715
Hand grip strength (left)	rs755547	A	G	0.0165156	0.00189766	3.19963e-18	8.35864e-05	38.5386
Hand grip strength (left)	rs2532111	G	A	0.0102852	0.00155794	4.10015e-11	4.8773e-05	22.4866
Hand grip strength (left)	rs999493	A	G	0.0128713	0.00153936	6.20012e-17	7.79099e-05	35.9211
Hand grip strength (left)	rs2587505	C	T	-0.00900424	0.00150694	2.30001e-09	3.9497e-05	18.2098
Hand grip strength (left)	rs635538	A	G	-0.0216569	0.00265852	3.80014e-16	7.38481e-05	34.0482
Hand grip strength (left)	rs4308051	G	T	0.0159929	0.00181863	1.39991e-18	8.51306e-05	39.2506
Hand grip strength (left)	rs62081464	T	C	-0.0098827	0.00177979	2.80001e-08	3.43117e-05	15.8191
Hand grip strength (left)	rs143002906	T	C	0.0262281	0.00457421	9.80009e-09	3.72224e-05	17.161
Hand grip strength (left)	rs35054365	A	T	0.0128072	0.00149718	1.20005e-17	8.07366e-05	37.2245
Hand grip strength (left)	rs10403906	A	G	-0.0100323	0.00148665	1.50003e-11	5.02112e-05	23.1497
Hand grip strength (left)	rs11669079	T	A	0.0109542	0.00163169	1.9002e-11	4.99092e-05	23.0105
Hand grip strength (left)	rs8101782	C	A	0.00955082	0.00172167	2.90001e-08	3.81131e-05	17.5717
Hand grip strength (left)	rs8108461	C	T	0.00952393	0.0015066	2.59998e-10	4.43918e-05	20.4666
Hand grip strength (left)	rs143384	G	A	0.0209202	0.00151159	1.50003e-43	0.000210826	97.2162
Hand grip strength (left)	rs4811040	G	C	-0.00924973	0.00166896	2.99999e-08	3.42416e-05	15.7867
Hand grip strength (left)	rs9611273	T	C	0.0107888	0.00173048	4.49997e-10	4.39585e-05	20.2668
Hand grip strength (left)	rs6006984	C	T	0.00984917	0.00165413	2.59998e-09	3.8921e-05	17.9442
Hand grip strength (right)	rs58670122	G	A	-0.0132234	0.00214787	7.39997e-10	4.28981e-05	19.7806
Hand grip strength (right)	rs10798876	G	C	0.00879466	0.00149794	4.30002e-09	3.82501e-05	17.6373
Hand grip strength (right)	rs10798483	A	G	0.0145083	0.00149469	2.80027e-22	0.000104304	48.0982
Hand grip strength (right)	rs6693965	T	G	-0.016251	0.00223033	3.19963e-13	5.89662e-05	27.1902
Hand grip strength (right)	rs4927015	A	G	0.013059	0.00150895	5.00035e-18	8.29271e-05	38.2398
Hand grip strength (right)	rs1952256	G	A	0.00976791	0.00156323	4.09996e-10	4.31228e-05	19.8842
Hand grip strength (right)	rs35304341	A	G	-0.0142862	0.00260278	4e-08	3.3262e-05	15.3372
Hand grip strength (right)	rs823130	T	C	-0.0123872	0.00150332	1.69981e-16	7.53385e-05	34.7402
Hand grip strength (right)	rs56144131	C	T	-0.01307	0.00208666	3.79997e-10	4.34033e-05	20.0136
Hand grip strength (right)	rs7549184	A	G	0.01056	0.00181367	5.80003e-09	3.73439e-05	17.2194
Hand grip strength (right)	rs10799428	T	C	-0.0143588	0.00190367	4.60045e-14	6.27442e-05	28.9324
Hand grip strength (right)	rs12562146	A	T	0.0118706	0.00211554	2e-08	3.49701e-05	16.1248
Hand grip strength (right)	rs2147461	C	T	0.0134299	0.00231042	6.1e-09	3.73425e-05	17.2188
Hand grip strength (right)	rs4121165	A	G	-0.0119792	0.00182142	4.79954e-11	4.78553e-05	22.0665
Hand grip strength (right)	rs6693567	T	C	-0.00974656	0.00167765	6.29999e-09	3.71805e-05	17.1441
Hand grip strength (right)	rs1892425	A	G	0.0113357	0.00175726	1.09999e-10	4.66927e-05	21.5304
Hand grip strength (right)	rs150330307	C	T	-0.0325831	0.00422401	1.20005e-14	6.55234e-05	30.214
Hand grip strength (right)	rs1550115	T	C	0.0152836	0.00171276	4.49987e-19	8.79308e-05	40.5473
Hand grip strength (right)	rs1442883	A	C	-0.0106189	0.00171426	5.80003e-10	4.26291e-05	19.6566
Hand grip strength (right)	rs6711390	T	C	0.0132663	0.00152876	4.00037e-18	8.21463e-05	37.8797
Hand grip strength (right)	rs35833641	G	A	0.00922306	0.00160181	8.50002e-09	3.65442e-05	16.8507
Hand grip strength (right)	rs1840753	T	C	0.0176942	0.00312088	1.40001e-08	3.68523e-05	16.9927
Hand grip strength (right)	rs1047891	A	C	0.0096867	0.0015965	1.29999e-09	4.05468e-05	18.6963
Hand grip strength (right)	rs2894602	G	A	0.0101332	0.00176778	9.90011e-09	3.67991e-05	16.9682
Hand grip strength (right)	rs7565148	G	T	-0.0103511	0.00148921	3.59998e-12	5.35725e-05	24.7029
Hand grip strength (right)	rs7576964	T	G	0.00974539	0.00156908	5.30005e-10	4.27476e-05	19.7112
Hand grip strength (right)	rs34030812	C	T	-0.00912858	0.00154266	3.29997e-09	3.87338e-05	17.8603
Hand grip strength (right)	rs7575451	G	C	-0.0106047	0.00155571	9.30037e-12	5.11826e-05	23.6008
Hand grip strength (right)	rs12616285	G	T	0.0122195	0.00209396	5.39995e-09	3.77839e-05	17.4223
Hand grip strength (right)	rs6715064	T	C	-0.00921128	0.00160563	9.59997e-09	3.63239e-05	16.7491
Hand grip strength (right)	rs1641457	G	T	0.0130726	0.00178536	2.39994e-13	5.92834e-05	27.3364
Hand grip strength (right)	rs3771498	T	C	0.0141605	0.00148856	1.9002e-21	0.000100179	46.196
Hand grip strength (right)	rs12052508	T	C	-0.0133517	0.00227992	4.70002e-09	3.79089e-05	17.48
Hand grip strength (right)	rs10193039	T	A	-0.0103284	0.00165217	4.09996e-10	4.30651e-05	19.8576
Hand grip strength (right)	rs2194747	G	A	0.00985126	0.00163925	1.89998e-09	4.02058e-05	18.5391
Hand grip strength (right)	rs6792762	A	G	-0.00911683	0.0015155	1.79999e-09	4.04811e-05	18.6661
Hand grip strength (right)	rs7652177	G	C	0.00858128	0.00148684	7.90005e-09	3.68159e-05	16.976
Hand grip strength (right)	rs2194411	A	G	0.0142831	0.00224795	2.1e-10	4.56756e-05	21.0614
Hand grip strength (right)	rs1440152	G	C	0.00827068	0.00149983	3.50002e-08	3.37816e-05	15.5768
Hand grip strength (right)	rs2362972	A	C	-0.00856859	0.00150767	1.29999e-08	3.58192e-05	16.5164
Hand grip strength (right)	rs62234790	A	C	0.0105846	0.0017265	8.79995e-10	4.154e-05	19.1543
Hand grip strength (right)	rs35701422	C	T	-0.00869121	0.00153481	1.5e-08	3.53794e-05	16.3135
Hand grip strength (right)	rs2341184	C	T	0.0100606	0.00167125	1.7e-09	4.00614e-05	18.4725
Hand grip strength (right)	rs35457492	C	A	0.00833889	0.00149104	2.19999e-08	3.47656e-05	16.0305
Hand grip strength (right)	rs9757079	T	C	0.00980223	0.00159699	8.40001e-10	4.16975e-05	19.227
Hand grip strength (right)	rs71298370	A	G	0.0165994	0.00270846	8.9e-10	4.34161e-05	20.0195
Hand grip strength (right)	rs9853018	T	C	0.0101977	0.00149426	8.80035e-12	5.13267e-05	23.6673
Hand grip strength (right)	rs34587452	C	G	-0.0110867	0.00181019	9.09997e-10	4.15153e-05	19.143
Hand grip strength (right)	rs7657558	G	T	0.0107255	0.00166228	1.09999e-10	4.64234e-05	21.4062
Hand grip strength (right)	rs114924396	G	A	-0.0191251	0.00331785	8.19993e-09	3.71284e-05	17.1201
Hand grip strength (right)	rs13146142	C	T	-0.0207968	0.00203165	1.39991e-24	0.000115449	53.238
Hand grip strength (right)	rs13106087	C	T	0.0129259	0.001977	6.20012e-11	4.71878e-05	21.7587
Hand grip strength (right)	rs997850	C	G	-0.0090224	0.00153019	3.69999e-09	3.89161e-05	17.9444
Hand grip strength (right)	rs13107325	T	C	-0.0275	0.00282478	2.09991e-22	0.000104806	48.3299
Hand grip strength (right)	rs13169333	C	T	0.00929083	0.00169626	4.30002e-08	3.32405e-05	15.3273
Hand grip strength (right)	rs75457267	T	C	-0.0187295	0.00339456	3.40001e-08	3.40947e-05	15.7212
Hand grip strength (right)	rs12522139	G	T	-0.0114381	0.00197332	6.80002e-09	3.71175e-05	17.115
Hand grip strength (right)	rs6882168	T	C	-0.00909312	0.00157605	7.90005e-09	3.69695e-05	17.0468
Hand grip strength (right)	rs13356200	G	T	-0.00920983	0.00153092	1.79999e-09	4.04976e-05	18.6737
Hand grip strength (right)	rs6870324	G	C	-0.00998568	0.00168316	2.99999e-09	3.92772e-05	18.1109
Hand grip strength (right)	rs13355365	T	C	-0.00846604	0.00153398	3.40001e-08	3.3757e-05	15.5654
Hand grip strength (right)	rs4868110	T	A	-0.00971069	0.00158981	1e-09	4.12513e-05	19.0212
Hand grip strength (right)	rs2431112	A	G	-0.011172	0.00149737	8.60003e-14	6.15273e-05	28.3712
Hand grip strength (right)	rs2631360	A	G	-0.0111803	0.00148648	5.40008e-14	6.24075e-05	28.7771
Hand grip strength (right)	rs2322754	A	G	-0.0117022	0.00198538	3.79997e-09	3.83475e-05	17.6822
Hand grip strength (right)	rs9322822	T	C	0.0110799	0.00159266	3.50026e-12	5.34431e-05	24.6433
Hand grip strength (right)	rs9388051	A	G	0.0106262	0.0019116	2.69998e-08	3.41991e-05	15.7693
Hand grip strength (right)	rs7451021	C	T	-0.0157967	0.00160573	7.70016e-23	0.000106851	49.2729
Hand grip strength (right)	rs113835839	T	C	-0.00986353	0.00172486	1.09999e-08	3.62754e-05	16.7267
Hand grip strength (right)	rs11243202	C	T	0.0116378	0.00149304	6.4998e-15	6.76662e-05	31.2021
Hand grip strength (right)	rs645144	C	T	-0.00868793	0.00158627	4.30002e-08	3.33771e-05	15.3903
Hand grip strength (right)	rs721101	C	T	0.00946697	0.0016742	1.6e-08	3.54314e-05	16.3375
Hand grip strength (right)	rs77485342	T	C	0.0353373	0.0055898	2.59998e-10	4.41642e-05	20.3644
Hand grip strength (right)	rs9267806	A	G	-0.0167434	0.00170197	7.70016e-23	0.000106744	49.2235
Hand grip strength (right)	rs185320691	C	G	-0.020249	0.00269349	5.60015e-14	7.65273e-05	35.2885
Hand grip strength (right)	rs113315602	C	A	-0.0212911	0.00266761	1.39991e-15	7.85528e-05	36.2225
Hand grip strength (right)	rs1125	A	G	-0.0100304	0.00157472	1.89998e-10	4.4929e-05	20.7171
Hand grip strength (right)	rs9396861	A	C	-0.00962972	0.00155347	5.69994e-10	4.45517e-05	20.5431
Hand grip strength (right)	rs35175534	C	A	-0.0191822	0.00235828	4.19952e-16	8.85918e-05	40.8522
Hand grip strength (right)	rs1885690	A	C	-0.00839964	0.00151212	2.80001e-08	3.41433e-05	15.7435
Hand grip strength (right)	rs852520	A	C	-0.00890306	0.00157301	1.5e-08	3.54471e-05	16.3448
Hand grip strength (right)	rs4549685	T	C	0.00971494	0.00158124	8.10009e-10	4.17295e-05	19.2417
Hand grip strength (right)	rs112330055	A	G	0.0179824	0.00319007	1.7e-08	3.81615e-05	17.5964
Hand grip strength (right)	rs7790322	T	C	-0.00860301	0.0015092	1.2e-08	3.59519e-05	16.5776
Hand grip strength (right)	rs6962338	G	A	-0.0203488	0.00362338	2e-08	3.48133e-05	16.0525
Hand grip strength (right)	rs6977081	T	G	0.01286	0.00158867	5.70033e-16	7.35554e-05	33.9179
Hand grip strength (right)	rs2389763	C	T	-0.00832615	0.00151353	3.79997e-08	3.34927e-05	15.4436
Hand grip strength (right)	rs2717351	G	A	0.0127695	0.00183473	3.40017e-12	5.44396e-05	25.1027
Hand grip strength (right)	rs9639938	G	C	0.00873031	0.0014948	5.19996e-09	3.78563e-05	17.4557
Hand grip strength (right)	rs10278546	C	A	0.0107539	0.00188373	1.09999e-08	3.62655e-05	16.7222
Hand grip strength (right)	rs4730984	T	G	0.0104789	0.00174245	1.79999e-09	4.00081e-05	18.448
Hand grip strength (right)	rs4737446	T	G	0.0102668	0.00162131	2.39999e-10	4.47152e-05	20.6185
Hand grip strength (right)	rs62509875	G	A	-0.0131798	0.00197325	2.39994e-11	4.92379e-05	22.7041
Hand grip strength (right)	rs1486925	C	T	-0.0095288	0.00160467	2.90001e-09	3.91603e-05	18.057
Hand grip strength (right)	rs6473015	C	A	0.00959961	0.00164629	5.49997e-09	3.76089e-05	17.3416
Hand grip strength (right)	rs7871404	G	A	0.0119345	0.00190074	3.40001e-10	4.36024e-05	20.1054
Hand grip strength (right)	rs116922558	G	A	-0.0246271	0.00386049	1.79999e-10	4.64749e-05	21.43
Hand grip strength (right)	rs2208562	T	C	-0.0115616	0.00152246	3.10027e-14	6.36224e-05	29.3373
Hand grip strength (right)	rs7034200	A	C	0.00868874	0.00148875	5.30005e-09	3.76876e-05	17.3779
Hand grip strength (right)	rs113851275	A	G	0.0131425	0.00239826	4.30002e-08	3.31699e-05	15.2947
Hand grip strength (right)	rs11998884	T	C	0.0173433	0.0031243	2.80001e-08	3.48933e-05	16.0894
Hand grip strength (right)	rs600038	C	T	-0.0103761	0.00183358	1.5e-08	3.53537e-05	16.3017
Hand grip strength (right)	rs10761411	T	C	-0.0114975	0.00202082	1.29999e-08	4.02908e-05	18.5783
Hand grip strength (right)	rs72820369	T	A	0.0161266	0.00232961	4.40048e-12	5.39912e-05	24.896
Hand grip strength (right)	rs4751671	A	G	0.0082332	0.00150019	4.09996e-08	3.37648e-05	15.569
Hand grip strength (right)	rs4752689	A	G	0.0087531	0.00150761	6.4e-09	3.72208e-05	17.1627
Hand grip strength (right)	rs12412806	A	G	-0.00909582	0.00164139	2.99999e-08	3.43598e-05	15.8434
Hand grip strength (right)	rs2273555	A	G	0.0110316	0.00152155	4.19952e-13	5.81079e-05	26.7943
Hand grip strength (right)	rs4962700	G	C	0.00932733	0.00163735	1.2e-08	3.66793e-05	16.913
Hand grip strength (right)	rs1556659	T	C	0.0175345	0.00153689	3.80014e-30	0.000145099	66.913
Hand grip strength (right)	rs12763284	G	A	0.00959741	0.00148928	1.2e-10	4.58428e-05	21.1385
Hand grip strength (right)	rs11022513	T	C	-0.00921054	0.00151016	1.09999e-09	4.16019e-05	19.1829
Hand grip strength (right)	rs11039348	A	G	-0.00976855	0.00156104	3.89996e-10	4.33239e-05	19.977
Hand grip strength (right)	rs2244621	T	C	0.0115957	0.00211936	4.49997e-08	3.31783e-05	15.2986
Hand grip strength (right)	rs61389091	T	C	0.0220553	0.00373782	3.59998e-09	3.89234e-05	17.9478
Hand grip strength (right)	rs34845616	A	G	0.00979506	0.00173626	1.7e-08	3.55574e-05	16.3956
Hand grip strength (right)	rs12790261	A	C	-0.0263714	0.00270734	1.99986e-22	0.00010514	48.4836
Hand grip strength (right)	rs72977282	A	T	-0.016811	0.00151401	1.20005e-28	0.000137116	63.2309
Hand grip strength (right)	rs6592737	T	A	-0.00924791	0.00154126	2e-09	3.99393e-05	18.4162
Hand grip strength (right)	rs10770125	G	A	0.00844132	0.00148775	1.40001e-08	3.5553e-05	16.3936
Hand grip strength (right)	rs1635527	C	G	0.00975325	0.001495	6.79986e-11	4.71339e-05	21.7339
Hand grip strength (right)	rs76895963	G	T	0.0359771	0.00575693	4.09996e-10	5.2467e-05	24.1931
Hand grip strength (right)	rs7301953	A	G	-0.0115397	0.00160449	6.4003e-13	5.7196e-05	26.3738
Hand grip strength (right)	rs10846071	T	C	-0.0156575	0.00151902	6.4998e-25	0.000117037	53.9704
Hand grip strength (right)	rs12823922	G	A	-0.0114203	0.00178649	1.6e-10	4.5079e-05	20.7863
Hand grip strength (right)	rs10784502	T	C	-0.0111247	0.00148608	7.10068e-14	6.18425e-05	28.5165
Hand grip strength (right)	rs7963801	C	T	-0.0112734	0.00151048	8.4004e-14	6.22277e-05	28.6942
Hand grip strength (right)	rs12316046	G	A	-0.0162046	0.00153212	3.80014e-26	0.000123473	56.9386
Hand grip strength (right)	rs4768725	C	T	0.00905894	0.00162081	2.30001e-08	3.44935e-05	15.905
Hand grip strength (right)	rs7953280	C	G	-0.00898631	0.00149436	1.79999e-09	4.03691e-05	18.6144
Hand grip strength (right)	rs3118914	T	G	-0.0194408	0.00180843	5.90065e-27	0.000127577	58.8316
Hand grip strength (right)	rs2296316	C	T	-0.00821333	0.00150213	4.60002e-08	3.35584e-05	15.4739
Hand grip strength (right)	rs12889267	G	A	-0.0122874	0.0019904	6.69993e-10	4.20157e-05	19.3737
Hand grip strength (right)	rs935728	T	C	0.00955337	0.0015872	1.79999e-09	4.02085e-05	18.5403
Hand grip strength (right)	rs7148603	A	G	0.00930613	0.00158837	4.70002e-09	3.98807e-05	18.3892
Hand grip strength (right)	rs10483727	C	T	-0.00901803	0.00152456	3.29997e-09	3.86894e-05	17.8399
Hand grip strength (right)	rs9652468	A	G	-0.0125308	0.00172118	3.29989e-13	5.87821e-05	27.1052
Hand grip strength (right)	rs2871865	G	C	-0.0236863	0.00232022	1.80011e-24	0.00011525	53.1463
Hand grip strength (right)	rs2165241	C	T	0.0122486	0.00148844	1.9002e-16	7.49906e-05	34.5798
Hand grip strength (right)	rs4553566	C	T	-0.00930181	0.00149229	4.60002e-10	4.2884e-05	19.7741
Hand grip strength (right)	rs12914702	A	G	0.0107788	0.00169282	1.89998e-10	4.88373e-05	22.5194
Hand grip strength (right)	rs12101479	C	G	-0.0106133	0.0017554	1.5e-09	4.07673e-05	18.798
Hand grip strength (right)	rs12899474	T	C	-0.0148939	0.00239936	5.39995e-10	4.27627e-05	19.7182
Hand grip strength (right)	rs246181	T	C	0.00970432	0.00154856	3.69999e-10	4.40695e-05	20.3208
Hand grip strength (right)	rs11642954	A	G	-0.0131918	0.00187938	2.19989e-12	5.4643e-05	25.1965
Hand grip strength (right)	rs7196917	G	A	-0.010582	0.00150287	1.9002e-12	5.48898e-05	25.3104
Hand grip strength (right)	rs8055199	A	G	-0.00896262	0.00157271	1.2e-08	3.60451e-05	16.6205
Hand grip strength (right)	rs7206195	T	C	-0.0153211	0.00193924	2.80027e-15	6.94061e-05	32.0045
Hand grip strength (right)	rs248831	A	G	0.00988989	0.00171686	8.40001e-09	3.81257e-05	17.5799
Hand grip strength (right)	rs62037412	A	G	0.00932966	0.0015542	1.89998e-09	3.99756e-05	18.433
Hand grip strength (right)	rs4785574	G	A	-0.0103769	0.00149954	4.49987e-12	5.31807e-05	24.5223
Hand grip strength (right)	rs3848369	T	C	-0.00953776	0.00153126	4.70002e-10	4.31436e-05	19.8938
Hand grip strength (right)	rs76749769	T	C	0.0144315	0.00257957	2.19999e-08	3.45233e-05	15.9188
Hand grip strength (right)	rs4784329	C	A	-0.0133357	0.00150734	8.99912e-19	8.69977e-05	40.117
Hand grip strength (right)	rs7214252	A	G	-0.0102442	0.00182532	2e-08	3.49541e-05	16.1174
Hand grip strength (right)	rs2854152	G	A	0.010991	0.00159765	6.00067e-12	5.27232e-05	24.3112
Hand grip strength (right)	rs1043515	G	A	0.0138281	0.00149848	2.80027e-20	9.3933e-05	43.3154
Hand grip strength (right)	rs12452505	G	C	-0.0144313	0.00213545	1.39991e-11	5.08416e-05	23.4436
Hand grip strength (right)	rs2587505	C	T	-0.0092717	0.0015091	8.10009e-10	4.1877e-05	19.3097
Hand grip strength (right)	rs4793658	C	A	-0.0136707	0.00248614	3.79997e-08	3.6702e-05	16.9234
Hand grip strength (right)	rs56074046	A	G	-0.00903502	0.00153954	4.39997e-09	3.81303e-05	17.5821
Hand grip strength (right)	rs56365901	G	A	-0.0142618	0.00179293	1.80011e-15	7.0415e-05	32.4697
Hand grip strength (right)	rs10520770	C	T	0.011742	0.00149773	4.49987e-15	6.82282e-05	31.4613
Hand grip strength (right)	rs635538	A	G	-0.0219943	0.00266274	1.50003e-16	7.6155e-05	35.1167
Hand grip strength (right)	rs4369779	C	T	0.017203	0.00182068	3.40017e-21	9.85315e-05	45.4361
Hand grip strength (right)	rs34217742	A	T	0.0146245	0.00227778	1.40001e-10	4.65555e-05	21.4671
Hand grip strength (right)	rs7249	T	C	0.00848186	0.00154442	4e-08	3.33857e-05	15.3942
Hand grip strength (right)	rs4802848	C	G	0.0110767	0.00167496	3.80014e-11	4.83362e-05	22.2883
Hand grip strength (right)	rs36065733	G	T	0.00971991	0.00149596	8.19974e-11	4.70963e-05	21.7165
Hand grip strength (right)	rs79723785	C	T	-0.0340504	0.00602877	1.6e-08	3.76187e-05	17.3461
Hand grip strength (right)	rs7266065	A	G	0.00993881	0.00159481	4.60002e-10	4.31994e-05	19.9195
Hand grip strength (right)	rs911642	T	C	0.00862996	0.00153783	2e-08	3.49384e-05	16.1102
Hand grip strength (right)	rs6063504	G	C	0.00862345	0.0014938	7.79992e-09	3.7174e-05	17.1411
Hand grip strength (right)	rs143384	G	A	0.0230423	0.00151366	2.49977e-52	0.000255767	117.961
Hand grip strength (right)	rs2226685	C	T	0.0103333	0.00174324	3.09999e-09	3.90967e-05	18.0277
Hand grip strength (right)	rs6006984	C	T	0.0102987	0.00165665	5.1e-10	4.25551e-05	19.6224
Note: Beta: Estimate coefficient; P-value: P-value from GWAS; SE: standard error of coefficient estimate, R2: the variance of exposure
