# Supplementary material for: Causal associations between common musculoskeletal disorders and dementia: a Mendelian randomization study
Source: Front Aging Neurosci. 2023 Dec 6;15:1253791. doi: 10.3389/fnagi.2023.1253791 (PMC10731015; doi:10.3389/fnagi.2023.1253791)
Supplement: Supplementary file 3 [file Table_3.XLSX]

## Sheet: Supplementary Table S3
Supplementary Table S3: SNPs screened out by PhenoScannerV2.
Exposure	SNPs	Pos (hg19):	Effect allele	Other allele	Trait
All Osteoarthritis	rs13107325	chr4:103188709	T	C	Fluid intelligence score
All Osteoarthritis	rs34811474	chr4:25408838	A	G	Fluid intelligence score
Hip Osteoarthritis	rs2268023	chr3:52819327	T	A	Schizophrenia
Hip Osteoarthritis	rs12209223	chr6:76164589	A	C	Illnesses of father: alzheimers disease or dementia
Hip Osteoarthritis	rs6855246	chr4:103112470	A	G	Fluid intelligence score
KneeHipOsteoarthritis	rs13107325	chr4:103188709	T	C	Fluid intelligence score
KneeHipOsteoarthritis	rs1546737	chr3:52407041	T	C	Schizophrenia
KneeHipOsteoarthritis	rs7005884	chr8:10796472	A	G	Suffer from nerves
KneeHipOsteoarthritis	rs4548913	chr17:2209888	A	G	Schizophrenia
Spine Osteoarthritis	rs13100903	chr3:50174572	C	T	Fluid intelligence score
Ankylosing spondylitis	rs56179532	chr19:32879138	G	T	Cause of death: parkinsons disease
Ankylosing spondylitis	rs16957279	chr15:33954227	A	G	Self-reported schizophrenia
Ankylosing spondylitis	rs3998320	chr6：31360059	A	G	Self-reported parkinsons disease
Ankylosing spondylitis	rs182558934	chr3：154070633	G	T	Self-reported parkinsons disease
Osteomalacia	rs72992394	chr19:11909091	C	T	Other symptoms and signs involving cognitive functions and awareness
Juvenile idiopathic arthritis	rs113140854	chr6:32634588	C	T	Schizoaffective disorders
Lateral epicondylitis	rs3132942	chr6:32176512	A	G	Illnesses of siblings: alzheimers disease or dementia
Meniscus derangement	rs1716169	chr12:123716930	T	A	Fluid intelligence score
Meniscus derangement	rs4523957	chr17:2208899	G	T	Schizophrenia
Lateral epicondylitis	rs3132942	chr6:32176512	A	G	Other symptoms and signs involving cognitive functions and awareness
Rheumatoid arthritis	rs35511257	chr6:32545392	C	G	Other symptoms and signs involving cognitive functions and awareness
Usual walking pace	rs10750025	chr11:113424042	C	T	Schizophrenia
Usual walking pace	rs13107325	chr4:103188709	T	C	Schizophrenia
Usual walking pace	rs12883788	chr14:33303540	C	T	Fluid intelligence score
Usual walking pace	rs13107325	chr4:103188709	T	C	Intelligence
Usual walking pace	rs2280406	chr3:49941436	G	A	Fluid intelligence score
Hand grip strength (left)	rs13107325	chr4:103188709	T	C	Schizophrenia
Hand grip strength (left)	rs6680160	chr1:32072737	A	G	Fluid intelligence score
Hand grip strength (left)	rs7963801	chr12:4384844	G	T	Fluid intelligence score
Hand grip strength (right)	rs13107325	chr4:103188709	T	C	Schizophrenia
Seropositive rheumatoid arthritis, wide	rs9268145	chr6:32257284	G	T	Parkinsons disease
