# Supplementary material for: Causal associations between common musculoskeletal disorders and dementia: a Mendelian randomization study
Source: Front Aging Neurosci. 2023 Dec 6;15:1253791. doi: 10.3389/fnagi.2023.1253791 (PMC10731015; doi:10.3389/fnagi.2023.1253791)
Supplement: Supplementary file 4 [file Table_4.XLSX]

## Sheet: Supplementary Table S4
Supplementary Table S4: Detailed information on instrumental variables used in MR analyses.
Exposure	Outcome	SNP	Effect allele	Other allele	Exposure			Outcome
					Beta	SE	P-value	Beta	SE	P-value
All Osteoarthritis	Dementia with Lewy bodies	rs10405617	A	G	0.0316	0.00487842	9.325e-11	-0.00309478	0.0392638	0.937172
All Osteoarthritis	Dementia with Lewy bodies	rs10831476	A	C	0.0334	0.00578507	7.765e-09	0.0288471	0.0473585	0.542437
All Osteoarthritis	Dementia with Lewy bodies	rs10953758	A	G	0.0274	0.00453813	1.563e-09	-0.0275171	0.0368061	0.454689
All Osteoarthritis	Dementia with Lewy bodies	rs11726937	A	G	-0.0313	0.00529855	3.478e-09	0.00497759	0.0427283	0.907222
All Osteoarthritis	Dementia with Lewy bodies	rs11731421	A	G	0.0306	0.00480283	1.875e-10	0.0381528	0.0395512	0.334686
All Osteoarthritis	Dementia with Lewy bodies	rs11749736	T	C	-0.0293	0.00517577	1.505e-08	-0.0131432	0.0417451	0.752879
All Osteoarthritis	Dementia with Lewy bodies	rs1401795	A	G	0.0266	0.00457714	6.192e-09	0.00650877	0.036935	0.860208
All Osteoarthritis	Dementia with Lewy bodies	rs17677555	C	G	0.0299	0.00523283	1.104e-08	-0.00182867	0.0427587	0.965883
All Osteoarthritis	Dementia with Lewy bodies	rs1913707	A	G	0.0328	0.0046296	1.392e-12	0.00605731	0.0386237	0.875377
All Osteoarthritis	Dementia with Lewy bodies	rs216175	A	C	0.0423	0.00605098	2.737e-12	0.0538386	0.0494282	0.276054
All Osteoarthritis	Dementia with Lewy bodies	rs2425061	A	G	0.0329	0.0046832	2.139e-12	-0.0293355	0.0383275	0.444006
All Osteoarthritis	Dementia with Lewy bodies	rs2622873	T	C	0.0458	0.00694412	4.238e-11	0.0179736	0.0554586	0.74587
All Osteoarthritis	Dementia with Lewy bodies	rs2820444	A	G	0.028	0.00492803	1.333e-08	-0.057894	0.0413857	0.16185
All Osteoarthritis	Dementia with Lewy bodies	rs2856821	T	C	0.0321	0.00586052	4.318e-08	0.0186916	0.0453916	0.680495
All Osteoarthritis	Dementia with Lewy bodies	rs3771501	A	G	0.0357	0.00454578	4.048e-15	0.0158241	0.0368128	0.667317
All Osteoarthritis	Dementia with Lewy bodies	rs4671010	A	C	0.0258	0.00452788	1.212e-08	-0.00996023	0.0370859	0.788214
All Osteoarthritis	Dementia with Lewy bodies	rs471464	A	C	0.031	0.00557162	2.638e-08	-0.00391234	0.0379102	0.917728
All Osteoarthritis	Dementia with Lewy bodies	rs4714791	T	G	-0.0252	0.00457357	3.59e-08	0.00269636	0.0372936	0.942432
All Osteoarthritis	Dementia with Lewy bodies	rs476330	T	C	0.0251	0.00458885	4.506e-08	-0.0439499	0.0371901	0.237285
All Osteoarthritis	Dementia with Lewy bodies	rs55872725	T	C	0.0256	0.00459312	2.496e-08	0.0173585	0.0376081	0.644381
All Osteoarthritis	Dementia with Lewy bodies	rs62182810	A	G	0.027	0.00458257	3.818e-09	-0.00595225	0.0373617	0.873501
All Osteoarthritis	Dementia with Lewy bodies	rs62242105	A	G	-0.0289	0.00486894	2.928e-09	-0.0211348	0.0403229	0.600183
All Osteoarthritis	Dementia with Lewy bodies	rs62262106	A	G	-0.0296	0.00528009	2.071e-08	-0.0798365	0.0433042	0.0652304
All Osteoarthritis	Dementia with Lewy bodies	rs75621460	A	G	0.0963	0.0157882	1.064e-09	0.0823907	0.107523	0.443516
All Osteoarthritis	Dementia with Lewy bodies	rs858936	T	C	-0.0378	0.00692658	4.836e-08	-0.108854	0.0562905	0.05313
All Osteoarthritis	Dementia with Lewy bodies	rs9445214	T	G	-0.025	0.004556	4.082e-08	0.0498207	0.0372806	0.181431
All Osteoarthritis	Dementia in Alzheimer disease	rs10405617	A	G	0.0316	0.00487842	9.325e-11	-0.0481101	0.025308	0.0573047
All Osteoarthritis	Dementia in Alzheimer disease	rs10831476	A	C	0.0334	0.00578507	7.765e-09	0.0429325	0.031426	0.171894
All Osteoarthritis	Dementia in Alzheimer disease	rs10953758	A	G	0.0274	0.00453813	1.563e-09	-0.00270521	0.0228138	0.90561
All Osteoarthritis	Dementia in Alzheimer disease	rs11726937	A	G	-0.0313	0.00529855	3.478e-09	0.00668403	0.0291466	0.818617
All Osteoarthritis	Dementia in Alzheimer disease	rs11731421	A	G	0.0306	0.00480283	1.875e-10	0.00662039	0.0230001	0.773469
All Osteoarthritis	Dementia in Alzheimer disease	rs11749736	T	C	-0.0293	0.00517577	1.505e-08	-0.000458735	0.027368	0.986627
All Osteoarthritis	Dementia in Alzheimer disease	rs1401795	A	G	0.0266	0.00457714	6.192e-09	-0.0219731	0.0230732	0.340934
All Osteoarthritis	Dementia in Alzheimer disease	rs17677555	C	G	0.0299	0.00523283	1.104e-08	0.0151065	0.0293412	0.606653
All Osteoarthritis	Dementia in Alzheimer disease	rs1913707	A	G	0.0328	0.0046296	1.392e-12	-0.039662	0.0232305	0.0877607
All Osteoarthritis	Dementia in Alzheimer disease	rs216175	A	C	0.0423	0.00605098	2.737e-12	-0.0698005	0.0315165	0.0267787
All Osteoarthritis	Dementia in Alzheimer disease	rs2425061	A	G	0.0329	0.0046832	2.139e-12	0.00550562	0.022885	0.809882
All Osteoarthritis	Dementia in Alzheimer disease	rs2622873	T	C	0.0458	0.00694412	4.238e-11	0.0380338	0.0371804	0.30633
All Osteoarthritis	Dementia in Alzheimer disease	rs2820444	A	G	0.028	0.00492803	1.333e-08	-0.0532954	0.0249402	0.0326039
All Osteoarthritis	Dementia in Alzheimer disease	rs2856821	T	C	0.0321	0.00586052	4.318e-08	0.0157546	0.0307178	0.608034
All Osteoarthritis	Dementia in Alzheimer disease	rs3771501	A	G	0.0357	0.00454578	4.048e-15	-0.0092294	0.0229934	0.688131
All Osteoarthritis	Dementia in Alzheimer disease	rs4671010	A	C	0.0258	0.00452788	1.212e-08	-0.0300687	0.0228664	0.18852
All Osteoarthritis	Dementia in Alzheimer disease	rs471464	A	C	0.031	0.00557162	2.638e-08	-0.00492552	0.0231892	0.83179
All Osteoarthritis	Dementia in Alzheimer disease	rs4714791	T	G	-0.0252	0.00457357	3.59e-08	-0.0052582	0.0228021	0.817624
All Osteoarthritis	Dementia in Alzheimer disease	rs476330	T	C	0.0251	0.00458885	4.506e-08	0.000487362	0.0233036	0.983315
All Osteoarthritis	Dementia in Alzheimer disease	rs55872725	T	C	0.0256	0.00459312	2.496e-08	-0.0213399	0.0230745	0.355056
All Osteoarthritis	Dementia in Alzheimer disease	rs62182810	A	G	0.027	0.00458257	3.818e-09	0.0332221	0.0230279	0.149109
All Osteoarthritis	Dementia in Alzheimer disease	rs62242105	A	G	-0.0289	0.00486894	2.928e-09	0.014731	0.0253124	0.560588
All Osteoarthritis	Dementia in Alzheimer disease	rs62262106	A	G	-0.0296	0.00528009	2.071e-08	-0.0396008	0.0289137	0.170805
All Osteoarthritis	Dementia in Alzheimer disease	rs75621460	A	G	0.0963	0.0157882	1.064e-09	0.161939	0.105054	0.123198
All Osteoarthritis	Dementia in Alzheimer disease	rs858936	T	C	-0.0378	0.00692658	4.836e-08	0.00824832	0.0366432	0.821903
All Osteoarthritis	Dementia in Alzheimer disease	rs9445214	T	G	-0.025	0.004556	4.082e-08	0.0441219	0.0231072	0.0562044
All Osteoarthritis	Dementia	rs10831476	A	C	0.0334	0.00578507	7.765e-09	0.0131831	0.0187594	0.482214
All Osteoarthritis	Dementia	rs10953758	A	G	0.0274	0.00453813	1.563e-09	-0.00106057	0.0136775	0.938193
All Osteoarthritis	Dementia	rs11726937	A	G	-0.0313	0.00529855	3.478e-09	-0.00185791	0.0174722	0.915316
All Osteoarthritis	Dementia	rs11731421	A	G	0.0306	0.00480283	1.875e-10	-0.000179362	0.0137785	0.989614
All Osteoarthritis	Dementia	rs11749736	T	C	-0.0293	0.00517577	1.505e-08	0.0148401	0.0163621	0.364418
All Osteoarthritis	Dementia	rs17677555	C	G	0.0299	0.00523283	1.104e-08	0.00500531	0.0174814	0.774631
All Osteoarthritis	Dementia	rs1913707	A	G	0.0328	0.0046296	1.392e-12	-0.0139521	0.0139108	0.315876
All Osteoarthritis	Dementia	rs216175	A	C	0.0423	0.00605098	2.737e-12	-0.0448903	0.0188761	0.0173996
All Osteoarthritis	Dementia	rs2425061	A	G	0.0329	0.0046832	2.139e-12	0.00374688	0.013699	0.784457
All Osteoarthritis	Dementia	rs2622873	T	C	0.0458	0.00694412	4.238e-11	0.00587472	0.0221574	0.790904
All Osteoarthritis	Dementia	rs2820444	A	G	0.028	0.00492803	1.333e-08	-0.0314212	0.0149017	0.0349824
All Osteoarthritis	Dementia	rs2856821	T	C	0.0321	0.00586052	4.318e-08	-0.00850804	0.0183868	0.64356
All Osteoarthritis	Dementia	rs3771501	A	G	0.0357	0.00454578	4.048e-15	0.0146876	0.0137535	0.285557
All Osteoarthritis	Dementia	rs4671010	A	C	0.0258	0.00452788	1.212e-08	-0.0149661	0.0136838	0.274082
All Osteoarthritis	Dementia	rs471464	A	C	0.031	0.00557162	2.638e-08	-0.0089332	0.0138561	0.519114
All Osteoarthritis	Dementia	rs4714791	T	G	-0.0252	0.00457357	3.59e-08	0.00684449	0.0136509	0.616093
All Osteoarthritis	Dementia	rs476330	T	C	0.0251	0.00458885	4.506e-08	-0.0231162	0.0139408	0.0972837
All Osteoarthritis	Dementia	rs55872725	T	C	0.0256	0.00459312	2.496e-08	-0.0117018	0.013783	0.395881
All Osteoarthritis	Dementia	rs62182810	A	G	0.027	0.00458257	3.818e-09	0.0192316	0.0137626	0.1623
All Osteoarthritis	Dementia	rs62242105	A	G	-0.0289	0.00486894	2.928e-09	0.0354956	0.0151326	0.0189946
All Osteoarthritis	Dementia	rs75621460	A	G	0.0963	0.0157882	1.064e-09	0.0275955	0.0629463	0.661098
All Osteoarthritis	Dementia	rs858936	T	C	-0.0378	0.00692658	4.836e-08	0.00246928	0.0219962	0.910618
All Osteoarthritis	Dementia	rs9445214	T	G	-0.025	0.004556	4.082e-08	0.00302436	0.0138403	0.827026
All Osteoarthritis	Unspecified dementia	rs10405617	A	G	0.0316	0.00487842	9.325e-11	-0.037811	0.0289805	0.191993
All Osteoarthritis	Unspecified dementia	rs10831476	A	C	0.0334	0.00578507	7.765e-09	-0.0708711	0.0358036	0.0477661
All Osteoarthritis	Unspecified dementia	rs10953758	A	G	0.0274	0.00453813	1.563e-09	-0.00370395	0.0261199	0.887234
All Osteoarthritis	Unspecified dementia	rs11726937	A	G	-0.0313	0.00529855	3.478e-09	0.0175452	0.0333419	0.598735
All Osteoarthritis	Unspecified dementia	rs11731421	A	G	0.0306	0.00480283	1.875e-10	-0.00150825	0.0264115	0.954461
All Osteoarthritis	Unspecified dementia	rs11749736	T	C	-0.0293	0.00517577	1.505e-08	0.0111687	0.0313501	0.721647
All Osteoarthritis	Unspecified dementia	rs1401795	A	G	0.0266	0.00457714	6.192e-09	-0.047007	0.0264121	0.0751173
All Osteoarthritis	Unspecified dementia	rs17677555	C	G	0.0299	0.00523283	1.104e-08	-0.0122122	0.0335239	0.715646
All Osteoarthritis	Unspecified dementia	rs1913707	A	G	0.0328	0.0046296	1.392e-12	0.0164202	0.0266853	0.538337
All Osteoarthritis	Unspecified dementia	rs216175	A	C	0.0423	0.00605098	2.737e-12	-0.0504599	0.0360155	0.161196
All Osteoarthritis	Unspecified dementia	rs2425061	A	G	0.0329	0.0046832	2.139e-12	0.0315385	0.0262327	0.229262
All Osteoarthritis	Unspecified dementia	rs2622873	T	C	0.0458	0.00694412	4.238e-11	-0.0325092	0.0428297	0.447832
All Osteoarthritis	Unspecified dementia	rs2820444	A	G	0.028	0.00492803	1.333e-08	-0.00398232	0.0286186	0.889331
All Osteoarthritis	Unspecified dementia	rs2856821	T	C	0.0321	0.00586052	4.318e-08	0.0199454	0.035374	0.572859
All Osteoarthritis	Unspecified dementia	rs3771501	A	G	0.0357	0.00454578	4.048e-15	-0.0144054	0.0263558	0.584673
All Osteoarthritis	Unspecified dementia	rs4671010	A	C	0.0258	0.00452788	1.212e-08	-0.00983127	0.0261794	0.707263
All Osteoarthritis	Unspecified dementia	rs471464	A	C	0.031	0.00557162	2.638e-08	0.00201483	0.0265517	0.939512
All Osteoarthritis	Unspecified dementia	rs4714791	T	G	-0.0252	0.00457357	3.59e-08	-0.03285	0.026167	0.209334
All Osteoarthritis	Unspecified dementia	rs476330	T	C	0.0251	0.00458885	4.506e-08	-0.0357181	0.0266921	0.180847
All Osteoarthritis	Unspecified dementia	rs55872725	T	C	0.0256	0.00459312	2.496e-08	-0.0345311	0.0264797	0.192214
All Osteoarthritis	Unspecified dementia	rs62182810	A	G	0.027	0.00458257	3.818e-09	-0.00692105	0.026383	0.793067
All Osteoarthritis	Unspecified dementia	rs62242105	A	G	-0.0289	0.00486894	2.928e-09	0.0305876	0.0289961	0.291477
All Osteoarthritis	Unspecified dementia	rs62262106	A	G	-0.0296	0.00528009	2.071e-08	-0.0741367	0.0329023	0.0242443
All Osteoarthritis	Unspecified dementia	rs75621460	A	G	0.0963	0.0157882	1.064e-09	0.0622907	0.121823	0.609127
All Osteoarthritis	Unspecified dementia	rs858936	T	C	-0.0378	0.00692658	4.836e-08	0.00693461	0.0419261	0.868628
All Osteoarthritis	Unspecified dementia	rs9445214	T	G	-0.025	0.004556	4.082e-08	-0.000986184	0.0265212	0.970338
All Osteoarthritis	Vascular dementia	rs10405617	A	G	0.0316	0.00487842	9.325e-11	-0.0406202	0.0359507	0.258524
All Osteoarthritis	Vascular dementia	rs10831476	A	C	0.0334	0.00578507	7.765e-09	-0.0550753	0.044518	0.216033
All Osteoarthritis	Vascular dementia	rs10953758	A	G	0.0274	0.00453813	1.563e-09	-0.0499901	0.0323007	0.121707
All Osteoarthritis	Vascular dementia	rs11726937	A	G	-0.0313	0.00529855	3.478e-09	-0.0256283	0.0413308	0.535207
All Osteoarthritis	Vascular dementia	rs11731421	A	G	0.0306	0.00480283	1.875e-10	0.00434437	0.0327064	0.894328
All Osteoarthritis	Vascular dementia	rs11749736	T	C	-0.0293	0.00517577	1.505e-08	0.0355226	0.0387065	0.358754
All Osteoarthritis	Vascular dementia	rs1401795	A	G	0.0266	0.00457714	6.192e-09	-0.0878016	0.032588	0.00705375
All Osteoarthritis	Vascular dementia	rs17677555	C	G	0.0299	0.00523283	1.104e-08	-0.0422172	0.041498	0.308996
All Osteoarthritis	Vascular dementia	rs1913707	A	G	0.0328	0.0046296	1.392e-12	0.00600077	0.0330429	0.855892
All Osteoarthritis	Vascular dementia	rs216175	A	C	0.0423	0.00605098	2.737e-12	0.0145477	0.0445801	0.744177
All Osteoarthritis	Vascular dementia	rs2425061	A	G	0.0329	0.0046832	2.139e-12	-0.0129996	0.0324336	0.688562
All Osteoarthritis	Vascular dementia	rs2622873	T	C	0.0458	0.00694412	4.238e-11	0.0307303	0.0529214	0.561458
All Osteoarthritis	Vascular dementia	rs2820444	A	G	0.028	0.00492803	1.333e-08	-0.0641693	0.0353538	0.0695152
All Osteoarthritis	Vascular dementia	rs2856821	T	C	0.0321	0.00586052	4.318e-08	-0.0560519	0.0438272	0.200922
All Osteoarthritis	Vascular dementia	rs3771501	A	G	0.0357	0.00454578	4.048e-15	-0.00716217	0.0325801	0.826001
All Osteoarthritis	Vascular dementia	rs4671010	A	C	0.0258	0.00452788	1.212e-08	-0.00182694	0.0323974	0.95503
All Osteoarthritis	Vascular dementia	rs471464	A	C	0.031	0.00557162	2.638e-08	-0.0404995	0.0328447	0.217552
All Osteoarthritis	Vascular dementia	rs4714791	T	G	-0.0252	0.00457357	3.59e-08	0.00595164	0.0323178	0.853888
All Osteoarthritis	Vascular dementia	rs476330	T	C	0.0251	0.00458885	4.506e-08	-0.00526977	0.0331054	0.873526
All Osteoarthritis	Vascular dementia	rs55872725	T	C	0.0256	0.00459312	2.496e-08	-0.026804	0.0326612	0.411836
All Osteoarthritis	Vascular dementia	rs62182810	A	G	0.027	0.00458257	3.818e-09	0.0626835	0.0326306	0.0547306
All Osteoarthritis	Vascular dementia	rs62242105	A	G	-0.0289	0.00486894	2.928e-09	0.0232264	0.0358103	0.516601
All Osteoarthritis	Vascular dementia	rs62262106	A	G	-0.0296	0.00528009	2.071e-08	-0.0574488	0.0409778	0.160931
All Osteoarthritis	Vascular dementia	rs75621460	A	G	0.0963	0.0157882	1.064e-09	-0.121076	0.148324	0.414331
All Osteoarthritis	Vascular dementia	rs858936	T	C	-0.0378	0.00692658	4.836e-08	0.0591397	0.0520568	0.255931
All Osteoarthritis	Vascular dementia	rs9445214	T	G	-0.025	0.004556	4.082e-08	-0.0471207	0.032761	0.150344
All Osteoarthritis	Frontotemporal dementia, wide, incl. Pick's disease	rs10405617	A	G	0.0316	0.00487842	9.325e-11	0.10536	0.145503	0.469
All Osteoarthritis	Frontotemporal dementia, wide, incl. Pick's disease	rs10831476	A	C	0.0334	0.00578507	7.765e-09	0.247945	0.180073	0.168538
All Osteoarthritis	Frontotemporal dementia, wide, incl. Pick's disease	rs10953758	A	G	0.0274	0.00453813	1.563e-09	0.00431902	0.130828	0.973664
All Osteoarthritis	Frontotemporal dementia, wide, incl. Pick's disease	rs11726937	A	G	-0.0313	0.00529855	3.478e-09	-0.177426	0.169443	0.295048
All Osteoarthritis	Frontotemporal dementia, wide, incl. Pick's disease	rs11731421	A	G	0.0306	0.00480283	1.875e-10	-0.0589043	0.13174	0.654784
All Osteoarthritis	Frontotemporal dementia, wide, incl. Pick's disease	rs11749736	T	C	-0.0293	0.00517577	1.505e-08	0.0330459	0.156926	0.833213
All Osteoarthritis	Frontotemporal dementia, wide, incl. Pick's disease	rs1401795	A	G	0.0266	0.00457714	6.192e-09	-0.0774895	0.132266	0.557969
All Osteoarthritis	Frontotemporal dementia, wide, incl. Pick's disease	rs17677555	C	G	0.0299	0.00523283	1.104e-08	-0.0674312	0.16914	0.690135
All Osteoarthritis	Frontotemporal dementia, wide, incl. Pick's disease	rs1913707	A	G	0.0328	0.0046296	1.392e-12	-0.0516965	0.133488	0.698554
All Osteoarthritis	Frontotemporal dementia, wide, incl. Pick's disease	rs216175	A	C	0.0423	0.00605098	2.737e-12	0.0375318	0.182239	0.836831
All Osteoarthritis	Frontotemporal dementia, wide, incl. Pick's disease	rs2425061	A	G	0.0329	0.0046832	2.139e-12	-0.0240539	0.130581	0.853851
All Osteoarthritis	Frontotemporal dementia, wide, incl. Pick's disease	rs2622873	T	C	0.0458	0.00694412	4.238e-11	-0.276049	0.209733	0.18811
All Osteoarthritis	Frontotemporal dementia, wide, incl. Pick's disease	rs2820444	A	G	0.028	0.00492803	1.333e-08	0.212507	0.142122	0.13485
All Osteoarthritis	Frontotemporal dementia, wide, incl. Pick's disease	rs2856821	T	C	0.0321	0.00586052	4.318e-08	0.0837959	0.175575	0.633172
All Osteoarthritis	Frontotemporal dementia, wide, incl. Pick's disease	rs3771501	A	G	0.0357	0.00454578	4.048e-15	0.144132	0.132077	0.275154
All Osteoarthritis	Frontotemporal dementia, wide, incl. Pick's disease	rs4671010	A	C	0.0258	0.00452788	1.212e-08	-0.127211	0.130945	0.331307
All Osteoarthritis	Frontotemporal dementia, wide, incl. Pick's disease	rs471464	A	C	0.031	0.00557162	2.638e-08	0.0694184	0.133313	0.602562
All Osteoarthritis	Frontotemporal dementia, wide, incl. Pick's disease	rs4714791	T	G	-0.0252	0.00457357	3.59e-08	-0.0775199	0.131025	0.554091
All Osteoarthritis	Frontotemporal dementia, wide, incl. Pick's disease	rs476330	T	C	0.0251	0.00458885	4.506e-08	-0.211583	0.133714	0.113567
All Osteoarthritis	Frontotemporal dementia, wide, incl. Pick's disease	rs55872725	T	C	0.0256	0.00459312	2.496e-08	-0.105576	0.132187	0.424473
All Osteoarthritis	Frontotemporal dementia, wide, incl. Pick's disease	rs62182810	A	G	0.027	0.00458257	3.818e-09	-0.0432859	0.132375	0.743673
All Osteoarthritis	Frontotemporal dementia, wide, incl. Pick's disease	rs62242105	A	G	-0.0289	0.00486894	2.928e-09	0.273052	0.144713	0.0591807
All Osteoarthritis	Frontotemporal dementia, wide, incl. Pick's disease	rs62262106	A	G	-0.0296	0.00528009	2.071e-08	0.0477645	0.164468	0.771497
All Osteoarthritis	Frontotemporal dementia, wide, incl. Pick's disease	rs75621460	A	G	0.0963	0.0157882	1.064e-09	0.052964	0.611029	0.930926
All Osteoarthritis	Frontotemporal dementia, wide, incl. Pick's disease	rs858936	T	C	-0.0378	0.00692658	4.836e-08	0.121431	0.213406	0.569347
All Osteoarthritis	Frontotemporal dementia, wide, incl. Pick's disease	rs9445214	T	G	-0.025	0.004556	4.082e-08	-0.185631	0.132916	0.162531
KneeHip Osteoarthritis	Dementia with Lewy bodies	rs10831476	A	C	0.0446	0.00777152	9.529e-09	0.0288471	0.0473585	0.542437
KneeHip Osteoarthritis	Dementia with Lewy bodies	rs10843013	A	C	-0.0477	0.00743729	1.421e-10	0.0510291	0.0462619	0.270003
KneeHip Osteoarthritis	Dementia with Lewy bodies	rs12724172	T	G	-0.0444	0.00796729	2.507e-08	4.90012e-05	0.0372631	0.998945
KneeHip Osteoarthritis	Dementia with Lewy bodies	rs12922868	T	C	0.0492	0.00882674	2.49e-08	-0.0120076	0.0556583	0.829219
KneeHip Osteoarthritis	Dementia with Lewy bodies	rs1426371	A	G	-0.0408	0.0071815	1.337e-08	0.076887	0.0420212	0.0673023
KneeHip Osteoarthritis	Dementia with Lewy bodies	rs143384	A	G	0.0577	0.00619571	1.244e-20	-0.0361583	0.0377062	0.337595
KneeHip Osteoarthritis	Dementia with Lewy bodies	rs1467246	T	C	-0.0401	0.00607231	4.009e-11	-0.0144846	0.0370184	0.695546
KneeHip Osteoarthritis	Dementia with Lewy bodies	rs1517572	A	C	0.0382	0.00619027	6.787e-10	0.0191259	0.037716	0.612004
KneeHip Osteoarthritis	Dementia with Lewy bodies	rs1631174	A	C	0.0388	0.00670772	7.278e-09	0.0305389	0.0395074	0.439487
KneeHip Osteoarthritis	Dementia with Lewy bodies	rs17615906	T	C	-0.0543	0.00821066	3.757e-11	0.0130275	0.0507099	0.79726
KneeHip Osteoarthritis	Dementia with Lewy bodies	rs1907328	T	C	0.0348	0.00637668	4.832e-08	0.00352378	0.0396153	0.929189
KneeHip Osteoarthritis	Dementia with Lewy bodies	rs1913707	A	G	0.0419	0.00620582	1.461e-11	0.00605731	0.0386237	0.875377
KneeHip Osteoarthritis	Dementia with Lewy bodies	rs227744	A	G	-0.0486	0.0086978	2.302e-08	0.0176152	0.0418408	0.673747
KneeHip Osteoarthritis	Dementia with Lewy bodies	rs2521349	A	G	0.0352	0.00620772	1.425e-08	-0.0964977	0.0381735	0.011476
KneeHip Osteoarthritis	Dementia with Lewy bodies	rs2605110	T	C	-0.0505	0.00647295	6.108e-15	0.0398194	0.039799	0.31706
KneeHip Osteoarthritis	Dementia with Lewy bodies	rs2622873	T	C	0.0557	0.00932219	2.301e-09	0.0179736	0.0554586	0.74587
KneeHip Osteoarthritis	Dementia with Lewy bodies	rs2856821	T	C	0.0461	0.00791395	5.706e-09	0.0186916	0.0453916	0.680495
KneeHip Osteoarthritis	Dementia with Lewy bodies	rs3755381	T	C	0.0442	0.0060983	4.232e-13	0.0154106	0.0367986	0.675457
KneeHip Osteoarthritis	Dementia with Lewy bodies	rs3884606	A	G	-0.0374	0.00610414	8.956e-10	-0.0104156	0.0373164	0.780175
KneeHip Osteoarthritis	Dementia with Lewy bodies	rs4760621	A	G	0.0457	0.00822363	2.742e-08	-0.0583158	0.0499208	0.242743
KneeHip Osteoarthritis	Dementia with Lewy bodies	rs74676797	A	G	0.0498	0.00805744	6.385e-10	0.0126385	0.0484633	0.794251
KneeHip Osteoarthritis	Dementia with Lewy bodies	rs7581446	T	C	-0.0485	0.00737669	4.873e-11	0.0124521	0.0370784	0.736919
KneeHip Osteoarthritis	Dementia with Lewy bodies	rs7640898	A	G	-0.0392	0.00703181	2.48e-08	-0.00137905	0.0428567	0.974293
KneeHip Osteoarthritis	Dementia with Lewy bodies	rs7792176	T	C	0.0472	0.0085113	2.93e-08	-0.0383895	0.0508133	0.449951
KneeHip Osteoarthritis	Dementia with Lewy bodies	rs7953894	A	C	0.0341	0.00619642	3.73e-08	-0.0374973	0.0370162	0.311065
KneeHip Osteoarthritis	Dementia with Lewy bodies	rs9472367	T	C	0.0404	0.0069264	5.452e-09	0.023189	0.0423714	0.584258
KneeHip Osteoarthritis	Dementia with Lewy bodies	rs9940278	T	C	0.0537	0.00610701	1.454e-18	0.0245755	0.0374434	0.511548
KneeHip Osteoarthritis	Dementia with Lewy bodies	rs9981884	A	G	-0.0336	0.00607981	3.267e-08	0.0143762	0.0372744	0.699811
KneeHip Osteoarthritis	Dementia in Alzheimer disease	rs1046934	A	C	0.0352	0.00634768	2.934e-08	-0.0575315	0.0231201	0.0128328
KneeHip Osteoarthritis	Dementia in Alzheimer disease	rs10831476	A	C	0.0446	0.00777152	9.529e-09	0.0429325	0.031426	0.171894
KneeHip Osteoarthritis	Dementia in Alzheimer disease	rs10843013	A	C	-0.0477	0.00743729	1.421e-10	0.00871718	0.0286192	0.760677
KneeHip Osteoarthritis	Dementia in Alzheimer disease	rs12724172	T	G	-0.0444	0.00796729	2.507e-08	0.0207385	0.0234021	0.375519
KneeHip Osteoarthritis	Dementia in Alzheimer disease	rs12922868	T	C	0.0492	0.00882674	2.49e-08	-0.00121492	0.0356082	0.972782
KneeHip Osteoarthritis	Dementia in Alzheimer disease	rs1426371	A	G	-0.0408	0.0071815	1.337e-08	-0.0299602	0.0239753	0.211436
KneeHip Osteoarthritis	Dementia in Alzheimer disease	rs143384	A	G	0.0577	0.00619571	1.244e-20	0.00557256	0.0230055	0.808604
KneeHip Osteoarthritis	Dementia in Alzheimer disease	rs1467246	T	C	-0.0401	0.00607231	4.009e-11	0.0258544	0.0230161	0.261301
KneeHip Osteoarthritis	Dementia in Alzheimer disease	rs1517572	A	C	0.0382	0.00619027	6.787e-10	0.017555	0.0245253	0.47412
KneeHip Osteoarthritis	Dementia in Alzheimer disease	rs1631174	A	C	0.0388	0.00670772	7.278e-09	0.0477608	0.0239435	0.0460723
KneeHip Osteoarthritis	Dementia in Alzheimer disease	rs17615906	T	C	-0.0543	0.00821066	3.757e-11	-0.0173855	0.0348422	0.617794
KneeHip Osteoarthritis	Dementia in Alzheimer disease	rs1907328	T	C	0.0348	0.00637668	4.832e-08	-0.00064657	0.0241454	0.978637
KneeHip Osteoarthritis	Dementia in Alzheimer disease	rs1913707	A	G	0.0419	0.00620582	1.461e-11	-0.039662	0.0232305	0.0877607
KneeHip Osteoarthritis	Dementia in Alzheimer disease	rs2521349	A	G	0.0352	0.00620772	1.425e-08	-0.0342708	0.0232141	0.139866
KneeHip Osteoarthritis	Dementia in Alzheimer disease	rs2605110	T	C	-0.0505	0.00647295	6.108e-15	0.063903	0.024183	0.00823
KneeHip Osteoarthritis	Dementia in Alzheimer disease	rs2622873	T	C	0.0557	0.00932219	2.301e-09	0.0380338	0.0371804	0.30633
KneeHip Osteoarthritis	Dementia in Alzheimer disease	rs2856821	T	C	0.0461	0.00791395	5.706e-09	0.0157546	0.0307178	0.608034
KneeHip Osteoarthritis	Dementia in Alzheimer disease	rs3755381	T	C	0.0442	0.0060983	4.232e-13	-0.00942064	0.022993	0.682012
KneeHip Osteoarthritis	Dementia in Alzheimer disease	rs3884606	A	G	-0.0374	0.00610414	8.956e-10	0.00939123	0.0228666	0.681295
KneeHip Osteoarthritis	Dementia in Alzheimer disease	rs4380013	A	G	0.0478	0.00786884	1.243e-09	-0.00315095	0.0384672	0.934716
KneeHip Osteoarthritis	Dementia in Alzheimer disease	rs4760621	A	G	0.0457	0.00822363	2.742e-08	0.00789417	0.0269482	0.769568
KneeHip Osteoarthritis	Dementia in Alzheimer disease	rs74676797	A	G	0.0498	0.00805744	6.385e-10	-0.0146712	0.0306766	0.632469
KneeHip Osteoarthritis	Dementia in Alzheimer disease	rs7581446	T	C	-0.0485	0.00737669	4.873e-11	0.0319831	0.0227644	0.160032
KneeHip Osteoarthritis	Dementia in Alzheimer disease	rs7640898	A	G	-0.0392	0.00703181	2.48e-08	-0.0204907	0.0275737	0.457406
KneeHip Osteoarthritis	Dementia in Alzheimer disease	rs7792176	T	C	0.0472	0.0085113	2.93e-08	0.024454	0.0286214	0.392886
KneeHip Osteoarthritis	Dementia in Alzheimer disease	rs7953894	A	C	0.0341	0.00619642	3.73e-08	-0.0244125	0.0228892	0.286175
KneeHip Osteoarthritis	Dementia in Alzheimer disease	rs9472367	T	C	0.0404	0.0069264	5.452e-09	0.00204325	0.0259758	0.937303
KneeHip Osteoarthritis	Dementia in Alzheimer disease	rs9940278	T	C	0.0537	0.00610701	1.454e-18	-0.0123739	0.0230058	0.590673
KneeHip Osteoarthritis	Dementia in Alzheimer disease	rs9981884	A	G	-0.0336	0.00607981	3.267e-08	0.00459	0.0237431	0.846709
KneeHip Osteoarthritis	Dementia	rs1046934	A	C	0.0352	0.00634768	2.934e-08	-0.0299184	0.0138692	0.0309913
KneeHip Osteoarthritis	Dementia	rs10831476	A	C	0.0446	0.00777152	9.529e-09	0.0131831	0.0187594	0.482214
KneeHip Osteoarthritis	Dementia	rs10843013	A	C	-0.0477	0.00743729	1.421e-10	-0.00791317	0.0171391	0.644294
KneeHip Osteoarthritis	Dementia	rs12724172	T	G	-0.0444	0.00796729	2.507e-08	0.00106506	0.0139933	0.93933
KneeHip Osteoarthritis	Dementia	rs12922868	T	C	0.0492	0.00882674	2.49e-08	-0.00516743	0.0212567	0.807931
KneeHip Osteoarthritis	Dementia	rs1426371	A	G	-0.0408	0.0071815	1.337e-08	0.00475696	0.0143839	0.74086
KneeHip Osteoarthritis	Dementia	rs143384	A	G	0.0577	0.00619571	1.244e-20	0.00562933	0.0137729	0.682741
KneeHip Osteoarthritis	Dementia	rs1467246	T	C	-0.0401	0.00607231	4.009e-11	0.0437821	0.0137994	0.00150994
KneeHip Osteoarthritis	Dementia	rs1517572	A	C	0.0382	0.00619027	6.787e-10	-0.00715105	0.0146585	0.625661
KneeHip Osteoarthritis	Dementia	rs1631174	A	C	0.0388	0.00670772	7.278e-09	0.0292147	0.0143582	0.0418803
KneeHip Osteoarthritis	Dementia	rs17615906	T	C	-0.0543	0.00821066	3.757e-11	-0.0102393	0.0208121	0.622729
KneeHip Osteoarthritis	Dementia	rs1907328	T	C	0.0348	0.00637668	4.832e-08	-2.65036e-05	0.0144764	0.998539
KneeHip Osteoarthritis	Dementia	rs1913707	A	G	0.0419	0.00620582	1.461e-11	-0.0139521	0.0139108	0.315876
KneeHip Osteoarthritis	Dementia	rs2521349	A	G	0.0352	0.00620772	1.425e-08	0.00509951	0.0138876	0.71347
KneeHip Osteoarthritis	Dementia	rs2605110	T	C	-0.0505	0.00647295	6.108e-15	0.0446182	0.0144469	0.00201219
KneeHip Osteoarthritis	Dementia	rs2622873	T	C	0.0557	0.00932219	2.301e-09	0.00587472	0.0221574	0.790904
KneeHip Osteoarthritis	Dementia	rs2856821	T	C	0.0461	0.00791395	5.706e-09	-0.00850804	0.0183868	0.64356
KneeHip Osteoarthritis	Dementia	rs3755381	T	C	0.0442	0.0060983	4.232e-13	0.0141132	0.0137535	0.304818
KneeHip Osteoarthritis	Dementia	rs3884606	A	G	-0.0374	0.00610414	8.956e-10	0.0110061	0.013712	0.422169
KneeHip Osteoarthritis	Dementia	rs4380013	A	G	0.0478	0.00786884	1.243e-09	0.00360689	0.0227258	0.873894
KneeHip Osteoarthritis	Dementia	rs4760621	A	G	0.0457	0.00822363	2.742e-08	-0.016354	0.0161344	0.310769
KneeHip Osteoarthritis	Dementia	rs74676797	A	G	0.0498	0.00805744	6.385e-10	2.22116e-05	0.0183642	0.999035
KneeHip Osteoarthritis	Dementia	rs7581446	T	C	-0.0485	0.00737669	4.873e-11	0.0164039	0.013634	0.228916
KneeHip Osteoarthritis	Dementia	rs7640898	A	G	-0.0392	0.00703181	2.48e-08	0.00350392	0.0165144	0.831972
KneeHip Osteoarthritis	Dementia	rs7792176	T	C	0.0472	0.0085113	2.93e-08	0.0311906	0.0171907	0.0696178
KneeHip Osteoarthritis	Dementia	rs7953894	A	C	0.0341	0.00619642	3.73e-08	-0.00620954	0.013708	0.650558
KneeHip Osteoarthritis	Dementia	rs9472367	T	C	0.0404	0.0069264	5.452e-09	0.00665188	0.0155449	0.668713
KneeHip Osteoarthritis	Dementia	rs9940278	T	C	0.0537	0.00610701	1.454e-18	-0.0109819	0.0137406	0.424157
KneeHip Osteoarthritis	Dementia	rs9981884	A	G	-0.0336	0.00607981	3.267e-08	0.0203137	0.0142002	0.152567
KneeHip Osteoarthritis	Unspecified dementia	rs1046934	A	C	0.0352	0.00634768	2.934e-08	-0.00916735	0.0265642	0.730017
KneeHip Osteoarthritis	Unspecified dementia	rs10831476	A	C	0.0446	0.00777152	9.529e-09	-0.0708711	0.0358036	0.0477661
KneeHip Osteoarthritis	Unspecified dementia	rs10843013	A	C	-0.0477	0.00743729	1.421e-10	0.0347386	0.032844	0.290199
KneeHip Osteoarthritis	Unspecified dementia	rs12724172	T	G	-0.0444	0.00796729	2.507e-08	0.0700936	0.0268433	0.00902215
KneeHip Osteoarthritis	Unspecified dementia	rs12922868	T	C	0.0492	0.00882674	2.49e-08	0.0275046	0.0401478	0.493292
KneeHip Osteoarthritis	Unspecified dementia	rs1426371	A	G	-0.0408	0.0071815	1.337e-08	0.0337731	0.0275315	0.219933
KneeHip Osteoarthritis	Unspecified dementia	rs143384	A	G	0.0577	0.00619571	1.244e-20	0.0284697	0.0263834	0.280554
KneeHip Osteoarthritis	Unspecified dementia	rs1467246	T	C	-0.0401	0.00607231	4.009e-11	0.0475468	0.0263656	0.0713313
KneeHip Osteoarthritis	Unspecified dementia	rs1517572	A	C	0.0382	0.00619027	6.787e-10	0.00627276	0.0279366	0.822341
KneeHip Osteoarthritis	Unspecified dementia	rs1631174	A	C	0.0388	0.00670772	7.278e-09	0.0389416	0.0275	0.156759
KneeHip Osteoarthritis	Unspecified dementia	rs17615906	T	C	-0.0543	0.00821066	3.757e-11	-0.00848462	0.0400371	0.83217
KneeHip Osteoarthritis	Unspecified dementia	rs1907328	T	C	0.0348	0.00637668	4.832e-08	0.0197132	0.0276059	0.475169
KneeHip Osteoarthritis	Unspecified dementia	rs1913707	A	G	0.0419	0.00620582	1.461e-11	0.0164202	0.0266853	0.538337
KneeHip Osteoarthritis	Unspecified dementia	rs2521349	A	G	0.0352	0.00620772	1.425e-08	-0.0283847	0.0266661	0.287124
KneeHip Osteoarthritis	Unspecified dementia	rs2605110	T	C	-0.0505	0.00647295	6.108e-15	0.0136628	0.0276284	0.620938
KneeHip Osteoarthritis	Unspecified dementia	rs2622873	T	C	0.0557	0.00932219	2.301e-09	-0.0325092	0.0428297	0.447832
KneeHip Osteoarthritis	Unspecified dementia	rs2856821	T	C	0.0461	0.00791395	5.706e-09	0.0199454	0.035374	0.572859
KneeHip Osteoarthritis	Unspecified dementia	rs3755381	T	C	0.0442	0.0060983	4.232e-13	-0.0149023	0.0263555	0.571777
KneeHip Osteoarthritis	Unspecified dementia	rs3884606	A	G	-0.0374	0.00610414	8.956e-10	0.0164132	0.0263094	0.532725
KneeHip Osteoarthritis	Unspecified dementia	rs4380013	A	G	0.0478	0.00786884	1.243e-09	0.0176848	0.0432192	0.682402
KneeHip Osteoarthritis	Unspecified dementia	rs4760621	A	G	0.0457	0.00822363	2.742e-08	-0.0259863	0.0309027	0.400401
KneeHip Osteoarthritis	Unspecified dementia	rs74676797	A	G	0.0498	0.00805744	6.385e-10	0.050675	0.0352431	0.150471
KneeHip Osteoarthritis	Unspecified dementia	rs7581446	T	C	-0.0485	0.00737669	4.873e-11	0.0183576	0.0260602	0.481164
KneeHip Osteoarthritis	Unspecified dementia	rs7640898	A	G	-0.0392	0.00703181	2.48e-08	0.0457771	0.0316474	0.148045
KneeHip Osteoarthritis	Unspecified dementia	rs7792176	T	C	0.0472	0.0085113	2.93e-08	0.0253357	0.0328494	0.440547
KneeHip Osteoarthritis	Unspecified dementia	rs7953894	A	C	0.0341	0.00619642	3.73e-08	-0.0264647	0.0262651	0.313646
KneeHip Osteoarthritis	Unspecified dementia	rs9472367	T	C	0.0404	0.0069264	5.452e-09	-0.0185287	0.0297156	0.532935
KneeHip Osteoarthritis	Unspecified dementia	rs9940278	T	C	0.0537	0.00610701	1.454e-18	-0.0393457	0.0263737	0.135738
KneeHip Osteoarthritis	Unspecified dementia	rs9981884	A	G	-0.0336	0.00607981	3.267e-08	0.0424729	0.027213	0.118581
KneeHip Osteoarthritis	Vascular dementia	rs1046934	A	C	0.0352	0.00634768	2.934e-08	-0.00244088	0.0328353	0.940742
KneeHip Osteoarthritis	Vascular dementia	rs10831476	A	C	0.0446	0.00777152	9.529e-09	-0.0550753	0.044518	0.216033
KneeHip Osteoarthritis	Vascular dementia	rs10843013	A	C	-0.0477	0.00743729	1.421e-10	-0.0212196	0.040622	0.601415
KneeHip Osteoarthritis	Vascular dementia	rs12724172	T	G	-0.0444	0.00796729	2.507e-08	-0.000639996	0.033203	0.984622
KneeHip Osteoarthritis	Vascular dementia	rs12922868	T	C	0.0492	0.00882674	2.49e-08	-0.0161304	0.0502098	0.748013
KneeHip Osteoarthritis	Vascular dementia	rs1426371	A	G	-0.0408	0.0071815	1.337e-08	0.0398519	0.0339646	0.240662
KneeHip Osteoarthritis	Vascular dementia	rs143384	A	G	0.0577	0.00619571	1.244e-20	-0.0138929	0.0326706	0.670659
KneeHip Osteoarthritis	Vascular dementia	rs1467246	T	C	-0.0401	0.00607231	4.009e-11	0.0871922	0.0325037	0.00730668
KneeHip Osteoarthritis	Vascular dementia	rs1517572	A	C	0.0382	0.00619027	6.787e-10	-0.0528949	0.0346406	0.12677
KneeHip Osteoarthritis	Vascular dementia	rs1631174	A	C	0.0388	0.00670772	7.278e-09	0.0443936	0.0339327	0.190777
KneeHip Osteoarthritis	Vascular dementia	rs17615906	T	C	-0.0543	0.00821066	3.757e-11	0.0420258	0.0495275	0.39614
KneeHip Osteoarthritis	Vascular dementia	rs1907328	T	C	0.0348	0.00637668	4.832e-08	-0.000830695	0.0342215	0.980634
KneeHip Osteoarthritis	Vascular dementia	rs1913707	A	G	0.0419	0.00620582	1.461e-11	0.00600077	0.0330429	0.855892
KneeHip Osteoarthritis	Vascular dementia	rs2521349	A	G	0.0352	0.00620772	1.425e-08	-0.00748288	0.0329396	0.820292
KneeHip Osteoarthritis	Vascular dementia	rs2605110	T	C	-0.0505	0.00647295	6.108e-15	0.0682486	0.0341535	0.0456857
KneeHip Osteoarthritis	Vascular dementia	rs2622873	T	C	0.0557	0.00932219	2.301e-09	0.0307303	0.0529214	0.561458
KneeHip Osteoarthritis	Vascular dementia	rs2856821	T	C	0.0461	0.00791395	5.706e-09	-0.0560519	0.0438272	0.200922
KneeHip Osteoarthritis	Vascular dementia	rs3755381	T	C	0.0442	0.0060983	4.232e-13	-0.0073373	0.0325832	0.821834
KneeHip Osteoarthritis	Vascular dementia	rs3884606	A	G	-0.0374	0.00610414	8.956e-10	-0.00977818	0.0325048	0.763549
KneeHip Osteoarthritis	Vascular dementia	rs4380013	A	G	0.0478	0.00786884	1.243e-09	0.00584087	0.0537664	0.913493
KneeHip Osteoarthritis	Vascular dementia	rs4760621	A	G	0.0457	0.00822363	2.742e-08	-0.0289828	0.0381728	0.447702
KneeHip Osteoarthritis	Vascular dementia	rs74676797	A	G	0.0498	0.00805744	6.385e-10	-0.0165474	0.0433293	0.702537
KneeHip Osteoarthritis	Vascular dementia	rs7581446	T	C	-0.0485	0.00737669	4.873e-11	0.0116015	0.0322502	0.719045
KneeHip Osteoarthritis	Vascular dementia	rs7640898	A	G	-0.0392	0.00703181	2.48e-08	0.00252984	0.0393024	0.948677
KneeHip Osteoarthritis	Vascular dementia	rs7792176	T	C	0.0472	0.0085113	2.93e-08	0.0246239	0.0407614	0.545779
KneeHip Osteoarthritis	Vascular dementia	rs7953894	A	C	0.0341	0.00619642	3.73e-08	-0.0152777	0.0325996	0.639323
KneeHip Osteoarthritis	Vascular dementia	rs9472367	T	C	0.0404	0.0069264	5.452e-09	-0.0281601	0.0367736	0.443814
KneeHip Osteoarthritis	Vascular dementia	rs9940278	T	C	0.0537	0.00610701	1.454e-18	-0.028587	0.0325627	0.379994
KneeHip Osteoarthritis	Vascular dementia	rs9981884	A	G	-0.0336	0.00607981	3.267e-08	0.0090487	0.0335726	0.787524
KneeHip Osteoarthritis	Frontotemporal dementia, wide, incl. Pick's disease	rs1046934	A	C	0.0352	0.00634768	2.934e-08	0.128746	0.131693	0.32826
KneeHip Osteoarthritis	Frontotemporal dementia, wide, incl. Pick's disease	rs10831476	A	C	0.0446	0.00777152	9.529e-09	0.247945	0.180073	0.168538
KneeHip Osteoarthritis	Frontotemporal dementia, wide, incl. Pick's disease	rs10843013	A	C	-0.0477	0.00743729	1.421e-10	-0.0921926	0.16456	0.575317
KneeHip Osteoarthritis	Frontotemporal dementia, wide, incl. Pick's disease	rs12724172	T	G	-0.0444	0.00796729	2.507e-08	0.24289	0.132946	0.0677033
KneeHip Osteoarthritis	Frontotemporal dementia, wide, incl. Pick's disease	rs12922868	T	C	0.0492	0.00882674	2.49e-08	0.0955313	0.206078	0.642956
KneeHip Osteoarthritis	Frontotemporal dementia, wide, incl. Pick's disease	rs1426371	A	G	-0.0408	0.0071815	1.337e-08	-0.0529447	0.138066	0.70137
KneeHip Osteoarthritis	Frontotemporal dementia, wide, incl. Pick's disease	rs143384	A	G	0.0577	0.00619571	1.244e-20	-0.0804935	0.131471	0.54037
KneeHip Osteoarthritis	Frontotemporal dementia, wide, incl. Pick's disease	rs1467246	T	C	-0.0401	0.00607231	4.009e-11	0.0693411	0.132172	0.599841
KneeHip Osteoarthritis	Frontotemporal dementia, wide, incl. Pick's disease	rs1517572	A	C	0.0382	0.00619027	6.787e-10	-0.0655013	0.141694	0.643886
KneeHip Osteoarthritis	Frontotemporal dementia, wide, incl. Pick's disease	rs1631174	A	C	0.0388	0.00670772	7.278e-09	-0.00943074	0.137081	0.945151
KneeHip Osteoarthritis	Frontotemporal dementia, wide, incl. Pick's disease	rs17615906	T	C	-0.0543	0.00821066	3.757e-11	-0.0846096	0.197471	0.668312
KneeHip Osteoarthritis	Frontotemporal dementia, wide, incl. Pick's disease	rs1907328	T	C	0.0348	0.00637668	4.832e-08	-0.0135247	0.13855	0.922237
KneeHip Osteoarthritis	Frontotemporal dementia, wide, incl. Pick's disease	rs1913707	A	G	0.0419	0.00620582	1.461e-11	-0.0516965	0.133488	0.698554
KneeHip Osteoarthritis	Frontotemporal dementia, wide, incl. Pick's disease	rs2521349	A	G	0.0352	0.00620772	1.425e-08	0.0857229	0.132928	0.519003
KneeHip Osteoarthritis	Frontotemporal dementia, wide, incl. Pick's disease	rs2605110	T	C	-0.0505	0.00647295	6.108e-15	-0.197618	0.137694	0.151233
KneeHip Osteoarthritis	Frontotemporal dementia, wide, incl. Pick's disease	rs2622873	T	C	0.0557	0.00932219	2.301e-09	-0.276049	0.209733	0.18811
KneeHip Osteoarthritis	Frontotemporal dementia, wide, incl. Pick's disease	rs2856821	T	C	0.0461	0.00791395	5.706e-09	0.0837959	0.175575	0.633172
KneeHip Osteoarthritis	Frontotemporal dementia, wide, incl. Pick's disease	rs3755381	T	C	0.0442	0.0060983	4.232e-13	0.143249	0.132061	0.278044
KneeHip Osteoarthritis	Frontotemporal dementia, wide, incl. Pick's disease	rs3884606	A	G	-0.0374	0.00610414	8.956e-10	-0.031961	0.131022	0.80728
KneeHip Osteoarthritis	Frontotemporal dementia, wide, incl. Pick's disease	rs4380013	A	G	0.0478	0.00786884	1.243e-09	-0.114962	0.218326	0.598498
KneeHip Osteoarthritis	Frontotemporal dementia, wide, incl. Pick's disease	rs4760621	A	G	0.0457	0.00822363	2.742e-08	-0.0792226	0.155034	0.60935
KneeHip Osteoarthritis	Frontotemporal dementia, wide, incl. Pick's disease	rs74676797	A	G	0.0498	0.00805744	6.385e-10	0.0309928	0.177924	0.861715
KneeHip Osteoarthritis	Frontotemporal dementia, wide, incl. Pick's disease	rs7581446	T	C	-0.0485	0.00737669	4.873e-11	0.130836	0.130545	0.316231
KneeHip Osteoarthritis	Frontotemporal dementia, wide, incl. Pick's disease	rs7640898	A	G	-0.0392	0.00703181	2.48e-08	-0.0355924	0.158327	0.822133
KneeHip Osteoarthritis	Frontotemporal dementia, wide, incl. Pick's disease	rs7792176	T	C	0.0472	0.0085113	2.93e-08	0.28203	0.163518	0.0845688
KneeHip Osteoarthritis	Frontotemporal dementia, wide, incl. Pick's disease	rs7953894	A	C	0.0341	0.00619642	3.73e-08	0.0469428	0.131588	0.721285
KneeHip Osteoarthritis	Frontotemporal dementia, wide, incl. Pick's disease	rs9472367	T	C	0.0404	0.0069264	5.452e-09	0.236851	0.148651	0.111084
KneeHip Osteoarthritis	Frontotemporal dementia, wide, incl. Pick's disease	rs9940278	T	C	0.0537	0.00610701	1.454e-18	-0.124766	0.131633	0.343213
KneeHip Osteoarthritis	Frontotemporal dementia, wide, incl. Pick's disease	rs9981884	A	G	-0.0336	0.00607981	3.267e-08	-0.0184337	0.136898	0.892886
Knee Osteoarthritis	Dementia with Lewy bodies	rs10038860	A	G	0.046	0.00789327	5.618e-09	0.0185469	0.0414344	0.654344
Knee Osteoarthritis	Dementia with Lewy bodies	rs1047891	A	C	0.0471	0.00847487	2.735e-08	0.0455373	0.0400763	0.255812
Knee Osteoarthritis	Dementia with Lewy bodies	rs1394094	A	T	-0.0412	0.00745003	3.199e-08	-0.047577	0.0385169	0.216743
Knee Osteoarthritis	Dementia with Lewy bodies	rs1426371	A	G	-0.0515	0.00840296	8.855e-10	0.076887	0.0420212	0.0673023
Knee Osteoarthritis	Dementia with Lewy bodies	rs143384	A	G	0.0722	0.0071909	1.012e-23	-0.0361583	0.0377062	0.337595
Knee Osteoarthritis	Dementia with Lewy bodies	rs17615906	T	C	-0.0523	0.00958669	4.884e-08	0.0130275	0.0507099	0.79726
Knee Osteoarthritis	Dementia with Lewy bodies	rs1790133	T	G	-0.0687	0.0110167	4.49e-10	0.048533	0.0448267	0.278997
Knee Osteoarthritis	Dementia with Lewy bodies	rs2066928	A	G	-0.0412	0.00722824	1.199e-08	-0.0148394	0.0372253	0.690108
Knee Osteoarthritis	Dementia with Lewy bodies	rs2791549	A	C	0.0457	0.00770894	3.063e-09	-0.0544013	0.0408091	0.182511
Knee Osteoarthritis	Dementia with Lewy bodies	rs2855438	A	T	0.0589	0.0107135	3.847e-08	-0.0516717	0.0550003	0.347483
Knee Osteoarthritis	Dementia with Lewy bodies	rs34195470	A	G	-0.0523	0.00717542	3.128e-13	-0.0405554	0.0372988	0.276903
Knee Osteoarthritis	Dementia with Lewy bodies	rs3778540	A	T	0.04	0.00729098	4.106e-08	0.0420623	0.0381112	0.269738
Knee Osteoarthritis	Dementia with Lewy bodies	rs3859514	T	C	0.0435	0.00744448	5.119e-09	0.00285592	0.0385523	0.940915
Knee Osteoarthritis	Dementia with Lewy bodies	rs4548913	A	G	-0.051	0.00731631	3.153e-12	-0.00983151	0.0389896	0.800938
Knee Osteoarthritis	Dementia with Lewy bodies	rs4775006	A	C	0.0464	0.0075639	8.548e-10	-0.035936	0.0375068	0.338
Knee Osteoarthritis	Dementia with Lewy bodies	rs4974591	A	G	-0.0421	0.00761763	3.264e-08	-0.0387814	0.0399923	0.332179
Knee Osteoarthritis	Dementia with Lewy bodies	rs6500609	C	G	-0.0668	0.0114344	5.157e-09	0.0664149	0.0602569	0.270348
Knee Osteoarthritis	Dementia with Lewy bodies	rs72979233	A	G	-0.0496	0.00832374	2.54e-09	-0.0396341	0.0430347	0.3571
Knee Osteoarthritis	Dementia with Lewy bodies	rs7581446	T	C	-0.0565	0.00884874	1.713e-10	0.0124521	0.0370784	0.736919
Knee Osteoarthritis	Dementia with Lewy bodies	rs7680647	T	C	-0.0442	0.00776238	1.24e-08	-0.0659188	0.0389054	0.090207
Knee Osteoarthritis	Dementia with Lewy bodies	rs7967762	T	C	0.057	0.0095142	2.085e-09	-0.0450612	0.0502343	0.369711
Knee Osteoarthritis	Dementia with Lewy bodies	rs9940278	T	C	0.058	0.00710263	3.188e-16	0.0245755	0.0374434	0.511548
Knee Osteoarthritis	Dementia in Alzheimer disease	rs10038860	A	G	0.046	0.00789327	5.618e-09	-0.00302144	0.0266447	0.909716
Knee Osteoarthritis	Dementia in Alzheimer disease	rs1047891	A	C	0.0471	0.00847487	2.735e-08	-0.0237085	0.0245132	0.333458
Knee Osteoarthritis	Dementia in Alzheimer disease	rs11703195	T	G	-0.0512	0.00862869	2.962e-09	-0.000902542	0.0329668	0.978159
Knee Osteoarthritis	Dementia in Alzheimer disease	rs1394094	A	T	-0.0412	0.00745003	3.199e-08	-0.0126364	0.0273365	0.643899
Knee Osteoarthritis	Dementia in Alzheimer disease	rs1426371	A	G	-0.0515	0.00840296	8.855e-10	-0.0299602	0.0239753	0.211436
Knee Osteoarthritis	Dementia in Alzheimer disease	rs143384	A	G	0.0722	0.0071909	1.012e-23	0.00557256	0.0230055	0.808604
Knee Osteoarthritis	Dementia in Alzheimer disease	rs17615906	T	C	-0.0523	0.00958669	4.884e-08	-0.0173855	0.0348422	0.617794
Knee Osteoarthritis	Dementia in Alzheimer disease	rs1790133	T	G	-0.0687	0.0110167	4.49e-10	0.0213022	0.0295945	0.471647
Knee Osteoarthritis	Dementia in Alzheimer disease	rs2066928	A	G	-0.0412	0.00722824	1.199e-08	0.00719755	0.0227501	0.751718
Knee Osteoarthritis	Dementia in Alzheimer disease	rs2791549	A	C	0.0457	0.00770894	3.063e-09	-0.0614698	0.0246302	0.0125707
Knee Osteoarthritis	Dementia in Alzheimer disease	rs2855438	A	T	0.0589	0.0107135	3.847e-08	0.057114	0.0301966	0.0585706
Knee Osteoarthritis	Dementia in Alzheimer disease	rs34195470	A	G	-0.0523	0.00717542	3.128e-13	-0.0139782	0.0229301	0.542126
Knee Osteoarthritis	Dementia in Alzheimer disease	rs3778540	A	T	0.04	0.00729098	4.106e-08	-0.0052162	0.0240452	0.828261
Knee Osteoarthritis	Dementia in Alzheimer disease	rs3859514	T	C	0.0435	0.00744448	5.119e-09	-0.0479779	0.025095	0.0558946
Knee Osteoarthritis	Dementia in Alzheimer disease	rs4380013	A	G	0.0562	0.00916645	8.73e-10	-0.00315095	0.0384672	0.934716
Knee Osteoarthritis	Dementia in Alzheimer disease	rs4548913	A	G	-0.051	0.00731631	3.153e-12	-0.00435472	0.0232607	0.851493
Knee Osteoarthritis	Dementia in Alzheimer disease	rs4775006	A	C	0.0464	0.0075639	8.548e-10	0.0101834	0.0229795	0.657656
Knee Osteoarthritis	Dementia in Alzheimer disease	rs4974591	A	G	-0.0421	0.00761763	3.264e-08	0.0435761	0.0243197	0.0731644
Knee Osteoarthritis	Dementia in Alzheimer disease	rs60733780	A	G	-0.0433	0.00764133	1.457e-08	0.0270199	0.0252194	0.283994
Knee Osteoarthritis	Dementia in Alzheimer disease	rs6500609	C	G	-0.0668	0.0114344	5.157e-09	0.0224816	0.0365431	0.538419
Knee Osteoarthritis	Dementia in Alzheimer disease	rs66906321	T	C	-0.0565	0.0093798	1.706e-09	0.0146861	0.0306767	0.632124
Knee Osteoarthritis	Dementia in Alzheimer disease	rs72979233	A	G	-0.0496	0.00832374	2.54e-09	-0.0114324	0.0270722	0.672812
Knee Osteoarthritis	Dementia in Alzheimer disease	rs7581446	T	C	-0.0565	0.00884874	1.713e-10	0.0319831	0.0227644	0.160032
Knee Osteoarthritis	Dementia in Alzheimer disease	rs7680647	T	C	-0.0442	0.00776238	1.24e-08	-0.00952786	0.0230701	0.679609
Knee Osteoarthritis	Dementia in Alzheimer disease	rs7967762	T	C	0.057	0.0095142	2.085e-09	0.00945697	0.0269502	0.72566
Knee Osteoarthritis	Dementia in Alzheimer disease	rs9940278	T	C	0.058	0.00710263	3.188e-16	-0.0123739	0.0230058	0.590673
Knee Osteoarthritis	Dementia	rs10038860	A	G	0.046	0.00789327	5.618e-09	-0.0152587	0.0159499	0.338737
Knee Osteoarthritis	Dementia	rs1047891	A	C	0.0471	0.00847487	2.735e-08	-0.0210013	0.0146641	0.1521
Knee Osteoarthritis	Dementia	rs11703195	T	G	-0.0512	0.00862869	2.962e-09	0.00293385	0.0197176	0.881717
Knee Osteoarthritis	Dementia	rs1394094	A	T	-0.0412	0.00745003	3.199e-08	-0.0271639	0.0163627	0.0968925
Knee Osteoarthritis	Dementia	rs1426371	A	G	-0.0515	0.00840296	8.855e-10	0.00475696	0.0143839	0.74086
Knee Osteoarthritis	Dementia	rs143384	A	G	0.0722	0.0071909	1.012e-23	0.00562933	0.0137729	0.682741
Knee Osteoarthritis	Dementia	rs17615906	T	C	-0.0523	0.00958669	4.884e-08	-0.0102393	0.0208121	0.622729
Knee Osteoarthritis	Dementia	rs1790133	T	G	-0.0687	0.0110167	4.49e-10	0.00305565	0.0176862	0.862832
Knee Osteoarthritis	Dementia	rs2066928	A	G	-0.0412	0.00722824	1.199e-08	0.0254521	0.0136322	0.0618942
Knee Osteoarthritis	Dementia	rs2855438	A	T	0.0589	0.0107135	3.847e-08	0.0145882	0.0180803	0.41975
Knee Osteoarthritis	Dementia	rs34195470	A	G	-0.0523	0.00717542	3.128e-13	-0.00889492	0.0136988	0.516131
Knee Osteoarthritis	Dementia	rs3778540	A	T	0.04	0.00729098	4.106e-08	-0.0129164	0.0143909	0.369432
Knee Osteoarthritis	Dementia	rs4380013	A	G	0.0562	0.00916645	8.73e-10	0.00360689	0.0227258	0.873894
Knee Osteoarthritis	Dementia	rs4548913	A	G	-0.051	0.00731631	3.153e-12	-0.000206397	0.0139314	0.98818
Knee Osteoarthritis	Dementia	rs4775006	A	C	0.0464	0.0075639	8.548e-10	0.0123851	0.0137629	0.368178
Knee Osteoarthritis	Dementia	rs60733780	A	G	-0.0433	0.00764133	1.457e-08	0.0312546	0.0151079	0.0385683
Knee Osteoarthritis	Dementia	rs6500609	C	G	-0.0668	0.0114344	5.157e-09	0.00257997	0.0218836	0.906151
Knee Osteoarthritis	Dementia	rs66906321	T	C	-0.0565	0.0093798	1.706e-09	-2.1201e-05	0.0183643	0.999079
Knee Osteoarthritis	Dementia	rs72979233	A	G	-0.0496	0.00832374	2.54e-09	-0.013348	0.016222	0.410603
Knee Osteoarthritis	Dementia	rs7581446	T	C	-0.0565	0.00884874	1.713e-10	0.0164039	0.013634	0.228916
Knee Osteoarthritis	Dementia	rs7680647	T	C	-0.0442	0.00776238	1.24e-08	-0.0109304	0.0138202	0.429002
Knee Osteoarthritis	Dementia	rs7967762	T	C	0.057	0.0095142	2.085e-09	-0.0139922	0.0161303	0.385697
Knee Osteoarthritis	Dementia	rs9940278	T	C	0.058	0.00710263	3.188e-16	-0.0109819	0.0137406	0.424157
Knee Osteoarthritis	Unspecified dementia	rs10038860	A	G	0.046	0.00789327	5.618e-09	0.00895708	0.0304655	0.768752
Knee Osteoarthritis	Unspecified dementia	rs1047891	A	C	0.0471	0.00847487	2.735e-08	0.00588156	0.0282342	0.834984
Knee Osteoarthritis	Unspecified dementia	rs11703195	T	G	-0.0512	0.00862869	2.962e-09	0.0268171	0.0374421	0.473851
Knee Osteoarthritis	Unspecified dementia	rs1394094	A	T	-0.0412	0.00745003	3.199e-08	0.00521445	0.0311181	0.866922
Knee Osteoarthritis	Unspecified dementia	rs1426371	A	G	-0.0515	0.00840296	8.855e-10	0.0337731	0.0275315	0.219933
Knee Osteoarthritis	Unspecified dementia	rs143384	A	G	0.0722	0.0071909	1.012e-23	0.0284697	0.0263834	0.280554
Knee Osteoarthritis	Unspecified dementia	rs17615906	T	C	-0.0523	0.00958669	4.884e-08	-0.00848462	0.0400371	0.83217
Knee Osteoarthritis	Unspecified dementia	rs1790133	T	G	-0.0687	0.0110167	4.49e-10	0.0727038	0.0338915	0.0319374
Knee Osteoarthritis	Unspecified dementia	rs2066928	A	G	-0.0412	0.00722824	1.199e-08	-0.0240992	0.0260918	0.355678
Knee Osteoarthritis	Unspecified dementia	rs2791549	A	C	0.0457	0.00770894	3.063e-09	-0.00750455	0.0282581	0.790569
Knee Osteoarthritis	Unspecified dementia	rs2855438	A	T	0.0589	0.0107135	3.847e-08	0.0746099	0.0348395	0.0322315
Knee Osteoarthritis	Unspecified dementia	rs34195470	A	G	-0.0523	0.00717542	3.128e-13	-0.037281	0.0262299	0.155224
Knee Osteoarthritis	Unspecified dementia	rs3778540	A	T	0.04	0.00729098	4.106e-08	0.00205006	0.0275079	0.940591
Knee Osteoarthritis	Unspecified dementia	rs3859514	T	C	0.0435	0.00744448	5.119e-09	-0.0330289	0.0287056	0.249894
Knee Osteoarthritis	Unspecified dementia	rs4380013	A	G	0.0562	0.00916645	8.73e-10	0.0176848	0.0432192	0.682402
Knee Osteoarthritis	Unspecified dementia	rs4548913	A	G	-0.051	0.00731631	3.153e-12	0.00054536	0.0266448	0.98367
Knee Osteoarthritis	Unspecified dementia	rs4775006	A	C	0.0464	0.0075639	8.548e-10	0.040435	0.0264599	0.126472
Knee Osteoarthritis	Unspecified dementia	rs4974591	A	G	-0.0421	0.00761763	3.264e-08	0.0300085	0.0278662	0.281535
Knee Osteoarthritis	Unspecified dementia	rs60733780	A	G	-0.0433	0.00764133	1.457e-08	0.048534	0.0287856	0.0917868
Knee Osteoarthritis	Unspecified dementia	rs6500609	C	G	-0.0668	0.0114344	5.157e-09	0.0215255	0.0420468	0.608693
Knee Osteoarthritis	Unspecified dementia	rs66906321	T	C	-0.0565	0.0093798	1.706e-09	-0.0506707	0.0352438	0.150513
Knee Osteoarthritis	Unspecified dementia	rs72979233	A	G	-0.0496	0.00832374	2.54e-09	0.00527559	0.030955	0.864674
Knee Osteoarthritis	Unspecified dementia	rs7581446	T	C	-0.0565	0.00884874	1.713e-10	0.0183576	0.0260602	0.481164
Knee Osteoarthritis	Unspecified dementia	rs7680647	T	C	-0.0442	0.00776238	1.24e-08	-0.00979642	0.0264975	0.711597
Knee Osteoarthritis	Unspecified dementia	rs7967762	T	C	0.057	0.0095142	2.085e-09	-0.0237123	0.0309044	0.442916
Knee Osteoarthritis	Unspecified dementia	rs9940278	T	C	0.058	0.00710263	3.188e-16	-0.0393457	0.0263737	0.135738
Knee Osteoarthritis	Vascular dementia	rs10038860	A	G	0.046	0.00789327	5.618e-09	-0.0365132	0.0377299	0.333169
Knee Osteoarthritis	Vascular dementia	rs1047891	A	C	0.0471	0.00847487	2.735e-08	-0.0725945	0.0348819	0.0374197
Knee Osteoarthritis	Vascular dementia	rs11703195	T	G	-0.0512	0.00862869	2.962e-09	0.016343	0.0463954	0.724646
Knee Osteoarthritis	Vascular dementia	rs1394094	A	T	-0.0412	0.00745003	3.199e-08	-0.0282015	0.0386548	0.465651
Knee Osteoarthritis	Vascular dementia	rs1426371	A	G	-0.0515	0.00840296	8.855e-10	0.0398519	0.0339646	0.240662
Knee Osteoarthritis	Vascular dementia	rs143384	A	G	0.0722	0.0071909	1.012e-23	-0.0138929	0.0326706	0.670659
Knee Osteoarthritis	Vascular dementia	rs17615906	T	C	-0.0523	0.00958669	4.884e-08	0.0420258	0.0495275	0.39614
Knee Osteoarthritis	Vascular dementia	rs1790133	T	G	-0.0687	0.0110167	4.49e-10	0.0206857	0.0418994	0.62152
Knee Osteoarthritis	Vascular dementia	rs2066928	A	G	-0.0412	0.00722824	1.199e-08	0.01118	0.0322474	0.728821
Knee Osteoarthritis	Vascular dementia	rs2791549	A	C	0.0457	0.00770894	3.063e-09	-0.0738936	0.0349395	0.0344382
Knee Osteoarthritis	Vascular dementia	rs2855438	A	T	0.0589	0.0107135	3.847e-08	-0.0418898	0.0430196	0.330186
Knee Osteoarthritis	Vascular dementia	rs34195470	A	G	-0.0523	0.00717542	3.128e-13	-0.0756489	0.0324709	0.0198198
Knee Osteoarthritis	Vascular dementia	rs3778540	A	T	0.04	0.00729098	4.106e-08	0.00468467	0.034003	0.89042
Knee Osteoarthritis	Vascular dementia	rs3859514	T	C	0.0435	0.00744448	5.119e-09	-0.0392391	0.0356497	0.271035
Knee Osteoarthritis	Vascular dementia	rs4380013	A	G	0.0562	0.00916645	8.73e-10	0.00584087	0.0537664	0.913493
Knee Osteoarthritis	Vascular dementia	rs4548913	A	G	-0.051	0.00731631	3.153e-12	-0.0262957	0.0329401	0.424703
Knee Osteoarthritis	Vascular dementia	rs4775006	A	C	0.0464	0.0075639	8.548e-10	0.0178808	0.0326739	0.584206
Knee Osteoarthritis	Vascular dementia	rs4974591	A	G	-0.0421	0.00761763	3.264e-08	0.0080328	0.0344456	0.815604
Knee Osteoarthritis	Vascular dementia	rs60733780	A	G	-0.0433	0.00764133	1.457e-08	0.0825443	0.0356063	0.0204357
Knee Osteoarthritis	Vascular dementia	rs6500609	C	G	-0.0668	0.0114344	5.157e-09	-0.059806	0.0517147	0.247493
Knee Osteoarthritis	Vascular dementia	rs66906321	T	C	-0.0565	0.0093798	1.706e-09	0.0165304	0.0433295	0.70283
Knee Osteoarthritis	Vascular dementia	rs72979233	A	G	-0.0496	0.00832374	2.54e-09	-0.0313763	0.0384637	0.41465
Knee Osteoarthritis	Vascular dementia	rs7581446	T	C	-0.0565	0.00884874	1.713e-10	0.0116015	0.0322502	0.719045
Knee Osteoarthritis	Vascular dementia	rs7680647	T	C	-0.0442	0.00776238	1.24e-08	-0.030891	0.0327955	0.346229
Knee Osteoarthritis	Vascular dementia	rs7967762	T	C	0.057	0.0095142	2.085e-09	-0.027061	0.038187	0.478545
Knee Osteoarthritis	Vascular dementia	rs9940278	T	C	0.058	0.00710263	3.188e-16	-0.028587	0.0325627	0.379994
Knee Osteoarthritis	Frontotemporal dementia, wide, incl. Pick's disease	rs10038860	A	G	0.046	0.00789327	5.618e-09	0.00993265	0.153248	0.948322
Knee Osteoarthritis	Frontotemporal dementia, wide, incl. Pick's disease	rs1047891	A	C	0.0471	0.00847487	2.735e-08	-0.225354	0.140019	0.107518
Knee Osteoarthritis	Frontotemporal dementia, wide, incl. Pick's disease	rs11703195	T	G	-0.0512	0.00862869	2.962e-09	-0.252862	0.192253	0.188422
Knee Osteoarthritis	Frontotemporal dementia, wide, incl. Pick's disease	rs1394094	A	T	-0.0412	0.00745003	3.199e-08	0.19302	0.157889	0.221515
Knee Osteoarthritis	Frontotemporal dementia, wide, incl. Pick's disease	rs1426371	A	G	-0.0515	0.00840296	8.855e-10	-0.0529447	0.138066	0.70137
Knee Osteoarthritis	Frontotemporal dementia, wide, incl. Pick's disease	rs143384	A	G	0.0722	0.0071909	1.012e-23	-0.0804935	0.131471	0.54037
Knee Osteoarthritis	Frontotemporal dementia, wide, incl. Pick's disease	rs17615906	T	C	-0.0523	0.00958669	4.884e-08	-0.0846096	0.197471	0.668312
Knee Osteoarthritis	Frontotemporal dementia, wide, incl. Pick's disease	rs1790133	T	G	-0.0687	0.0110167	4.49e-10	-0.287676	0.168486	0.0877445
Knee Osteoarthritis	Frontotemporal dementia, wide, incl. Pick's disease	rs2066928	A	G	-0.0412	0.00722824	1.199e-08	0.271623	0.130653	0.0376201
Knee Osteoarthritis	Frontotemporal dementia, wide, incl. Pick's disease	rs2791549	A	C	0.0457	0.00770894	3.063e-09	0.24882	0.140453	0.076468
Knee Osteoarthritis	Frontotemporal dementia, wide, incl. Pick's disease	rs2855438	A	T	0.0589	0.0107135	3.847e-08	0.156358	0.171461	0.361814
Knee Osteoarthritis	Frontotemporal dementia, wide, incl. Pick's disease	rs34195470	A	G	-0.0523	0.00717542	3.128e-13	-0.308778	0.131177	0.0185776
Knee Osteoarthritis	Frontotemporal dementia, wide, incl. Pick's disease	rs3778540	A	T	0.04	0.00729098	4.106e-08	-0.0974226	0.13801	0.480243
Knee Osteoarthritis	Frontotemporal dementia, wide, incl. Pick's disease	rs3859514	T	C	0.0435	0.00744448	5.119e-09	0.0631358	0.144154	0.661406
Knee Osteoarthritis	Frontotemporal dementia, wide, incl. Pick's disease	rs4380013	A	G	0.0562	0.00916645	8.73e-10	-0.114962	0.218326	0.598498
Knee Osteoarthritis	Frontotemporal dementia, wide, incl. Pick's disease	rs4548913	A	G	-0.051	0.00731631	3.153e-12	0.0931207	0.133853	0.486621
Knee Osteoarthritis	Frontotemporal dementia, wide, incl. Pick's disease	rs4775006	A	C	0.0464	0.0075639	8.548e-10	-0.246761	0.131735	0.0610464
Knee Osteoarthritis	Frontotemporal dementia, wide, incl. Pick's disease	rs4974591	A	G	-0.0421	0.00761763	3.264e-08	0.184427	0.139274	0.185434
Knee Osteoarthritis	Frontotemporal dementia, wide, incl. Pick's disease	rs60733780	A	G	-0.0433	0.00764133	1.457e-08	0.169484	0.145487	0.244042
Knee Osteoarthritis	Frontotemporal dementia, wide, incl. Pick's disease	rs6500609	C	G	-0.0668	0.0114344	5.157e-09	0.308836	0.208594	0.138724
Knee Osteoarthritis	Frontotemporal dementia, wide, incl. Pick's disease	rs66906321	T	C	-0.0565	0.0093798	1.706e-09	-0.0309931	0.177926	0.861715
Knee Osteoarthritis	Frontotemporal dementia, wide, incl. Pick's disease	rs72979233	A	G	-0.0496	0.00832374	2.54e-09	-0.0995036	0.155589	0.522478
Knee Osteoarthritis	Frontotemporal dementia, wide, incl. Pick's disease	rs7581446	T	C	-0.0565	0.00884874	1.713e-10	0.130836	0.130545	0.316231
Knee Osteoarthritis	Frontotemporal dementia, wide, incl. Pick's disease	rs7680647	T	C	-0.0442	0.00776238	1.24e-08	0.0595376	0.132176	0.652391
Knee Osteoarthritis	Frontotemporal dementia, wide, incl. Pick's disease	rs7967762	T	C	0.057	0.0095142	2.085e-09	-0.0801088	0.154987	0.605243
Knee Osteoarthritis	Frontotemporal dementia, wide, incl. Pick's disease	rs9940278	T	C	0.058	0.00710263	3.188e-16	-0.124766	0.131633	0.343213
Hip Osteoarthritis	Dementia with Lewy bodies	rs10492367	T	G	0.1147	0.0112801	2.746e-24	-0.0529136	0.0477936	0.26824
Hip Osteoarthritis	Dementia with Lewy bodies	rs10831477	T	G	0.0704	0.0115792	1.203e-09	0.0294597	0.0473407	0.533746
Hip Osteoarthritis	Dementia with Lewy bodies	rs10940168	A	G	-0.0534	0.00924821	7.737e-09	0.0503033	0.0382894	0.188888
Hip Osteoarthritis	Dementia with Lewy bodies	rs11164653	T	C	-0.0799	0.00916229	2.769e-18	0.0196359	0.037646	0.60201
Hip Osteoarthritis	Dementia with Lewy bodies	rs111844273	A	G	0.2317	0.0325242	1.049e-12	-0.208011	0.140107	0.137635
Hip Osteoarthritis	Dementia with Lewy bodies	rs11727676	T	C	-0.0849	0.0154835	4.176e-08	-0.0930531	0.0632632	0.141302
Hip Osteoarthritis	Dementia with Lewy bodies	rs17677724	T	C	0.0723	0.0122447	3.535e-09	-0.027841	0.0506973	0.582896
Hip Osteoarthritis	Dementia with Lewy bodies	rs1809889	T	C	0.0596	0.0100976	3.583e-09	0.0543177	0.0424788	0.200989
Hip Osteoarthritis	Dementia with Lewy bodies	rs1913707	A	G	0.0677	0.00919699	1.824e-13	0.00605731	0.0386237	0.875377
Hip Osteoarthritis	Dementia with Lewy bodies	rs2188730	A	G	0.0722	0.0126025	1.01e-08	0.019734	0.0507521	0.697431
Hip Osteoarthritis	Dementia with Lewy bodies	rs2521348	T	C	0.0555	0.00919173	1.56e-09	-0.0942964	0.0381716	0.013499
Hip Osteoarthritis	Dementia with Lewy bodies	rs2605098	A	G	0.0651	0.00948804	6.825e-12	-0.0417547	0.0394985	0.290459
Hip Osteoarthritis	Dementia with Lewy bodies	rs2862851	T	C	0.0655	0.00902152	3.859e-13	0.0152531	0.0368146	0.678635
Hip Osteoarthritis	Dementia with Lewy bodies	rs3740129	A	G	0.0547	0.00909881	1.835e-09	0.00811697	0.0371171	0.826942
Hip Osteoarthritis	Dementia with Lewy bodies	rs4073717	T	G	-0.0672	0.0112767	2.535e-09	-0.0272109	0.0463825	0.557427
Hip Osteoarthritis	Dementia with Lewy bodies	rs4252548	T	C	0.2254	0.0284327	2.236e-15	0.152738	0.115402	0.185649
Hip Osteoarthritis	Dementia with Lewy bodies	rs4411121	T	C	0.0648	0.00967928	2.161e-11	0.0362066	0.0399552	0.36481
Hip Osteoarthritis	Dementia with Lewy bodies	rs66989638	A	G	0.0789	0.013477	4.787e-09	0.0470362	0.0564152	0.404405
Hip Osteoarthritis	Dementia with Lewy bodies	rs67924081	A	G	0.0642	0.010441	7.804e-10	7.10025e-05	0.0421611	0.998648
Hip Osteoarthritis	Dementia with Lewy bodies	rs6908606	A	G	-0.0688	0.00991049	3.862e-12	-0.000569838	0.040931	0.98882
Hip Osteoarthritis	Dementia with Lewy bodies	rs788857	A	G	-0.0544	0.00993906	4.416e-08	-0.0203711	0.0407568	0.617157
Hip Osteoarthritis	Dementia with Lewy bodies	rs798756	T	C	-0.0683	0.0114223	2.238e-09	-0.0062837	0.0455707	0.890333
Hip Osteoarthritis	Dementia with Lewy bodies	rs9835230	A	G	0.0638	0.0105235	1.339e-09	0.0215168	0.0433704	0.619773
Hip Osteoarthritis	Dementia in Alzheimer disease	rs1046934	A	C	0.0712	0.00940875	3.807e-14	-0.0575315	0.0231201	0.0128328
Hip Osteoarthritis	Dementia in Alzheimer disease	rs10492367	T	G	0.1147	0.0112801	2.746e-24	-0.0309978	0.0302371	0.305289
Hip Osteoarthritis	Dementia in Alzheimer disease	rs10831477	T	G	0.0704	0.0115792	1.203e-09	0.0431685	0.0314332	0.169647
Hip Osteoarthritis	Dementia in Alzheimer disease	rs10940168	A	G	-0.0534	0.00924821	7.737e-09	-0.00991169	0.0239968	0.679576
Hip Osteoarthritis	Dementia in Alzheimer disease	rs11164653	T	C	-0.0799	0.00916229	2.769e-18	-0.0399842	0.0229038	0.0808556
Hip Osteoarthritis	Dementia in Alzheimer disease	rs111844273	A	G	0.2317	0.0325242	1.049e-12	0.111719	0.167094	0.50375
Hip Osteoarthritis	Dementia in Alzheimer disease	rs11727676	T	C	-0.0849	0.0154835	4.176e-08	0.00134538	0.0404136	0.973443
Hip Osteoarthritis	Dementia in Alzheimer disease	rs1401796	A	C	-0.0583	0.00909169	1.432e-10	0.0241149	0.0230498	0.295465
Hip Osteoarthritis	Dementia in Alzheimer disease	rs17677724	T	C	0.0723	0.0122447	3.535e-09	0.016326	0.0351802	0.642599
Hip Osteoarthritis	Dementia in Alzheimer disease	rs1809889	T	C	0.0596	0.0100976	3.583e-09	-0.0376136	0.0249265	0.131304
Hip Osteoarthritis	Dementia in Alzheimer disease	rs1913707	A	G	0.0677	0.00919699	1.824e-13	-0.039662	0.0232305	0.0877607
Hip Osteoarthritis	Dementia in Alzheimer disease	rs2188730	A	G	0.0722	0.0126025	1.01e-08	-0.0571809	0.0343212	0.0957018
Hip Osteoarthritis	Dementia in Alzheimer disease	rs2521348	T	C	0.0555	0.00919173	1.56e-09	-0.0352107	0.0232172	0.129373
Hip Osteoarthritis	Dementia in Alzheimer disease	rs2605098	A	G	0.0651	0.00948804	6.825e-12	-0.0613077	0.0238241	0.0100719
Hip Osteoarthritis	Dementia in Alzheimer disease	rs28567725	T	C	-0.0546	0.00906637	1.72e-09	-0.00135521	0.0231163	0.95325
Hip Osteoarthritis	Dementia in Alzheimer disease	rs2862851	T	C	0.0655	0.00902152	3.859e-13	-0.00956844	0.022988	0.677238
Hip Osteoarthritis	Dementia in Alzheimer disease	rs3740129	A	G	0.0547	0.00909881	1.835e-09	-0.0127866	0.024086	0.595506
Hip Osteoarthritis	Dementia in Alzheimer disease	rs4073717	T	G	-0.0672	0.0112767	2.535e-09	0.030002	0.0292007	0.304212
Hip Osteoarthritis	Dementia in Alzheimer disease	rs4252548	T	C	0.2254	0.0284327	2.236e-15	-0.0625898	0.0719954	0.384651
Hip Osteoarthritis	Dementia in Alzheimer disease	rs4411121	T	C	0.0648	0.00967928	2.161e-11	-0.033279	0.0250576	0.184144
Hip Osteoarthritis	Dementia in Alzheimer disease	rs66989638	A	G	0.0789	0.013477	4.787e-09	-0.023593	0.0290906	0.417354
Hip Osteoarthritis	Dementia in Alzheimer disease	rs67924081	A	G	0.0642	0.010441	7.804e-10	0.00910757	0.0307833	0.767337
Hip Osteoarthritis	Dementia in Alzheimer disease	rs6908606	A	G	-0.0688	0.00991049	3.862e-12	-0.0101279	0.0248762	0.683912
Hip Osteoarthritis	Dementia in Alzheimer disease	rs788857	A	G	-0.0544	0.00993906	4.416e-08	-0.01842	0.0235429	0.433977
Hip Osteoarthritis	Dementia in Alzheimer disease	rs79056043	A	G	-0.1136	0.0189374	1.989e-09	0.114126	0.0492278	0.0204315
Hip Osteoarthritis	Dementia in Alzheimer disease	rs79220007	T	C	-0.1059	0.0177055	2.215e-09	0.090865	0.0600082	0.129973
Hip Osteoarthritis	Dementia in Alzheimer disease	rs798756	T	C	-0.0683	0.0114223	2.238e-09	-0.000101156	0.0276953	0.997086
Hip Osteoarthritis	Dementia in Alzheimer disease	rs9475400	T	C	0.1084	0.0151383	8.029e-13	0.0149119	0.0410958	0.716713
Hip Osteoarthritis	Dementia in Alzheimer disease	rs9835230	A	G	0.0638	0.0105235	1.339e-09	0.0183361	0.0277214	0.508329
Hip Osteoarthritis	Dementia in Alzheimer disease	rs9976458	T	G	0.0628	0.0112498	2.373e-08	-0.0226904	0.0266378	0.394318
Hip Osteoarthritis	Dementia	rs1046934	A	C	0.0712	0.00940875	3.807e-14	-0.0299184	0.0138692	0.0309913
Hip Osteoarthritis	Dementia	rs10492367	T	G	0.1147	0.0112801	2.746e-24	0.000371791	0.0180979	0.98361
Hip Osteoarthritis	Dementia	rs10831477	T	G	0.0704	0.0115792	1.203e-09	0.0130598	0.018764	0.486427
Hip Osteoarthritis	Dementia	rs10940168	A	G	-0.0534	0.00924821	7.737e-09	0.021509	0.0143196	0.133079
Hip Osteoarthritis	Dementia	rs11164653	T	C	-0.0799	0.00916229	2.769e-18	-0.0129684	0.0137117	0.344256
Hip Osteoarthritis	Dementia	rs111844273	A	G	0.2317	0.0325242	1.049e-12	0.0823757	0.0994791	0.407631
Hip Osteoarthritis	Dementia	rs11727676	T	C	-0.0849	0.0154835	4.176e-08	0.00738111	0.0243065	0.761381
Hip Osteoarthritis	Dementia	rs1401796	A	C	-0.0583	0.00909169	1.432e-10	0.0442626	0.0138204	0.00136144
Hip Osteoarthritis	Dementia	rs17677724	T	C	0.0723	0.0122447	3.535e-09	0.00173967	0.0210299	0.934071
Hip Osteoarthritis	Dementia	rs1809889	T	C	0.0596	0.0100976	3.583e-09	-0.00827779	0.0148977	0.578456
Hip Osteoarthritis	Dementia	rs1913707	A	G	0.0677	0.00919699	1.824e-13	-0.0139521	0.0139108	0.315876
Hip Osteoarthritis	Dementia	rs2188730	A	G	0.0722	0.0126025	1.01e-08	-0.0309992	0.0204988	0.130472
Hip Osteoarthritis	Dementia	rs2521348	T	C	0.0555	0.00919173	1.56e-09	0.00533945	0.0138882	0.700639
Hip Osteoarthritis	Dementia	rs2605098	A	G	0.0651	0.00948804	6.825e-12	-0.0434481	0.0142762	0.00233916
Hip Osteoarthritis	Dementia	rs28567725	T	C	-0.0546	0.00906637	1.72e-09	0.00658366	0.0138065	0.633467
Hip Osteoarthritis	Dementia	rs2862851	T	C	0.0655	0.00902152	3.859e-13	0.0140756	0.0137515	0.306038
Hip Osteoarthritis	Dementia	rs3740129	A	G	0.0547	0.00909881	1.835e-09	0.00628749	0.014417	0.662752
Hip Osteoarthritis	Dementia	rs4073717	T	G	-0.0672	0.0112767	2.535e-09	0.0303365	0.0174117	0.0814554
Hip Osteoarthritis	Dementia	rs4252548	T	C	0.2254	0.0284327	2.236e-15	-0.0139964	0.0426656	0.742875
Hip Osteoarthritis	Dementia	rs4411121	T	C	0.0648	0.00967928	2.161e-11	-0.0227801	0.0150038	0.128941
Hip Osteoarthritis	Dementia	rs66989638	A	G	0.0789	0.013477	4.787e-09	-0.017742	0.0175583	0.312275
Hip Osteoarthritis	Dementia	rs67924081	A	G	0.0642	0.010441	7.804e-10	0.0101714	0.018336	0.579086
Hip Osteoarthritis	Dementia	rs6908606	A	G	-0.0688	0.00991049	3.862e-12	-0.0034831	0.0149068	0.815251
Hip Osteoarthritis	Dementia	rs788857	A	G	-0.0544	0.00993906	4.416e-08	-0.00601737	0.0140856	0.669234
Hip Osteoarthritis	Dementia	rs79056043	A	G	-0.1136	0.0189374	1.989e-09	0.0528643	0.0293495	0.0716721
Hip Osteoarthritis	Dementia	rs79220007	T	C	-0.1059	0.0177055	2.215e-09	-0.0297918	0.0361633	0.410046
Hip Osteoarthritis	Dementia	rs798756	T	C	-0.0683	0.0114223	2.238e-09	-0.0190907	0.0165868	0.24975
Hip Osteoarthritis	Dementia	rs9475400	T	C	0.1084	0.0151383	8.029e-13	-0.0227025	0.0245721	0.355531
Hip Osteoarthritis	Dementia	rs9835230	A	G	0.0638	0.0105235	1.339e-09	-0.00319634	0.0166137	0.847436
Hip Osteoarthritis	Dementia	rs9976458	T	G	0.0628	0.0112498	2.373e-08	0.00423227	0.015889	0.789958
Hip Osteoarthritis	Unspecified dementia	rs1046934	A	C	0.0712	0.00940875	3.807e-14	-0.00916735	0.0265642	0.730017
Hip Osteoarthritis	Unspecified dementia	rs10492367	T	G	0.1147	0.0112801	2.746e-24	-0.0455644	0.0346736	0.188814
Hip Osteoarthritis	Unspecified dementia	rs10831477	T	G	0.0704	0.0115792	1.203e-09	-0.0709073	0.0358094	0.0476892
Hip Osteoarthritis	Unspecified dementia	rs10940168	A	G	-0.0534	0.00924821	7.737e-09	0.0169261	0.027487	0.538037
Hip Osteoarthritis	Unspecified dementia	rs11164653	T	C	-0.0799	0.00916229	2.769e-18	0.00708328	0.0262801	0.787523
Hip Osteoarthritis	Unspecified dementia	rs111844273	A	G	0.2317	0.0325242	1.049e-12	-0.135863	0.186229	0.465667
Hip Osteoarthritis	Unspecified dementia	rs11727676	T	C	-0.0849	0.0154835	4.176e-08	0.058536	0.0463064	0.206194
Hip Osteoarthritis	Unspecified dementia	rs1401796	A	C	-0.0583	0.00909169	1.432e-10	0.048992	0.0263817	0.0633038
Hip Osteoarthritis	Unspecified dementia	rs17677724	T	C	0.0723	0.0122447	3.535e-09	-0.0115854	0.0405052	0.774861
Hip Osteoarthritis	Unspecified dementia	rs1809889	T	C	0.0596	0.0100976	3.583e-09	0.012705	0.0285327	0.65612
Hip Osteoarthritis	Unspecified dementia	rs1913707	A	G	0.0677	0.00919699	1.824e-13	0.0164202	0.0266853	0.538337
Hip Osteoarthritis	Unspecified dementia	rs2188730	A	G	0.0722	0.0126025	1.01e-08	-0.0263221	0.0392632	0.502602
Hip Osteoarthritis	Unspecified dementia	rs2521348	T	C	0.0555	0.00919173	1.56e-09	-0.0263737	0.0266628	0.322586
Hip Osteoarthritis	Unspecified dementia	rs2605098	A	G	0.0651	0.00948804	6.825e-12	-0.0122519	0.0273341	0.653987
Hip Osteoarthritis	Unspecified dementia	rs28567725	T	C	-0.0546	0.00906637	1.72e-09	0.025979	0.0264803	0.32656
Hip Osteoarthritis	Unspecified dementia	rs2862851	T	C	0.0655	0.00902152	3.859e-13	-0.0161004	0.0263531	0.541231
Hip Osteoarthritis	Unspecified dementia	rs3740129	A	G	0.0547	0.00909881	1.835e-09	-0.0133473	0.0275943	0.628601
Hip Osteoarthritis	Unspecified dementia	rs4073717	T	G	-0.0672	0.0112767	2.535e-09	0.0380599	0.0334233	0.254817
Hip Osteoarthritis	Unspecified dementia	rs4252548	T	C	0.2254	0.0284327	2.236e-15	-0.196544	0.0812938	0.0156189
Hip Osteoarthritis	Unspecified dementia	rs4411121	T	C	0.0648	0.00967928	2.161e-11	-0.0305575	0.0286971	0.286954
Hip Osteoarthritis	Unspecified dementia	rs66989638	A	G	0.0789	0.013477	4.787e-09	0.00563349	0.0336291	0.866962
Hip Osteoarthritis	Unspecified dementia	rs67924081	A	G	0.0642	0.010441	7.804e-10	0.0264375	0.035021	0.450306
Hip Osteoarthritis	Unspecified dementia	rs6908606	A	G	-0.0688	0.00991049	3.862e-12	0.0167404	0.0285081	0.557059
Hip Osteoarthritis	Unspecified dementia	rs788857	A	G	-0.0544	0.00993906	4.416e-08	-0.00103105	0.0270396	0.969583
Hip Osteoarthritis	Unspecified dementia	rs79056043	A	G	-0.1136	0.0189374	1.989e-09	0.0167318	0.0552938	0.762197
Hip Osteoarthritis	Unspecified dementia	rs79220007	T	C	-0.1059	0.0177055	2.215e-09	-0.0331166	0.0682577	0.627555
Hip Osteoarthritis	Unspecified dementia	rs798756	T	C	-0.0683	0.0114223	2.238e-09	-0.0539105	0.0317171	0.0891805
Hip Osteoarthritis	Unspecified dementia	rs9475400	T	C	0.1084	0.0151383	8.029e-13	-0.0469359	0.0467224	0.315103
Hip Osteoarthritis	Unspecified dementia	rs9835230	A	G	0.0638	0.0105235	1.339e-09	-0.0463168	0.0318192	0.145496
Hip Osteoarthritis	Unspecified dementia	rs9976458	T	G	0.0628	0.0112498	2.373e-08	0.00713476	0.030373	0.814283
Hip Osteoarthritis	Vascular dementia	rs1046934	A	C	0.0712	0.00940875	3.807e-14	-0.00244088	0.0328353	0.940742
Hip Osteoarthritis	Vascular dementia	rs10492367	T	G	0.1147	0.0112801	2.746e-24	0.00951393	0.0428474	0.824281
Hip Osteoarthritis	Vascular dementia	rs10831477	T	G	0.0704	0.0115792	1.203e-09	-0.0551325	0.0445291	0.215671
Hip Osteoarthritis	Vascular dementia	rs10940168	A	G	-0.0534	0.00924821	7.737e-09	0.00517276	0.0340715	0.879328
Hip Osteoarthritis	Vascular dementia	rs11164653	T	C	-0.0799	0.00916229	2.769e-18	0.0389385	0.0324239	0.229783
Hip Osteoarthritis	Vascular dementia	rs111844273	A	G	0.2317	0.0325242	1.049e-12	-0.0388271	0.227992	0.864774
Hip Osteoarthritis	Vascular dementia	rs11727676	T	C	-0.0849	0.0154835	4.176e-08	0.134768	0.0572553	0.0185823
Hip Osteoarthritis	Vascular dementia	rs1401796	A	C	-0.0583	0.00909169	1.432e-10	0.0913377	0.0325721	0.00504464
Hip Osteoarthritis	Vascular dementia	rs17677724	T	C	0.0723	0.0122447	3.535e-09	-0.0415399	0.0500351	0.406417
Hip Osteoarthritis	Vascular dementia	rs1809889	T	C	0.0596	0.0100976	3.583e-09	0.0191721	0.0352597	0.58662
Hip Osteoarthritis	Vascular dementia	rs1913707	A	G	0.0677	0.00919699	1.824e-13	0.00600077	0.0330429	0.855892
Hip Osteoarthritis	Vascular dementia	rs2188730	A	G	0.0722	0.0126025	1.01e-08	-0.0371277	0.0484363	0.443364
Hip Osteoarthritis	Vascular dementia	rs2521348	T	C	0.0555	0.00919173	1.56e-09	-0.00789537	0.032942	0.810583
Hip Osteoarthritis	Vascular dementia	rs2605098	A	G	0.0651	0.00948804	6.825e-12	-0.064637	0.0338122	0.0559217
Hip Osteoarthritis	Vascular dementia	rs28567725	T	C	-0.0546	0.00906637	1.72e-09	0.0279276	0.032687	0.392885
Hip Osteoarthritis	Vascular dementia	rs2862851	T	C	0.0655	0.00902152	3.859e-13	-0.00613055	0.0325811	0.850749
Hip Osteoarthritis	Vascular dementia	rs3740129	A	G	0.0547	0.00909881	1.835e-09	0.0607409	0.0341312	0.0751363
Hip Osteoarthritis	Vascular dementia	rs4073717	T	G	-0.0672	0.0112767	2.535e-09	-0.0585193	0.0412703	0.156205
Hip Osteoarthritis	Vascular dementia	rs4252548	T	C	0.2254	0.0284327	2.236e-15	0.0834163	0.100637	0.407172
Hip Osteoarthritis	Vascular dementia	rs4411121	T	C	0.0648	0.00967928	2.161e-11	-0.0266839	0.0354753	0.451941
Hip Osteoarthritis	Vascular dementia	rs66989638	A	G	0.0789	0.013477	4.787e-09	-0.0407033	0.0414981	0.326667
Hip Osteoarthritis	Vascular dementia	rs67924081	A	G	0.0642	0.010441	7.804e-10	0.0259643	0.0435081	0.550661
Hip Osteoarthritis	Vascular dementia	rs6908606	A	G	-0.0688	0.00991049	3.862e-12	0.0276855	0.0353562	0.433601
Hip Osteoarthritis	Vascular dementia	rs788857	A	G	-0.0544	0.00993906	4.416e-08	-0.0168467	0.0334877	0.614915
Hip Osteoarthritis	Vascular dementia	rs79056043	A	G	-0.1136	0.0189374	1.989e-09	0.0711666	0.0688235	0.301115
Hip Osteoarthritis	Vascular dementia	rs79220007	T	C	-0.1059	0.0177055	2.215e-09	-0.0112887	0.0852464	0.894649
Hip Osteoarthritis	Vascular dementia	rs798756	T	C	-0.0683	0.0114223	2.238e-09	-0.0193483	0.0393823	0.623219
Hip Osteoarthritis	Vascular dementia	rs9475400	T	C	0.1084	0.0151383	8.029e-13	-0.0733859	0.0578669	0.204732
Hip Osteoarthritis	Vascular dementia	rs9835230	A	G	0.0638	0.0105235	1.339e-09	0.00525514	0.0394809	0.89411
Hip Osteoarthritis	Vascular dementia	rs9976458	T	G	0.0628	0.0112498	2.373e-08	-0.0223541	0.0376361	0.552544
Hip Osteoarthritis	Frontotemporal dementia, wide, incl. Pick's disease	rs1046934	A	C	0.0712	0.00940875	3.807e-14	0.128746	0.131693	0.32826
Hip Osteoarthritis	Frontotemporal dementia, wide, incl. Pick's disease	rs10492367	T	G	0.1147	0.0112801	2.746e-24	-0.00469576	0.174605	0.978545
Hip Osteoarthritis	Frontotemporal dementia, wide, incl. Pick's disease	rs10831477	T	G	0.0704	0.0115792	1.203e-09	0.248053	0.180128	0.168484
Hip Osteoarthritis	Frontotemporal dementia, wide, incl. Pick's disease	rs10940168	A	G	-0.0534	0.00924821	7.737e-09	0.056152	0.137522	0.683045
Hip Osteoarthritis	Frontotemporal dementia, wide, incl. Pick's disease	rs11164653	T	C	-0.0799	0.00916229	2.769e-18	0.128449	0.130869	0.326342
Hip Osteoarthritis	Frontotemporal dementia, wide, incl. Pick's disease	rs111844273	A	G	0.2317	0.0325242	1.049e-12	1.89249	0.974124	0.0520451
Hip Osteoarthritis	Frontotemporal dementia, wide, incl. Pick's disease	rs11727676	T	C	-0.0849	0.0154835	4.176e-08	-0.129068	0.23103	0.576389
Hip Osteoarthritis	Frontotemporal dementia, wide, incl. Pick's disease	rs1401796	A	C	-0.0583	0.00909169	1.432e-10	0.0482065	0.132149	0.71527
Hip Osteoarthritis	Frontotemporal dementia, wide, incl. Pick's disease	rs17677724	T	C	0.0723	0.0122447	3.535e-09	0.0529733	0.199321	0.790418
Hip Osteoarthritis	Frontotemporal dementia, wide, incl. Pick's disease	rs1809889	T	C	0.0596	0.0100976	3.583e-09	-0.0678391	0.143339	0.636016
Hip Osteoarthritis	Frontotemporal dementia, wide, incl. Pick's disease	rs1913707	A	G	0.0677	0.00919699	1.824e-13	-0.0516965	0.133488	0.698554
Hip Osteoarthritis	Frontotemporal dementia, wide, incl. Pick's disease	rs2188730	A	G	0.0722	0.0126025	1.01e-08	0.0236835	0.194709	0.903188
Hip Osteoarthritis	Frontotemporal dementia, wide, incl. Pick's disease	rs2521348	T	C	0.0555	0.00919173	1.56e-09	0.0839011	0.132921	0.527903
Hip Osteoarthritis	Frontotemporal dementia, wide, incl. Pick's disease	rs2605098	A	G	0.0651	0.00948804	6.825e-12	0.190957	0.136025	0.160367
Hip Osteoarthritis	Frontotemporal dementia, wide, incl. Pick's disease	rs28567725	T	C	-0.0546	0.00906637	1.72e-09	0.0941842	0.132333	0.476638
Hip Osteoarthritis	Frontotemporal dementia, wide, incl. Pick's disease	rs2862851	T	C	0.0655	0.00902152	3.859e-13	0.144031	0.132032	0.275326
Hip Osteoarthritis	Frontotemporal dementia, wide, incl. Pick's disease	rs3740129	A	G	0.0547	0.00909881	1.835e-09	-0.152012	0.13908	0.274403
Hip Osteoarthritis	Frontotemporal dementia, wide, incl. Pick's disease	rs4073717	T	G	-0.0672	0.0112767	2.535e-09	-0.0666151	0.167259	0.690427
Hip Osteoarthritis	Frontotemporal dementia, wide, incl. Pick's disease	rs4252548	T	C	0.2254	0.0284327	2.236e-15	0.439774	0.421502	0.296786
Hip Osteoarthritis	Frontotemporal dementia, wide, incl. Pick's disease	rs4411121	T	C	0.0648	0.00967928	2.161e-11	0.0262789	0.144065	0.85526
Hip Osteoarthritis	Frontotemporal dementia, wide, incl. Pick's disease	rs66989638	A	G	0.0789	0.013477	4.787e-09	0.0321858	0.165483	0.845787
Hip Osteoarthritis	Frontotemporal dementia, wide, incl. Pick's disease	rs67924081	A	G	0.0642	0.010441	7.804e-10	-0.281526	0.178124	0.113991
Hip Osteoarthritis	Frontotemporal dementia, wide, incl. Pick's disease	rs6908606	A	G	-0.0688	0.00991049	3.862e-12	-0.175002	0.142388	0.219053
Hip Osteoarthritis	Frontotemporal dementia, wide, incl. Pick's disease	rs788857	A	G	-0.0544	0.00993906	4.416e-08	-0.207188	0.134929	0.124654
Hip Osteoarthritis	Frontotemporal dementia, wide, incl. Pick's disease	rs79056043	A	G	-0.1136	0.0189374	1.989e-09	0.0884475	0.284542	0.75592
Hip Osteoarthritis	Frontotemporal dementia, wide, incl. Pick's disease	rs79220007	T	C	-0.1059	0.0177055	2.215e-09	-0.422565	0.348967	0.225933
Hip Osteoarthritis	Frontotemporal dementia, wide, incl. Pick's disease	rs798756	T	C	-0.0683	0.0114223	2.238e-09	-0.0336527	0.157848	0.831173
Hip Osteoarthritis	Frontotemporal dementia, wide, incl. Pick's disease	rs9475400	T	C	0.1084	0.0151383	8.029e-13	0.12978	0.232037	0.575952
Hip Osteoarthritis	Frontotemporal dementia, wide, incl. Pick's disease	rs9835230	A	G	0.0638	0.0105235	1.339e-09	0.0267051	0.15905	0.866659
Hip Osteoarthritis	Frontotemporal dementia, wide, incl. Pick's disease	rs9976458	T	G	0.0628	0.0112498	2.373e-08	0.113241	0.152804	0.45864
Spine Osteoarthritis	Dementia with Lewy bodies	rs10043720	A	G	0.0593	0.0127173	3.117e-06	0.0202731	0.0393435	0.606397
Spine Osteoarthritis	Dementia with Lewy bodies	rs10900550	T	C	0.0505	0.010703	2.378e-06	-0.0422678	0.0379698	0.265622
Spine Osteoarthritis	Dementia with Lewy bodies	rs1104785	A	G	-0.0497	0.0100462	7.531e-07	-0.0669767	0.0372951	0.0725154
Spine Osteoarthritis	Dementia with Lewy bodies	rs11058226	T	C	-0.0545	0.0115281	2.272e-06	-0.039629	0.042321	0.349067
Spine Osteoarthritis	Dementia with Lewy bodies	rs11121639	A	G	0.1179	0.024328	1.258e-06	-0.168899	0.0986172	0.0867781
Spine Osteoarthritis	Dementia with Lewy bodies	rs117175376	A	T	0.246	0.0524478	2.727e-06	0.0556617	0.15118	0.712728
Spine Osteoarthritis	Dementia with Lewy bodies	rs117428541	T	C	0.1844	0.0380461	1.255e-06	-0.0840884	0.146317	0.565493
Spine Osteoarthritis	Dementia with Lewy bodies	rs12310519	T	C	0.0766	0.0138917	3.506e-08	-0.111865	0.0536395	0.0370237
Spine Osteoarthritis	Dementia with Lewy bodies	rs201930306	T	G	0.1367	0.0280759	1.122e-06	0.0896337	0.0812674	0.270048
Spine Osteoarthritis	Dementia with Lewy bodies	rs2640909	T	C	-0.056	0.0117919	2.044e-06	0.0487628	0.0409153	0.233341
Spine Osteoarthritis	Dementia with Lewy bodies	rs28495999	A	G	-0.0686	0.0141543	1.256e-06	0.0185948	0.0378549	0.623283
Spine Osteoarthritis	Dementia with Lewy bodies	rs34007448	T	G	0.0819	0.0161839	4.18e-07	0.0146386	0.0621437	0.813773
Spine Osteoarthritis	Dementia with Lewy bodies	rs4682707	A	G	0.0576	0.0118629	1.201e-06	0.0115899	0.0377216	0.758661
Spine Osteoarthritis	Dementia with Lewy bodies	rs61940788	A	G	-0.1918	0.0407479	2.514e-06	-0.0492758	0.137352	0.719784
Spine Osteoarthritis	Dementia with Lewy bodies	rs6685753	A	G	-0.0795	0.016366	1.188e-06	0.0786725	0.0608158	0.195785
Spine Osteoarthritis	Dementia with Lewy bodies	rs8180502	A	G	-0.0537	0.0108343	7.178e-07	0.000319949	0.0400218	0.993591
Spine Osteoarthritis	Dementia in Alzheimer disease	rs10043720	A	G	0.0593	0.0127173	3.117e-06	0.0185177	0.0262453	0.480462
Spine Osteoarthritis	Dementia in Alzheimer disease	rs10900550	T	C	0.0505	0.010703	2.378e-06	-0.00451346	0.0235213	0.84783
Spine Osteoarthritis	Dementia in Alzheimer disease	rs1104785	A	G	-0.0497	0.0100462	7.531e-07	0.043945	0.0228723	0.0546915
Spine Osteoarthritis	Dementia in Alzheimer disease	rs11058226	T	C	-0.0545	0.0115281	2.272e-06	-0.0316148	0.0290655	0.276725
Spine Osteoarthritis	Dementia in Alzheimer disease	rs11121639	A	G	0.1179	0.024328	1.258e-06	0.0801131	0.0382174	0.0360604
Spine Osteoarthritis	Dementia in Alzheimer disease	rs117175376	A	T	0.246	0.0524478	2.727e-06	-0.198213	0.146677	0.17658
Spine Osteoarthritis	Dementia in Alzheimer disease	rs117428541	T	C	0.1844	0.0380461	1.255e-06	0.0186763	0.0885814	0.833014
Spine Osteoarthritis	Dementia in Alzheimer disease	rs12310519	T	C	0.0766	0.0138917	3.506e-08	-0.0149594	0.0309035	0.628338
Spine Osteoarthritis	Dementia in Alzheimer disease	rs185195500	A	T	0.1168	0.0252954	3.885e-06	0.00923472	0.0459805	0.840824
Spine Osteoarthritis	Dementia in Alzheimer disease	rs201930306	T	G	0.1367	0.0280759	1.122e-06	0.104882	0.0558008	0.0601645
Spine Osteoarthritis	Dementia in Alzheimer disease	rs2640909	T	C	-0.056	0.0117919	2.044e-06	-0.0396561	0.0245882	0.106786
Spine Osteoarthritis	Dementia in Alzheimer disease	rs34007448	T	G	0.0819	0.0161839	4.18e-07	-0.0223389	0.0319088	0.483873
Spine Osteoarthritis	Dementia in Alzheimer disease	rs4682707	A	G	0.0576	0.0118629	1.201e-06	0.0414946	0.0236476	0.0793085
Spine Osteoarthritis	Dementia in Alzheimer disease	rs61940788	A	G	-0.1918	0.0407479	2.514e-06	-0.0256772	0.0858175	0.764783
Spine Osteoarthritis	Dementia in Alzheimer disease	rs6685753	A	G	-0.0795	0.016366	1.188e-06	-0.00182703	0.0350657	0.958447
Spine Osteoarthritis	Dementia in Alzheimer disease	rs8180502	A	G	-0.0537	0.0108343	7.178e-07	0.0134009	0.0237692	0.572896
Spine Osteoarthritis	Dementia	rs10043720	A	G	0.0593	0.0127173	3.117e-06	0.00402332	0.015732	0.798151
Spine Osteoarthritis	Dementia	rs10900550	T	C	0.0505	0.010703	2.378e-06	-0.0119224	0.0140505	0.396138
Spine Osteoarthritis	Dementia	rs1104785	A	G	-0.0497	0.0100462	7.531e-07	0.0141953	0.0136826	0.299515
Spine Osteoarthritis	Dementia	rs11058226	T	C	-0.0545	0.0115281	2.272e-06	0.00750584	0.0173359	0.66504
Spine Osteoarthritis	Dementia	rs11121639	A	G	0.1179	0.024328	1.258e-06	0.0465842	0.0227652	0.0407277
Spine Osteoarthritis	Dementia	rs117175376	A	T	0.246	0.0524478	2.727e-06	-0.132067	0.0876903	0.132051
Spine Osteoarthritis	Dementia	rs117428541	T	C	0.1844	0.0380461	1.255e-06	0.0140416	0.0529264	0.790775
Spine Osteoarthritis	Dementia	rs12310519	T	C	0.0766	0.0138917	3.506e-08	0.0022408	0.0185517	0.90386
Spine Osteoarthritis	Dementia	rs185195500	A	T	0.1168	0.0252954	3.885e-06	0.0131346	0.0276195	0.634392
Spine Osteoarthritis	Dementia	rs201930306	T	G	0.1367	0.0280759	1.122e-06	0.0460066	0.0334394	0.168877
Spine Osteoarthritis	Dementia	rs2640909	T	C	-0.056	0.0117919	2.044e-06	-0.00597468	0.0146692	0.683792
Spine Osteoarthritis	Dementia	rs34007448	T	G	0.0819	0.0161839	4.18e-07	-0.0131084	0.0191589	0.493853
Spine Osteoarthritis	Dementia	rs4682707	A	G	0.0576	0.0118629	1.201e-06	0.0151441	0.0141473	0.284412
Spine Osteoarthritis	Dementia	rs61940788	A	G	-0.1918	0.0407479	2.514e-06	0.0309709	0.0516354	0.548639
Spine Osteoarthritis	Dementia	rs6685753	A	G	-0.0795	0.016366	1.188e-06	-0.00605159	0.0209776	0.77298
Spine Osteoarthritis	Dementia	rs8180502	A	G	-0.0537	0.0108343	7.178e-07	0.0130852	0.0141996	0.35678
Spine Osteoarthritis	Unspecified dementia	rs10043720	A	G	0.0593	0.0127173	3.117e-06	0.0292123	0.0299402	0.32922
Spine Osteoarthritis	Unspecified dementia	rs10900550	T	C	0.0505	0.010703	2.378e-06	-0.0356861	0.0269621	0.185647
Spine Osteoarthritis	Unspecified dementia	rs1104785	A	G	-0.0497	0.0100462	7.531e-07	0.0146816	0.0262201	0.575521
Spine Osteoarthritis	Unspecified dementia	rs11058226	T	C	-0.0545	0.0115281	2.272e-06	0.0342233	0.0331537	0.301949
Spine Osteoarthritis	Unspecified dementia	rs11121639	A	G	0.1179	0.024328	1.258e-06	0.0521953	0.0439219	0.234689
Spine Osteoarthritis	Unspecified dementia	rs117175376	A	T	0.246	0.0524478	2.727e-06	-0.255557	0.16176	0.11414
Spine Osteoarthritis	Unspecified dementia	rs117428541	T	C	0.1844	0.0380461	1.255e-06	0.201862	0.102332	0.0485389
Spine Osteoarthritis	Unspecified dementia	rs12310519	T	C	0.0766	0.0138917	3.506e-08	-0.00943947	0.0354727	0.790158
Spine Osteoarthritis	Unspecified dementia	rs185195500	A	T	0.1168	0.0252954	3.885e-06	-0.0107572	0.0523144	0.837083
Spine Osteoarthritis	Unspecified dementia	rs201930306	T	G	0.1367	0.0280759	1.122e-06	0.0829967	0.0632892	0.189727
Spine Osteoarthritis	Unspecified dementia	rs2640909	T	C	-0.056	0.0117919	2.044e-06	-0.0140866	0.0282232	0.617699
Spine Osteoarthritis	Unspecified dementia	rs34007448	T	G	0.0819	0.0161839	4.18e-07	0.0392292	0.0368039	0.28647
Spine Osteoarthritis	Unspecified dementia	rs4682707	A	G	0.0576	0.0118629	1.201e-06	0.0143518	0.0271275	0.59677
Spine Osteoarthritis	Unspecified dementia	rs61940788	A	G	-0.1918	0.0407479	2.514e-06	-0.100938	0.101392	0.319485
Spine Osteoarthritis	Unspecified dementia	rs6685753	A	G	-0.0795	0.016366	1.188e-06	0.0171616	0.0403126	0.670317
Spine Osteoarthritis	Unspecified dementia	rs8180502	A	G	-0.0537	0.0108343	7.178e-07	0.0346367	0.027256	0.203802
Spine Osteoarthritis	Vascular dementia	rs10043720	A	G	0.0593	0.0127173	3.117e-06	0.00890425	0.0370827	0.810238
Spine Osteoarthritis	Vascular dementia	rs10900550	T	C	0.0505	0.010703	2.378e-06	-0.0157398	0.0333003	0.636455
Spine Osteoarthritis	Vascular dementia	rs1104785	A	G	-0.0497	0.0100462	7.531e-07	-0.0200312	0.0323916	0.536306
Spine Osteoarthritis	Vascular dementia	rs11058226	T	C	-0.0545	0.0115281	2.272e-06	0.0224576	0.0409976	0.583844
Spine Osteoarthritis	Vascular dementia	rs11121639	A	G	0.1179	0.024328	1.258e-06	0.0312577	0.0543591	0.565275
Spine Osteoarthritis	Vascular dementia	rs117175376	A	T	0.246	0.0524478	2.727e-06	-0.159127	0.202516	0.432014
Spine Osteoarthritis	Vascular dementia	rs117428541	T	C	0.1844	0.0380461	1.255e-06	0.151647	0.126846	0.231886
Spine Osteoarthritis	Vascular dementia	rs12310519	T	C	0.0766	0.0138917	3.506e-08	-0.025374	0.0436828	0.561328
Spine Osteoarthritis	Vascular dementia	rs185195500	A	T	0.1168	0.0252954	3.885e-06	0.062022	0.0648884	0.339161
Spine Osteoarthritis	Vascular dementia	rs201930306	T	G	0.1367	0.0280759	1.122e-06	0.0849754	0.0782401	0.277441
Spine Osteoarthritis	Vascular dementia	rs2640909	T	C	-0.056	0.0117919	2.044e-06	-0.00714091	0.0349348	0.838036
Spine Osteoarthritis	Vascular dementia	rs34007448	T	G	0.0819	0.0161839	4.18e-07	-0.000839155	0.0454438	0.985267
Spine Osteoarthritis	Vascular dementia	rs4682707	A	G	0.0576	0.0118629	1.201e-06	0.0228667	0.033507	0.494956
Spine Osteoarthritis	Vascular dementia	rs61940788	A	G	-0.1918	0.0407479	2.514e-06	0.0916524	0.125993	0.466955
Spine Osteoarthritis	Vascular dementia	rs6685753	A	G	-0.0795	0.016366	1.188e-06	0.0228806	0.0498784	0.646429
Spine Osteoarthritis	Vascular dementia	rs8180502	A	G	-0.0537	0.0108343	7.178e-07	0.0257611	0.0336952	0.444549
Spine Osteoarthritis	Frontotemporal dementia, wide, incl. Pick's disease	rs10043720	A	G	0.0593	0.0127173	3.117e-06	0.0872181	0.151923	0.565904
Spine Osteoarthritis	Frontotemporal dementia, wide, incl. Pick's disease	rs10900550	T	C	0.0505	0.010703	2.378e-06	-0.22902	0.135081	0.0899933
Spine Osteoarthritis	Frontotemporal dementia, wide, incl. Pick's disease	rs1104785	A	G	-0.0497	0.0100462	7.531e-07	-0.175625	0.130478	0.178297
Spine Osteoarthritis	Frontotemporal dementia, wide, incl. Pick's disease	rs11058226	T	C	-0.0545	0.0115281	2.272e-06	-0.0278437	0.165837	0.866663
Spine Osteoarthritis	Frontotemporal dementia, wide, incl. Pick's disease	rs11121639	A	G	0.1179	0.024328	1.258e-06	-0.0534452	0.215896	0.804482
Spine Osteoarthritis	Frontotemporal dementia, wide, incl. Pick's disease	rs117428541	T	C	0.1844	0.0380461	1.255e-06	0.258123	0.508021	0.611385
Spine Osteoarthritis	Frontotemporal dementia, wide, incl. Pick's disease	rs12310519	T	C	0.0766	0.0138917	3.506e-08	-0.0967089	0.178407	0.587771
Spine Osteoarthritis	Frontotemporal dementia, wide, incl. Pick's disease	rs201930306	T	G	0.1367	0.0280759	1.122e-06	0.0985702	0.325041	0.761697
Spine Osteoarthritis	Frontotemporal dementia, wide, incl. Pick's disease	rs2640909	T	C	-0.056	0.0117919	2.044e-06	-0.0224112	0.140688	0.873435
Spine Osteoarthritis	Frontotemporal dementia, wide, incl. Pick's disease	rs4682707	A	G	0.0576	0.0118629	1.201e-06	0.110725	0.135747	0.414687
Spine Osteoarthritis	Frontotemporal dementia, wide, incl. Pick's disease	rs61940788	A	G	-0.1918	0.0407479	2.514e-06	-0.536938	0.443046	0.225541
Spine Osteoarthritis	Frontotemporal dementia, wide, incl. Pick's disease	rs6685753	A	G	-0.0795	0.016366	1.188e-06	-0.170179	0.199939	0.394685
Spine Osteoarthritis	Frontotemporal dementia, wide, incl. Pick's disease	rs8180502	A	G	-0.0537	0.0108343	7.178e-07	-0.0531284	0.135593	0.695188
Rheumatoid arthritis	Dementia with Lewy bodies	rs10065637	T	C	-0.221101	0.0400799	3.45831e-08	-0.0349424	0.0444415	0.431717
Rheumatoid arthritis	Dementia with Lewy bodies	rs189070938	A	T	0.825232	0.136881	1.65132e-09	-0.208834	0.128779	0.104879
Rheumatoid arthritis	Dementia with Lewy bodies	rs6910879	G	A	0.917643	0.0678156	1.02005e-41	0.111228	0.174363	0.523537
Rheumatoid arthritis	Dementia with Lewy bodies	rs9275602	A	C	0.350775	0.0413172	2.06957e-17	-0.0154579	0.052277	0.767462
Rheumatoid arthritis	Dementia in Alzheimer disease	rs10065637	T	C	-0.221101	0.0400799	3.45831e-08	0.0243243	0.0330141	0.461253
Rheumatoid arthritis	Dementia in Alzheimer disease	rs2476601	A	G	0.4218	0.0551672	2.07574e-14	0.0080942	0.0325693	0.80373
Rheumatoid arthritis	Dementia in Alzheimer disease	rs35511257	C	G	1.07742	0.0704771	9.26668e-53	-0.125832	0.174169	0.470007
Rheumatoid arthritis	Dementia in Alzheimer disease	rs6910879	G	A	0.917643	0.0678156	1.02005e-41	0.239706	0.166663	0.15036
Rheumatoid arthritis	Dementia in Alzheimer disease	rs9275602	A	C	0.350775	0.0413172	2.06957e-17	-0.0238002	0.0317629	0.45367
Rheumatoid arthritis	Dementia	rs10065637	T	C	-0.221101	0.0400799	3.45831e-08	0.0164871	0.0197207	0.403139
Rheumatoid arthritis	Dementia	rs2476601	A	G	0.4218	0.0551672	2.07574e-14	0.0170322	0.0194272	0.380639
Rheumatoid arthritis	Dementia	rs35511257	C	G	1.07742	0.0704771	9.26668e-53	-0.087207	0.107436	0.416956
Rheumatoid arthritis	Dementia	rs6910879	G	A	0.917643	0.0678156	1.02005e-41	0.0271784	0.0994032	0.784533
Rheumatoid arthritis	Dementia	rs9275602	A	C	0.350775	0.0413172	2.06957e-17	-0.0278995	0.0189631	0.141222
Rheumatoid arthritis	Unspecified dementia	rs10065637	T	C	-0.221101	0.0400799	3.45831e-08	0.0612512	0.037959	0.106611
Rheumatoid arthritis	Unspecified dementia	rs2476601	A	G	0.4218	0.0551672	2.07574e-14	-0.0470457	0.0375115	0.209781
Rheumatoid arthritis	Unspecified dementia	rs35511257	C	G	1.07742	0.0704771	9.26668e-53	-0.185481	0.198369	0.349772
Rheumatoid arthritis	Unspecified dementia	rs6910879	G	A	0.917643	0.0678156	1.02005e-41	-0.324005	0.196045	0.0983898
Rheumatoid arthritis	Unspecified dementia	rs9275602	A	C	0.350775	0.0413172	2.06957e-17	-0.0664636	0.0363536	0.0675118
Rheumatoid arthritis	Vascular dementia	rs10065637	T	C	-0.221101	0.0400799	3.45831e-08	-0.0315561	0.0470715	0.502611
Rheumatoid arthritis	Vascular dementia	rs2476601	A	G	0.4218	0.0551672	2.07574e-14	-0.0267584	0.046238	0.562784
Rheumatoid arthritis	Vascular dementia	rs35511257	C	G	1.07742	0.0704771	9.26668e-53	-0.0171127	0.244061	0.944101
Rheumatoid arthritis	Vascular dementia	rs6910879	G	A	0.917643	0.0678156	1.02005e-41	-0.0387318	0.23414	0.868612
Rheumatoid arthritis	Vascular dementia	rs9275602	A	C	0.350775	0.0413172	2.06957e-17	-0.046569	0.0448714	0.299348
Rheumatoid arthritis	Frontotemporal dementia, wide, incl. Pick's disease	rs10065637	T	C	-0.221101	0.0400799	3.45831e-08	0.163031	0.190809	0.392873
Rheumatoid arthritis	Frontotemporal dementia, wide, incl. Pick's disease	rs2476601	A	G	0.4218	0.0551672	2.07574e-14	-0.224159	0.183975	0.223063
Rheumatoid arthritis	Frontotemporal dementia, wide, incl. Pick's disease	rs35511257	C	G	1.07742	0.0704771	9.26668e-53	-0.259952	1.03691	0.802047
Rheumatoid arthritis	Frontotemporal dementia, wide, incl. Pick's disease	rs6910879	G	A	0.917643	0.0678156	1.02005e-41	-1.00904	0.941973	0.284079
Rheumatoid arthritis	Frontotemporal dementia, wide, incl. Pick's disease	rs9275602	A	C	0.350775	0.0413172	2.06957e-17	-0.184998	0.182553	0.310871
Rheumatoid arthritis	Frontotemporal dementia, wide, incl. Pick's disease	rs9275602	A	C	0.350775	0.0413172	2.06957e-17	-0.184998	0.182553	0.310871
Seronegative rheumatoid arthritis	Dementia with Lewy bodies	rs11513729	T	C	0.147252	0.0247334	2.62374e-09	-0.00211423	0.0376866	0.95527
Seronegative rheumatoid arthritis	Dementia with Lewy bodies	rs1374426	T	C	0.151286	0.0265592	1.22512e-08	-0.00644875	0.0483633	0.893919
Seronegative rheumatoid arthritis	Dementia in Alzheimer disease	rs1132988	T	A	-0.222617	0.036092	6.91433e-10	0.0185688	0.0323457	0.565917
Seronegative rheumatoid arthritis	Dementia in Alzheimer disease	rs11513729	T	C	0.147252	0.0247334	2.62374e-09	-0.00724129	0.0234463	0.757438
Seronegative rheumatoid arthritis	Dementia in Alzheimer disease	rs1374426	T	C	0.151286	0.0265592	1.22512e-08	0.00580877	0.0254368	0.819365
Seronegative rheumatoid arthritis	Dementia in Alzheimer disease	rs145575084	C	G	0.662414	0.0377678	7.20278e-69	-0.0107287	0.0426319	0.801305
Seronegative rheumatoid arthritis	Dementia in Alzheimer disease	rs17612852	A	G	0.384548	0.028524	2.00771e-41	-0.0127372	0.0255644	0.618315
Seronegative rheumatoid arthritis	Dementia in Alzheimer disease	rs2476601	G	A	-0.266974	0.0320869	8.77001e-17	-0.0080942	0.0325693	0.80373
Seronegative rheumatoid arthritis	Dementia in Alzheimer disease	rs36229731	C	A	0.236605	0.0287235	1.76076e-16	0.0420088	0.0283247	0.138044
Seronegative rheumatoid arthritis	Dementia	rs1132988	T	A	-0.222617	0.036092	6.91433e-10	0.0309754	0.0194347	0.110976
Seronegative rheumatoid arthritis	Dementia	rs11513729	T	C	0.147252	0.0247334	2.62374e-09	0.00771921	0.0140466	0.582632
Seronegative rheumatoid arthritis	Dementia	rs1374426	T	C	0.151286	0.0265592	1.22512e-08	0.0158964	0.0152428	0.297007
Seronegative rheumatoid arthritis	Dementia	rs145575084	C	G	0.662414	0.0377678	7.20278e-69	0.0187639	0.0253419	0.459038
Seronegative rheumatoid arthritis	Dementia	rs17612852	A	G	0.384548	0.028524	2.00771e-41	-0.0141799	0.0153448	0.355444
Seronegative rheumatoid arthritis	Dementia	rs2476601	G	A	-0.266974	0.0320869	8.77001e-17	-0.0170322	0.0194272	0.380639
Seronegative rheumatoid arthritis	Dementia	rs36229731	C	A	0.236605	0.0287235	1.76076e-16	0.0277228	0.016927	0.101466
Seronegative rheumatoid arthritis	Unspecified dementia	rs1132988	T	A	-0.222617	0.036092	6.91433e-10	0.0633299	0.0372967	0.0895076
Seronegative rheumatoid arthritis	Unspecified dementia	rs11513729	T	C	0.147252	0.0247334	2.62374e-09	0.0123003	0.0269633	0.648255
Seronegative rheumatoid arthritis	Unspecified dementia	rs1374426	T	C	0.151286	0.0265592	1.22512e-08	0.01673	0.029304	0.568061
Seronegative rheumatoid arthritis	Unspecified dementia	rs145575084	C	G	0.662414	0.0377678	7.20278e-69	0.0765098	0.0484463	0.114274
Seronegative rheumatoid arthritis	Unspecified dementia	rs17612852	A	G	0.384548	0.028524	2.00771e-41	-0.0261536	0.0293176	0.372351
Seronegative rheumatoid arthritis	Unspecified dementia	rs2476601	G	A	-0.266974	0.0320869	8.77001e-17	0.0470457	0.0375115	0.209781
Seronegative rheumatoid arthritis	Unspecified dementia	rs36229731	C	A	0.236605	0.0287235	1.76076e-16	0.0318488	0.032727	0.330471
Seronegative rheumatoid arthritis	Vascular dementia	rs1132988	T	A	-0.222617	0.036092	6.91433e-10	0.05113	0.0460319	0.266675
Seronegative rheumatoid arthritis	Vascular dementia	rs11513729	T	C	0.147252	0.0247334	2.62374e-09	-0.0132567	0.0333768	0.691234
Seronegative rheumatoid arthritis	Vascular dementia	rs1374426	T	C	0.151286	0.0265592	1.22512e-08	-0.00334529	0.0360774	0.926122
Seronegative rheumatoid arthritis	Vascular dementia	rs145575084	C	G	0.662414	0.0377678	7.20278e-69	0.075446	0.0606213	0.213299
Seronegative rheumatoid arthritis	Vascular dementia	rs17612852	A	G	0.384548	0.028524	2.00771e-41	-0.0180501	0.0362806	0.618827
Seronegative rheumatoid arthritis	Vascular dementia	rs2476601	G	A	-0.266974	0.0320869	8.77001e-17	0.0267584	0.046238	0.562784
Seronegative rheumatoid arthritis	Vascular dementia	rs36229731	C	A	0.236605	0.0287235	1.76076e-16	0.0209954	0.0404144	0.603411
Seronegative rheumatoid arthritis	Frontotemporal dementia, wide, incl. Pick's disease	rs1132988	T	A	-0.222617	0.036092	6.91433e-10	0.0844601	0.186889	0.651321
Seronegative rheumatoid arthritis	Frontotemporal dementia, wide, incl. Pick's disease	rs11513729	T	C	0.147252	0.0247334	2.62374e-09	0.0640385	0.133712	0.631988
Seronegative rheumatoid arthritis	Frontotemporal dementia, wide, incl. Pick's disease	rs1374426	T	C	0.151286	0.0265592	1.22512e-08	-0.0888005	0.144996	0.54025
Seronegative rheumatoid arthritis	Frontotemporal dementia, wide, incl. Pick's disease	rs145575084	C	G	0.662414	0.0377678	7.20278e-69	-0.605554	0.242103	0.0123763
Seronegative rheumatoid arthritis	Frontotemporal dementia, wide, incl. Pick's disease	rs17612852	A	G	0.384548	0.028524	2.00771e-41	-0.161118	0.147081	0.273324
Seronegative rheumatoid arthritis	Frontotemporal dementia, wide, incl. Pick's disease	rs2476601	G	A	-0.266974	0.0320869	8.77001e-17	0.224159	0.183975	0.223063
Seronegative rheumatoid arthritis	Frontotemporal dementia, wide, incl. Pick's disease	rs36229731	C	A	0.236605	0.0287235	1.76076e-16	-0.112987	0.161233	0.483446
Seropositive rheumatoid arthritis, wide	Dementia with Lewy bodies	rs10174238	A	G	-0.115206	0.0183797	3.65384e-10	0.0159891	0.0440649	0.716717
Seropositive rheumatoid arthritis, wide	Dementia with Lewy bodies	rs10517086	A	G	0.101788	0.0173405	4.35943e-09	-0.00446495	0.0408999	0.91307
Seropositive rheumatoid arthritis, wide	Dementia with Lewy bodies	rs117753409	A	C	0.152737	0.027157	1.86342e-08	-0.0418746	0.122049	0.731525
Seropositive rheumatoid arthritis, wide	Dementia with Lewy bodies	rs13180950	C	T	0.123808	0.0214552	7.90296e-09	0.0351355	0.0505876	0.487285
Seropositive rheumatoid arthritis, wide	Dementia with Lewy bodies	rs144835716	T	A	0.62111	0.0348244	3.74887e-71	-0.0244249	0.163374	0.881157
Seropositive rheumatoid arthritis, wide	Dementia with Lewy bodies	rs1571878	T	C	-0.118078	0.0159094	1.15478e-13	0.00469199	0.0371406	0.899477
Seropositive rheumatoid arthritis, wide	Dementia with Lewy bodies	rs1957569	G	A	-0.0944257	0.0172945	4.76475e-08	0.0405852	0.0393631	0.302463
Seropositive rheumatoid arthritis, wide	Dementia with Lewy bodies	rs2013002	C	T	-0.111923	0.0161996	4.88203e-12	0.00259135	0.0377527	0.945271
Seropositive rheumatoid arthritis, wide	Dementia with Lewy bodies	rs2144016	G	A	-0.325161	0.0190602	2.96142e-65	0.0291024	0.0425581	0.494135
Seropositive rheumatoid arthritis, wide	Dementia with Lewy bodies	rs34536443	C	G	-0.438459	0.0526539	8.27942e-17	-0.14371	0.0916641	0.116931
Seropositive rheumatoid arthritis, wide	Dementia with Lewy bodies	rs60600003	G	T	0.147392	0.0253979	6.5016e-09	0.0284708	0.0609035	0.6402
Seropositive rheumatoid arthritis, wide	Dementia with Lewy bodies	rs72849211	G	C	0.203785	0.0224336	1.04761e-19	-0.0272633	0.0725485	0.707069
Seropositive rheumatoid arthritis, wide	Dementia with Lewy bodies	rs78782944	T	C	0.147923	0.0261696	1.58143e-08	-0.0312079	0.0750946	0.677713
Seropositive rheumatoid arthritis, wide	Dementia in Alzheimer disease	rs10174238	A	G	-0.115206	0.0183797	3.65384e-10	0.0304271	0.0269389	0.258691
Seropositive rheumatoid arthritis, wide	Dementia in Alzheimer disease	rs1024162	T	A	-0.13348	0.0171949	8.30998e-15	-0.0160457	0.0242578	0.508315
Seropositive rheumatoid arthritis, wide	Dementia in Alzheimer disease	rs10517086	A	G	0.101788	0.0173405	4.35943e-09	-0.0267702	0.0252095	0.288278
Seropositive rheumatoid arthritis, wide	Dementia in Alzheimer disease	rs113076234	A	G	0.112888	0.020389	3.08163e-08	0.0564229	0.030039	0.0603365
Seropositive rheumatoid arthritis, wide	Dementia in Alzheimer disease	rs117753409	A	C	0.152737	0.027157	1.86342e-08	0.048166	0.0410251	0.24037
Seropositive rheumatoid arthritis, wide	Dementia in Alzheimer disease	rs13180950	C	T	0.123808	0.0214552	7.90296e-09	-0.0257978	0.0317694	0.416773
Seropositive rheumatoid arthritis, wide	Dementia in Alzheimer disease	rs144835716	T	A	0.62111	0.0348244	3.74887e-71	-0.0109884	0.0614288	0.858031
Seropositive rheumatoid arthritis, wide	Dementia in Alzheimer disease	rs1571878	T	C	-0.118078	0.0159094	1.15478e-13	-0.0289214	0.0229408	0.207419
Seropositive rheumatoid arthritis, wide	Dementia in Alzheimer disease	rs1957569	G	A	-0.0944257	0.0172945	4.76475e-08	-0.0322012	0.0245681	0.189961
Seropositive rheumatoid arthritis, wide	Dementia in Alzheimer disease	rs2013002	C	T	-0.111923	0.0161996	4.88203e-12	0.00196493	0.0234232	0.933146
Seropositive rheumatoid arthritis, wide	Dementia in Alzheimer disease	rs2144016	G	A	-0.325161	0.0190602	2.96142e-65	-0.0336827	0.0264462	0.202794
Seropositive rheumatoid arthritis, wide	Dementia in Alzheimer disease	rs2395269	G	T	-0.198634	0.0201729	7.09251e-23	-0.0122646	0.027966	0.660986
Seropositive rheumatoid arthritis, wide	Dementia in Alzheimer disease	rs2476601	G	A	-0.406337	0.0202233	8.5842e-90	-0.0080942	0.0325693	0.80373
Seropositive rheumatoid arthritis, wide	Dementia in Alzheimer disease	rs28579922	A	G	-0.669912	0.0276263	6.77642e-130	0.019957	0.034064	0.557964
Seropositive rheumatoid arthritis, wide	Dementia in Alzheimer disease	rs3118470	C	T	0.0919558	0.015938	7.94603e-09	0.0131789	0.0230101	0.566818
Seropositive rheumatoid arthritis, wide	Dementia in Alzheimer disease	rs34536443	C	G	-0.438459	0.0526539	8.27942e-17	-0.0324317	0.065417	0.620058
Seropositive rheumatoid arthritis, wide	Dementia in Alzheimer disease	rs60600003	G	T	0.147392	0.0253979	6.5016e-09	0.0360066	0.037963	0.342892
Seropositive rheumatoid arthritis, wide	Dementia in Alzheimer disease	rs72849211	G	C	0.203785	0.0224336	1.04761e-19	0.0601379	0.0342542	0.0791498
Seropositive rheumatoid arthritis, wide	Dementia in Alzheimer disease	rs7453967	T	G	0.230301	0.022602	2.21106e-24	0.0184067	0.0308442	0.550666
Seropositive rheumatoid arthritis, wide	Dementia in Alzheimer disease	rs78782944	T	C	0.147923	0.0261696	1.58143e-08	0.00364124	0.0391791	0.925952
Seropositive rheumatoid arthritis, wide	Dementia	rs10174238	A	G	-0.115206	0.0183797	3.65384e-10	0.0140075	0.016145	0.385611
Seropositive rheumatoid arthritis, wide	Dementia	rs1024162	T	A	-0.13348	0.0171949	8.30998e-15	-0.0303818	0.0145296	0.036525
Seropositive rheumatoid arthritis, wide	Dementia	rs10517086	A	G	0.101788	0.0173405	4.35943e-09	-0.00312218	0.0151058	0.836254
Seropositive rheumatoid arthritis, wide	Dementia	rs113076234	A	G	0.112888	0.020389	3.08163e-08	0.0131522	0.0179463	0.463641
Seropositive rheumatoid arthritis, wide	Dementia	rs117753409	A	C	0.152737	0.027157	1.86342e-08	0.012249	0.0245939	0.618449
Seropositive rheumatoid arthritis, wide	Dementia	rs13180950	C	T	0.123808	0.0214552	7.90296e-09	0.0381718	0.0189009	0.043428
Seropositive rheumatoid arthritis, wide	Dementia	rs144835716	T	A	0.62111	0.0348244	3.74887e-71	0.0106766	0.0366255	0.770662
Seropositive rheumatoid arthritis, wide	Dementia	rs1571878	T	C	-0.118078	0.0159094	1.15478e-13	-0.00101384	0.0137405	0.941182
Seropositive rheumatoid arthritis, wide	Dementia	rs1957569	G	A	-0.0944257	0.0172945	4.76475e-08	-0.0199679	0.0147469	0.175724
Seropositive rheumatoid arthritis, wide	Dementia	rs2013002	C	T	-0.111923	0.0161996	4.88203e-12	-0.0112456	0.0140344	0.422968
Seropositive rheumatoid arthritis, wide	Dementia	rs2144016	G	A	-0.325161	0.0190602	2.96142e-65	0.00150904	0.0157915	0.92387
Seropositive rheumatoid arthritis, wide	Dementia	rs2395269	G	T	-0.198634	0.0201729	7.09251e-23	0.0122454	0.0167581	0.464954
Seropositive rheumatoid arthritis, wide	Dementia	rs2476601	G	A	-0.406337	0.0202233	8.5842e-90	-0.0170322	0.0194272	0.380639
Seropositive rheumatoid arthritis, wide	Dementia	rs28579922	A	G	-0.669912	0.0276263	6.77642e-130	-0.0163852	0.0204895	0.423891
Seropositive rheumatoid arthritis, wide	Dementia	rs3118470	C	T	0.0919558	0.015938	7.94603e-09	0.010421	0.0137617	0.448899
Seropositive rheumatoid arthritis, wide	Dementia	rs34536443	C	G	-0.438459	0.0526539	8.27942e-17	-0.017519	0.0394632	0.657092
Seropositive rheumatoid arthritis, wide	Dementia	rs60600003	G	T	0.147392	0.0253979	6.5016e-09	0.00103106	0.0226446	0.963683
Seropositive rheumatoid arthritis, wide	Dementia	rs72849211	G	C	0.203785	0.0224336	1.04761e-19	0.0471593	0.0203952	0.020763
Seropositive rheumatoid arthritis, wide	Dementia	rs7453967	T	G	0.230301	0.022602	2.21106e-24	-0.0342791	0.0184375	0.062997
Seropositive rheumatoid arthritis, wide	Dementia	rs78782944	T	C	0.147923	0.0261696	1.58143e-08	-0.0111797	0.0233363	0.631889
Seropositive rheumatoid arthritis, wide	Unspecified dementia	rs10174238	A	G	-0.115206	0.0183797	3.65384e-10	0.0382366	0.030897	0.215883
Seropositive rheumatoid arthritis, wide	Unspecified dementia	rs10517086	A	G	0.101788	0.0173405	4.35943e-09	-0.0423213	0.0290411	0.145037
Seropositive rheumatoid arthritis, wide	Unspecified dementia	rs113076234	A	G	0.112888	0.020389	3.08163e-08	0.00198431	0.0343589	0.953946
Seropositive rheumatoid arthritis, wide	Unspecified dementia	rs117753409	A	C	0.152737	0.027157	1.86342e-08	0.0590101	0.0476877	0.215929
Seropositive rheumatoid arthritis, wide	Unspecified dementia	rs13180950	C	T	0.123808	0.0214552	7.90296e-09	-0.00228385	0.0362586	0.949776
Seropositive rheumatoid arthritis, wide	Unspecified dementia	rs144835716	T	A	0.62111	0.0348244	3.74887e-71	0.0839545	0.0710659	0.237459
Seropositive rheumatoid arthritis, wide	Unspecified dementia	rs1571878	T	C	-0.118078	0.0159094	1.15478e-13	-0.00307845	0.0262967	0.906808
Seropositive rheumatoid arthritis, wide	Unspecified dementia	rs1957569	G	A	-0.0944257	0.0172945	4.76475e-08	-0.0136525	0.0282998	0.629505
Seropositive rheumatoid arthritis, wide	Unspecified dementia	rs2013002	C	T	-0.111923	0.0161996	4.88203e-12	-0.0129044	0.0269463	0.632016
Seropositive rheumatoid arthritis, wide	Unspecified dementia	rs2144016	G	A	-0.325161	0.0190602	2.96142e-65	-0.0423518	0.0304229	0.163891
Seropositive rheumatoid arthritis, wide	Unspecified dementia	rs2395269	G	T	-0.198634	0.0201729	7.09251e-23	0.0256446	0.0321101	0.424495
Seropositive rheumatoid arthritis, wide	Unspecified dementia	rs2476601	G	A	-0.406337	0.0202233	8.5842e-90	0.0470457	0.0375115	0.209781
Seropositive rheumatoid arthritis, wide	Unspecified dementia	rs28579922	A	G	-0.669912	0.0276263	6.77642e-130	0.0286586	0.0390043	0.462489
Seropositive rheumatoid arthritis, wide	Unspecified dementia	rs3118470	C	T	0.0919558	0.015938	7.94603e-09	-0.0184247	0.026456	0.486161
Seropositive rheumatoid arthritis, wide	Unspecified dementia	rs34536443	C	G	-0.438459	0.0526539	8.27942e-17	-0.0833811	0.0758194	0.271448
Seropositive rheumatoid arthritis, wide	Unspecified dementia	rs60600003	G	T	0.147392	0.0253979	6.5016e-09	0.00118151	0.0431992	0.97818
Seropositive rheumatoid arthritis, wide	Unspecified dementia	rs78782944	T	C	0.147923	0.0261696	1.58143e-08	0.00585612	0.0447089	0.895788
Seropositive rheumatoid arthritis, wide	Vascular dementia	rs10174238	A	G	-0.115206	0.0183797	3.65384e-10	-0.00338088	0.038202	0.929479
Seropositive rheumatoid arthritis, wide	Vascular dementia	rs1024162	T	A	-0.13348	0.0171949	8.30998e-15	-0.0383799	0.0343485	0.263837
Seropositive rheumatoid arthritis, wide	Vascular dementia	rs10517086	A	G	0.101788	0.0173405	4.35943e-09	0.0469868	0.0357614	0.188882
Seropositive rheumatoid arthritis, wide	Vascular dementia	rs113076234	A	G	0.112888	0.020389	3.08163e-08	-0.0025876	0.042443	0.951386
Seropositive rheumatoid arthritis, wide	Vascular dementia	rs117753409	A	C	0.152737	0.027157	1.86342e-08	-0.0214987	0.0588381	0.714822
Seropositive rheumatoid arthritis, wide	Vascular dementia	rs13180950	C	T	0.123808	0.0214552	7.90296e-09	0.0578122	0.0447412	0.196307
Seropositive rheumatoid arthritis, wide	Vascular dementia	rs144835716	T	A	0.62111	0.0348244	3.74887e-71	0.0859393	0.0881639	0.329675
Seropositive rheumatoid arthritis, wide	Vascular dementia	rs1571878	T	C	-0.118078	0.0159094	1.15478e-13	-0.0207936	0.0325305	0.522691
Seropositive rheumatoid arthritis, wide	Vascular dementia	rs1957569	G	A	-0.0944257	0.0172945	4.76475e-08	-0.0157033	0.0349997	0.653669
Seropositive rheumatoid arthritis, wide	Vascular dementia	rs2013002	C	T	-0.111923	0.0161996	4.88203e-12	0.00800953	0.0333534	0.810221
Seropositive rheumatoid arthritis, wide	Vascular dementia	rs2144016	G	A	-0.325161	0.0190602	2.96142e-65	0.0569193	0.0375209	0.129266
Seropositive rheumatoid arthritis, wide	Vascular dementia	rs2395269	G	T	-0.198634	0.0201729	7.09251e-23	0.00558605	0.0396572	0.887982
Seropositive rheumatoid arthritis, wide	Vascular dementia	rs2476601	G	A	-0.406337	0.0202233	8.5842e-90	0.0267584	0.046238	0.562784
Seropositive rheumatoid arthritis, wide	Vascular dementia	rs28579922	A	G	-0.669912	0.0276263	6.77642e-130	0.00868905	0.048199	0.856937
Seropositive rheumatoid arthritis, wide	Vascular dementia	rs3118470	C	T	0.0919558	0.015938	7.94603e-09	0.025436	0.0326828	0.43641
Seropositive rheumatoid arthritis, wide	Vascular dementia	rs34536443	C	G	-0.438459	0.0526539	8.27942e-17	-0.0171213	0.0932611	0.854339
Seropositive rheumatoid arthritis, wide	Vascular dementia	rs60600003	G	T	0.147392	0.0253979	6.5016e-09	0.0381393	0.0536889	0.47747
Seropositive rheumatoid arthritis, wide	Vascular dementia	rs72849211	G	C	0.203785	0.0224336	1.04761e-19	0.0259456	0.0490888	0.597122
Seropositive rheumatoid arthritis, wide	Vascular dementia	rs7453967	T	G	0.230301	0.022602	2.21106e-24	-0.0143925	0.0438353	0.742662
Seropositive rheumatoid arthritis, wide	Vascular dementia	rs78782944	T	C	0.147923	0.0261696	1.58143e-08	0.0623688	0.0554696	0.260853
Seropositive rheumatoid arthritis, wide	Frontotemporal dementia, wide, incl. Pick's disease	rs10174238	A	G	-0.115206	0.0183797	3.65384e-10	0.0213788	0.153736	0.889401
Seropositive rheumatoid arthritis, wide	Frontotemporal dementia, wide, incl. Pick's disease	rs1024162	T	A	-0.13348	0.0171949	8.30998e-15	0.0495291	0.139687	0.72291
Seropositive rheumatoid arthritis, wide	Frontotemporal dementia, wide, incl. Pick's disease	rs10517086	A	G	0.101788	0.0173405	4.35943e-09	-0.0284491	0.14472	0.844157
Seropositive rheumatoid arthritis, wide	Frontotemporal dementia, wide, incl. Pick's disease	rs113076234	A	G	0.112888	0.020389	3.08163e-08	-0.111	0.171727	0.518036
Seropositive rheumatoid arthritis, wide	Frontotemporal dementia, wide, incl. Pick's disease	rs117753409	A	C	0.152737	0.027157	1.86342e-08	0.223464	0.230141	0.331555
Seropositive rheumatoid arthritis, wide	Frontotemporal dementia, wide, incl. Pick's disease	rs13180950	C	T	0.123808	0.0214552	7.90296e-09	-0.129608	0.182715	0.47811
Seropositive rheumatoid arthritis, wide	Frontotemporal dementia, wide, incl. Pick's disease	rs144835716	T	A	0.62111	0.0348244	3.74887e-71	-0.182893	0.349707	0.600983
Seropositive rheumatoid arthritis, wide	Frontotemporal dementia, wide, incl. Pick's disease	rs1571878	T	C	-0.118078	0.0159094	1.15478e-13	0.0948738	0.13145	0.470448
Seropositive rheumatoid arthritis, wide	Frontotemporal dementia, wide, incl. Pick's disease	rs1957569	G	A	-0.0944257	0.0172945	4.76475e-08	0.0745357	0.141434	0.598194
Seropositive rheumatoid arthritis, wide	Frontotemporal dementia, wide, incl. Pick's disease	rs2013002	C	T	-0.111923	0.0161996	4.88203e-12	-0.0631375	0.133657	0.63665
Seropositive rheumatoid arthritis, wide	Frontotemporal dementia, wide, incl. Pick's disease	rs2144016	G	A	-0.325161	0.0190602	2.96142e-65	-0.00400429	0.150551	0.978781
Seropositive rheumatoid arthritis, wide	Frontotemporal dementia, wide, incl. Pick's disease	rs2395269	G	T	-0.198634	0.0201729	7.09251e-23	0.190425	0.161393	0.238048
Seropositive rheumatoid arthritis, wide	Frontotemporal dementia, wide, incl. Pick's disease	rs2476601	G	A	-0.406337	0.0202233	8.5842e-90	0.224159	0.183975	0.223063
Seropositive rheumatoid arthritis, wide	Frontotemporal dementia, wide, incl. Pick's disease	rs28579922	A	G	-0.669912	0.0276263	6.77642e-130	0.0309793	0.198378	0.875904
Seropositive rheumatoid arthritis, wide	Frontotemporal dementia, wide, incl. Pick's disease	rs3118470	C	T	0.0919558	0.015938	7.94603e-09	0.0457419	0.131671	0.728294
Seropositive rheumatoid arthritis, wide	Frontotemporal dementia, wide, incl. Pick's disease	rs34536443	C	G	-0.438459	0.0526539	8.27942e-17	-0.123812	0.374049	0.740641
Seropositive rheumatoid arthritis, wide	Frontotemporal dementia, wide, incl. Pick's disease	rs60600003	G	T	0.147392	0.0253979	6.5016e-09	-0.0401653	0.216846	0.853053
Seropositive rheumatoid arthritis, wide	Frontotemporal dementia, wide, incl. Pick's disease	rs72849211	G	C	0.203785	0.0224336	1.04761e-19	-0.246958	0.191827	0.197956
Seropositive rheumatoid arthritis, wide	Frontotemporal dementia, wide, incl. Pick's disease	rs7453967	T	G	0.230301	0.022602	2.21106e-24	-0.356965	0.177888	0.0447837
Seropositive rheumatoid arthritis, wide	Frontotemporal dementia, wide, incl. Pick's disease	rs78782944	T	C	0.147923	0.0261696	1.58143e-08	-0.179657	0.22202	0.418405
Ankylosing spondylitis	Dementia with Lewy bodies	rs118052498	G	A	2.04682	0.445804	4.40508e-06	0.0866913	0.138576	0.531568
Ankylosing spondylitis	Dementia with Lewy bodies	rs148257298	T	C	2.81839	0.598562	2.49427e-06	0.0926703	0.160098	0.562707
Ankylosing spondylitis	Dementia with Lewy bodies	rs285761	G	A	0.526153	0.114138	4.03038e-06	0.0147113	0.0397312	0.711096
Ankylosing spondylitis	Dementia with Lewy bodies	rs34361513	A	G	1.54753	0.337103	4.41813e-06	0.225046	0.105862	0.0335158
Ankylosing spondylitis	Dementia with Lewy bodies	rs4151651	A	G	2.79167	0.34677	8.24682e-16	0.0275276	0.101385	0.785997
Ankylosing spondylitis	Dementia with Lewy bodies	rs693196	T	C	0.578329	0.121333	1.87507e-06	0.022935	0.0429642	0.593491
Ankylosing spondylitis	Dementia with Lewy bodies	rs78091800	C	G	3.00891	0.539843	2.49417e-08	0.336579	0.146378	0.0214823
Ankylosing spondylitis	Dementia with Lewy bodies	rs80221354	T	C	2.00776	0.37107	6.27705e-08	-0.0771014	0.109585	0.481698
Ankylosing spondylitis	Dementia in Alzheimer disease	rs118052498	G	A	2.04682	0.445804	4.40508e-06	0.139282	0.116563	0.232123
Ankylosing spondylitis	Dementia in Alzheimer disease	rs139932310	T	C	3.34779	0.724665	3.84156e-06	-0.108758	0.119341	0.362126
Ankylosing spondylitis	Dementia in Alzheimer disease	rs148257298	T	C	2.81839	0.598562	2.49427e-06	0.113761	0.2462	0.644033
Ankylosing spondylitis	Dementia in Alzheimer disease	rs285761	G	A	0.526153	0.114138	4.03038e-06	-0.0108926	0.0262019	0.677617
Ankylosing spondylitis	Dementia in Alzheimer disease	rs34361513	A	G	1.54753	0.337103	4.41813e-06	0.00298122	0.0652162	0.963539
Ankylosing spondylitis	Dementia in Alzheimer disease	rs4151651	A	G	2.79167	0.34677	8.24682e-16	0.115916	0.0651681	0.0752853
Ankylosing spondylitis	Dementia in Alzheimer disease	rs693196	T	C	0.578329	0.121333	1.87507e-06	0.00439682	0.0248603	0.859617
Ankylosing spondylitis	Dementia in Alzheimer disease	rs78091800	C	G	3.00891	0.539843	2.49417e-08	0.117214	0.0613753	0.0561604
Ankylosing spondylitis	Dementia in Alzheimer disease	rs80221354	T	C	2.00776	0.37107	6.27705e-08	-0.150966	0.173638	0.384614
Ankylosing spondylitis	Dementia in Alzheimer disease	rs9262619	C	G	0.590728	0.122085	1.30711e-06	0.0374218	0.024446	0.125821
Ankylosing spondylitis	Dementia	rs118052498	G	A	2.04682	0.445804	4.40508e-06	0.0315383	0.0682729	0.644122
Ankylosing spondylitis	Dementia	rs139932310	T	C	3.34779	0.724665	3.84156e-06	-0.0222023	0.0708933	0.754144
Ankylosing spondylitis	Dementia	rs148257298	T	C	2.81839	0.598562	2.49427e-06	0.0329951	0.144265	0.819094
Ankylosing spondylitis	Dementia	rs285761	G	A	0.526153	0.114138	4.03038e-06	0.0066305	0.0156398	0.671602
Ankylosing spondylitis	Dementia	rs34361513	A	G	1.54753	0.337103	4.41813e-06	0.029945	0.0386312	0.43825
Ankylosing spondylitis	Dementia	rs4151651	A	G	2.79167	0.34677	8.24682e-16	0.056784	0.0385964	0.14123
Ankylosing spondylitis	Dementia	rs693196	T	C	0.578329	0.121333	1.87507e-06	0.00987512	0.0148822	0.506977
Ankylosing spondylitis	Dementia	rs78091800	C	G	3.00891	0.539843	2.49417e-08	0.0519868	0.0368197	0.157971
Ankylosing spondylitis	Dementia	rs80221354	T	C	2.00776	0.37107	6.27705e-08	-0.0189786	0.0995425	0.848794
Ankylosing spondylitis	Dementia	rs9262619	C	G	0.590728	0.122085	1.30711e-06	-0.000952529	0.0146184	0.948047
Ankylosing spondylitis	Unspecified dementia	rs118052498	G	A	2.04682	0.445804	4.40508e-06	0.0713821	0.127053	0.574233
Ankylosing spondylitis	Unspecified dementia	rs139932310	T	C	3.34779	0.724665	3.84156e-06	-0.0180952	0.135823	0.894014
Ankylosing spondylitis	Unspecified dementia	rs148257298	T	C	2.81839	0.598562	2.49427e-06	-0.0168159	0.279724	0.952063
Ankylosing spondylitis	Unspecified dementia	rs285761	G	A	0.526153	0.114138	4.03038e-06	-0.00381609	0.029832	0.898213
Ankylosing spondylitis	Unspecified dementia	rs34361513	A	G	1.54753	0.337103	4.41813e-06	-0.135434	0.0744054	0.0687258
Ankylosing spondylitis	Unspecified dementia	rs4151651	A	G	2.79167	0.34677	8.24682e-16	0.0566858	0.0730104	0.437508
Ankylosing spondylitis	Unspecified dementia	rs693196	T	C	0.578329	0.121333	1.87507e-06	0.0229133	0.0285724	0.422589
Ankylosing spondylitis	Unspecified dementia	rs78091800	C	G	3.00891	0.539843	2.49417e-08	0.0501116	0.0714625	0.48316
Ankylosing spondylitis	Unspecified dementia	rs80221354	T	C	2.00776	0.37107	6.27705e-08	-0.121782	0.189316	0.520047
Ankylosing spondylitis	Unspecified dementia	rs9262619	C	G	0.590728	0.122085	1.30711e-06	0.0296324	0.0281223	0.292021
Ankylosing spondylitis	Vascular dementia	rs118052498	G	A	2.04682	0.445804	4.40508e-06	0.0623681	0.160697	0.697935
Ankylosing spondylitis	Vascular dementia	rs139932310	T	C	3.34779	0.724665	3.84156e-06	-0.280799	0.167173	0.0930165
Ankylosing spondylitis	Vascular dementia	rs148257298	T	C	2.81839	0.598562	2.49427e-06	-0.0372199	0.340809	0.913036
Ankylosing spondylitis	Vascular dementia	rs285761	G	A	0.526153	0.114138	4.03038e-06	0.0015406	0.0369279	0.966722
Ankylosing spondylitis	Vascular dementia	rs34361513	A	G	1.54753	0.337103	4.41813e-06	-0.0122758	0.0920916	0.893956
Ankylosing spondylitis	Vascular dementia	rs4151651	A	G	2.79167	0.34677	8.24682e-16	0.0422294	0.0916177	0.644849
Ankylosing spondylitis	Vascular dementia	rs693196	T	C	0.578329	0.121333	1.87507e-06	0.0214573	0.0353021	0.543307
Ankylosing spondylitis	Vascular dementia	rs78091800	C	G	3.00891	0.539843	2.49417e-08	-0.0332867	0.087561	0.70383
Ankylosing spondylitis	Vascular dementia	rs80221354	T	C	2.00776	0.37107	6.27705e-08	0.185461	0.233002	0.426053
Ankylosing spondylitis	Vascular dementia	rs9262619	C	G	0.590728	0.122085	1.30711e-06	0.023667	0.034743	0.495743
Ankylosing spondylitis	Frontotemporal dementia, wide, incl. Pick's disease	rs118052498	G	A	2.04682	0.445804	4.40508e-06	-0.587676	0.673324	0.382773
Ankylosing spondylitis	Frontotemporal dementia, wide, incl. Pick's disease	rs139932310	T	C	3.34779	0.724665	3.84156e-06	0.181312	0.69858	0.795216
Ankylosing spondylitis	Frontotemporal dementia, wide, incl. Pick's disease	rs148257298	T	C	2.81839	0.598562	2.49427e-06	-1.02627	1.4438	0.477202
Ankylosing spondylitis	Frontotemporal dementia, wide, incl. Pick's disease	rs285761	G	A	0.526153	0.114138	4.03038e-06	-0.00342458	0.150693	0.981869
Ankylosing spondylitis	Frontotemporal dementia, wide, incl. Pick's disease	rs34361513	A	G	1.54753	0.337103	4.41813e-06	0.578694	0.369294	0.117109
Ankylosing spondylitis	Frontotemporal dementia, wide, incl. Pick's disease	rs4151651	A	G	2.79167	0.34677	8.24682e-16	-0.169113	0.38006	0.656346
Ankylosing spondylitis	Frontotemporal dementia, wide, incl. Pick's disease	rs693196	T	C	0.578329	0.121333	1.87507e-06	0.0511339	0.141401	0.717632
Ankylosing spondylitis	Frontotemporal dementia, wide, incl. Pick's disease	rs78091800	C	G	3.00891	0.539843	2.49417e-08	0.407177	0.346199	0.23954
Ankylosing spondylitis	Frontotemporal dementia, wide, incl. Pick's disease	rs80221354	T	C	2.00776	0.37107	6.27705e-08	1.10132	0.990683	0.266275
Ankylosing spondylitis	Frontotemporal dementia, wide, incl. Pick's disease	rs9262619	C	G	0.590728	0.122085	1.30711e-06	-0.134159	0.140036	0.338047
Juvenile idiopathic arthritis	Dementia with Lewy bodies	rs11065979	T	C	0.224616	0.0388217	7.21506e-09	-0.00764817	0.0377269	0.839355
Juvenile idiopathic arthritis	Dementia with Lewy bodies	rs9272349	A	G	0.588067	0.0607946	3.92645e-22	0.00566099	0.0513436	0.9122
Juvenile idiopathic arthritis	Dementia with Lewy bodies	rs9461245	A	G	0.290947	0.0523447	2.72439e-08	-0.0501497	0.0578964	0.386385
Juvenile idiopathic arthritis	Dementia in Alzheimer disease	rs11065979	T	C	0.224616	0.0388217	7.21506e-09	0.00114081	0.0233756	0.961076
Juvenile idiopathic arthritis	Dementia in Alzheimer disease	rs115681000	G	A	0.812856	0.0559778	8.91251e-48	-0.00793433	0.0418671	0.849691
Juvenile idiopathic arthritis	Dementia in Alzheimer disease	rs2734976	T	C	0.23213	0.0387647	2.12183e-09	0.0242478	0.0228801	0.289246
Juvenile idiopathic arthritis	Dementia in Alzheimer disease	rs6679677	A	C	0.286281	0.0503771	1.32538e-08	0.00732483	0.0327117	0.822819
Juvenile idiopathic arthritis	Dementia in Alzheimer disease	rs8048448	C	T	0.244723	0.042337	7.45453e-09	0.020079	0.0258824	0.43788
Juvenile idiopathic arthritis	Dementia in Alzheimer disease	rs9272349	A	G	0.588067	0.0607946	3.92645e-22	-0.00709172	0.0318364	0.823726
Juvenile idiopathic arthritis	Dementia in Alzheimer disease	rs9461245	A	G	0.290947	0.0523447	2.72439e-08	-0.00201169	0.0331067	0.951547
Juvenile idiopathic arthritis	Dementia	rs11065979	T	C	0.224616	0.0388217	7.21506e-09	0.0113114	0.0140061	0.419318
Juvenile idiopathic arthritis	Dementia	rs115681000	G	A	0.812856	0.0559778	8.91251e-48	0.0191931	0.024853	0.439958
Juvenile idiopathic arthritis	Dementia	rs2734976	T	C	0.23213	0.0387647	2.12183e-09	0.0120962	0.0137077	0.377541
Juvenile idiopathic arthritis	Dementia	rs6679677	A	C	0.286281	0.0503771	1.32538e-08	0.0166749	0.0195067	0.392645
Juvenile idiopathic arthritis	Dementia	rs8048448	C	T	0.244723	0.042337	7.45453e-09	-0.022115	0.0155336	0.154536
Juvenile idiopathic arthritis	Dementia	rs9272349	A	G	0.588067	0.0607946	3.92645e-22	-0.0360293	0.0191287	0.0596307
Juvenile idiopathic arthritis	Dementia	rs9461245	A	G	0.290947	0.0523447	2.72439e-08	0.0035396	0.0198532	0.858497
Juvenile idiopathic arthritis	Unspecified dementia	rs11065979	T	C	0.224616	0.0388217	7.21506e-09	0.0168183	0.0268764	0.531468
Juvenile idiopathic arthritis	Unspecified dementia	rs115681000	G	A	0.812856	0.0559778	8.91251e-48	0.0776243	0.047427	0.101691
Juvenile idiopathic arthritis	Unspecified dementia	rs2734976	T	C	0.23213	0.0387647	2.12183e-09	0.0405585	0.026289	0.122881
Juvenile idiopathic arthritis	Unspecified dementia	rs6679677	A	C	0.286281	0.0503771	1.32538e-08	-0.0433405	0.0376607	0.249809
Juvenile idiopathic arthritis	Unspecified dementia	rs8048448	C	T	0.244723	0.042337	7.45453e-09	-0.070585	0.0295788	0.0170169
Juvenile idiopathic arthritis	Unspecified dementia	rs9272349	A	G	0.588067	0.0607946	3.92645e-22	-0.00780172	0.0365406	0.830931
Juvenile idiopathic arthritis	Unspecified dementia	rs9461245	A	G	0.290947	0.0523447	2.72439e-08	0.0458432	0.0379751	0.227359
Juvenile idiopathic arthritis	Vascular dementia	rs11065979	T	C	0.224616	0.0388217	7.21506e-09	-0.00839001	0.0332816	0.80097
Juvenile idiopathic arthritis	Vascular dementia	rs115681000	G	A	0.812856	0.0559778	8.91251e-48	0.0981506	0.0593951	0.0984328
Juvenile idiopathic arthritis	Vascular dementia	rs2734976	T	C	0.23213	0.0387647	2.12183e-09	-0.00371149	0.0325141	0.909119
Juvenile idiopathic arthritis	Vascular dementia	rs6679677	A	C	0.286281	0.0503771	1.32538e-08	-0.0289996	0.046447	0.532393
Juvenile idiopathic arthritis	Vascular dementia	rs8048448	C	T	0.244723	0.042337	7.45453e-09	0.0181226	0.0365406	0.619923
Juvenile idiopathic arthritis	Vascular dementia	rs9272349	A	G	0.588067	0.0607946	3.92645e-22	-0.0219258	0.0454618	0.629599
Juvenile idiopathic arthritis	Vascular dementia	rs9461245	A	G	0.290947	0.0523447	2.72439e-08	-0.0200227	0.047337	0.672308
Juvenile idiopathic arthritis	Frontotemporal dementia, wide, incl. Pick's disease	rs11065979	T	C	0.224616	0.0388217	7.21506e-09	0.0497777	0.133455	0.709155
Juvenile idiopathic arthritis	Frontotemporal dementia, wide, incl. Pick's disease	rs115681000	G	A	0.812856	0.0559778	8.91251e-48	-0.569786	0.237862	0.0166005
Juvenile idiopathic arthritis	Frontotemporal dementia, wide, incl. Pick's disease	rs2734976	T	C	0.23213	0.0387647	2.12183e-09	-0.138608	0.131126	0.290485
Juvenile idiopathic arthritis	Frontotemporal dementia, wide, incl. Pick's disease	rs6679677	A	C	0.286281	0.0503771	1.32538e-08	-0.253264	0.184844	0.170639
Juvenile idiopathic arthritis	Frontotemporal dementia, wide, incl. Pick's disease	rs8048448	C	T	0.244723	0.042337	7.45453e-09	0.164757	0.150125	0.272438
Juvenile idiopathic arthritis	Frontotemporal dementia, wide, incl. Pick's disease	rs9272349	A	G	0.588067	0.0607946	3.92645e-22	-0.221121	0.184136	0.229808
Juvenile idiopathic arthritis	Frontotemporal dementia, wide, incl. Pick's disease	rs9461245	A	G	0.290947	0.0523447	2.72439e-08	-0.152519	0.189339	0.420511
Gout	Dementia with Lewy bodies	rs13287980	A	G	0.24	0.047	9.7059e-07	0.0795503	0.0541121	0.141535
Gout	Dementia with Lewy bodies	rs1481012	A	G	-0.55	0.046	2.04613e-32	0.0119279	0.0605561	0.843848
Gout	Dementia with Lewy bodies	rs17074636	T	G	-0.71	0.14	6.8246e-07	0.112578	0.152943	0.461683
Gout	Dementia with Lewy bodies	rs4475146	A	C	-0.47	0.044	4.11039e-26	-0.0287617	0.0441569	0.51482
Gout	Dementia with Lewy bodies	rs8087353	T	C	-0.2	0.043	4.98887e-06	-0.0363373	0.0470694	0.440121
Gout	Dementia with Lewy bodies	rs9311138	A	G	0.23	0.047	1.01099e-06	0.0266809	0.0593105	0.652828
Gout	Dementia in Alzheimer disease	rs13287980	A	G	0.24	0.047	9.7059e-07	-0.032871	0.0333063	0.323677
Gout	Dementia in Alzheimer disease	rs1481012	A	G	-0.55	0.046	2.04613e-32	0.0348164	0.0435192	0.423698
Gout	Dementia in Alzheimer disease	rs17074636	T	G	-0.71	0.14	6.8246e-07	-0.0699151	0.175817	0.690882
Gout	Dementia in Alzheimer disease	rs4475146	A	C	-0.47	0.044	4.11039e-26	0.00802284	0.0293621	0.78467
Gout	Dementia in Alzheimer disease	rs8085724	A	G	-1.8	0.36	1.04098e-06	-0.0944027	0.14733	0.52168
Gout	Dementia in Alzheimer disease	rs8087353	T	C	-0.2	0.043	4.98887e-06	-0.0465584	0.0285472	0.102906
Gout	Dementia in Alzheimer disease	rs9311138	A	G	0.23	0.047	1.01099e-06	0.03057	0.031924	0.338272
Gout	Dementia	rs13287980	A	G	0.24	0.047	9.7059e-07	-0.0143944	0.0200221	0.472186
Gout	Dementia	rs1481012	A	G	-0.55	0.046	2.04613e-32	0.0104882	0.026096	0.687751
Gout	Dementia	rs17074636	T	G	-0.71	0.14	6.8246e-07	0.17058	0.104455	0.10246
Gout	Dementia	rs4475146	A	C	-0.47	0.044	4.11039e-26	0.0283006	0.0175173	0.106186
Gout	Dementia	rs8085724	A	G	-1.8	0.36	1.04098e-06	0.0770905	0.0871114	0.376176
Gout	Dementia	rs8087353	T	C	-0.2	0.043	4.98887e-06	0.0278514	0.0170831	0.103028
Gout	Dementia	rs9311138	A	G	0.23	0.047	1.01099e-06	-0.00412278	0.0190969	0.829076
Gout	Unspecified dementia	rs13287980	A	G	0.24	0.047	9.7059e-07	0.032644	0.0382676	0.393633
Gout	Unspecified dementia	rs1481012	A	G	-0.55	0.046	2.04613e-32	-0.0620564	0.0497318	0.212096
Gout	Unspecified dementia	rs17074636	T	G	-0.71	0.14	6.8246e-07	0.232314	0.19041	0.222437
Gout	Unspecified dementia	rs4475146	A	C	-0.47	0.044	4.11039e-26	0.0363922	0.0336293	0.279183
Gout	Unspecified dementia	rs8085724	A	G	-1.8	0.36	1.04098e-06	0.199922	0.152181	0.188943
Gout	Unspecified dementia	rs8087353	T	C	-0.2	0.043	4.98887e-06	0.00191417	0.0328615	0.95355
Gout	Unspecified dementia	rs9311138	A	G	0.23	0.047	1.01099e-06	-0.0416679	0.0368776	0.258519
Gout	Vascular dementia	rs13287980	A	G	0.24	0.047	9.7059e-07	-0.111996	0.0474901	0.0183586
Gout	Vascular dementia	rs1481012	A	G	-0.55	0.046	2.04613e-32	-0.0337224	0.061119	0.58112
Gout	Vascular dementia	rs17074636	T	G	-0.71	0.14	6.8246e-07	-0.245674	0.237655	0.301257
Gout	Vascular dementia	rs4475146	A	C	-0.47	0.044	4.11039e-26	0.00670524	0.0418393	0.872675
Gout	Vascular dementia	rs8085724	A	G	-1.8	0.36	1.04098e-06	-0.0207175	0.196722	0.916127
Gout	Vascular dementia	rs8087353	T	C	-0.2	0.043	4.98887e-06	0.0415353	0.0405012	0.305112
Gout	Vascular dementia	rs9311138	A	G	0.23	0.047	1.01099e-06	-0.000684327	0.0452468	0.987933
Gout	Frontotemporal dementia, wide, incl. Pick's disease	rs13287980	A	G	0.24	0.047	9.7059e-07	-0.117317	0.190609	0.538235
Gout	Frontotemporal dementia, wide, incl. Pick's disease	rs1481012	A	G	-0.55	0.046	2.04613e-32	-0.158779	0.256878	0.536503
Gout	Frontotemporal dementia, wide, incl. Pick's disease	rs17074636	T	G	-0.71	0.14	6.8246e-07	1.01822	1.00892	0.31287
Gout	Frontotemporal dementia, wide, incl. Pick's disease	rs4475146	A	C	-0.47	0.044	4.11039e-26	0.0140328	0.168048	0.93345
Gout	Frontotemporal dementia, wide, incl. Pick's disease	rs8085724	A	G	-1.8	0.36	1.04098e-06	0.557884	0.938644	0.552277
Gout	Frontotemporal dementia, wide, incl. Pick's disease	rs8087353	T	C	-0.2	0.043	4.98887e-06	0.195234	0.164382	0.234958
Gout	Frontotemporal dementia, wide, incl. Pick's disease	rs9311138	A	G	0.23	0.047	1.01099e-06	-0.0453539	0.182419	0.803651
Osteoporosis	Dementia with Lewy bodies	rs113866131	C	G	0.854514	0.175762	1.16334e-06	-0.122138	0.132858	0.35793
Osteoporosis	Dementia with Lewy bodies	rs1991856	T	G	-0.293768	0.0626431	2.73811e-06	0.0313921	0.0496563	0.527215
Osteoporosis	Dementia with Lewy bodies	rs205414	T	C	0.34503	0.0693232	6.45387e-07	-0.0790346	0.0540334	0.143548
Osteoporosis	Dementia with Lewy bodies	rs2505084	A	G	-0.219067	0.0458443	1.76614e-06	0.0386244	0.037202	0.299217
Osteoporosis	Dementia with Lewy bodies	rs36071623	A	G	0.542514	0.118366	4.57548e-06	0.0429158	0.0968444	0.657671
Osteoporosis	Dementia with Lewy bodies	rs4149586	A	C	0.876019	0.186262	2.56185e-06	0.0996915	0.136022	0.463623
Osteoporosis	Dementia with Lewy bodies	rs79056671	A	G	0.898699	0.195346	4.21362e-06	-0.139526	0.135575	0.303411
Osteoporosis	Dementia with Lewy bodies	rs80092501	G	T	0.564111	0.116903	1.39693e-06	-0.0629728	0.0975417	0.51854
Osteoporosis	Dementia in Alzheimer disease	rs113866131	C	G	0.854514	0.175762	1.16334e-06	-0.0695422	0.0740034	0.347363
Osteoporosis	Dementia in Alzheimer disease	rs1991856	T	G	-0.293768	0.0626431	2.73811e-06	-0.0174145	0.0294168	0.553855
Osteoporosis	Dementia in Alzheimer disease	rs205414	T	C	0.34503	0.0693232	6.45387e-07	0.0113299	0.0357971	0.751619
Osteoporosis	Dementia in Alzheimer disease	rs2505084	A	G	-0.219067	0.0458443	1.76614e-06	-0.0104417	0.0228831	0.648169
Osteoporosis	Dementia in Alzheimer disease	rs36071623	A	G	0.542514	0.118366	4.57548e-06	-0.0162574	0.0517374	0.753347
Osteoporosis	Dementia in Alzheimer disease	rs4149586	A	C	0.876019	0.186262	2.56185e-06	0.307408	0.13202	0.0198857
Osteoporosis	Dementia in Alzheimer disease	rs79056671	A	G	0.898699	0.195346	4.21362e-06	-0.0522512	0.105344	0.619891
Osteoporosis	Dementia	rs113866131	C	G	0.854514	0.175762	1.16334e-06	-0.0527128	0.0444175	0.235323
Osteoporosis	Dementia	rs1991856	T	G	-0.293768	0.0626431	2.73811e-06	-0.00346776	0.0176471	0.844214
Osteoporosis	Dementia	rs205414	T	C	0.34503	0.0693232	6.45387e-07	0.00850775	0.0214186	0.69121
Osteoporosis	Dementia	rs2505084	A	G	-0.219067	0.0458443	1.76614e-06	0.00148599	0.0136801	0.913501
Osteoporosis	Dementia	rs36071623	A	G	0.542514	0.118366	4.57548e-06	-0.00149604	0.0309452	0.961442
Osteoporosis	Dementia	rs4149586	A	C	0.876019	0.186262	2.56185e-06	0.0650599	0.0804276	0.418558
Osteoporosis	Dementia	rs79056671	A	G	0.898699	0.195346	4.21362e-06	-0.0776086	0.0641796	0.22657
Osteoporosis	Unspecified dementia	rs113866131	C	G	0.854514	0.175762	1.16334e-06	-0.0620791	0.0854738	0.467659
Osteoporosis	Unspecified dementia	rs1991856	T	G	-0.293768	0.0626431	2.73811e-06	-0.0441456	0.0338592	0.192303
Osteoporosis	Unspecified dementia	rs205414	T	C	0.34503	0.0693232	6.45387e-07	0.0085827	0.040918	0.83386
Osteoporosis	Unspecified dementia	rs2505084	A	G	-0.219067	0.0458443	1.76614e-06	-0.0218007	0.0261773	0.404952
Osteoporosis	Unspecified dementia	rs36071623	A	G	0.542514	0.118366	4.57548e-06	-0.0896486	0.0601401	0.13605
Osteoporosis	Unspecified dementia	rs4149586	A	C	0.876019	0.186262	2.56185e-06	0.0125075	0.15301	0.934851
Osteoporosis	Unspecified dementia	rs79056671	A	G	0.898699	0.195346	4.21362e-06	-0.115932	0.120648	0.336598
Osteoporosis	Vascular dementia	rs113866131	C	G	0.854514	0.175762	1.16334e-06	6.86566e-05	0.104481	0.999476
Osteoporosis	Vascular dementia	rs1991856	T	G	-0.293768	0.0626431	2.73811e-06	-0.0146406	0.0417838	0.726046
Osteoporosis	Vascular dementia	rs205414	T	C	0.34503	0.0693232	6.45387e-07	-0.0250936	0.0507185	0.620768
Osteoporosis	Vascular dementia	rs2505084	A	G	-0.219067	0.0458443	1.76614e-06	0.0111689	0.0323515	0.729916
Osteoporosis	Vascular dementia	rs36071623	A	G	0.542514	0.118366	4.57548e-06	-0.00254114	0.073732	0.972507
Osteoporosis	Vascular dementia	rs4149586	A	C	0.876019	0.186262	2.56185e-06	-0.0832765	0.190806	0.662512
Osteoporosis	Vascular dementia	rs79056671	A	G	0.898699	0.195346	4.21362e-06	-0.0967891	0.149642	0.517758
Osteoporosis	Frontotemporal dementia, wide, incl. Pick's disease	rs113866131	C	G	0.854514	0.175762	1.16334e-06	-0.55069	0.403343	0.172154
Osteoporosis	Frontotemporal dementia, wide, incl. Pick's disease	rs1991856	T	G	-0.293768	0.0626431	2.73811e-06	-0.197758	0.168291	0.239956
Osteoporosis	Frontotemporal dementia, wide, incl. Pick's disease	rs205414	T	C	0.34503	0.0693232	6.45387e-07	0.0134287	0.205471	0.947891
Osteoporosis	Frontotemporal dementia, wide, incl. Pick's disease	rs2505084	A	G	-0.219067	0.0458443	1.76614e-06	-0.174672	0.13076	0.181608
Osteoporosis	Frontotemporal dementia, wide, incl. Pick's disease	rs36071623	A	G	0.542514	0.118366	4.57548e-06	-0.336393	0.286649	0.24058
Osteoporosis	Frontotemporal dementia, wide, incl. Pick's disease	rs4149586	A	C	0.876019	0.186262	2.56185e-06	-0.404748	0.786422	0.606782
Osteoporosis	Frontotemporal dementia, wide, incl. Pick's disease	rs79056671	A	G	0.898699	0.195346	4.21362e-06	-0.236347	0.625658	0.70561
Osteoporosis with pathological fracture	Dementia with Lewy bodies	rs11800051	C	T	0.0380133	0.038013	6.4e-09	-0.0669959	0.0370581	0.0706285
Osteoporosis with pathological fracture	Dementia with Lewy bodies	rs2908007	G	A	0.100019	0.100019	2.1e-50	-0.0390122	0.0374075	0.296991
Osteoporosis with pathological fracture	Dementia with Lewy bodies	rs3020332	T	C	0.0412561	0.041256	4e-10	0.0607752	0.0373941	0.104126
Osteoporosis with pathological fracture	Dementia with Lewy bodies	rs4793022	C	G	0.0524957	0.052496	2.3e-14	-0.0445909	0.0377207	0.237142
Osteoporosis with pathological fracture	Dementia with Lewy bodies	rs4842509	T	C	0.0366482	0.036648	2.9e-08	0.0381721	0.0377709	0.312188
Osteoporosis with pathological fracture	Dementia with Lewy bodies	rs6963134	G	A	0.0522565	0.052257	2.1e-14	-0.0441221	0.038782	0.255262
Osteoporosis with pathological fracture	Dementia with Lewy bodies	rs7741021	C	A	0.0681389	0.068139	2.8e-25	0.0381432	0.0368708	0.300958
Osteoporosis with pathological fracture	Dementia in Alzheimer disease	rs11800051	C	T	0.0380133	0.038013	6.4e-09	0.0222427	0.0231996	0.337684
Osteoporosis with pathological fracture	Dementia in Alzheimer disease	rs2908007	G	A	0.100019	0.100019	2.1e-50	0.00570553	0.0238389	0.810845
Osteoporosis with pathological fracture	Dementia in Alzheimer disease	rs3020332	T	C	0.0412561	0.041256	4e-10	0.0219591	0.0227199	0.333787
Osteoporosis with pathological fracture	Dementia in Alzheimer disease	rs4842509	T	C	0.0366482	0.036648	2.9e-08	-0.011972	0.0243586	0.623082
Osteoporosis with pathological fracture	Dementia in Alzheimer disease	rs6963134	G	A	0.0522565	0.052257	2.1e-14	-0.00475695	0.0259562	0.854588
Osteoporosis with pathological fracture	Dementia in Alzheimer disease	rs7741021	C	A	0.0681389	0.068139	2.8e-25	-0.0122695	0.0228919	0.591977
Osteoporosis with pathological fracture	Dementia	rs11800051	C	T	0.0380133	0.038013	6.4e-09	0.032834	0.0138751	0.0179618
Osteoporosis with pathological fracture	Dementia	rs2908007	G	A	0.100019	0.100019	2.1e-50	-0.00438219	0.0142545	0.75852
Osteoporosis with pathological fracture	Dementia	rs3020332	T	C	0.0412561	0.041256	4e-10	0.0192267	0.0136087	0.157707
Osteoporosis with pathological fracture	Dementia	rs4842509	T	C	0.0366482	0.036648	2.9e-08	0.000855646	0.0145672	0.953161
Osteoporosis with pathological fracture	Dementia	rs6963134	G	A	0.0522565	0.052257	2.1e-14	-0.0141015	0.0154766	0.362216
Osteoporosis with pathological fracture	Dementia	rs7741021	C	A	0.0681389	0.068139	2.8e-25	-0.017666	0.0136884	0.196848
Osteoporosis with pathological fracture	Unspecified dementia	rs11800051	C	T	0.0380133	0.038013	6.4e-09	0.0491236	0.0265753	0.0645342
Osteoporosis with pathological fracture	Unspecified dementia	rs2908007	G	A	0.100019	0.100019	2.1e-50	-0.000237938	0.0272709	0.993039
Osteoporosis with pathological fracture	Unspecified dementia	rs3020332	T	C	0.0412561	0.041256	4e-10	0.0376984	0.0261021	0.148663
Osteoporosis with pathological fracture	Unspecified dementia	rs4842509	T	C	0.0366482	0.036648	2.9e-08	0.0159207	0.0279203	0.568528
Osteoporosis with pathological fracture	Unspecified dementia	rs6963134	G	A	0.0522565	0.052257	2.1e-14	-0.0433587	0.0295455	0.142234
Osteoporosis with pathological fracture	Unspecified dementia	rs7741021	C	A	0.0681389	0.068139	2.8e-25	-0.0114787	0.0262323	0.661692
Osteoporosis with pathological fracture	Vascular dementia	rs11800051	C	T	0.0380133	0.038013	6.4e-09	0.014284	0.0328008	0.663214
Osteoporosis with pathological fracture	Vascular dementia	rs2908007	G	A	0.100019	0.100019	2.1e-50	0.00548018	0.0336963	0.870806
Osteoporosis with pathological fracture	Vascular dementia	rs3020332	T	C	0.0412561	0.041256	4e-10	-0.0437963	0.0322471	0.174417
Osteoporosis with pathological fracture	Vascular dementia	rs4842509	T	C	0.0366482	0.036648	2.9e-08	-0.0256906	0.0346776	0.45879
Osteoporosis with pathological fracture	Vascular dementia	rs6963134	G	A	0.0522565	0.052257	2.1e-14	0.001519	0.0366009	0.966896
Osteoporosis with pathological fracture	Vascular dementia	rs7741021	C	A	0.0681389	0.068139	2.8e-25	-0.00263083	0.0324562	0.935396
Osteoporosis with pathological fracture	Frontotemporal dementia, wide, incl. Pick's disease	rs11800051	C	T	0.0380133	0.038013	6.4e-09	-0.318263	0.125425	0.0111655
Osteoporosis with pathological fracture	Frontotemporal dementia, wide, incl. Pick's disease	rs2908007	G	A	0.100019	0.100019	2.1e-50	-0.130787	0.137252	0.340643
Osteoporosis with pathological fracture	Frontotemporal dementia, wide, incl. Pick's disease	rs3020332	T	C	0.0412561	0.041256	4e-10	0.000321193	0.130679	0.998039
Osteoporosis with pathological fracture	Frontotemporal dementia, wide, incl. Pick's disease	rs4842509	T	C	0.0366482	0.036648	2.9e-08	0.128261	0.139346	0.357337
Osteoporosis with pathological fracture	Frontotemporal dementia, wide, incl. Pick's disease	rs6963134	G	A	0.0522565	0.052257	2.1e-14	-0.240367	0.14946	0.107785
Osteoporosis with pathological fracture	Frontotemporal dementia, wide, incl. Pick's disease	rs7741021	C	A	0.0681389	0.068139	2.8e-25	-0.0272939	0.131075	0.835049
Osteomalacia	Dementia with Lewy bodies	rs142742861	T	C	3.93489	0.774516	3.76528e-07	0.0162375	0.144629	0.910583
Osteomalacia	Dementia with Lewy bodies	rs2000613	T	G	1.79381	0.379822	2.32666e-06	-0.0237949	0.0943222	0.800832
Osteomalacia	Dementia with Lewy bodies	rs2893652	A	G	0.851682	0.175989	1.3022e-06	0.0171521	0.044178	0.697879
Osteomalacia	Dementia with Lewy bodies	rs4074852	A	G	4.23483	0.869445	1.11188e-06	-0.143089	0.161042	0.374259
Osteomalacia	Dementia with Lewy bodies	rs79169887	C	T	1.46996	0.319403	4.1801e-06	0.00656838	0.0765211	0.931573
Osteomalacia	Dementia in Alzheimer disease	rs142742861	T	C	3.93489	0.774516	3.76528e-07	0.0530447	0.130709	0.684873
Osteomalacia	Dementia in Alzheimer disease	rs2000613	T	G	1.79381	0.379822	2.32666e-06	-0.0296336	0.0479734	0.536767
Osteomalacia	Dementia in Alzheimer disease	rs2893652	A	G	0.851682	0.175989	1.3022e-06	0.0019127	0.0309904	0.950786
Osteomalacia	Dementia in Alzheimer disease	rs4074852	A	G	4.23483	0.869445	1.11188e-06	0.125591	0.108022	0.244971
Osteomalacia	Dementia in Alzheimer disease	rs79169887	C	T	1.46996	0.319403	4.1801e-06	0.100687	0.0432749	0.019982
Osteomalacia	Dementia	rs142742861	T	C	3.93489	0.774516	3.76528e-07	-0.0395933	0.0795828	0.618829
Osteomalacia	Dementia	rs2000613	T	G	1.79381	0.379822	2.32666e-06	-0.0349283	0.0288005	0.22522
Osteomalacia	Dementia	rs2893652	A	G	0.851682	0.175989	1.3022e-06	-0.00109588	0.018561	0.952919
Osteomalacia	Dementia	rs4074852	A	G	4.23483	0.869445	1.11188e-06	0.0477161	0.0643982	0.458721
Osteomalacia	Dementia	rs79169887	C	T	1.46996	0.319403	4.1801e-06	0.0264269	0.0260017	0.309462
Osteomalacia	Unspecified dementia	rs142742861	T	C	3.93489	0.774516	3.76528e-07	0.0327938	0.151018	0.82809
Osteomalacia	Unspecified dementia	rs2000613	T	G	1.79381	0.379822	2.32666e-06	-0.0515218	0.0554787	0.353056
Osteomalacia	Unspecified dementia	rs2893652	A	G	0.851682	0.175989	1.3022e-06	-0.0508233	0.0354863	0.152088
Osteomalacia	Unspecified dementia	rs4074852	A	G	4.23483	0.869445	1.11188e-06	0.108417	0.12253	0.376252
Osteomalacia	Unspecified dementia	rs79169887	C	T	1.46996	0.319403	4.1801e-06	0.0393971	0.0494699	0.425808
Osteomalacia	Vascular dementia	rs142742861	T	C	3.93489	0.774516	3.76528e-07	-0.350491	0.188532	0.0630188
Osteomalacia	Vascular dementia	rs2000613	T	G	1.79381	0.379822	2.32666e-06	-0.0863429	0.0686746	0.208654
Osteomalacia	Vascular dementia	rs2893652	A	G	0.851682	0.175989	1.3022e-06	-0.0461992	0.0438653	0.292247
Osteomalacia	Vascular dementia	rs4074852	A	G	4.23483	0.869445	1.11188e-06	-0.132735	0.150688	0.378396
Osteomalacia	Vascular dementia	rs79169887	C	T	1.46996	0.319403	4.1801e-06	0.123264	0.0616994	0.0457372
Osteomalacia	Frontotemporal dementia, wide, incl. Pick's disease	rs142742861	T	C	3.93489	0.774516	3.76528e-07	-1.04659	0.773628	0.176108
Osteomalacia	Frontotemporal dementia, wide, incl. Pick's disease	rs2000613	T	G	1.79381	0.379822	2.32666e-06	0.0803693	0.27055	0.766422
Osteomalacia	Frontotemporal dementia, wide, incl. Pick's disease	rs2893652	A	G	0.851682	0.175989	1.3022e-06	0.0292272	0.179568	0.870704
Osteomalacia	Frontotemporal dementia, wide, incl. Pick's disease	rs4074852	A	G	4.23483	0.869445	1.11188e-06	0.0548157	0.616098	0.929104
Osteomalacia	Frontotemporal dementia, wide, incl. Pick's disease	rs79169887	C	T	1.46996	0.319403	4.1801e-06	-0.282918	0.249143	0.256138
Osteonecrosis	Dementia with Lewy bodies	rs115364578	G	A	0.691926	0.150249	4.12082e-06	0.10941	0.0572012	0.0557738
Osteonecrosis	Dementia with Lewy bodies	rs118001548	A	G	1.38166	0.276782	5.97912e-07	-0.14816	0.0952785	0.119942
Osteonecrosis	Dementia with Lewy bodies	rs149600208	T	C	1.96688	0.41923	2.71024e-06	-0.0118934	0.149998	0.9368
Osteonecrosis	Dementia with Lewy bodies	rs17587029	G	A	1.14106	0.23383	1.06172e-06	0.102791	0.0818211	0.209029
Osteonecrosis	Dementia with Lewy bodies	rs1796260	C	T	-0.527191	0.113779	3.59588e-06	0.00455959	0.0444374	0.918312
Osteonecrosis	Dementia with Lewy bodies	rs61731746	G	T	1.25261	0.248397	4.58826e-07	0.111962	0.0900544	0.213752
Osteonecrosis	Dementia with Lewy bodies	rs7175314	T	C	0.528277	0.112364	2.58267e-06	-0.0123783	0.0452354	0.784363
Osteonecrosis	Dementia with Lewy bodies	rs74885890	T	C	0.882677	0.179792	9.13341e-07	-0.109636	0.0695279	0.114824
Osteonecrosis	Dementia with Lewy bodies	rs79745384	T	C	1.22742	0.26477	3.55587e-06	0.0517192	0.102605	0.614207
Osteonecrosis	Dementia with Lewy bodies	rs9303952	A	G	0.545371	0.118248	3.98626e-06	0.0164539	0.0468817	0.725613
Osteonecrosis	Dementia with Lewy bodies	rs9609779	A	C	0.508725	0.10514	1.30798e-06	-0.0423304	0.0434967	0.330466
Osteonecrosis	Dementia in Alzheimer disease	rs118001548	A	G	1.38166	0.276782	5.97912e-07	-0.0321387	0.0482595	0.505439
Osteonecrosis	Dementia in Alzheimer disease	rs149600208	T	C	1.96688	0.41923	2.71024e-06	0.117408	0.12086	0.331327
Osteonecrosis	Dementia in Alzheimer disease	rs17587029	G	A	1.14106	0.23383	1.06172e-06	0.0174698	0.0572583	0.760286
Osteonecrosis	Dementia in Alzheimer disease	rs1796260	C	T	-0.527191	0.113779	3.59588e-06	0.0630707	0.0270986	0.0199416
Osteonecrosis	Dementia in Alzheimer disease	rs61731746	G	T	1.25261	0.248397	4.58826e-07	0.0132473	0.0737691	0.857484
Osteonecrosis	Dementia in Alzheimer disease	rs7175314	T	C	0.528277	0.112364	2.58267e-06	-0.00807254	0.0365686	0.825287
Osteonecrosis	Dementia in Alzheimer disease	rs74885890	T	C	0.882677	0.179792	9.13341e-07	-0.0926485	0.0515309	0.0721888
Osteonecrosis	Dementia in Alzheimer disease	rs77623237	C	T	0.568381	0.121251	2.76382e-06	0.00179954	0.0326154	0.955999
Osteonecrosis	Dementia in Alzheimer disease	rs79745384	T	C	1.22742	0.26477	3.55587e-06	0.00493602	0.0683788	0.942454
Osteonecrosis	Dementia in Alzheimer disease	rs9303952	A	G	0.545371	0.118248	3.98626e-06	0.0359165	0.0369953	0.331628
Osteonecrosis	Dementia in Alzheimer disease	rs9609779	A	C	0.508725	0.10514	1.30798e-06	0.0139079	0.025648	0.58764
Osteonecrosis	Dementia	rs118001548	A	G	1.38166	0.276782	5.97912e-07	-0.00614665	0.0289085	0.83162
Osteonecrosis	Dementia	rs149600208	T	C	1.96688	0.41923	2.71024e-06	0.0335197	0.070201	0.633019
Osteonecrosis	Dementia	rs17587029	G	A	1.14106	0.23383	1.06172e-06	0.0278892	0.0344409	0.418073
Osteonecrosis	Dementia	rs1796260	C	T	-0.527191	0.113779	3.59588e-06	0.0430732	0.0160762	0.00737751
Osteonecrosis	Dementia	rs61731746	G	T	1.25261	0.248397	4.58826e-07	0.0111551	0.0439006	0.79942
Osteonecrosis	Dementia	rs7175314	T	C	0.528277	0.112364	2.58267e-06	0.00845268	0.021667	0.696448
Osteonecrosis	Dementia	rs74885890	T	C	0.882677	0.179792	9.13341e-07	-0.0532422	0.0308016	0.08389
Osteonecrosis	Dementia	rs77623237	C	T	0.568381	0.121251	2.76382e-06	0.0128904	0.0196472	0.511763
Osteonecrosis	Dementia	rs79745384	T	C	1.22742	0.26477	3.55587e-06	-0.0100138	0.0409461	0.806796
Osteonecrosis	Dementia	rs9303952	A	G	0.545371	0.118248	3.98626e-06	-0.00183734	0.0220541	0.933604
Osteonecrosis	Dementia	rs9609779	A	C	0.508725	0.10514	1.30798e-06	0.00274972	0.015341	0.857749
Osteonecrosis	Unspecified dementia	rs118001548	A	G	1.38166	0.276782	5.97912e-07	-0.0268752	0.0547603	0.623583
Osteonecrosis	Unspecified dementia	rs149600208	T	C	1.96688	0.41923	2.71024e-06	-0.0370155	0.132266	0.779588
Osteonecrosis	Unspecified dementia	rs17587029	G	A	1.14106	0.23383	1.06172e-06	0.11627	0.065895	0.0776515
Osteonecrosis	Unspecified dementia	rs1796260	C	T	-0.527191	0.113779	3.59588e-06	0.085646	0.0305538	0.00506116
Osteonecrosis	Unspecified dementia	rs61731746	G	T	1.25261	0.248397	4.58826e-07	-0.0143717	0.0843046	0.864638
Osteonecrosis	Unspecified dementia	rs7175314	T	C	0.528277	0.112364	2.58267e-06	0.010113	0.0408729	0.804578
Osteonecrosis	Unspecified dementia	rs74885890	T	C	0.882677	0.179792	9.13341e-07	-0.035854	0.0579765	0.536297
Osteonecrosis	Unspecified dementia	rs77623237	C	T	0.568381	0.121251	2.76382e-06	0.0398192	0.0375136	0.288482
Osteonecrosis	Unspecified dementia	rs79745384	T	C	1.22742	0.26477	3.55587e-06	0.0899845	0.077733	0.247023
Osteonecrosis	Unspecified dementia	rs9303952	A	G	0.545371	0.118248	3.98626e-06	-0.00658815	0.0420419	0.875478
Osteonecrosis	Unspecified dementia	rs9609779	A	C	0.508725	0.10514	1.30798e-06	-0.0366513	0.0293852	0.212299
Osteonecrosis	Vascular dementia	rs118001548	A	G	1.38166	0.276782	5.97912e-07	-0.0373066	0.0683753	0.58533
Osteonecrosis	Vascular dementia	rs149600208	T	C	1.96688	0.41923	2.71024e-06	-0.0251133	0.164124	0.878387
Osteonecrosis	Vascular dementia	rs17587029	G	A	1.14106	0.23383	1.06172e-06	0.0283235	0.0818063	0.729174
Osteonecrosis	Vascular dementia	rs1796260	C	T	-0.527191	0.113779	3.59588e-06	-0.056173	0.038278	0.14224
Osteonecrosis	Vascular dementia	rs61731746	G	T	1.25261	0.248397	4.58826e-07	-0.01761	0.104449	0.866112
Osteonecrosis	Vascular dementia	rs7175314	T	C	0.528277	0.112364	2.58267e-06	-0.0326116	0.0507057	0.520124
Osteonecrosis	Vascular dementia	rs74885890	T	C	0.882677	0.179792	9.13341e-07	0.0597748	0.071728	0.404646
Osteonecrosis	Vascular dementia	rs77623237	C	T	0.568381	0.121251	2.76382e-06	-0.0627069	0.0465078	0.177559
Osteonecrosis	Vascular dementia	rs79745384	T	C	1.22742	0.26477	3.55587e-06	0.0895605	0.0965349	0.353536
Osteonecrosis	Vascular dementia	rs9303952	A	G	0.545371	0.118248	3.98626e-06	-0.0696354	0.0520696	0.181107
Osteonecrosis	Vascular dementia	rs9609779	A	C	0.508725	0.10514	1.30798e-06	-0.0246227	0.0362414	0.496878
Osteonecrosis	Frontotemporal dementia, wide, incl. Pick's disease	rs118001548	A	G	1.38166	0.276782	5.97912e-07	0.243285	0.27087	0.369101
Osteonecrosis	Frontotemporal dementia, wide, incl. Pick's disease	rs149600208	T	C	1.96688	0.41923	2.71024e-06	0.427256	0.699058	0.541074
Osteonecrosis	Frontotemporal dementia, wide, incl. Pick's disease	rs17587029	G	A	1.14106	0.23383	1.06172e-06	0.62547	0.337529	0.0638705
Osteonecrosis	Frontotemporal dementia, wide, incl. Pick's disease	rs1796260	C	T	-0.527191	0.113779	3.59588e-06	0.193559	0.155836	0.21421
Osteonecrosis	Frontotemporal dementia, wide, incl. Pick's disease	rs61731746	G	T	1.25261	0.248397	4.58826e-07	-0.136503	0.422019	0.746353
Osteonecrosis	Frontotemporal dementia, wide, incl. Pick's disease	rs7175314	T	C	0.528277	0.112364	2.58267e-06	0.384604	0.214444	0.0728937
Osteonecrosis	Frontotemporal dementia, wide, incl. Pick's disease	rs74885890	T	C	0.882677	0.179792	9.13341e-07	-0.348506	0.298718	0.243343
Osteonecrosis	Frontotemporal dementia, wide, incl. Pick's disease	rs77623237	C	T	0.568381	0.121251	2.76382e-06	0.333858	0.189156	0.0775658
Osteonecrosis	Frontotemporal dementia, wide, incl. Pick's disease	rs79745384	T	C	1.22742	0.26477	3.55587e-06	0.0924805	0.401586	0.817868
Osteonecrosis	Frontotemporal dementia, wide, incl. Pick's disease	rs9303952	A	G	0.545371	0.118248	3.98626e-06	0.512806	0.213179	0.0161495
Osteonecrosis	Frontotemporal dementia, wide, incl. Pick's disease	rs9609779	A	C	0.508725	0.10514	1.30798e-06	-0.0888383	0.146665	0.544698
Osteomyelitis	Dementia with Lewy bodies	rs117366634	A	G	-0.465874	0.0952783	1.01035e-06	-0.0772245	0.182629	0.672405
Osteomyelitis	Dementia with Lewy bodies	rs117726181	C	T	0.148624	0.0325491	4.96798e-06	0.0994652	0.0594268	0.0941868
Osteomyelitis	Dementia with Lewy bodies	rs12600041	G	A	0.115761	0.0249804	3.58525e-06	0.00528293	0.0443129	0.905107
Osteomyelitis	Dementia with Lewy bodies	rs12959355	T	C	0.108071	0.0227243	1.97706e-06	-0.00387952	0.0397758	0.922303
Osteomyelitis	Dementia with Lewy bodies	rs13066540	C	T	0.0977558	0.0213394	4.62732e-06	0.00344406	0.0373101	0.926375
Osteomyelitis	Dementia with Lewy bodies	rs13315366	T	C	0.126375	0.0259479	1.11406e-06	-0.0153147	0.0465319	0.742069
Osteomyelitis	Dementia with Lewy bodies	rs34677828	C	T	-0.292401	0.0635532	4.20707e-06	0.0665085	0.113727	0.558672
Osteomyelitis	Dementia with Lewy bodies	rs35918350	T	C	0.197096	0.0431029	4.81526e-06	0.0824091	0.0733833	0.261419
Osteomyelitis	Dementia with Lewy bodies	rs74405814	T	C	0.359722	0.0774363	3.3943e-06	0.00597213	0.12279	0.961224
Osteomyelitis	Dementia in Alzheimer disease	rs117366634	A	G	-0.465874	0.0952783	1.01035e-06	-0.0297364	0.0608121	0.624849
Osteomyelitis	Dementia in Alzheimer disease	rs12600041	G	A	0.115761	0.0249804	3.58525e-06	-0.00476898	0.0257146	0.85287
Osteomyelitis	Dementia in Alzheimer disease	rs12959355	T	C	0.108071	0.0227243	1.97706e-06	0.006224	0.0259193	0.810229
Osteomyelitis	Dementia in Alzheimer disease	rs13066540	C	T	0.0977558	0.0213394	4.62732e-06	-0.00881791	0.0228826	0.699974
Osteomyelitis	Dementia in Alzheimer disease	rs13315366	T	C	0.126375	0.0259479	1.11406e-06	-0.0151487	0.0282442	0.591718
Osteomyelitis	Dementia in Alzheimer disease	rs189802422	C	A	-0.559866	0.122082	4.51835e-06	0.063752	0.16294	0.695604
Osteomyelitis	Dementia in Alzheimer disease	rs34677828	C	T	-0.292401	0.0635532	4.20707e-06	0.244529	0.0960765	0.0109232
Osteomyelitis	Dementia in Alzheimer disease	rs35918350	T	C	0.197096	0.0431029	4.81526e-06	0.0273482	0.0338076	0.418553
Osteomyelitis	Dementia	rs117366634	A	G	-0.465874	0.0952783	1.01035e-06	-0.0212832	0.0363776	0.558506
Osteomyelitis	Dementia	rs12600041	G	A	0.115761	0.0249804	3.58525e-06	-0.013007	0.0154087	0.398594
Osteomyelitis	Dementia	rs12959355	T	C	0.108071	0.0227243	1.97706e-06	0.0109544	0.0155217	0.480344
Osteomyelitis	Dementia	rs13066540	C	T	0.0977558	0.0213394	4.62732e-06	0.00273316	0.0136932	0.841794
Osteomyelitis	Dementia	rs13315366	T	C	0.126375	0.0259479	1.11406e-06	-0.0274719	0.0169436	0.104937
Osteomyelitis	Dementia	rs189802422	C	A	-0.559866	0.122082	4.51835e-06	0.171051	0.0955438	0.0734074
Osteomyelitis	Dementia	rs34677828	C	T	-0.292401	0.0635532	4.20707e-06	-0.0094248	0.0615368	0.878274
Osteomyelitis	Dementia	rs35918350	T	C	0.197096	0.0431029	4.81526e-06	0.0239404	0.0203654	0.239778
Osteomyelitis	Unspecified dementia	rs117366634	A	G	-0.465874	0.0952783	1.01035e-06	-0.0471262	0.0700154	0.500894
Osteomyelitis	Unspecified dementia	rs12600041	G	A	0.115761	0.0249804	3.58525e-06	0.00741995	0.0295806	0.801939
Osteomyelitis	Unspecified dementia	rs12959355	T	C	0.108071	0.0227243	1.97706e-06	-0.00701814	0.0296714	0.813022
Osteomyelitis	Unspecified dementia	rs13066540	C	T	0.0977558	0.0213394	4.62732e-06	-0.005729	0.0262419	0.827183
Osteomyelitis	Unspecified dementia	rs13315366	T	C	0.126375	0.0259479	1.11406e-06	-0.0207013	0.0323638	0.522403
Osteomyelitis	Unspecified dementia	rs189802422	C	A	-0.559866	0.122082	4.51835e-06	0.244931	0.184903	0.185288
Osteomyelitis	Unspecified dementia	rs34677828	C	T	-0.292401	0.0635532	4.20707e-06	-0.103411	0.117965	0.38069
Osteomyelitis	Unspecified dementia	rs35918350	T	C	0.197096	0.0431029	4.81526e-06	0.0123225	0.0393901	0.754408
Osteomyelitis	Vascular dementia	rs117366634	A	G	-0.465874	0.0952783	1.01035e-06	-0.00545148	0.0862545	0.949605
Osteomyelitis	Vascular dementia	rs12600041	G	A	0.115761	0.0249804	3.58525e-06	-0.0108777	0.0366803	0.766807
Osteomyelitis	Vascular dementia	rs12959355	T	C	0.108071	0.0227243	1.97706e-06	0.0278012	0.0367123	0.448887
Osteomyelitis	Vascular dementia	rs13066540	C	T	0.0977558	0.0213394	4.62732e-06	-0.0344395	0.0323774	0.28747
Osteomyelitis	Vascular dementia	rs13315366	T	C	0.126375	0.0259479	1.11406e-06	-0.0474542	0.0400468	0.23603
Osteomyelitis	Vascular dementia	rs189802422	C	A	-0.559866	0.122082	4.51835e-06	0.339592	0.227842	0.1361
Osteomyelitis	Vascular dementia	rs34677828	C	T	-0.292401	0.0635532	4.20707e-06	-0.226102	0.147148	0.124401
Osteomyelitis	Vascular dementia	rs35918350	T	C	0.197096	0.0431029	4.81526e-06	0.0946685	0.0485776	0.051318
Osteomyelitis	Frontotemporal dementia, wide, incl. Pick's disease	rs117366634	A	G	-0.465874	0.0952783	1.01035e-06	0.384787	0.332452	0.2471
Osteomyelitis	Frontotemporal dementia, wide, incl. Pick's disease	rs12600041	G	A	0.115761	0.0249804	3.58525e-06	-0.029628	0.145523	0.838669
Osteomyelitis	Frontotemporal dementia, wide, incl. Pick's disease	rs12959355	T	C	0.108071	0.0227243	1.97706e-06	-0.0560296	0.148642	0.706215
Osteomyelitis	Frontotemporal dementia, wide, incl. Pick's disease	rs13066540	C	T	0.0977558	0.0213394	4.62732e-06	0.174794	0.131062	0.182311
Osteomyelitis	Frontotemporal dementia, wide, incl. Pick's disease	rs13315366	T	C	0.126375	0.0259479	1.11406e-06	-0.037706	0.163025	0.81709
Osteomyelitis	Frontotemporal dementia, wide, incl. Pick's disease	rs189802422	C	A	-0.559866	0.122082	4.51835e-06	0.83327	0.950715	0.380776
Osteomyelitis	Frontotemporal dementia, wide, incl. Pick's disease	rs34677828	C	T	-0.292401	0.0635532	4.20707e-06	-0.238595	0.629704	0.704761
Osteomyelitis	Frontotemporal dementia, wide, incl. Pick's disease	rs35918350	T	C	0.197096	0.0431029	4.81526e-06	-0.240518	0.191914	0.210112
Meniscus derangement	Dementia with Lewy bodies	rs10406463	G	A	0.048611	0.0104836	3.53704e-06	0.0148142	0.0378221	0.695304
Meniscus derangement	Dementia with Lewy bodies	rs10736167	T	C	-0.077898	0.0162388	1.61027e-06	-0.00225745	0.0514731	0.964986
Meniscus derangement	Dementia with Lewy bodies	rs10861879	A	G	-0.0482811	0.0105671	4.90038e-06	0.0879468	0.0398197	0.0271963
Meniscus derangement	Dementia with Lewy bodies	rs114539878	C	T	-0.18337	0.036013	3.54748e-07	-0.0745102	0.0992292	0.452719
Meniscus derangement	Dementia with Lewy bodies	rs117300515	G	A	0.550057	0.119862	4.45164e-06	0.0315665	0.179555	0.860443
Meniscus derangement	Dementia with Lewy bodies	rs12407338	A	G	-0.0505998	0.0110187	4.38622e-06	0.0040219	0.0415391	0.922883
Meniscus derangement	Dementia with Lewy bodies	rs12645533	G	T	0.0908773	0.0192201	2.26485e-06	0.0626085	0.0672209	0.351666
Meniscus derangement	Dementia with Lewy bodies	rs1264622	T	C	0.0699711	0.0142088	8.45843e-07	0.00910839	0.0487208	0.851671
Meniscus derangement	Dementia with Lewy bodies	rs12830284	C	A	-0.0486263	0.0102573	2.13054e-06	-0.017372	0.0370547	0.639206
Meniscus derangement	Dementia with Lewy bodies	rs13076741	C	T	0.0508766	0.0105155	1.31e-06	-0.0383068	0.0399412	0.33753
Meniscus derangement	Dementia with Lewy bodies	rs1393972	A	C	-0.0514291	0.0111811	4.23224e-06	-0.0938734	0.0395454	0.0176052
Meniscus derangement	Dementia with Lewy bodies	rs143299874	G	C	0.153431	0.033451	4.50236e-06	0.118396	0.090307	0.189829
Meniscus derangement	Dementia with Lewy bodies	rs143383	A	G	0.080643	0.010425	1.02967e-14	-0.020714	0.0385746	0.591213
Meniscus derangement	Dementia with Lewy bodies	rs143847405	A	G	-0.112256	0.024461	4.44979e-06	0.0577782	0.0773445	0.455083
Meniscus derangement	Dementia with Lewy bodies	rs171937	C	T	-0.0531865	0.0107122	6.86815e-07	0.0514343	0.0413614	0.213673
Meniscus derangement	Dementia with Lewy bodies	rs2171126	T	C	0.0480187	0.0102085	2.55358e-06	0.0406524	0.036829	0.269626
Meniscus derangement	Dementia with Lewy bodies	rs2350205	G	T	0.0520383	0.0103876	5.45343e-07	0.0302867	0.0409868	0.459955
Meniscus derangement	Dementia with Lewy bodies	rs270397	A	G	-0.0554177	0.0102194	5.8684e-08	0.0484017	0.0371982	0.193197
Meniscus derangement	Dementia with Lewy bodies	rs2720588	C	A	0.0561224	0.01117	5.0501e-07	0.0125213	0.0395252	0.751427
Meniscus derangement	Dementia with Lewy bodies	rs2732227	A	G	-0.0530137	0.0113277	2.8686e-06	-0.0218541	0.0398269	0.583193
Meniscus derangement	Dementia with Lewy bodies	rs2820449	A	G	0.0484737	0.0106175	4.9846e-06	-0.0679074	0.0397498	0.0875669
Meniscus derangement	Dementia with Lewy bodies	rs2832231	C	T	0.049113	0.0106581	4.06481e-06	0.0899961	0.0384117	0.0191351
Meniscus derangement	Dementia with Lewy bodies	rs28581519	A	G	-0.0704484	0.0140921	5.75838e-07	-0.0420634	0.0538125	0.434408
Meniscus derangement	Dementia with Lewy bodies	rs3118905	A	G	-0.0600597	0.0111106	6.45907e-08	-0.066657	0.0410039	0.10403
Meniscus derangement	Dementia with Lewy bodies	rs333453	A	T	-0.0574688	0.011425	4.90241e-07	0.0510733	0.0409789	0.212633
Meniscus derangement	Dementia with Lewy bodies	rs34049648	A	G	0.0497289	0.0103052	1.39566e-06	0.0309365	0.0394233	0.432667
Meniscus derangement	Dementia with Lewy bodies	rs35316639	A	G	0.0483776	0.0104838	3.94022e-06	-0.000299955	0.0368541	0.993597
Meniscus derangement	Dementia with Lewy bodies	rs35958750	T	C	-0.0670267	0.0145057	3.82393e-06	0.0213211	0.0480925	0.657484
Meniscus derangement	Dementia with Lewy bodies	rs41274604	C	T	0.124001	0.0262455	2.30531e-06	0.168738	0.0998612	0.0910878
Meniscus derangement	Dementia with Lewy bodies	rs4547914	T	C	0.110365	0.0233321	2.24321e-06	0.0232707	0.0987653	0.813734
Meniscus derangement	Dementia with Lewy bodies	rs4811309	A	G	-0.049134	0.0102665	1.70247e-06	-0.0185764	0.0384528	0.629054
Meniscus derangement	Dementia with Lewy bodies	rs4845298	C	T	-0.0488203	0.0104476	2.96982e-06	-0.0410356	0.0367112	0.263657
Meniscus derangement	Dementia with Lewy bodies	rs60078706	A	G	0.0484625	0.0103161	2.63039e-06	0.0071505	0.0370005	0.846769
Meniscus derangement	Dementia with Lewy bodies	rs6994642	T	C	0.0736357	0.0156514	2.54208e-06	-0.0886006	0.0666702	0.183869
Meniscus derangement	Dementia with Lewy bodies	rs9321725	T	C	-0.0476841	0.0104211	4.74559e-06	0.0564465	0.0386836	0.144539
Meniscus derangement	Dementia with Lewy bodies	rs9726352	A	G	0.0600507	0.011255	9.52928e-08	-0.0885419	0.041703	0.0337334
Meniscus derangement	Dementia with Lewy bodies	rs9858826	G	A	-0.0545545	0.0116592	2.88138e-06	0.0102572	0.042414	0.808864
Meniscus derangement	Dementia with Lewy bodies	rs9883248	G	A	-0.046709	0.0102321	4.99597e-06	-0.0645791	0.036781	0.0791225
Meniscus derangement	Dementia in Alzheimer disease	rs10406463	G	A	0.048611	0.0104836	3.53704e-06	0.0467738	0.023315	0.0448384
Meniscus derangement	Dementia in Alzheimer disease	rs10736167	T	C	-0.077898	0.0162388	1.61027e-06	-0.035359	0.036562	0.333496
Meniscus derangement	Dementia in Alzheimer disease	rs10861879	A	G	-0.0482811	0.0105671	4.90038e-06	-0.0182938	0.0233584	0.433523
Meniscus derangement	Dementia in Alzheimer disease	rs114539878	C	T	-0.18337	0.036013	3.54748e-07	-0.184082	0.0752368	0.0144172
Meniscus derangement	Dementia in Alzheimer disease	rs117300515	G	A	0.550057	0.119862	4.45164e-06	-0.264108	0.329911	0.423397
Meniscus derangement	Dementia in Alzheimer disease	rs118152212	T	C	0.218316	0.0413564	1.29972e-07	-0.029338	0.0984208	0.765637
Meniscus derangement	Dementia in Alzheimer disease	rs12407338	A	G	-0.0505998	0.0110187	4.38622e-06	-0.0324177	0.0243381	0.182869
Meniscus derangement	Dementia in Alzheimer disease	rs12645533	G	T	0.0908773	0.0192201	2.26485e-06	0.013609	0.0439941	0.757065
Meniscus derangement	Dementia in Alzheimer disease	rs1264622	T	C	0.0699711	0.0142088	8.45843e-07	-0.0463933	0.0323905	0.152055
Meniscus derangement	Dementia in Alzheimer disease	rs12830284	C	A	-0.0486263	0.0102573	2.13054e-06	0.0232673	0.0227959	0.307407
Meniscus derangement	Dementia in Alzheimer disease	rs13076741	C	T	0.0508766	0.0105155	1.31e-06	-0.0324848	0.0233417	0.164012
Meniscus derangement	Dementia in Alzheimer disease	rs1359070	C	T	0.0607553	0.0129297	2.61571e-06	-0.012019	0.0290585	0.679158
Meniscus derangement	Dementia in Alzheimer disease	rs137939848	C	G	0.0854479	0.0177406	1.46083e-06	0.0259895	0.0404569	0.520614
Meniscus derangement	Dementia in Alzheimer disease	rs1393972	A	C	-0.0514291	0.0111811	4.23224e-06	0.0532906	0.0247973	0.0316308
Meniscus derangement	Dementia in Alzheimer disease	rs143299874	G	C	0.153431	0.033451	4.50236e-06	-0.00582269	0.0779066	0.940422
Meniscus derangement	Dementia in Alzheimer disease	rs143383	A	G	0.080643	0.010425	1.02967e-14	-0.00467913	0.0231299	0.839684
Meniscus derangement	Dementia in Alzheimer disease	rs143847405	A	G	-0.112256	0.024461	4.44979e-06	0.0671796	0.0536908	0.210851
Meniscus derangement	Dementia in Alzheimer disease	rs148320793	A	G	0.317919	0.0639123	6.54847e-07	0.082851	0.153382	0.589085
Meniscus derangement	Dementia in Alzheimer disease	rs171937	C	T	-0.0531865	0.0107122	6.86815e-07	-0.0386301	0.0236799	0.102817
Meniscus derangement	Dementia in Alzheimer disease	rs2171126	T	C	0.0480187	0.0102085	2.55358e-06	-0.0152104	0.0227348	0.503474
Meniscus derangement	Dementia in Alzheimer disease	rs2350205	G	T	0.0520383	0.0103876	5.45343e-07	0.0273756	0.0232571	0.239162
Meniscus derangement	Dementia in Alzheimer disease	rs255575	C	T	0.0486458	0.0102639	2.14264e-06	-0.00415657	0.0228047	0.855372
Meniscus derangement	Dementia in Alzheimer disease	rs270397	A	G	-0.0554177	0.0102194	5.8684e-08	0.000391773	0.0226978	0.986229
Meniscus derangement	Dementia in Alzheimer disease	rs2720588	C	A	0.0561224	0.01117	5.0501e-07	0.0430126	0.0249809	0.085102
Meniscus derangement	Dementia in Alzheimer disease	rs2732227	A	G	-0.0530137	0.0113277	2.8686e-06	-0.00818122	0.024983	0.743312
Meniscus derangement	Dementia in Alzheimer disease	rs2820449	A	G	0.0484737	0.0106175	4.9846e-06	-0.0319851	0.0237207	0.177527
Meniscus derangement	Dementia in Alzheimer disease	rs2832231	C	T	0.049113	0.0106581	4.06481e-06	-0.00124093	0.0238238	0.958459
Meniscus derangement	Dementia in Alzheimer disease	rs28581519	A	G	-0.0704484	0.0140921	5.75838e-07	0.0278151	0.0310495	0.370343
Meniscus derangement	Dementia in Alzheimer disease	rs3118905	A	G	-0.0600597	0.0111106	6.45907e-08	0.0119433	0.024612	0.62749
Meniscus derangement	Dementia in Alzheimer disease	rs333453	A	T	-0.0574688	0.011425	4.90241e-07	0.0107989	0.0252443	0.668813
Meniscus derangement	Dementia in Alzheimer disease	rs34049648	A	G	0.0497289	0.0103052	1.39566e-06	0.00464619	0.022967	0.839684
Meniscus derangement	Dementia in Alzheimer disease	rs35316639	A	G	0.0483776	0.0104838	3.94022e-06	0.00649962	0.0232162	0.779507
Meniscus derangement	Dementia in Alzheimer disease	rs35958750	T	C	-0.0670267	0.0145057	3.82393e-06	-0.00473929	0.0319318	0.882012
Meniscus derangement	Dementia in Alzheimer disease	rs3771517	T	C	-0.050517	0.0107232	2.46479e-06	-0.00954565	0.0238612	0.68912
Meniscus derangement	Dementia in Alzheimer disease	rs41274604	C	T	0.124001	0.0262455	2.30531e-06	-0.0333646	0.0606053	0.58196
Meniscus derangement	Dementia in Alzheimer disease	rs4547914	T	C	0.110365	0.0233321	2.24321e-06	0.049849	0.0509575	0.327952
Meniscus derangement	Dementia in Alzheimer disease	rs4811309	A	G	-0.049134	0.0102665	1.70247e-06	0.00660678	0.0228925	0.772887
Meniscus derangement	Dementia in Alzheimer disease	rs4845298	C	T	-0.0488203	0.0104476	2.96982e-06	0.00229002	0.0232737	0.921619
Meniscus derangement	Dementia in Alzheimer disease	rs60078706	A	G	0.0484625	0.0103161	2.63039e-06	0.0222236	0.0230166	0.33427
Meniscus derangement	Dementia in Alzheimer disease	rs6994642	T	C	0.0736357	0.0156514	2.54208e-06	-0.0313394	0.0354055	0.376073
Meniscus derangement	Dementia in Alzheimer disease	rs7722739	T	G	-0.100577	0.0184672	5.14434e-08	-0.0238303	0.04031	0.554402
Meniscus derangement	Dementia in Alzheimer disease	rs77899930	A	G	0.133744	0.0284753	2.6421e-06	-0.0511148	0.0650626	0.432088
Meniscus derangement	Dementia in Alzheimer disease	rs9321725	T	C	-0.0476841	0.0104211	4.74559e-06	-0.00890278	0.0231645	0.700735
Meniscus derangement	Dementia in Alzheimer disease	rs9726352	A	G	0.0600507	0.011255	9.52928e-08	0.0073372	0.0249151	0.768385
Meniscus derangement	Dementia in Alzheimer disease	rs9858826	G	A	-0.0545545	0.0116592	2.88138e-06	0.00758725	0.0259318	0.769839
Meniscus derangement	Dementia in Alzheimer disease	rs9883248	G	A	-0.046709	0.0102321	4.99597e-06	0.041081	0.0228443	0.072129
Meniscus derangement	Dementia	rs10406463	G	A	0.048611	0.0104836	3.53704e-06	0.0339265	0.0139392	0.0149376
Meniscus derangement	Dementia	rs10736167	T	C	-0.077898	0.0162388	1.61027e-06	-0.0378038	0.0217718	0.0824992
Meniscus derangement	Dementia	rs10861879	A	G	-0.0482811	0.0105671	4.90038e-06	0.00775062	0.0140103	0.580122
Meniscus derangement	Dementia	rs114539878	C	T	-0.18337	0.036013	3.54748e-07	-0.0155621	0.0453892	0.731703
Meniscus derangement	Dementia	rs117300515	G	A	0.550057	0.119862	4.45164e-06	0.215296	0.189862	0.25681
Meniscus derangement	Dementia	rs118152212	T	C	0.218316	0.0413564	1.29972e-07	0.0369618	0.0583342	0.526329
Meniscus derangement	Dementia	rs12407338	A	G	-0.0505998	0.0110187	4.38622e-06	-0.0238714	0.0146165	0.10243
Meniscus derangement	Dementia	rs12645533	G	T	0.0908773	0.0192201	2.26485e-06	0.0510672	0.0262488	0.0517142
Meniscus derangement	Dementia	rs1264622	T	C	0.0699711	0.0142088	8.45843e-07	-0.0420648	0.0192815	0.0291387
Meniscus derangement	Dementia	rs12830284	C	A	-0.0486263	0.0102573	2.13054e-06	0.0268156	0.0136479	0.0494356
Meniscus derangement	Dementia	rs13076741	C	T	0.0508766	0.0105155	1.31e-06	-0.00205416	0.013987	0.883241
Meniscus derangement	Dementia	rs1359070	C	T	0.0607553	0.0129297	2.61571e-06	-0.012554	0.0174175	0.471051
Meniscus derangement	Dementia	rs137939848	C	G	0.0854479	0.0177406	1.46083e-06	-0.00124926	0.024213	0.958852
Meniscus derangement	Dementia	rs1393972	A	C	-0.0514291	0.0111811	4.23224e-06	0.022309	0.0148248	0.132365
Meniscus derangement	Dementia	rs143299874	G	C	0.153431	0.033451	4.50236e-06	-0.0218574	0.0464377	0.637868
Meniscus derangement	Dementia	rs143383	A	G	0.080643	0.010425	1.02967e-14	-0.000718551	0.0138571	0.958645
Meniscus derangement	Dementia	rs143847405	A	G	-0.112256	0.024461	4.44979e-06	0.0296625	0.0320323	0.354436
Meniscus derangement	Dementia	rs148320793	A	G	0.317919	0.0639123	6.54847e-07	-0.0625147	0.0928111	0.500585
Meniscus derangement	Dementia	rs171937	C	T	-0.0531865	0.0107122	6.86815e-07	-0.0306023	0.0141849	0.0309749
Meniscus derangement	Dementia	rs2171126	T	C	0.0480187	0.0102085	2.55358e-06	-0.00219683	0.0135885	0.871567
Meniscus derangement	Dementia	rs2350205	G	T	0.0520383	0.0103876	5.45343e-07	-0.00926994	0.013902	0.504897
Meniscus derangement	Dementia	rs255575	C	T	0.0486458	0.0102639	2.14264e-06	-0.0194272	0.013661	0.155
Meniscus derangement	Dementia	rs270397	A	G	-0.0554177	0.0102194	5.8684e-08	-0.0173103	0.0136044	0.203229
Meniscus derangement	Dementia	rs2720588	C	A	0.0561224	0.01117	5.0501e-07	0.0194507	0.0149318	0.192699
Meniscus derangement	Dementia	rs2732227	A	G	-0.0530137	0.0113277	2.8686e-06	-0.0204828	0.0150363	0.173126
Meniscus derangement	Dementia	rs2820449	A	G	0.0484737	0.0106175	4.9846e-06	-0.0259378	0.0141978	0.0677174
Meniscus derangement	Dementia	rs2832231	C	T	0.049113	0.0106581	4.06481e-06	0.00367534	0.0142835	0.796936
Meniscus derangement	Dementia	rs28581519	A	G	-0.0704484	0.0140921	5.75838e-07	-0.0147189	0.0185873	0.428431
Meniscus derangement	Dementia	rs3118905	A	G	-0.0600597	0.0111106	6.45907e-08	-0.00913703	0.0147331	0.535147
Meniscus derangement	Dementia	rs333453	A	T	-0.0574688	0.011425	4.90241e-07	0.00567074	0.0150893	0.707056
Meniscus derangement	Dementia	rs34049648	A	G	0.0497289	0.0103052	1.39566e-06	-0.00192389	0.0137571	0.88878
Meniscus derangement	Dementia	rs35316639	A	G	0.0483776	0.0104838	3.94022e-06	0.00349198	0.0138913	0.801522
Meniscus derangement	Dementia	rs35958750	T	C	-0.0670267	0.0145057	3.82393e-06	-0.0263392	0.0191605	0.169238
Meniscus derangement	Dementia	rs3771517	T	C	-0.050517	0.0107232	2.46479e-06	-0.0195127	0.0143013	0.172442
Meniscus derangement	Dementia	rs41274604	C	T	0.124001	0.0262455	2.30531e-06	-0.0041979	0.0363296	0.908009
Meniscus derangement	Dementia	rs4547914	T	C	0.110365	0.0233321	2.24321e-06	0.0253413	0.0305129	0.406251
Meniscus derangement	Dementia	rs4811309	A	G	-0.049134	0.0102665	1.70247e-06	-0.000873846	0.0136697	0.949029
Meniscus derangement	Dementia	rs4845298	C	T	-0.0488203	0.0104476	2.96982e-06	-0.00419773	0.0139356	0.763243
Meniscus derangement	Dementia	rs60078706	A	G	0.0484625	0.0103161	2.63039e-06	0.0131945	0.0137648	0.337774
Meniscus derangement	Dementia	rs6994642	T	C	0.0736357	0.0156514	2.54208e-06	-0.0325716	0.0211748	0.123994
Meniscus derangement	Dementia	rs7722739	T	G	-0.100577	0.0184672	5.14434e-08	-0.0209814	0.0241091	0.384155
Meniscus derangement	Dementia	rs77899930	A	G	0.133744	0.0284753	2.6421e-06	-0.056362	0.0391314	0.149774
Meniscus derangement	Dementia	rs9321725	T	C	-0.0476841	0.0104211	4.74559e-06	0.015526	0.0138694	0.262952
Meniscus derangement	Dementia	rs9726352	A	G	0.0600507	0.011255	9.52928e-08	0.00874235	0.0148911	0.557147
Meniscus derangement	Dementia	rs9858826	G	A	-0.0545545	0.0116592	2.88138e-06	0.00184732	0.0154799	0.905009
Meniscus derangement	Dementia	rs9883248	G	A	-0.046709	0.0102321	4.99597e-06	0.0205004	0.0136575	0.133347
Meniscus derangement	Unspecified dementia	rs10406463	G	A	0.048611	0.0104836	3.53704e-06	0.0173514	0.0267839	0.517095
Meniscus derangement	Unspecified dementia	rs10736167	T	C	-0.077898	0.0162388	1.61027e-06	-0.0519125	0.0414359	0.210265
Meniscus derangement	Unspecified dementia	rs10861879	A	G	-0.0482811	0.0105671	4.90038e-06	0.0313576	0.0268328	0.242553
Meniscus derangement	Unspecified dementia	rs114539878	C	T	-0.18337	0.036013	3.54748e-07	-0.0701362	0.0851166	0.409939
Meniscus derangement	Unspecified dementia	rs117300515	G	A	0.550057	0.119862	4.45164e-06	0.455409	0.367867	0.215726
Meniscus derangement	Unspecified dementia	rs118152212	T	C	0.218316	0.0413564	1.29972e-07	0.0381212	0.113126	0.736133
Meniscus derangement	Unspecified dementia	rs12407338	A	G	-0.0505998	0.0110187	4.38622e-06	-0.0224893	0.0279804	0.42154
Meniscus derangement	Unspecified dementia	rs12645533	G	T	0.0908773	0.0192201	2.26485e-06	0.0684975	0.0506022	0.175849
Meniscus derangement	Unspecified dementia	rs1264622	T	C	0.0699711	0.0142088	8.45843e-07	-0.0715951	0.0368039	0.0517369
Meniscus derangement	Unspecified dementia	rs12830284	C	A	-0.0486263	0.0102573	2.13054e-06	0.0430304	0.0261821	0.100279
Meniscus derangement	Unspecified dementia	rs13076741	C	T	0.0508766	0.0105155	1.31e-06	-0.0111193	0.026712	0.677216
Meniscus derangement	Unspecified dementia	rs1359070	C	T	0.0607553	0.0129297	2.61571e-06	-0.0327213	0.0333088	0.325921
Meniscus derangement	Unspecified dementia	rs137939848	C	G	0.0854479	0.0177406	1.46083e-06	-0.0130201	0.0466764	0.780288
Meniscus derangement	Unspecified dementia	rs1393972	A	C	-0.0514291	0.0111811	4.23224e-06	0.0240798	0.0284283	0.396976
Meniscus derangement	Unspecified dementia	rs143299874	G	C	0.153431	0.033451	4.50236e-06	-0.0736371	0.0891964	0.409053
Meniscus derangement	Unspecified dementia	rs143383	A	G	0.080643	0.010425	1.02967e-14	0.0335553	0.0265225	0.205813
Meniscus derangement	Unspecified dementia	rs143847405	A	G	-0.112256	0.024461	4.44979e-06	-0.0108628	0.0612931	0.85933
Meniscus derangement	Unspecified dementia	rs148320793	A	G	0.317919	0.0639123	6.54847e-07	-0.0653665	0.184239	0.722747
Meniscus derangement	Unspecified dementia	rs171937	C	T	-0.0531865	0.0107122	6.86815e-07	-0.029465	0.0271848	0.27842
Meniscus derangement	Unspecified dementia	rs2171126	T	C	0.0480187	0.0102085	2.55358e-06	0.00999455	0.026034	0.70105
Meniscus derangement	Unspecified dementia	rs2350205	G	T	0.0520383	0.0103876	5.45343e-07	-0.00247347	0.0266802	0.926135
Meniscus derangement	Unspecified dementia	rs255575	C	T	0.0486458	0.0102639	2.14264e-06	-0.0209669	0.0261252	0.422233
Meniscus derangement	Unspecified dementia	rs270397	A	G	-0.0554177	0.0102194	5.8684e-08	-0.0268647	0.0260263	0.301972
Meniscus derangement	Unspecified dementia	rs2720588	C	A	0.0561224	0.01117	5.0501e-07	0.0276649	0.0285304	0.332213
Meniscus derangement	Unspecified dementia	rs2732227	A	G	-0.0530137	0.0113277	2.8686e-06	-0.0324897	0.0287489	0.258425
Meniscus derangement	Unspecified dementia	rs2820449	A	G	0.0484737	0.0106175	4.9846e-06	-0.0138037	0.0271876	0.611649
Meniscus derangement	Unspecified dementia	rs2832231	C	T	0.049113	0.0106581	4.06481e-06	0.0338253	0.0273326	0.215884
Meniscus derangement	Unspecified dementia	rs28581519	A	G	-0.0704484	0.0140921	5.75838e-07	-0.0408234	0.0356892	0.252682
Meniscus derangement	Unspecified dementia	rs3118905	A	G	-0.0600597	0.0111106	6.45907e-08	0.0311706	0.0282504	0.269867
Meniscus derangement	Unspecified dementia	rs333453	A	T	-0.0574688	0.011425	4.90241e-07	0.00128272	0.028915	0.964616
Meniscus derangement	Unspecified dementia	rs34049648	A	G	0.0497289	0.0103052	1.39566e-06	0.00223229	0.0263685	0.932534
Meniscus derangement	Unspecified dementia	rs35316639	A	G	0.0483776	0.0104838	3.94022e-06	0.0350249	0.0266624	0.188965
Meniscus derangement	Unspecified dementia	rs35958750	T	C	-0.0670267	0.0145057	3.82393e-06	-0.0709865	0.0366601	0.0528263
Meniscus derangement	Unspecified dementia	rs3771517	T	C	-0.050517	0.0107232	2.46479e-06	0.00568008	0.0274113	0.835841
Meniscus derangement	Unspecified dementia	rs41274604	C	T	0.124001	0.0262455	2.30531e-06	-0.0589963	0.0699812	0.399211
Meniscus derangement	Unspecified dementia	rs4547914	T	C	0.110365	0.0233321	2.24321e-06	0.0222177	0.0582616	0.702949
Meniscus derangement	Unspecified dementia	rs4811309	A	G	-0.049134	0.0102665	1.70247e-06	-0.0214661	0.0262197	0.412956
Meniscus derangement	Unspecified dementia	rs4845298	C	T	-0.0488203	0.0104476	2.96982e-06	-0.0485221	0.0267152	0.0693282
Meniscus derangement	Unspecified dementia	rs60078706	A	G	0.0484625	0.0103161	2.63039e-06	0.0326118	0.0263683	0.216167
Meniscus derangement	Unspecified dementia	rs6994642	T	C	0.0736357	0.0156514	2.54208e-06	-0.115205	0.0417371	0.00577537
Meniscus derangement	Unspecified dementia	rs7722739	T	G	-0.100577	0.0184672	5.14434e-08	-0.0568414	0.0467796	0.224332
Meniscus derangement	Unspecified dementia	rs77899930	A	G	0.133744	0.0284753	2.6421e-06	-0.159249	0.0755208	0.0349728
Meniscus derangement	Unspecified dementia	rs9321725	T	C	-0.0476841	0.0104211	4.74559e-06	0.0121599	0.0266462	0.648142
Meniscus derangement	Unspecified dementia	rs9726352	A	G	0.0600507	0.011255	9.52928e-08	-0.00165282	0.0285903	0.953899
Meniscus derangement	Unspecified dementia	rs9858826	G	A	-0.0545545	0.0116592	2.88138e-06	-0.00452411	0.0297414	0.879096
Meniscus derangement	Unspecified dementia	rs9883248	G	A	-0.046709	0.0102321	4.99597e-06	0.0278267	0.0262212	0.288585
Meniscus derangement	Vascular dementia	rs10406463	G	A	0.048611	0.0104836	3.53704e-06	-0.00364468	0.0331474	0.912446
Meniscus derangement	Vascular dementia	rs10736167	T	C	-0.077898	0.0162388	1.61027e-06	-0.0655544	0.051569	0.203658
Meniscus derangement	Vascular dementia	rs10861879	A	G	-0.0482811	0.0105671	4.90038e-06	0.0405983	0.0331138	0.22019
Meniscus derangement	Vascular dementia	rs114539878	C	T	-0.18337	0.036013	3.54748e-07	-0.0900634	0.106167	0.396262
Meniscus derangement	Vascular dementia	rs117300515	G	A	0.550057	0.119862	4.45164e-06	0.0589236	0.448218	0.89541
Meniscus derangement	Vascular dementia	rs118152212	T	C	0.218316	0.0413564	1.29972e-07	0.186781	0.13933	0.180062
Meniscus derangement	Vascular dementia	rs12407338	A	G	-0.0505998	0.0110187	4.38622e-06	-0.0439189	0.0346176	0.204552
Meniscus derangement	Vascular dementia	rs12645533	G	T	0.0908773	0.0192201	2.26485e-06	0.0261956	0.0623429	0.674349
Meniscus derangement	Vascular dementia	rs1264622	T	C	0.0699711	0.0142088	8.45843e-07	-0.0756742	0.0454287	0.0957569
Meniscus derangement	Vascular dementia	rs12830284	C	A	-0.0486263	0.0102573	2.13054e-06	-0.0237026	0.0323547	0.463812
Meniscus derangement	Vascular dementia	rs13076741	C	T	0.0508766	0.0105155	1.31e-06	0.017874	0.0331052	0.589256
Meniscus derangement	Vascular dementia	rs1359070	C	T	0.0607553	0.0129297	2.61571e-06	-0.0437139	0.0413367	0.290279
Meniscus derangement	Vascular dementia	rs137939848	C	G	0.0854479	0.0177406	1.46083e-06	-0.0548515	0.0573223	0.33862
Meniscus derangement	Vascular dementia	rs1393972	A	C	-0.0514291	0.0111811	4.23224e-06	0.00557476	0.0352081	0.874191
Meniscus derangement	Vascular dementia	rs143299874	G	C	0.153431	0.033451	4.50236e-06	-0.0503226	0.110027	0.647409
Meniscus derangement	Vascular dementia	rs143383	A	G	0.080643	0.010425	1.02967e-14	-0.0226127	0.0328306	0.490969
Meniscus derangement	Vascular dementia	rs143847405	A	G	-0.112256	0.024461	4.44979e-06	-0.166921	0.0759019	0.0278663
Meniscus derangement	Vascular dementia	rs148320793	A	G	0.317919	0.0639123	6.54847e-07	0.133093	0.227251	0.558101
Meniscus derangement	Vascular dementia	rs171937	C	T	-0.0531865	0.0107122	6.86815e-07	-0.0178773	0.0335754	0.594411
Meniscus derangement	Vascular dementia	rs2171126	T	C	0.0480187	0.0102085	2.55358e-06	-0.010578	0.0322361	0.742804
Meniscus derangement	Vascular dementia	rs2350205	G	T	0.0520383	0.0103876	5.45343e-07	-0.0111761	0.0330133	0.734961
Meniscus derangement	Vascular dementia	rs255575	C	T	0.0486458	0.0102639	2.14264e-06	-0.0384809	0.0323274	0.23391
Meniscus derangement	Vascular dementia	rs270397	A	G	-0.0554177	0.0102194	5.8684e-08	-0.0113854	0.0321977	0.723632
Meniscus derangement	Vascular dementia	rs2720588	C	A	0.0561224	0.01117	5.0501e-07	0.0313523	0.0354546	0.376537
Meniscus derangement	Vascular dementia	rs2732227	A	G	-0.0530137	0.0113277	2.8686e-06	-0.0758582	0.0355459	0.0328352
Meniscus derangement	Vascular dementia	rs2820449	A	G	0.0484737	0.0106175	4.9846e-06	-0.0593478	0.0336404	0.0777016
Meniscus derangement	Vascular dementia	rs2832231	C	T	0.049113	0.0106581	4.06481e-06	-0.0553878	0.0337521	0.100793
Meniscus derangement	Vascular dementia	rs28581519	A	G	-0.0704484	0.0140921	5.75838e-07	-0.030879	0.0441767	0.484559
Meniscus derangement	Vascular dementia	rs3118905	A	G	-0.0600597	0.0111106	6.45907e-08	-0.00531997	0.0349225	0.878922
Meniscus derangement	Vascular dementia	rs333453	A	T	-0.0574688	0.011425	4.90241e-07	-0.0056289	0.0357057	0.874735
Meniscus derangement	Vascular dementia	rs34049648	A	G	0.0497289	0.0103052	1.39566e-06	-0.010483	0.0326383	0.748068
Meniscus derangement	Vascular dementia	rs35316639	A	G	0.0483776	0.0104838	3.94022e-06	0.00774647	0.0327846	0.813213
Meniscus derangement	Vascular dementia	rs35958750	T	C	-0.0670267	0.0145057	3.82393e-06	0.0074597	0.0451737	0.868839
Meniscus derangement	Vascular dementia	rs3771517	T	C	-0.050517	0.0107232	2.46479e-06	-0.0317245	0.0338362	0.348456
Meniscus derangement	Vascular dementia	rs41274604	C	T	0.124001	0.0262455	2.30531e-06	-0.0533669	0.0858235	0.534059
Meniscus derangement	Vascular dementia	rs4547914	T	C	0.110365	0.0233321	2.24321e-06	-0.0329289	0.0718439	0.646709
Meniscus derangement	Vascular dementia	rs4811309	A	G	-0.049134	0.0102665	1.70247e-06	0.026621	0.0323959	0.411225
Meniscus derangement	Vascular dementia	rs4845298	C	T	-0.0488203	0.0104476	2.96982e-06	0.00181341	0.0330606	0.956257
Meniscus derangement	Vascular dementia	rs60078706	A	G	0.0484625	0.0103161	2.63039e-06	0.0348982	0.0326737	0.285483
Meniscus derangement	Vascular dementia	rs6994642	T	C	0.0736357	0.0156514	2.54208e-06	-0.073748	0.0502712	0.142375
Meniscus derangement	Vascular dementia	rs7722739	T	G	-0.100577	0.0184672	5.14434e-08	-0.0570369	0.057853	0.324186
Meniscus derangement	Vascular dementia	rs77899930	A	G	0.133744	0.0284753	2.6421e-06	-0.0407744	0.0942715	0.665364
Meniscus derangement	Vascular dementia	rs9321725	T	C	-0.0476841	0.0104211	4.74559e-06	-0.0133804	0.0329722	0.684882
Meniscus derangement	Vascular dementia	rs9726352	A	G	0.0600507	0.011255	9.52928e-08	0.0433075	0.0353064	0.219966
Meniscus derangement	Vascular dementia	rs9858826	G	A	-0.0545545	0.0116592	2.88138e-06	0.0262142	0.0367686	0.475877
Meniscus derangement	Vascular dementia	rs9883248	G	A	-0.046709	0.0102321	4.99597e-06	0.0480975	0.0324043	0.137731
Meniscus derangement	Frontotemporal dementia, wide, incl. Pick's disease	rs10406463	G	A	0.048611	0.0104836	3.53704e-06	0.0391747	0.134139	0.770252
Meniscus derangement	Frontotemporal dementia, wide, incl. Pick's disease	rs10736167	T	C	-0.077898	0.0162388	1.61027e-06	-0.424938	0.213351	0.0464002
Meniscus derangement	Frontotemporal dementia, wide, incl. Pick's disease	rs10861879	A	G	-0.0482811	0.0105671	4.90038e-06	-0.0902549	0.134662	0.502709
Meniscus derangement	Frontotemporal dementia, wide, incl. Pick's disease	rs114539878	C	T	-0.18337	0.036013	3.54748e-07	-0.246779	0.448471	0.582135
Meniscus derangement	Frontotemporal dementia, wide, incl. Pick's disease	rs117300515	G	A	0.550057	0.119862	4.45164e-06	0.771306	1.83905	0.67492
Meniscus derangement	Frontotemporal dementia, wide, incl. Pick's disease	rs118152212	T	C	0.218316	0.0413564	1.29972e-07	0.154008	0.553973	0.781007
Meniscus derangement	Frontotemporal dementia, wide, incl. Pick's disease	rs12407338	A	G	-0.0505998	0.0110187	4.38622e-06	0.0837372	0.139547	0.548463
Meniscus derangement	Frontotemporal dementia, wide, incl. Pick's disease	rs12645533	G	T	0.0908773	0.0192201	2.26485e-06	-0.20031	0.251612	0.42597
Meniscus derangement	Frontotemporal dementia, wide, incl. Pick's disease	rs1264622	T	C	0.0699711	0.0142088	8.45843e-07	-0.304594	0.186763	0.102909
Meniscus derangement	Frontotemporal dementia, wide, incl. Pick's disease	rs12830284	C	A	-0.0486263	0.0102573	2.13054e-06	0.0165289	0.131039	0.899623
Meniscus derangement	Frontotemporal dementia, wide, incl. Pick's disease	rs13076741	C	T	0.0508766	0.0105155	1.31e-06	0.159504	0.133672	0.232772
Meniscus derangement	Frontotemporal dementia, wide, incl. Pick's disease	rs1359070	C	T	0.0607553	0.0129297	2.61571e-06	0.136067	0.166874	0.414849
Meniscus derangement	Frontotemporal dementia, wide, incl. Pick's disease	rs137939848	C	G	0.0854479	0.0177406	1.46083e-06	0.00948018	0.227936	0.966824
Meniscus derangement	Frontotemporal dementia, wide, incl. Pick's disease	rs1393972	A	C	-0.0514291	0.0111811	4.23224e-06	0.0388905	0.142114	0.784348
Meniscus derangement	Frontotemporal dementia, wide, incl. Pick's disease	rs143299874	G	C	0.153431	0.033451	4.50236e-06	0.223254	0.458904	0.626617
Meniscus derangement	Frontotemporal dementia, wide, incl. Pick's disease	rs143383	A	G	0.080643	0.010425	1.02967e-14	-0.0738541	0.132196	0.576387
Meniscus derangement	Frontotemporal dementia, wide, incl. Pick's disease	rs143847405	A	G	-0.112256	0.024461	4.44979e-06	0.140564	0.316463	0.656918
Meniscus derangement	Frontotemporal dementia, wide, incl. Pick's disease	rs148320793	A	G	0.317919	0.0639123	6.54847e-07	-0.185442	0.914078	0.839234
Meniscus derangement	Frontotemporal dementia, wide, incl. Pick's disease	rs171937	C	T	-0.0531865	0.0107122	6.86815e-07	-0.0434831	0.135347	0.748004
Meniscus derangement	Frontotemporal dementia, wide, incl. Pick's disease	rs2171126	T	C	0.0480187	0.0102085	2.55358e-06	-0.0313099	0.130237	0.810015
Meniscus derangement	Frontotemporal dementia, wide, incl. Pick's disease	rs2350205	G	T	0.0520383	0.0103876	5.45343e-07	-0.137563	0.132867	0.300509
Meniscus derangement	Frontotemporal dementia, wide, incl. Pick's disease	rs255575	C	T	0.0486458	0.0102639	2.14264e-06	0.0942553	0.130821	0.471222
Meniscus derangement	Frontotemporal dementia, wide, incl. Pick's disease	rs270397	A	G	-0.0554177	0.0102194	5.8684e-08	0.0296459	0.130508	0.820301
Meniscus derangement	Frontotemporal dementia, wide, incl. Pick's disease	rs2720588	C	A	0.0561224	0.01117	5.0501e-07	0.20617	0.142821	0.148863
Meniscus derangement	Frontotemporal dementia, wide, incl. Pick's disease	rs2732227	A	G	-0.0530137	0.0113277	2.8686e-06	0.106187	0.143902	0.46057
Meniscus derangement	Frontotemporal dementia, wide, incl. Pick's disease	rs2820449	A	G	0.0484737	0.0106175	4.9846e-06	0.191939	0.135614	0.156969
Meniscus derangement	Frontotemporal dementia, wide, incl. Pick's disease	rs2832231	C	T	0.049113	0.0106581	4.06481e-06	0.0804425	0.136857	0.556675
Meniscus derangement	Frontotemporal dementia, wide, incl. Pick's disease	rs28581519	A	G	-0.0704484	0.0140921	5.75838e-07	-0.294727	0.176603	0.0951437
Meniscus derangement	Frontotemporal dementia, wide, incl. Pick's disease	rs3118905	A	G	-0.0600597	0.0111106	6.45907e-08	-0.102812	0.140084	0.462991
Meniscus derangement	Frontotemporal dementia, wide, incl. Pick's disease	rs333453	A	T	-0.0574688	0.011425	4.90241e-07	0.178794	0.144187	0.214971
Meniscus derangement	Frontotemporal dementia, wide, incl. Pick's disease	rs34049648	A	G	0.0497289	0.0103052	1.39566e-06	-0.0990351	0.131664	0.451943
Meniscus derangement	Frontotemporal dementia, wide, incl. Pick's disease	rs35316639	A	G	0.0483776	0.0104838	3.94022e-06	0.00400718	0.133452	0.976045
Meniscus derangement	Frontotemporal dementia, wide, incl. Pick's disease	rs35958750	T	C	-0.0670267	0.0145057	3.82393e-06	0.142092	0.182078	0.435161
Meniscus derangement	Frontotemporal dementia, wide, incl. Pick's disease	rs3771517	T	C	-0.050517	0.0107232	2.46479e-06	-0.157491	0.136971	0.25022
Meniscus derangement	Frontotemporal dementia, wide, incl. Pick's disease	rs41274604	C	T	0.124001	0.0262455	2.30531e-06	0.146574	0.348084	0.67369
Meniscus derangement	Frontotemporal dementia, wide, incl. Pick's disease	rs4547914	T	C	0.110365	0.0233321	2.24321e-06	0.384302	0.290866	0.186424
Meniscus derangement	Frontotemporal dementia, wide, incl. Pick's disease	rs4811309	A	G	-0.049134	0.0102665	1.70247e-06	-0.0336963	0.130811	0.796719
Meniscus derangement	Frontotemporal dementia, wide, incl. Pick's disease	rs4845298	C	T	-0.0488203	0.0104476	2.96982e-06	-0.0736019	0.132806	0.579438
Meniscus derangement	Frontotemporal dementia, wide, incl. Pick's disease	rs60078706	A	G	0.0484625	0.0103161	2.63039e-06	0.051443	0.131981	0.696702
Meniscus derangement	Frontotemporal dementia, wide, incl. Pick's disease	rs6994642	T	C	0.0736357	0.0156514	2.54208e-06	0.351676	0.199024	0.0772289
Meniscus derangement	Frontotemporal dementia, wide, incl. Pick's disease	rs7722739	T	G	-0.100577	0.0184672	5.14434e-08	0.484574	0.223437	0.030103
Meniscus derangement	Frontotemporal dementia, wide, incl. Pick's disease	rs77899930	A	G	0.133744	0.0284753	2.6421e-06	-0.119684	0.364458	0.742617
Meniscus derangement	Frontotemporal dementia, wide, incl. Pick's disease	rs9321725	T	C	-0.0476841	0.0104211	4.74559e-06	0.16028	0.132584	0.226704
Meniscus derangement	Frontotemporal dementia, wide, incl. Pick's disease	rs9726352	A	G	0.0600507	0.011255	9.52928e-08	0.289453	0.142057	0.0415911
Meniscus derangement	Frontotemporal dementia, wide, incl. Pick's disease	rs9858826	G	A	-0.0545545	0.0116592	2.88138e-06	-0.207879	0.148808	0.162427
Meniscus derangement	Frontotemporal dementia, wide, incl. Pick's disease	rs9883248	G	A	-0.046709	0.0102321	4.99597e-06	0.0376967	0.130583	0.772826
Sciatica	Dementia with Lewy bodies	rs113513521	T	G	0.693459	0.142065	1.05407e-06	-0.0734065	0.146254	0.615734
Sciatica	Dementia with Lewy bodies	rs1397677	T	C	-0.217915	0.0430405	4.12662e-07	-0.0517239	0.0422105	0.220436
Sciatica	Dementia with Lewy bodies	rs187042712	C	T	0.591289	0.121549	1.14679e-06	0.0662184	0.111586	0.552913
Sciatica	Dementia with Lewy bodies	rs2072780	T	C	0.207671	0.0452779	4.50552e-06	-0.0194081	0.0452121	0.667732
Sciatica	Dementia with Lewy bodies	rs33196	G	C	0.331464	0.0696715	1.95976e-06	0.0432223	0.0673858	0.521296
Sciatica	Dementia with Lewy bodies	rs3760711	T	C	0.636667	0.125735	4.11519e-07	0.0352899	0.117902	0.764705
Sciatica	Dementia with Lewy bodies	rs72817029	T	C	0.47895	0.102013	2.66614e-06	0.217182	0.109464	0.047252
Sciatica	Dementia in Alzheimer disease	rs113513521	T	G	0.693459	0.142065	1.05407e-06	0.0968083	0.0582514	0.0965317
Sciatica	Dementia in Alzheimer disease	rs1397677	T	C	-0.217915	0.0430405	4.12662e-07	0.0132897	0.0244463	0.586697
Sciatica	Dementia in Alzheimer disease	rs187042712	C	T	0.591289	0.121549	1.14679e-06	-0.186999	0.0940259	0.046724
Sciatica	Dementia in Alzheimer disease	rs187792408	A	C	1.13692	0.245084	3.50316e-06	0.145034	0.122815	0.237638
Sciatica	Dementia in Alzheimer disease	rs2072780	T	C	0.207671	0.0452779	4.50552e-06	-0.0408753	0.030601	0.18163
Sciatica	Dementia in Alzheimer disease	rs33196	G	C	0.331464	0.0696715	1.95976e-06	0.0200048	0.0329516	0.543787
Sciatica	Dementia in Alzheimer disease	rs3760711	T	C	0.636667	0.125735	4.11519e-07	-0.12782	0.10717	0.232991
Sciatica	Dementia in Alzheimer disease	rs72817029	T	C	0.47895	0.102013	2.66614e-06	0.0340342	0.0897104	0.704408
Sciatica	Dementia	rs113513521	T	G	0.693459	0.142065	1.05407e-06	0.0628651	0.0349078	0.07172
Sciatica	Dementia	rs1397677	T	C	-0.217915	0.0430405	4.12662e-07	0.0225897	0.0146411	0.122854
Sciatica	Dementia	rs187042712	C	T	0.591289	0.121549	1.14679e-06	-0.157233	0.0595843	0.00831936
Sciatica	Dementia	rs187792408	A	C	1.13692	0.245084	3.50316e-06	0.0116478	0.0737034	0.874429
Sciatica	Dementia	rs2072780	T	C	0.207671	0.0452779	4.50552e-06	-0.00866068	0.0182897	0.635836
Sciatica	Dementia	rs33196	G	C	0.331464	0.0696715	1.95976e-06	0.0180594	0.0197817	0.361278
Sciatica	Dementia	rs3760711	T	C	0.636667	0.125735	4.11519e-07	0.0456273	0.0630309	0.469135
Sciatica	Dementia	rs72817029	T	C	0.47895	0.102013	2.66614e-06	0.0386365	0.0536061	0.471064
Sciatica	Unspecified dementia	rs113513521	T	G	0.693459	0.142065	1.05407e-06	-0.00522275	0.0676096	0.938426
Sciatica	Unspecified dementia	rs1397677	T	C	-0.217915	0.0430405	4.12662e-07	0.0559647	0.0280475	0.0460045
Sciatica	Unspecified dementia	rs187042712	C	T	0.591289	0.121549	1.14679e-06	-0.246831	0.104749	0.0184527
Sciatica	Unspecified dementia	rs187792408	A	C	1.13692	0.245084	3.50316e-06	0.197555	0.143286	0.167972
Sciatica	Unspecified dementia	rs2072780	T	C	0.207671	0.0452779	4.50552e-06	-0.023817	0.0347591	0.493217
Sciatica	Unspecified dementia	rs33196	G	C	0.331464	0.0696715	1.95976e-06	-0.00464101	0.0379921	0.902775
Sciatica	Unspecified dementia	rs3760711	T	C	0.636667	0.125735	4.11519e-07	-0.0106913	0.117391	0.927434
Sciatica	Unspecified dementia	rs72817029	T	C	0.47895	0.102013	2.66614e-06	0.135635	0.100439	0.176883
Sciatica	Vascular dementia	rs113513521	T	G	0.693459	0.142065	1.05407e-06	0.0189138	0.0836493	0.821117
Sciatica	Vascular dementia	rs1397677	T	C	-0.217915	0.0430405	4.12662e-07	-0.0049126	0.0346884	0.88738
Sciatica	Vascular dementia	rs187042712	C	T	0.591289	0.121549	1.14679e-06	-0.2839	0.132711	0.0324168
Sciatica	Vascular dementia	rs187792408	A	C	1.13692	0.245084	3.50316e-06	-0.0956926	0.17931	0.59357
Sciatica	Vascular dementia	rs2072780	T	C	0.207671	0.0452779	4.50552e-06	-0.0702848	0.0430146	0.102264
Sciatica	Vascular dementia	rs33196	G	C	0.331464	0.0696715	1.95976e-06	0.0175558	0.0469828	0.708654
Sciatica	Vascular dementia	rs3760711	T	C	0.636667	0.125735	4.11519e-07	-0.090999	0.146316	0.533986
Sciatica	Vascular dementia	rs72817029	T	C	0.47895	0.102013	2.66614e-06	0.188403	0.124638	0.130636
Sciatica	Frontotemporal dementia, wide, incl. Pick's disease	rs113513521	T	G	0.693459	0.142065	1.05407e-06	-0.479286	0.342733	0.161986
Sciatica	Frontotemporal dementia, wide, incl. Pick's disease	rs1397677	T	C	-0.217915	0.0430405	4.12662e-07	0.128494	0.140021	0.358789
Sciatica	Frontotemporal dementia, wide, incl. Pick's disease	rs187042712	C	T	0.591289	0.121549	1.14679e-06	0.401484	0.598868	0.502599
Sciatica	Frontotemporal dementia, wide, incl. Pick's disease	rs187792408	A	C	1.13692	0.245084	3.50316e-06	-0.211105	0.643536	0.742882
Sciatica	Frontotemporal dementia, wide, incl. Pick's disease	rs2072780	T	C	0.207671	0.0452779	4.50552e-06	0.366549	0.177034	0.0384052
Sciatica	Frontotemporal dementia, wide, incl. Pick's disease	rs33196	G	C	0.331464	0.0696715	1.95976e-06	-0.0274182	0.188651	0.884444
Sciatica	Frontotemporal dementia, wide, incl. Pick's disease	rs3760711	T	C	0.636667	0.125735	4.11519e-07	-1.02159	0.632788	0.106435
Sciatica	Frontotemporal dementia, wide, incl. Pick's disease	rs72817029	T	C	0.47895	0.102013	2.66614e-06	0.379986	0.532812	0.475739
Lateral epicondylitis	Dementia with Lewy bodies	rs11154109	A	G	0.110944	0.0231898	1.717e-06	-0.0337635	0.037081	0.36256
Lateral epicondylitis	Dementia with Lewy bodies	rs11888649	C	T	-0.218939	0.0464353	2.41808e-06	0.0515673	0.0536361	0.33633
Lateral epicondylitis	Dementia with Lewy bodies	rs139651344	A	G	0.632951	0.136878	3.76062e-06	-0.0114169	0.119399	0.923825
Lateral epicondylitis	Dementia with Lewy bodies	rs17810787	T	G	0.156153	0.0320525	1.10586e-06	-0.0255065	0.0514573	0.620113
Lateral epicondylitis	Dementia with Lewy bodies	rs6482191	G	T	-0.121409	0.0246067	8.05601e-07	0.0555021	0.0399254	0.164485
Lateral epicondylitis	Dementia with Lewy bodies	rs7243825	G	A	-0.130951	0.0246572	1.09114e-07	-0.0551698	0.0371022	0.137001
Lateral epicondylitis	Dementia with Lewy bodies	rs79140820	C	T	0.235436	0.0493814	1.86325e-06	-0.0488741	0.0819508	0.550917
Lateral epicondylitis	Dementia with Lewy bodies	rs8042593	A	G	-0.112646	0.0239143	2.47212e-06	0.0574448	0.0389181	0.13993
Lateral epicondylitis	Dementia in Alzheimer disease	rs11154109	A	G	0.110944	0.0231898	1.717e-06	0.0241892	0.0227485	0.287631
Lateral epicondylitis	Dementia in Alzheimer disease	rs11888649	C	T	-0.218939	0.0464353	2.41808e-06	0.0555515	0.0423116	0.189212
Lateral epicondylitis	Dementia in Alzheimer disease	rs12985868	C	T	-0.117479	0.0248226	2.21503e-06	0.0469497	0.0242905	0.053255
Lateral epicondylitis	Dementia in Alzheimer disease	rs139651344	A	G	0.632951	0.136878	3.76062e-06	0.083032	0.166964	0.618975
Lateral epicondylitis	Dementia in Alzheimer disease	rs17810787	T	G	0.156153	0.0320525	1.10586e-06	-0.0490863	0.0327322	0.133709
Lateral epicondylitis	Dementia in Alzheimer disease	rs60238138	A	C	0.526434	0.109497	1.52644e-06	0.104185	0.126777	0.411195
Lateral epicondylitis	Dementia in Alzheimer disease	rs6482191	G	T	-0.121409	0.0246067	8.05601e-07	-0.0251319	0.0244884	0.304759
Lateral epicondylitis	Dementia in Alzheimer disease	rs7243825	G	A	-0.130951	0.0246572	1.09114e-07	0.00640305	0.024499	0.793814
Lateral epicondylitis	Dementia in Alzheimer disease	rs79140820	C	T	0.235436	0.0493814	1.86325e-06	0.0615549	0.052008	0.236585
Lateral epicondylitis	Dementia in Alzheimer disease	rs8042593	A	G	-0.112646	0.0239143	2.47212e-06	0.0295399	0.0236542	0.21173
Lateral epicondylitis	Dementia	rs11154109	A	G	0.110944	0.0231898	1.717e-06	0.0187802	0.0136192	0.16791
Lateral epicondylitis	Dementia	rs11888649	C	T	-0.218939	0.0464353	2.41808e-06	0.008685	0.0254797	0.733209
Lateral epicondylitis	Dementia	rs12985868	C	T	-0.117479	0.0248226	2.21503e-06	0.0120045	0.0144792	0.407057
Lateral epicondylitis	Dementia	rs139651344	A	G	0.632951	0.136878	3.76062e-06	-0.00751026	0.0952896	0.93718
Lateral epicondylitis	Dementia	rs17810787	T	G	0.156153	0.0320525	1.10586e-06	-0.0259921	0.0195917	0.184611
Lateral epicondylitis	Dementia	rs60238138	A	C	0.526434	0.109497	1.52644e-06	0.205934	0.0718013	0.00412933
Lateral epicondylitis	Dementia	rs6482191	G	T	-0.121409	0.0246067	8.05601e-07	0.0190061	0.014693	0.195822
Lateral epicondylitis	Dementia	rs7243825	G	A	-0.130951	0.0246572	1.09114e-07	0.00246538	0.0146699	0.866538
Lateral epicondylitis	Dementia	rs79140820	C	T	0.235436	0.0493814	1.86325e-06	0.00339987	0.0312605	0.913393
Lateral epicondylitis	Dementia	rs8042593	A	G	-0.112646	0.0239143	2.47212e-06	0.0163935	0.0141768	0.247534
Lateral epicondylitis	Unspecified dementia	rs11154109	A	G	0.110944	0.0231898	1.717e-06	0.012778	0.0260407	0.623643
Lateral epicondylitis	Unspecified dementia	rs11888649	C	T	-0.218939	0.0464353	2.41808e-06	-0.0370857	0.0484858	0.444346
Lateral epicondylitis	Unspecified dementia	rs12985868	C	T	-0.117479	0.0248226	2.21503e-06	0.000951081	0.0279942	0.972898
Lateral epicondylitis	Unspecified dementia	rs139651344	A	G	0.632951	0.136878	3.76062e-06	-0.0178736	0.172379	0.917417
Lateral epicondylitis	Unspecified dementia	rs17810787	T	G	0.156153	0.0320525	1.10586e-06	-0.0631903	0.0374722	0.0917339
Lateral epicondylitis	Unspecified dementia	rs60238138	A	C	0.526434	0.109497	1.52644e-06	0.192227	0.143765	0.18119
Lateral epicondylitis	Unspecified dementia	rs6482191	G	T	-0.121409	0.0246067	8.05601e-07	0.0788146	0.0284358	0.00557699
Lateral epicondylitis	Unspecified dementia	rs7243825	G	A	-0.130951	0.0246572	1.09114e-07	0.00793681	0.0279912	0.776758
Lateral epicondylitis	Unspecified dementia	rs79140820	C	T	0.235436	0.0493814	1.86325e-06	0.0195415	0.0593807	0.742089
Lateral epicondylitis	Unspecified dementia	rs8042593	A	G	-0.112646	0.0239143	2.47212e-06	0.0179106	0.0271679	0.509731
Lateral epicondylitis	Vascular dementia	rs11154109	A	G	0.110944	0.0231898	1.717e-06	-0.0044178	0.032184	0.89082
Lateral epicondylitis	Vascular dementia	rs11888649	C	T	-0.218939	0.0464353	2.41808e-06	0.0774736	0.0602128	0.198211
Lateral epicondylitis	Vascular dementia	rs12985868	C	T	-0.117479	0.0248226	2.21503e-06	-0.0284585	0.0345124	0.409606
Lateral epicondylitis	Vascular dementia	rs139651344	A	G	0.632951	0.136878	3.76062e-06	-0.0824561	0.229237	0.719073
Lateral epicondylitis	Vascular dementia	rs17810787	T	G	0.156153	0.0320525	1.10586e-06	-0.131391	0.0475935	0.00576806
Lateral epicondylitis	Vascular dementia	rs60238138	A	C	0.526434	0.109497	1.52644e-06	0.306595	0.175471	0.0805898
Lateral epicondylitis	Vascular dementia	rs6482191	G	T	-0.121409	0.0246067	8.05601e-07	0.0536107	0.0348563	0.124036
Lateral epicondylitis	Vascular dementia	rs7243825	G	A	-0.130951	0.0246572	1.09114e-07	0.0206577	0.034739	0.552074
Lateral epicondylitis	Vascular dementia	rs79140820	C	T	0.235436	0.0493814	1.86325e-06	-0.00738038	0.0734728	0.919987
Lateral epicondylitis	Vascular dementia	rs8042593	A	G	-0.112646	0.0239143	2.47212e-06	-0.00470276	0.0336552	0.88887
Lateral epicondylitis	Frontotemporal dementia, wide, incl. Pick's disease	rs11154109	A	G	0.110944	0.0231898	1.717e-06	-0.0385506	0.130538	0.767749
Lateral epicondylitis	Frontotemporal dementia, wide, incl. Pick's disease	rs11888649	C	T	-0.218939	0.0464353	2.41808e-06	0.368844	0.244958	0.132134
Lateral epicondylitis	Frontotemporal dementia, wide, incl. Pick's disease	rs12985868	C	T	-0.117479	0.0248226	2.21503e-06	-0.0271727	0.138321	0.844261
Lateral epicondylitis	Frontotemporal dementia, wide, incl. Pick's disease	rs139651344	A	G	0.632951	0.136878	3.76062e-06	-0.184933	0.962193	0.847586
Lateral epicondylitis	Frontotemporal dementia, wide, incl. Pick's disease	rs17810787	T	G	0.156153	0.0320525	1.10586e-06	0.263662	0.187456	0.159566
Lateral epicondylitis	Frontotemporal dementia, wide, incl. Pick's disease	rs60238138	A	C	0.526434	0.109497	1.52644e-06	0.145714	0.761047	0.848161
Lateral epicondylitis	Frontotemporal dementia, wide, incl. Pick's disease	rs6482191	G	T	-0.121409	0.0246067	8.05601e-07	0.0500603	0.139845	0.720366
Lateral epicondylitis	Frontotemporal dementia, wide, incl. Pick's disease	rs7243825	G	A	-0.130951	0.0246572	1.09114e-07	0.0219092	0.1406	0.87617
Lateral epicondylitis	Frontotemporal dementia, wide, incl. Pick's disease	rs79140820	C	T	0.235436	0.0493814	1.86325e-06	0.409607	0.312824	0.190405
Lateral epicondylitis	Frontotemporal dementia, wide, incl. Pick's disease	rs8042593	A	G	-0.112646	0.0239143	2.47212e-06	0.271737	0.135883	0.0455229
Cervical disc disorders	Dementia with Lewy bodies	rs13031261	T	C	0.0732643	0.0133802	4.36114e-08	-0.0120473	0.0373327	0.746915
Cervical disc disorders	Dementia with Lewy bodies	rs1993936	A	G	-0.0942312	0.0159468	3.44001e-09	-0.0115312	0.0415758	0.781516
Cervical disc disorders	Dementia with Lewy bodies	rs2761882	T	C	-0.0735982	0.0134174	4.12857e-08	0.0560678	0.0368671	0.128304
Cervical disc disorders	Dementia with Lewy bodies	rs7816342	A	G	-0.100542	0.0174279	7.9726e-09	-0.00833968	0.0439396	0.849476
Cervical disc disorders	Dementia in Alzheimer disease	rs13031261	T	C	0.0732643	0.0133802	4.36114e-08	-0.0242432	0.0228847	0.289433
Cervical disc disorders	Dementia in Alzheimer disease	rs1993936	A	G	-0.0942312	0.0159468	3.44001e-09	-0.0154156	0.026801	0.565165
Cervical disc disorders	Dementia in Alzheimer disease	rs2761882	T	C	-0.0735982	0.0134174	4.12857e-08	-0.00302401	0.0229098	0.894987
Cervical disc disorders	Dementia in Alzheimer disease	rs7816342	A	G	-0.100542	0.0174279	7.9726e-09	-0.0149813	0.0291706	0.607549
Cervical disc disorders	Dementia	rs13031261	T	C	0.0732643	0.0133802	4.36114e-08	-0.0216743	0.0136976	0.113572
Cervical disc disorders	Dementia	rs1993936	A	G	-0.0942312	0.0159468	3.44001e-09	-0.000494636	0.0160105	0.975354
Cervical disc disorders	Dementia	rs2761882	T	C	-0.0735982	0.0134174	4.12857e-08	-0.00019882	0.0137197	0.988438
Cervical disc disorders	Dementia	rs7816342	A	G	-0.100542	0.0174279	7.9726e-09	0.0020084	0.0174082	0.908151
Cervical disc disorders	Unspecified dementia	rs13031261	T	C	0.0732643	0.0133802	4.36114e-08	-0.0404812	0.0262846	0.123534
Cervical disc disorders	Unspecified dementia	rs1993936	A	G	-0.0942312	0.0159468	3.44001e-09	0.0365946	0.030515	0.230436
Cervical disc disorders	Unspecified dementia	rs2761882	T	C	-0.0735982	0.0134174	4.12857e-08	-0.032567	0.0262892	0.21542
Cervical disc disorders	Unspecified dementia	rs7816342	A	G	-0.100542	0.0174279	7.9726e-09	-0.0388675	0.033183	0.241475
Cervical disc disorders	Vascular dementia	rs13031261	T	C	0.0732643	0.0133802	4.36114e-08	-0.0485666	0.0325385	0.135545
Cervical disc disorders	Vascular dementia	rs1993936	A	G	-0.0942312	0.0159468	3.44001e-09	-0.0259574	0.0378012	0.492283
Cervical disc disorders	Vascular dementia	rs2761882	T	C	-0.0735982	0.0134174	4.12857e-08	0.0351927	0.0324656	0.278365
Cervical disc disorders	Vascular dementia	rs7816342	A	G	-0.100542	0.0174279	7.9726e-09	-0.0128852	0.0410906	0.75384
Cervical disc disorders	Frontotemporal dementia, wide, incl. Pick's disease	rs13031261	T	C	0.0732643	0.0133802	4.36114e-08	0.145601	0.131405	0.267848
Cervical disc disorders	Frontotemporal dementia, wide, incl. Pick's disease	rs1993936	A	G	-0.0942312	0.0159468	3.44001e-09	-0.268075	0.15416	0.0820465
Cervical disc disorders	Frontotemporal dementia, wide, incl. Pick's disease	rs2761882	T	C	-0.0735982	0.0134174	4.12857e-08	-0.160066	0.130944	0.221554
Cervical disc disorders	Frontotemporal dementia, wide, incl. Pick's disease	rs7816342	A	G	-0.100542	0.0174279	7.9726e-09	0.228993	0.16807	0.173044
Muscle wasting and atrophy	Dementia with Lewy bodies	rs11028189	T	C	0.588517	0.12849	4.6444e-06	-0.0613022	0.0450725	0.173801
Muscle wasting and atrophy	Dementia with Lewy bodies	rs67994022	A	G	0.624162	0.1374	5.55495e-06	-0.0450947	0.0521547	0.38724
Muscle wasting and atrophy	Dementia in Alzheimer disease	rs11028189	T	C	0.588517	0.12849	4.6444e-06	-0.0310048	0.0303361	0.306761
Muscle wasting and atrophy	Dementia in Alzheimer disease	rs149812776	T	A	0.852914	0.189152	6.50879e-06	0.0486799	0.0504613	0.334697
Muscle wasting and atrophy	Dementia in Alzheimer disease	rs67994022	A	G	0.624162	0.1374	5.55495e-06	0.0344861	0.0333509	0.301118
Muscle wasting and atrophy	Dementia in Alzheimer disease	rs79595506	T	C	1.88637	0.424177	8.70302e-06	0.0463348	0.162465	0.775491
Muscle wasting and atrophy	Dementia	rs11028189	T	C	0.588517	0.12849	4.6444e-06	-0.00431422	0.0181821	0.81244
Muscle wasting and atrophy	Dementia	rs149812776	T	A	0.852914	0.189152	6.50879e-06	0.037761	0.0302851	0.212453
Muscle wasting and atrophy	Dementia	rs67994022	A	G	0.624162	0.1374	5.55495e-06	0.0255458	0.0199051	0.199358
Muscle wasting and atrophy	Dementia	rs79595506	T	C	1.88637	0.424177	8.70302e-06	-0.102196	0.0978175	0.29613
Muscle wasting and atrophy	Unspecified dementia	rs11028189	T	C	0.588517	0.12849	4.6444e-06	-0.0136726	0.0346758	0.693362
Muscle wasting and atrophy	Unspecified dementia	rs149812776	T	A	0.852914	0.189152	6.50879e-06	0.0208516	0.058732	0.722568
Muscle wasting and atrophy	Unspecified dementia	rs67994022	A	G	0.624162	0.1374	5.55495e-06	0.0357106	0.0382698	0.350753
Muscle wasting and atrophy	Unspecified dementia	rs79595506	T	C	1.88637	0.424177	8.70302e-06	-0.135523	0.185852	0.46588
Muscle wasting and atrophy	Vascular dementia	rs11028189	T	C	0.588517	0.12849	4.6444e-06	-0.00988759	0.043042	0.81831
Muscle wasting and atrophy	Vascular dementia	rs149812776	T	A	0.852914	0.189152	6.50879e-06	-0.0877654	0.0722834	0.224677
Muscle wasting and atrophy	Vascular dementia	rs67994022	A	G	0.624162	0.1374	5.55495e-06	-0.00355016	0.0472204	0.940069
Muscle wasting and atrophy	Vascular dementia	rs79595506	T	C	1.88637	0.424177	8.70302e-06	-0.38924	0.222939	0.0808202
Muscle wasting and atrophy	Frontotemporal dementia, wide, incl. Pick's disease	rs11028189	T	C	0.588517	0.12849	4.6444e-06	0.352241	0.17531	0.0445102
Muscle wasting and atrophy	Frontotemporal dementia, wide, incl. Pick's disease	rs149812776	T	A	0.852914	0.189152	6.50879e-06	-0.0430646	0.288612	0.881386
Muscle wasting and atrophy	Frontotemporal dementia, wide, incl. Pick's disease	rs67994022	A	G	0.624162	0.1374	5.55495e-06	-0.165356	0.19158	0.388073
Muscle wasting and atrophy	Frontotemporal dementia, wide, incl. Pick's disease	rs79595506	T	C	1.88637	0.424177	8.70302e-06	-1.01061	0.984538	0.304666
Usual walking pace	Dementia with Lewy bodies	rs10862220	G	T	0.00840767	0.00135051	4.79999e-10	0.00817835	0.0395079	0.836014
Usual walking pace	Dementia with Lewy bodies	rs10883618	A	G	0.0078103	0.00130834	2.39999e-09	0.0126003	0.0377147	0.738382
Usual walking pace	Dementia with Lewy bodies	rs11150623	T	G	-0.00968813	0.0013224	2.39994e-13	-0.00518653	0.0381623	0.891848
Usual walking pace	Dementia with Lewy bodies	rs11732213	C	T	0.0091614	0.00159593	9.40005e-09	-0.00634106	0.0456627	0.889558
Usual walking pace	Dementia with Lewy bodies	rs11848096	C	T	-0.00750831	0.00130696	9.20005e-09	-0.015136	0.0379648	0.690135
Usual walking pace	Dementia with Lewy bodies	rs12042959	G	A	0.0125663	0.00181269	4.10015e-12	-0.0167424	0.0519522	0.747257
Usual walking pace	Dementia with Lewy bodies	rs12461902	A	G	-0.00801134	0.00135739	3.59998e-09	0.0151053	0.0398703	0.704769
Usual walking pace	Dementia with Lewy bodies	rs139398785	G	C	-0.00999513	0.00182329	4.20001e-08	0.0159127	0.056899	0.779672
Usual walking pace	Dementia with Lewy bodies	rs144333966	G	A	0.0304614	0.00544615	2.19999e-08	0.0390188	0.153671	0.799562
Usual walking pace	Dementia with Lewy bodies	rs2297600	G	T	-0.0115607	0.00168167	6.20012e-12	0.0260965	0.0495619	0.59857
Usual walking pace	Dementia with Lewy bodies	rs2602731	G	A	-0.00766675	0.00136907	2.1e-08	0.0114452	0.0395698	0.772401
Usual walking pace	Dementia with Lewy bodies	rs273512	T	C	-0.00966507	0.00129058	6.89922e-14	0.0313824	0.0373388	0.400647
Usual walking pace	Dementia with Lewy bodies	rs4516268	A	C	0.00983008	0.00160664	9.49992e-10	0.0260965	0.0483839	0.589639
Usual walking pace	Dementia with Lewy bodies	rs4643373	C	T	0.0077266	0.00138223	2.30001e-08	0.0110982	0.0404927	0.784022
Usual walking pace	Dementia with Lewy bodies	rs4839898	A	G	0.0130564	0.00206037	2.30001e-10	-0.031501	0.0629598	0.616834
Usual walking pace	Dementia with Lewy bodies	rs55680124	T	C	-0.010742	0.00174984	8.30004e-10	0.0223777	0.0524517	0.669633
Usual walking pace	Dementia with Lewy bodies	rs613872	T	G	-0.0147074	0.00167052	1.29987e-18	-0.00591249	0.0485452	0.90303
Usual walking pace	Dementia with Lewy bodies	rs62048402	A	G	-0.00987537	0.00129011	1.9002e-14	0.0217028	0.0376086	0.563904
Usual walking pace	Dementia with Lewy bodies	rs830627	A	G	0.00742054	0.00128505	7.69999e-09	0.000309952	0.0374456	0.993363
Usual walking pace	Dementia in Alzheimer disease	rs10828258	G	A	-0.00932641	0.00135882	6.70039e-12	0.0118349	0.024392	0.627538
Usual walking pace	Dementia in Alzheimer disease	rs10862220	G	T	0.00840767	0.00135051	4.79999e-10	-0.00532141	0.0229011	0.816255
Usual walking pace	Dementia in Alzheimer disease	rs10883618	A	G	0.0078103	0.00130834	2.39999e-09	-0.0350871	0.0238159	0.140681
Usual walking pace	Dementia in Alzheimer disease	rs11039324	A	G	-0.0102105	0.00128765	2.19989e-15	-0.0539712	0.0233093	0.0205892
Usual walking pace	Dementia in Alzheimer disease	rs11077815	C	T	-0.00713336	0.00130691	4.79999e-08	0.045422	0.0244943	0.0636825
Usual walking pace	Dementia in Alzheimer disease	rs11150623	T	G	-0.00968813	0.0013224	2.39994e-13	-0.0161176	0.0229714	0.482903
Usual walking pace	Dementia in Alzheimer disease	rs11152989	T	C	-0.00751226	0.00136699	3.89996e-08	0.00824995	0.0247096	0.738472
Usual walking pace	Dementia in Alzheimer disease	rs113825410	G	A	-0.00881182	0.00151778	6.4e-09	-0.0042812	0.0279425	0.878229
Usual walking pace	Dementia in Alzheimer disease	rs11548200	C	T	-0.016041	0.00255177	3.29997e-10	-0.0541801	0.0584104	0.353627
Usual walking pace	Dementia in Alzheimer disease	rs11682482	G	T	0.00801894	0.00135595	3.29997e-09	-0.00310565	0.0239603	0.89687
Usual walking pace	Dementia in Alzheimer disease	rs11732213	C	T	0.0091614	0.00159593	9.40005e-09	-0.00125946	0.0276954	0.963728
Usual walking pace	Dementia in Alzheimer disease	rs11761141	G	T	-0.00789936	0.00135132	5e-09	0.0261316	0.0241325	0.278879
Usual walking pace	Dementia in Alzheimer disease	rs11848096	C	T	-0.00750831	0.00130696	9.20005e-09	0.0145719	0.0231817	0.529616
Usual walking pace	Dementia in Alzheimer disease	rs12042959	G	A	0.0125663	0.00181269	4.10015e-12	0.0082575	0.0312848	0.791821
Usual walking pace	Dementia in Alzheimer disease	rs12461902	A	G	-0.00801134	0.00135739	3.59998e-09	0.0324636	0.0241234	0.178389
Usual walking pace	Dementia in Alzheimer disease	rs12747822	A	T	0.0117683	0.00213998	3.79997e-08	0.0605455	0.0527942	0.251456
Usual walking pace	Dementia in Alzheimer disease	rs144333966	G	A	0.0304614	0.00544615	2.19999e-08	0.0392873	0.0660828	0.552168
Usual walking pace	Dementia in Alzheimer disease	rs1592	C	A	0.0074513	0.00128817	7.29995e-09	0.0238416	0.0229445	0.29876
Usual walking pace	Dementia in Alzheimer disease	rs2037735	T	C	-0.0112677	0.00194308	6.69993e-09	0.0235525	0.0323489	0.466567
Usual walking pace	Dementia in Alzheimer disease	rs205262	G	A	-0.00870949	0.00142654	1e-09	0.00749343	0.0255487	0.769293
Usual walking pace	Dementia in Alzheimer disease	rs2170670	A	G	-0.00708769	0.0012972	4.70002e-08	-0.0183581	0.0237714	0.439951
Usual walking pace	Dementia in Alzheimer disease	rs2297600	G	T	-0.0115607	0.00168167	6.20012e-12	0.0088587	0.0276614	0.748774
Usual walking pace	Dementia in Alzheimer disease	rs2439823	G	A	-0.0072789	0.00127453	1.09999e-08	0.047552	0.0228666	0.0375673
Usual walking pace	Dementia in Alzheimer disease	rs2602731	G	A	-0.00766675	0.00136907	2.1e-08	0.0237291	0.0265111	0.370752
Usual walking pace	Dementia in Alzheimer disease	rs2644135	G	C	0.00751192	0.00133245	1.7e-08	-0.00132887	0.0250906	0.957761
Usual walking pace	Dementia in Alzheimer disease	rs2645979	A	G	0.00861798	0.00132024	6.70039e-11	-0.0218222	0.0229092	0.340816
Usual walking pace	Dementia in Alzheimer disease	rs273512	T	C	-0.00966507	0.00129058	6.89922e-14	0.00740523	0.0228959	0.74637
Usual walking pace	Dementia in Alzheimer disease	rs28519617	G	T	-0.00812933	0.0014336	1.40001e-08	0.0389831	0.0277733	0.160433
Usual walking pace	Dementia in Alzheimer disease	rs35711462	G	A	-0.0071659	0.00126947	1.7e-08	0.000689418	0.0227972	0.975875
Usual walking pace	Dementia in Alzheimer disease	rs4109292	A	G	0.00735336	0.00126787	6.59994e-09	-0.00522057	0.0229212	0.819831
Usual walking pace	Dementia in Alzheimer disease	rs4516268	A	C	0.00983008	0.00160664	9.49992e-10	0.0109732	0.0261406	0.674648
Usual walking pace	Dementia in Alzheimer disease	rs45583845	G	C	-0.0198998	0.0036328	4.30002e-08	-0.0125887	0.0682527	0.853666
Usual walking pace	Dementia in Alzheimer disease	rs4643373	C	T	0.0077266	0.00138223	2.30001e-08	-0.00790493	0.0253151	0.754842
Usual walking pace	Dementia in Alzheimer disease	rs4715208	G	A	-0.0083844	0.00146572	1.09999e-08	0.0143808	0.0265456	0.588
Usual walking pace	Dementia in Alzheimer disease	rs4839898	A	G	0.0130564	0.00206037	2.30001e-10	-0.0129035	0.0367873	0.72577
Usual walking pace	Dementia in Alzheimer disease	rs55680124	T	C	-0.010742	0.00174984	8.30004e-10	-0.00800657	0.0357245	0.822664
Usual walking pace	Dementia in Alzheimer disease	rs57800857	C	A	0.00867607	0.00132214	5.30029e-11	-0.295655	0.376878	0.432756
Usual walking pace	Dementia in Alzheimer disease	rs613872	T	G	-0.0147074	0.00167052	1.29987e-18	-0.00508515	0.0312175	0.870602
Usual walking pace	Dementia in Alzheimer disease	rs62048402	A	G	-0.00987537	0.00129011	1.9002e-14	-0.0196763	0.0230736	0.39379
Usual walking pace	Dementia in Alzheimer disease	rs6763292	G	A	0.00958833	0.00153076	3.79997e-10	0.0193254	0.0299407	0.51863
Usual walking pace	Dementia in Alzheimer disease	rs7789719	C	T	0.00854199	0.00153719	2.69998e-08	-0.0271691	0.0266207	0.307444
Usual walking pace	Dementia in Alzheimer disease	rs7795394	A	T	0.00930493	0.00130867	1.20005e-12	0.00783897	0.0250463	0.754296
Usual walking pace	Dementia in Alzheimer disease	rs8010773	C	T	-0.00816754	0.00130079	3.40001e-10	0.0528149	0.0250797	0.0352144
Usual walking pace	Dementia in Alzheimer disease	rs8011870	A	G	-0.00782739	0.00140635	2.59998e-08	-0.00712847	0.0229615	0.756216
Usual walking pace	Dementia in Alzheimer disease	rs819167	G	A	-0.0157993	0.00259282	1.09999e-09	0.0407588	0.0390549	0.296657
Usual walking pace	Dementia in Alzheimer disease	rs830627	A	G	0.00742054	0.00128505	7.69999e-09	0.00281508	0.0227601	0.901565
Usual walking pace	Dementia in Alzheimer disease	rs891387	C	T	0.00786028	0.00126616	5.39995e-10	0.0540593	0.0227935	0.0177068
Usual walking pace	Dementia in Alzheimer disease	rs9366651	T	G	0.00948542	0.00127132	8.60003e-14	-0.0217105	0.0236302	0.358223
Usual walking pace	Dementia in Alzheimer disease	rs9783304	T	G	0.00763598	0.00136834	2.39999e-08	-0.0270629	0.0245939	0.271163
Usual walking pace	Dementia	rs10828258	G	A	-0.00932641	0.00135882	6.70039e-12	-0.0343035	0.0146551	0.0192469
Usual walking pace	Dementia	rs10862220	G	T	0.00840767	0.00135051	4.79999e-10	-0.0244991	0.0137025	0.073787
Usual walking pace	Dementia	rs10883618	A	G	0.0078103	0.00130834	2.39999e-09	-0.0176756	0.0142478	0.214758
Usual walking pace	Dementia	rs11039324	A	G	-0.0102105	0.00128765	2.19989e-15	-0.0297985	0.0139419	0.0325702
Usual walking pace	Dementia	rs11077815	C	T	-0.00713336	0.00130691	4.79999e-08	-0.00334228	0.0146866	0.819978
Usual walking pace	Dementia	rs11150623	T	G	-0.00968813	0.0013224	2.39994e-13	-0.0287356	0.0137386	0.0364746
Usual walking pace	Dementia	rs11152989	T	C	-0.00751226	0.00136699	3.89996e-08	0.00162542	0.014785	0.912459
Usual walking pace	Dementia	rs113825410	G	A	-0.00881182	0.00151778	6.4e-09	-0.0331431	0.0167276	0.0475532
Usual walking pace	Dementia	rs11548200	C	T	-0.016041	0.00255177	3.29997e-10	0.00253765	0.0348419	0.941939
Usual walking pace	Dementia	rs11682482	G	T	0.00801894	0.00135595	3.29997e-09	0.00631795	0.0143241	0.659162
Usual walking pace	Dementia	rs11732213	C	T	0.0091614	0.00159593	9.40005e-09	-0.0197622	0.0165863	0.233465
Usual walking pace	Dementia	rs11761141	G	T	-0.00789936	0.00135132	5e-09	0.00724632	0.0144708	0.616542
Usual walking pace	Dementia	rs11848096	C	T	-0.00750831	0.00130696	9.20005e-09	0.0106065	0.0138722	0.444519
Usual walking pace	Dementia	rs12042959	G	A	0.0125663	0.00181269	4.10015e-12	0.00907397	0.0186568	0.626711
Usual walking pace	Dementia	rs12461902	A	G	-0.00801134	0.00135739	3.59998e-09	0.0120729	0.0144523	0.403512
Usual walking pace	Dementia	rs12747822	A	T	0.0117683	0.00213998	3.79997e-08	0.0160909	0.0315654	0.610217
Usual walking pace	Dementia	rs144333966	G	A	0.0304614	0.00544615	2.19999e-08	0.0376323	0.0394922	0.340638
Usual walking pace	Dementia	rs1592	C	A	0.0074513	0.00128817	7.29995e-09	0.0299617	0.0137692	0.0295556
Usual walking pace	Dementia	rs2037735	T	C	-0.0112677	0.00194308	6.69993e-09	0.00560162	0.0193674	0.772407
Usual walking pace	Dementia	rs205262	G	A	-0.00870949	0.00142654	1e-09	0.00610383	0.0152541	0.68905
Usual walking pace	Dementia	rs2170670	A	G	-0.00708769	0.0012972	4.70002e-08	-0.009288	0.0142259	0.513825
Usual walking pace	Dementia	rs2297600	G	T	-0.0115607	0.00168167	6.20012e-12	0.0100525	0.0165558	0.543726
Usual walking pace	Dementia	rs2439823	G	A	-0.0072789	0.00127453	1.09999e-08	0.0286753	0.0136804	0.0360745
Usual walking pace	Dementia	rs2602731	G	A	-0.00766675	0.00136907	2.1e-08	0.0380888	0.0158728	0.0164116
Usual walking pace	Dementia	rs2644135	G	C	0.00751192	0.00133245	1.7e-08	0.00616218	0.0149836	0.680881
Usual walking pace	Dementia	rs2645979	A	G	0.00861798	0.00132024	6.70039e-11	-0.0110319	0.0137187	0.421306
Usual walking pace	Dementia	rs273512	T	C	-0.00966507	0.00129058	6.89922e-14	-0.0171671	0.0137093	0.210487
Usual walking pace	Dementia	rs28519617	G	T	-0.00812933	0.0014336	1.40001e-08	0.0317051	0.0166401	0.0567349
Usual walking pace	Dementia	rs35711462	G	A	-0.0071659	0.00126947	1.7e-08	-0.00154638	0.0136547	0.909833
Usual walking pace	Dementia	rs4109292	A	G	0.00735336	0.00126787	6.59994e-09	0.00326953	0.0137209	0.811657
Usual walking pace	Dementia	rs4516268	A	C	0.00983008	0.00160664	9.49992e-10	0.0200014	0.0156312	0.200692
Usual walking pace	Dementia	rs45583845	G	C	-0.0198998	0.0036328	4.30002e-08	0.0163629	0.0408787	0.688952
Usual walking pace	Dementia	rs4643373	C	T	0.0077266	0.00138223	2.30001e-08	-0.0100504	0.0151346	0.506649
Usual walking pace	Dementia	rs4715208	G	A	-0.0083844	0.00146572	1.09999e-08	0.00703108	0.0159133	0.658606
Usual walking pace	Dementia	rs4839898	A	G	0.0130564	0.00206037	2.30001e-10	0.00780548	0.0218673	0.721131
Usual walking pace	Dementia	rs55680124	T	C	-0.010742	0.00174984	8.30004e-10	0.00963601	0.0212864	0.650775
Usual walking pace	Dementia	rs57800857	C	A	0.00867607	0.00132214	5.30029e-11	0.0346299	0.219536	0.874661
Usual walking pace	Dementia	rs613872	T	G	-0.0147074	0.00167052	1.29987e-18	0.00101957	0.0186601	0.956426
Usual walking pace	Dementia	rs62048402	A	G	-0.00987537	0.00129011	1.9002e-14	-0.0109901	0.0137831	0.425241
Usual walking pace	Dementia	rs6763292	G	A	0.00958833	0.00153076	3.79997e-10	0.0171083	0.0179969	0.341796
Usual walking pace	Dementia	rs7789719	C	T	0.00854199	0.00153719	2.69998e-08	-0.0247233	0.0159716	0.121633
Usual walking pace	Dementia	rs7795394	A	T	0.00930493	0.00130867	1.20005e-12	-0.00353437	0.015011	0.813858
Usual walking pace	Dementia	rs8010773	C	T	-0.00816754	0.00130079	3.40001e-10	0.0460829	0.014929	0.00202325
Usual walking pace	Dementia	rs8011870	A	G	-0.00782739	0.00140635	2.59998e-08	-0.0124661	0.0137577	0.364872
Usual walking pace	Dementia	rs819167	G	A	-0.0157993	0.00259282	1.09999e-09	0.031725	0.0234002	0.175177
Usual walking pace	Dementia	rs830627	A	G	0.00742054	0.00128505	7.69999e-09	-0.00526956	0.0136467	0.699393
Usual walking pace	Dementia	rs891387	C	T	0.00786028	0.00126616	5.39995e-10	0.0256741	0.0136638	0.0602462
Usual walking pace	Dementia	rs9366651	T	G	0.00948542	0.00127132	8.60003e-14	-1.03579e-05	0.0141252	0.999415
Usual walking pace	Dementia	rs9783304	T	G	0.00763598	0.00136834	2.39999e-08	-0.000973862	0.0147565	0.947382
Usual walking pace	Unspecified dementia	rs10828258	G	A	-0.00932641	0.00135882	6.70039e-12	-0.0916783	0.0282925	0.00119374
Usual walking pace	Unspecified dementia	rs10862220	G	T	0.00840767	0.00135051	4.79999e-10	-0.0542903	0.026326	0.039185
Usual walking pace	Unspecified dementia	rs10883618	A	G	0.0078103	0.00130834	2.39999e-09	-0.00844266	0.0273039	0.757161
Usual walking pace	Unspecified dementia	rs11039324	A	G	-0.0102105	0.00128765	2.19989e-15	-0.00350653	0.0266449	0.895299
Usual walking pace	Unspecified dementia	rs11077815	C	T	-0.00713336	0.00130691	4.79999e-08	-0.0116173	0.02826	0.681009
Usual walking pace	Unspecified dementia	rs11150623	T	G	-0.00968813	0.0013224	2.39994e-13	-0.00351218	0.0264268	0.894271
Usual walking pace	Unspecified dementia	rs11152989	T	C	-0.00751226	0.00136699	3.89996e-08	-0.00402313	0.0283801	0.88727
Usual walking pace	Unspecified dementia	rs113825410	G	A	-0.00881182	0.00151778	6.4e-09	-0.0756724	0.0320919	0.0183743
Usual walking pace	Unspecified dementia	rs11548200	C	T	-0.016041	0.00255177	3.29997e-10	-0.00610173	0.0666673	0.927075
Usual walking pace	Unspecified dementia	rs11682482	G	T	0.00801894	0.00135595	3.29997e-09	0.00275427	0.0274118	0.919965
Usual walking pace	Unspecified dementia	rs11732213	C	T	0.0091614	0.00159593	9.40005e-09	-0.0547012	0.0317161	0.0845785
Usual walking pace	Unspecified dementia	rs11761141	G	T	-0.00789936	0.00135132	5e-09	0.0244423	0.0276837	0.377283
Usual walking pace	Unspecified dementia	rs11848096	C	T	-0.00750831	0.00130696	9.20005e-09	0.0268502	0.0265786	0.312391
Usual walking pace	Unspecified dementia	rs12042959	G	A	0.0125663	0.00181269	4.10015e-12	-0.0164793	0.0358121	0.6454
Usual walking pace	Unspecified dementia	rs12461902	A	G	-0.00801134	0.00135739	3.59998e-09	0.0289317	0.0277026	0.296317
Usual walking pace	Unspecified dementia	rs12747822	A	T	0.0117683	0.00213998	3.79997e-08	6.48715e-05	0.0592077	0.999126
Usual walking pace	Unspecified dementia	rs144333966	G	A	0.0304614	0.00544615	2.19999e-08	0.169206	0.0754713	0.024962
Usual walking pace	Unspecified dementia	rs1592	C	A	0.0074513	0.00128817	7.29995e-09	0.0462234	0.0264307	0.0803175
Usual walking pace	Unspecified dementia	rs2037735	T	C	-0.0112677	0.00194308	6.69993e-09	-0.0482071	0.0372765	0.195932
Usual walking pace	Unspecified dementia	rs205262	G	A	-0.00870949	0.00142654	1e-09	-0.00492572	0.0295012	0.867396
Usual walking pace	Unspecified dementia	rs2170670	A	G	-0.00708769	0.0012972	4.70002e-08	-0.00386797	0.0273911	0.887702
Usual walking pace	Unspecified dementia	rs2297600	G	T	-0.0115607	0.00168167	6.20012e-12	-0.00747323	0.0317571	0.813957
Usual walking pace	Unspecified dementia	rs2439823	G	A	-0.0072789	0.00127453	1.09999e-08	0.0218192	0.0262056	0.405062
Usual walking pace	Unspecified dementia	rs2602731	G	A	-0.00766675	0.00136907	2.1e-08	0.00687704	0.0304132	0.821108
Usual walking pace	Unspecified dementia	rs2644135	G	C	0.00751192	0.00133245	1.7e-08	0.013761	0.0287193	0.631828
Usual walking pace	Unspecified dementia	rs2645979	A	G	0.00861798	0.00132024	6.70039e-11	-0.0127879	0.0262922	0.6267
Usual walking pace	Unspecified dementia	rs273512	T	C	-0.00966507	0.00129058	6.89922e-14	-0.0598872	0.0263111	0.0228392
Usual walking pace	Unspecified dementia	rs28519617	G	T	-0.00812933	0.0014336	1.40001e-08	0.0220834	0.0316551	0.485411
Usual walking pace	Unspecified dementia	rs35711462	G	A	-0.0071659	0.00126947	1.7e-08	-0.0510624	0.0262128	0.0514162
Usual walking pace	Unspecified dementia	rs4109292	A	G	0.00735336	0.00126787	6.59994e-09	0.0263981	0.0262386	0.314377
Usual walking pace	Unspecified dementia	rs4516268	A	C	0.00983008	0.00160664	9.49992e-10	0.02878	0.0299619	0.336777
Usual walking pace	Unspecified dementia	rs45583845	G	C	-0.0198998	0.0036328	4.30002e-08	0.0785843	0.0782403	0.315188
Usual walking pace	Unspecified dementia	rs4643373	C	T	0.0077266	0.00138223	2.30001e-08	0.00236091	0.0289523	0.935009
Usual walking pace	Unspecified dementia	rs4715208	G	A	-0.0083844	0.00146572	1.09999e-08	0.0354095	0.0306519	0.248003
Usual walking pace	Unspecified dementia	rs4839898	A	G	0.0130564	0.00206037	2.30001e-10	-0.0226222	0.0417025	0.587497
Usual walking pace	Unspecified dementia	rs55680124	T	C	-0.010742	0.00174984	8.30004e-10	0.0330507	0.0405816	0.415401
Usual walking pace	Unspecified dementia	rs57800857	C	A	0.00867607	0.00132214	5.30029e-11	0.175041	0.388332	0.65217
Usual walking pace	Unspecified dementia	rs613872	T	G	-0.0147074	0.00167052	1.29987e-18	0.0356256	0.0357927	0.319575
Usual walking pace	Unspecified dementia	rs62048402	A	G	-0.00987537	0.00129011	1.9002e-14	-0.0339451	0.0264771	0.199824
Usual walking pace	Unspecified dementia	rs6763292	G	A	0.00958833	0.00153076	3.79997e-10	0.0232565	0.0343909	0.498888
Usual walking pace	Unspecified dementia	rs7789719	C	T	0.00854199	0.00153719	2.69998e-08	-0.00245853	0.0305278	0.935813
Usual walking pace	Unspecified dementia	rs7795394	A	T	0.00930493	0.00130867	1.20005e-12	-0.0266476	0.0286645	0.352559
Usual walking pace	Unspecified dementia	rs8010773	C	T	-0.00816754	0.00130079	3.40001e-10	0.0855505	0.0282778	0.00248336
Usual walking pace	Unspecified dementia	rs8011870	A	G	-0.00782739	0.00140635	2.59998e-08	-0.0217111	0.026384	0.410573
Usual walking pace	Unspecified dementia	rs819167	G	A	-0.0157993	0.00259282	1.09999e-09	0.0173936	0.0450256	0.69927
Usual walking pace	Unspecified dementia	rs830627	A	G	0.00742054	0.00128505	7.69999e-09	-0.00656162	0.0261476	0.801857
Usual walking pace	Unspecified dementia	rs891387	C	T	0.00786028	0.00126616	5.39995e-10	0.027621	0.026161	0.291055
Usual walking pace	Unspecified dementia	rs9366651	T	G	0.00948542	0.00127132	8.60003e-14	0.0109503	0.0270358	0.685455
Usual walking pace	Unspecified dementia	rs9783304	T	G	0.00763598	0.00136834	2.39999e-08	0.0169413	0.0282908	0.549289
Usual walking pace	Vascular dementia	rs10828258	G	A	-0.00932641	0.00135882	6.70039e-12	-0.0558661	0.0347169	0.107575
Usual walking pace	Vascular dementia	rs10862220	G	T	0.00840767	0.00135051	4.79999e-10	-0.0374375	0.032553	0.250124
Usual walking pace	Vascular dementia	rs10883618	A	G	0.0078103	0.00130834	2.39999e-09	-0.0659501	0.0336977	0.0503338
Usual walking pace	Vascular dementia	rs11039324	A	G	-0.0102105	0.00128765	2.19989e-15	-0.0358483	0.0330612	0.278231
Usual walking pace	Vascular dementia	rs11077815	C	T	-0.00713336	0.00130691	4.79999e-08	0.0197908	0.0347624	0.569141
Usual walking pace	Vascular dementia	rs11150623	T	G	-0.00968813	0.0013224	2.39994e-13	-0.0192076	0.032666	0.556532
Usual walking pace	Vascular dementia	rs11152989	T	C	-0.00751226	0.00136699	3.89996e-08	-0.00672301	0.0351586	0.848354
Usual walking pace	Vascular dementia	rs113825410	G	A	-0.00881182	0.00151778	6.4e-09	-0.0296324	0.0397435	0.455915
Usual walking pace	Vascular dementia	rs11548200	C	T	-0.016041	0.00255177	3.29997e-10	0.123834	0.0819653	0.130838
Usual walking pace	Vascular dementia	rs11682482	G	T	0.00801894	0.00135595	3.29997e-09	-0.00891495	0.0338988	0.792562
Usual walking pace	Vascular dementia	rs11732213	C	T	0.0091614	0.00159593	9.40005e-09	-0.0204963	0.0393806	0.602737
Usual walking pace	Vascular dementia	rs11761141	G	T	-0.00789936	0.00135132	5e-09	0.0207525	0.0340788	0.542553
Usual walking pace	Vascular dementia	rs11848096	C	T	-0.00750831	0.00130696	9.20005e-09	0.0313001	0.0328509	0.340695
Usual walking pace	Vascular dementia	rs12042959	G	A	0.0125663	0.00181269	4.10015e-12	0.0420371	0.0442526	0.342146
Usual walking pace	Vascular dementia	rs12461902	A	G	-0.00801134	0.00135739	3.59998e-09	0.0406322	0.0343182	0.236419
Usual walking pace	Vascular dementia	rs12747822	A	T	0.0117683	0.00213998	3.79997e-08	0.0377205	0.0736162	0.608376
Usual walking pace	Vascular dementia	rs144333966	G	A	0.0304614	0.00544615	2.19999e-08	0.0254616	0.0943513	0.787269
Usual walking pace	Vascular dementia	rs1592	C	A	0.0074513	0.00128817	7.29995e-09	0.0193717	0.0326258	0.552678
Usual walking pace	Vascular dementia	rs2037735	T	C	-0.0112677	0.00194308	6.69993e-09	-0.0316261	0.0462626	0.494214
Usual walking pace	Vascular dementia	rs205262	G	A	-0.00870949	0.00142654	1e-09	-0.0196606	0.0363879	0.588987
Usual walking pace	Vascular dementia	rs2170670	A	G	-0.00708769	0.0012972	4.70002e-08	0.017306	0.0338078	0.608725
Usual walking pace	Vascular dementia	rs2297600	G	T	-0.0115607	0.00168167	6.20012e-12	0.0134675	0.0393138	0.731926
Usual walking pace	Vascular dementia	rs2439823	G	A	-0.0072789	0.00127453	1.09999e-08	-0.00158614	0.0324046	0.960961
Usual walking pace	Vascular dementia	rs2602731	G	A	-0.00766675	0.00136907	2.1e-08	0.0649723	0.0376416	0.0843335
Usual walking pace	Vascular dementia	rs2644135	G	C	0.00751192	0.00133245	1.7e-08	-0.00171642	0.0356101	0.961557
Usual walking pace	Vascular dementia	rs2645979	A	G	0.00861798	0.00132024	6.70039e-11	-0.0164363	0.0325268	0.613337
Usual walking pace	Vascular dementia	rs273512	T	C	-0.00966507	0.00129058	6.89922e-14	-0.0322372	0.0326308	0.323182
Usual walking pace	Vascular dementia	rs28519617	G	T	-0.00812933	0.0014336	1.40001e-08	0.0264277	0.0392577	0.500831
Usual walking pace	Vascular dementia	rs35711462	G	A	-0.0071659	0.00126947	1.7e-08	-0.012438	0.0323278	0.700424
Usual walking pace	Vascular dementia	rs4109292	A	G	0.00735336	0.00126787	6.59994e-09	-0.0146328	0.0324082	0.651618
Usual walking pace	Vascular dementia	rs4516268	A	C	0.00983008	0.00160664	9.49992e-10	-0.011351	0.0370726	0.759464
Usual walking pace	Vascular dementia	rs45583845	G	C	-0.0198998	0.0036328	4.30002e-08	-0.0693282	0.0986236	0.482082
Usual walking pace	Vascular dementia	rs4643373	C	T	0.0077266	0.00138223	2.30001e-08	0.00136573	0.0355884	0.969388
Usual walking pace	Vascular dementia	rs4715208	G	A	-0.0083844	0.00146572	1.09999e-08	0.0183735	0.0380674	0.629338
Usual walking pace	Vascular dementia	rs4839898	A	G	0.0130564	0.00206037	2.30001e-10	0.0845233	0.0514279	0.100273
Usual walking pace	Vascular dementia	rs55680124	T	C	-0.010742	0.00174984	8.30004e-10	-0.0706778	0.0503417	0.160331
Usual walking pace	Vascular dementia	rs57800857	C	A	0.00867607	0.00132214	5.30029e-11	-1.15565	0.546168	0.034351
Usual walking pace	Vascular dementia	rs613872	T	G	-0.0147074	0.00167052	1.29987e-18	-0.114754	0.0429534	0.00754936
Usual walking pace	Vascular dementia	rs62048402	A	G	-0.00987537	0.00129011	1.9002e-14	-0.027875	0.0326606	0.393396
Usual walking pace	Vascular dementia	rs6763292	G	A	0.00958833	0.00153076	3.79997e-10	0.0250741	0.0428362	0.558313
Usual walking pace	Vascular dementia	rs7789719	C	T	0.00854199	0.00153719	2.69998e-08	-0.00455132	0.0377332	0.903993
Usual walking pace	Vascular dementia	rs7795394	A	T	0.00930493	0.00130867	1.20005e-12	-0.0112736	0.0355132	0.750905
Usual walking pace	Vascular dementia	rs8010773	C	T	-0.00816754	0.00130079	3.40001e-10	0.0411171	0.0355704	0.247708
Usual walking pace	Vascular dementia	rs8011870	A	G	-0.00782739	0.00140635	2.59998e-08	0.00811968	0.032657	0.803643
Usual walking pace	Vascular dementia	rs819167	G	A	-0.0157993	0.00259282	1.09999e-09	0.0474351	0.055866	0.395833
Usual walking pace	Vascular dementia	rs830627	A	G	0.00742054	0.00128505	7.69999e-09	-0.0297216	0.0322009	0.356004
Usual walking pace	Vascular dementia	rs891387	C	T	0.00786028	0.00126616	5.39995e-10	-0.0147519	0.0323925	0.648814
Usual walking pace	Vascular dementia	rs9366651	T	G	0.00948542	0.00127132	8.60003e-14	0.0629851	0.0335371	0.0603712
Usual walking pace	Vascular dementia	rs9783304	T	G	0.00763598	0.00136834	2.39999e-08	0.0292751	0.0349609	0.402386
Usual walking pace	Frontotemporal dementia, wide, incl. Pick's disease	rs10828258	G	A	-0.00932641	0.00135882	6.70039e-12	-0.0446605	0.13952	0.74889
Usual walking pace	Frontotemporal dementia, wide, incl. Pick's disease	rs10862220	G	T	0.00840767	0.00135051	4.79999e-10	-0.103541	0.130867	0.428834
Usual walking pace	Frontotemporal dementia, wide, incl. Pick's disease	rs10883618	A	G	0.0078103	0.00130834	2.39999e-09	-0.0993966	0.13688	0.467742
Usual walking pace	Frontotemporal dementia, wide, incl. Pick's disease	rs11039324	A	G	-0.0102105	0.00128765	2.19989e-15	0.0260866	0.134328	0.846019
Usual walking pace	Frontotemporal dementia, wide, incl. Pick's disease	rs11077815	C	T	-0.00713336	0.00130691	4.79999e-08	-0.0403798	0.140251	0.773416
Usual walking pace	Frontotemporal dementia, wide, incl. Pick's disease	rs11150623	T	G	-0.00968813	0.0013224	2.39994e-13	-0.195791	0.131642	0.136934
Usual walking pace	Frontotemporal dementia, wide, incl. Pick's disease	rs11152989	T	C	-0.00751226	0.00136699	3.89996e-08	0.127393	0.142024	0.369726
Usual walking pace	Frontotemporal dementia, wide, incl. Pick's disease	rs113825410	G	A	-0.00881182	0.00151778	6.4e-09	-0.0189958	0.158766	0.904763
Usual walking pace	Frontotemporal dementia, wide, incl. Pick's disease	rs11548200	C	T	-0.016041	0.00255177	3.29997e-10	-0.32892	0.341639	0.335663
Usual walking pace	Frontotemporal dementia, wide, incl. Pick's disease	rs11682482	G	T	0.00801894	0.00135595	3.29997e-09	0.00205371	0.137376	0.988072
Usual walking pace	Frontotemporal dementia, wide, incl. Pick's disease	rs11732213	C	T	0.0091614	0.00159593	9.40005e-09	-0.0347586	0.157861	0.825728
Usual walking pace	Frontotemporal dementia, wide, incl. Pick's disease	rs11761141	G	T	-0.00789936	0.00135132	5e-09	-0.0496771	0.139599	0.721948
Usual walking pace	Frontotemporal dementia, wide, incl. Pick's disease	rs11848096	C	T	-0.00750831	0.00130696	9.20005e-09	0.0769235	0.132833	0.562521
Usual walking pace	Frontotemporal dementia, wide, incl. Pick's disease	rs12042959	G	A	0.0125663	0.00181269	4.10015e-12	0.342209	0.179449	0.0565197
Usual walking pace	Frontotemporal dementia, wide, incl. Pick's disease	rs12461902	A	G	-0.00801134	0.00135739	3.59998e-09	0.229462	0.138881	0.0984895
Usual walking pace	Frontotemporal dementia, wide, incl. Pick's disease	rs12747822	A	T	0.0117683	0.00213998	3.79997e-08	-0.268971	0.31644	0.395329
Usual walking pace	Frontotemporal dementia, wide, incl. Pick's disease	rs144333966	G	A	0.0304614	0.00544615	2.19999e-08	-0.166244	0.380153	0.661887
Usual walking pace	Frontotemporal dementia, wide, incl. Pick's disease	rs1592	C	A	0.0074513	0.00128817	7.29995e-09	0.108338	0.13102	0.408307
Usual walking pace	Frontotemporal dementia, wide, incl. Pick's disease	rs2037735	T	C	-0.0112677	0.00194308	6.69993e-09	-0.124176	0.183332	0.498199
Usual walking pace	Frontotemporal dementia, wide, incl. Pick's disease	rs205262	G	A	-0.00870949	0.00142654	1e-09	-0.154604	0.144687	0.285277
Usual walking pace	Frontotemporal dementia, wide, incl. Pick's disease	rs2170670	A	G	-0.00708769	0.0012972	4.70002e-08	-0.0529794	0.135734	0.696303
Usual walking pace	Frontotemporal dementia, wide, incl. Pick's disease	rs2297600	G	T	-0.0115607	0.00168167	6.20012e-12	-0.191497	0.157639	0.224448
Usual walking pace	Frontotemporal dementia, wide, incl. Pick's disease	rs2439823	G	A	-0.0072789	0.00127453	1.09999e-08	-0.0733179	0.131725	0.577802
Usual walking pace	Frontotemporal dementia, wide, incl. Pick's disease	rs2602731	G	A	-0.00766675	0.00136907	2.1e-08	0.139338	0.152697	0.3615
Usual walking pace	Frontotemporal dementia, wide, incl. Pick's disease	rs2644135	G	C	0.00751192	0.00133245	1.7e-08	-0.033783	0.143031	0.813283
Usual walking pace	Frontotemporal dementia, wide, incl. Pick's disease	rs2645979	A	G	0.00861798	0.00132024	6.70039e-11	-0.0183285	0.131801	0.889401
Usual walking pace	Frontotemporal dementia, wide, incl. Pick's disease	rs273512	T	C	-0.00966507	0.00129058	6.89922e-14	-0.12109	0.131342	0.356559
Usual walking pace	Frontotemporal dementia, wide, incl. Pick's disease	rs28519617	G	T	-0.00812933	0.0014336	1.40001e-08	-0.0676447	0.162113	0.676482
Usual walking pace	Frontotemporal dementia, wide, incl. Pick's disease	rs35711462	G	A	-0.0071659	0.00126947	1.7e-08	-0.361148	0.119953	0.00260597
Usual walking pace	Frontotemporal dementia, wide, incl. Pick's disease	rs4109292	A	G	0.00735336	0.00126787	6.59994e-09	0.0445797	0.13122	0.734057
Usual walking pace	Frontotemporal dementia, wide, incl. Pick's disease	rs4516268	A	C	0.00983008	0.00160664	9.49992e-10	0.0549711	0.149367	0.712853
Usual walking pace	Frontotemporal dementia, wide, incl. Pick's disease	rs45583845	G	C	-0.0198998	0.0036328	4.30002e-08	0.039793	0.389715	0.918671
Usual walking pace	Frontotemporal dementia, wide, incl. Pick's disease	rs4643373	C	T	0.0077266	0.00138223	2.30001e-08	-0.0209235	0.145791	0.885881
Usual walking pace	Frontotemporal dementia, wide, incl. Pick's disease	rs4715208	G	A	-0.0083844	0.00146572	1.09999e-08	0.218578	0.150213	0.145636
Usual walking pace	Frontotemporal dementia, wide, incl. Pick's disease	rs4839898	A	G	0.0130564	0.00206037	2.30001e-10	0.0453901	0.209705	0.828638
Usual walking pace	Frontotemporal dementia, wide, incl. Pick's disease	rs55680124	T	C	-0.010742	0.00174984	8.30004e-10	0.328411	0.204555	0.108387
Usual walking pace	Frontotemporal dementia, wide, incl. Pick's disease	rs57800857	C	A	0.00867607	0.00132214	5.30029e-11	-1.48549	2.41701	0.538822
Usual walking pace	Frontotemporal dementia, wide, incl. Pick's disease	rs613872	T	G	-0.0147074	0.00167052	1.29987e-18	0.133077	0.177362	0.453067
Usual walking pace	Frontotemporal dementia, wide, incl. Pick's disease	rs62048402	A	G	-0.00987537	0.00129011	1.9002e-14	-0.105683	0.132185	0.423999
Usual walking pace	Frontotemporal dementia, wide, incl. Pick's disease	rs6763292	G	A	0.00958833	0.00153076	3.79997e-10	-0.122469	0.172073	0.476633
Usual walking pace	Frontotemporal dementia, wide, incl. Pick's disease	rs7789719	C	T	0.00854199	0.00153719	2.69998e-08	-0.11402	0.152646	0.455088
Usual walking pace	Frontotemporal dementia, wide, incl. Pick's disease	rs7795394	A	T	0.00930493	0.00130867	1.20005e-12	0.173247	0.144098	0.229252
Usual walking pace	Frontotemporal dementia, wide, incl. Pick's disease	rs8010773	C	T	-0.00816754	0.00130079	3.40001e-10	0.0298478	0.145059	0.836976
Usual walking pace	Frontotemporal dementia, wide, incl. Pick's disease	rs8011870	A	G	-0.00782739	0.00140635	2.59998e-08	-0.0151497	0.131758	0.90846
Usual walking pace	Frontotemporal dementia, wide, incl. Pick's disease	rs819167	G	A	-0.0157993	0.00259282	1.09999e-09	-0.156989	0.221018	0.477518
Usual walking pace	Frontotemporal dementia, wide, incl. Pick's disease	rs830627	A	G	0.00742054	0.00128505	7.69999e-09	0.118467	0.130386	0.363571
Usual walking pace	Frontotemporal dementia, wide, incl. Pick's disease	rs891387	C	T	0.00786028	0.00126616	5.39995e-10	-0.0460271	0.130916	0.725157
Usual walking pace	Frontotemporal dementia, wide, incl. Pick's disease	rs9366651	T	G	0.00948542	0.00127132	8.60003e-14	-0.073932	0.136229	0.587335
Usual walking pace	Frontotemporal dementia, wide, incl. Pick's disease	rs9783304	T	G	0.00763598	0.00136834	2.39999e-08	0.212383	0.140214	0.129846
Physical activity	Dementia with Lewy bodies	rs10120942	A	C	-0.185275	0.0378285	9.90011e-07	-0.037527	0.0376036	0.318269
Physical activity	Dementia with Lewy bodies	rs10475334	A	G	-0.266046	0.0561067	2.30001e-06	0.0227981	0.054918	0.678033
Physical activity	Dementia with Lewy bodies	rs10809491	C	T	-0.220498	0.0430216	2.59998e-07	-0.000186017	0.0416778	0.996431
Physical activity	Dementia with Lewy bodies	rs10880697	C	G	0.206675	0.0396985	1.79999e-07	0.0202535	0.0397281	0.610247
Physical activity	Dementia with Lewy bodies	rs1105867	C	T	0.228027	0.0449976	3.79997e-07	-0.011029	0.0441716	0.802761
Physical activity	Dementia with Lewy bodies	rs12446623	G	T	0.251017	0.0533453	2.39999e-06	0.0140508	0.0541002	0.795143
Physical activity	Dementia with Lewy bodies	rs12448218	A	G	0.188139	0.0396079	2.1e-06	-0.0280734	0.0390613	0.47232
Physical activity	Dementia with Lewy bodies	rs12460611	G	A	-0.188396	0.0402585	2.69998e-06	-0.00356033	0.0400974	0.929245
Physical activity	Dementia with Lewy bodies	rs1268539	A	C	0.213697	0.0379602	1.89998e-08	-0.0144124	0.0373445	0.699546
Physical activity	Dementia with Lewy bodies	rs12989603	C	A	-0.213397	0.0407425	1.79999e-07	0.0348458	0.0405585	0.390283
Physical activity	Dementia with Lewy bodies	rs133309	A	G	-0.418335	0.0838665	5.19996e-07	0.0866565	0.0793705	0.274925
Physical activity	Dementia with Lewy bodies	rs148193266	C	A	0.459217	0.0952417	1.40001e-06	0.0560211	0.0937921	0.55033
Physical activity	Dementia with Lewy bodies	rs1668835	A	T	0.209833	0.0405127	2e-07	0.0487044	0.0394198	0.216656
Physical activity	Dementia with Lewy bodies	rs2683156	C	T	-0.176646	0.037795	2.90001e-06	0.0153319	0.0369938	0.678572
Physical activity	Dementia with Lewy bodies	rs28432971	A	T	0.18741	0.0392585	1.79999e-06	-0.0183188	0.0384765	0.634004
Physical activity	Dementia with Lewy bodies	rs34908	A	G	0.199105	0.042079	2.1e-06	0.0291801	0.0415687	0.482686
Physical activity	Dementia with Lewy bodies	rs35058145	A	G	0.45734	0.100042	4.70002e-06	0.0495423	0.102385	0.6285
Physical activity	Dementia with Lewy bodies	rs351091	A	C	0.206784	0.0441798	2.99999e-06	0.0556901	0.0441066	0.206757
Physical activity	Dementia with Lewy bodies	rs4921269	C	A	0.176352	0.0384503	4.30002e-06	0.0294576	0.0378149	0.435985
Physical activity	Dementia with Lewy bodies	rs5742915	C	T	0.177428	0.0375896	2.39999e-06	0.0436915	0.0371953	0.240105
Physical activity	Dementia with Lewy bodies	rs59499656	T	A	0.21528	0.0394668	5e-08	-0.04862	0.0388611	0.210892
Physical activity	Dementia with Lewy bodies	rs6081105	G	A	0.198277	0.0383172	2.19999e-07	-0.018704	0.0377349	0.620078
Physical activity	Dementia with Lewy bodies	rs6895232	A	T	-0.219742	0.0402422	5e-08	0.0468645	0.0396901	0.237696
Physical activity	Dementia with Lewy bodies	rs73249344	G	A	0.231353	0.0482927	1.6e-06	0.0550846	0.0474829	0.246028
Physical activity	Dementia with Lewy bodies	rs73715570	T	C	0.21023	0.04494	2.90001e-06	0.0229838	0.0431552	0.594317
Physical activity	Dementia with Lewy bodies	rs75986475	G	C	0.281739	0.0584516	1.29999e-06	0.0124225	0.0550069	0.821316
Physical activity	Dementia with Lewy bodies	rs76223101	A	G	0.427965	0.0876714	1.09999e-06	0.0538251	0.0827785	0.515537
Physical activity	Dementia with Lewy bodies	rs7626095	T	C	0.179866	0.0383166	2.90001e-06	-0.0252101	0.0373015	0.499138
Physical activity	Dementia with Lewy bodies	rs7658462	T	C	-0.24961	0.0498558	6.59994e-07	0.0543177	0.0493106	0.270635
Physical activity	Dementia with Lewy bodies	rs78982639	A	G	-0.837527	0.177477	2.19999e-06	0.0741051	0.159779	0.642788
Physical activity	Dementia with Lewy bodies	rs791273	G	A	0.203348	0.043279	2.69998e-06	0.0193319	0.0422707	0.647429
Physical activity	Dementia with Lewy bodies	rs9300002	C	T	0.198554	0.0380557	1.7e-07	0.0111575	0.0374525	0.765819
Physical activity	Dementia with Lewy bodies	rs9529057	A	G	0.183271	0.0375319	1e-06	-0.0230875	0.0371202	0.533964
Physical activity	Dementia in Alzheimer disease	rs10067451	A	G	-0.333144	0.0601533	2.99999e-08	-0.106471	0.0473209	0.0244501
[truncated: 1,882 more rows]
