# Supplementary material for: Causal associations between common musculoskeletal disorders and dementia: a Mendelian randomization study
Source: Front Aging Neurosci. 2023 Dec 6;15:1253791. doi: 10.3389/fnagi.2023.1253791 (PMC10731015; doi:10.3389/fnagi.2023.1253791)
Supplement: Supplementary file 5 [file Table_5.XLSX]

## Sheet: Supplementary Table S5
Supplementary Table S5: The SNPs eliminated by MR-PRESSO.
Exposure	Outcome	SNP	Pvalue of MR-PRESSO Outlier Test
All Osteoarthritis	Dementia	rs10405617	0.069
All Osteoarthritis	Dementia	rs1401795	0.269
All Osteoarthritis	Dementia	rs62262106	0.563
Knee Osteoarthritis	Dementia	rs2791549	0.173
Knee Osteoarthritis	Dementia	rs3859514	0.113
Knee Osteoarthritis	Dementia	rs4974591	0.867
Spine Osteoarthritis	Frontotemporal dementia, wide, incl. Pick's disease	rs117175376	0.032
Spine Osteoarthritis	Frontotemporal dementia, wide, incl. Pick's disease	rs185195500	0.224
Spine Osteoarthritis	Frontotemporal dementia, wide, incl. Pick's disease	rs34007448	0.171
Seropositive rheumatoid arthritis	Unspecified dementia	rs1024162	0.3
Seropositive rheumatoid arthritis	Unspecified dementia	rs72849211	0.14
Seropositive rheumatoid arthritis	Unspecified dementia	rs7453967	0.14
Physical activity	Dementia in Alzheimer disease	rs10067451	0.943
Physical activity	Dementia in Alzheimer disease	rs10475334	0.205
Physical activity	Dementia in Alzheimer disease	rs73715570	<0.041
Usual walking pace	Dementia	rs2602731	0.224
Usual walking pace	Dementia	rs2280406	<0.05
Usual walking pace	Dementia	rs11039324	0.096
Usual walking pace	Dementia	rs2297600	0.672
Usual walking pace	Unspecified dementia	rs10828258	0.053
Usual walking pace	Unspecified dementia	rs8011870	<0.053
Hand grip strength (left)	Dementia in Alzheimer disease	rs113434679	0.282
Hand grip strength (left)	Dementia in Alzheimer disease	rs2359239	0.705
Hand grip strength (left)	Dementia in Alzheimer disease	rs4677601	0.987
Hand grip strength (left)	Dementia in Alzheimer disease	rs7148603	0.705
Hand grip strength (left)	Dementia in Alzheimer disease	rs7176095	0.705
Hand grip strength (left)	Dementia in Alzheimer disease	rs9371881	0.141
Hand grip strength (left)	Dementia	rs3819121	0.7
Hand grip strength (left)	Dementia	rs4121165	0.7
Hand grip strength (left)	Dementia	rs7148603	0.42
Hand grip strength (left)	Dementia	rs9371881	0.84
Hand grip strength (right)	Dementia with Lewy bodies	rs41271299	0.131
Hand grip strength (right)	Dementia in Alzheimer disease	rs112330055	0.805
Hand grip strength (right)	Dementia in Alzheimer disease	rs1641457	0.966
Hand grip strength (right)	Dementia in Alzheimer disease	rs4785574	0.483
Hand grip strength (right)	Dementia in Alzheimer disease	rs6006984	<0.161
Hand grip strength (right)	Dementia in Alzheimer disease	rs6693965	0.805
Hand grip strength (right)	Dementia in Alzheimer disease	rs75457267	0.805
Hand grip strength (right)	Dementia in Alzheimer disease	rs9388051	0.322
Hand grip strength (right)	Dementia	rs112330055	0.64
Hand grip strength (right)	Dementia	rs3848369	<0.16
Hand grip strength (right)	Unspecified dementia	rs13355365	<0.16
Hand grip strength (right)	Vascular dementia	rs56365901	<0.17
