# Supplementary material for: Causal associations between common musculoskeletal disorders and dementia: a Mendelian randomization study
Source: Front Aging Neurosci. 2023 Dec 6;15:1253791. doi: 10.3389/fnagi.2023.1253791 (PMC10731015; doi:10.3389/fnagi.2023.1253791)
Supplement: Supplementary file 6 [file Table_6.XLSX]

## Sheet: Supplementary Table S6
Supplementary Table S6: The sensitivity tests.
Exposure	Outcome	Cochran's Q test		Egger Intercept test		MR-PRESSO
		Q-Egger	P-value	Egger-intercept	P-value	P-value of Global test	P-value of distortion test
All Osteoarthritis	Demnetia with Lewy bodies	13.9809	0.94708	-0.0664309	0.08937	0.886	NA
All Osteoarthritis	Dementia in Alzheimer disease	29.6881	0.195304	-0.039927	0.217966	0.183	NA
All Osteoarthritis	Dementia	21.942	0.402861	-0.0182194	0.314239	0.405	NA
All Osteoarthritis	Unspecified dementia	23.9905	0.462138	-0.00595634	0.856798	0.533	NA
All Osteoarthritis	Vascular dementia	28.6111	0.23511	-0.00248232	0.955346	0.313	NA
All Osteoarthritis	Frontotemporal dementia, wide, incl. Pick's disease	20.5181	0.666966	-0.0457308	0.781897	0.742	NA
KneeHip Osteoarthritis	Dementia with Lewy bodies	17.6246	0.889	-0.0183241	0.723782	0.904	NA
KneeHip Osteoarthritis	Dementia in Alzheimer disease	32.9941	0.197266	-0.023485	0.496629	0.218	NA
KneeHip Osteoarthritis	Dementia	37.8188	0.0807695	-0.0177695	0.422883	0.09	NA
KneeHip Osteoarthritis	Unspecified dementia	29.7314	0.326356	-0.0465511	0.220285	0.298	NA
KneeHip Osteoarthritis	Vascular dementia	18.7321	0.879558	0.00551173	0.900635	0.911	NA
KneeHip Osteoarthritis	Frontotemporal dementia, wide, incl. Pick's disease	20.5564	0.806614	0.185942	0.301466	0.789	NA
Knee Osteoarthritis	Demnetia with Lewy bodies	15.4098	0.752501	0.129646	0.0188859	0.402	NA
Knee Osteoarthritis	Dementia in Alzheimer disease	22.9548	0.522468	-0.035919	0.255025	0.495	NA
Knee Osteoarthritis	Dementia	19.3934	0.559922	-0.0172372	0.395243	0.588	NA
Knee Osteoarthritis	Unspecified dementia	29.0042	0.219971	-0.00338418	0.931223	0.245	NA
Knee Osteoarthritis	Vascular dementia	28.833	0.226479	-0.0239106	0.621883	0.276	NA
Knee Osteoarthritis	Frontotemporal dementia, wide, incl. Pick's disease	32.8048	0.10826	-0.266215	0.209017	0.085	NA
Hip Osteoarthritis	Demnetia with Lewy bodies	21.6549	0.419626	-0.00175958	0.957685	0.49	NA
Hip Osteoarthritis	Dementia in Alzheimer disease	36.3343	0.134281	0.00184779	0.934776	0.164	NA
Hip Osteoarthritis	Dementia	39.8523	0.0681558	-0.00924638	0.513527	0.088	NA
Hip Osteoarthritis	Unspecified dementia	20.4391	0.847934	0.0260619	0.253054	0.83	NA
Hip Osteoarthritis	Vascular dementia	30.2056	0.353455	-0.00408951	0.887678	0.422	NA
Hip Osteoarthritis	Frontotemporal dementia, wide, incl. Pick's disease	20.4747	0.846549	-0.122203	0.291262	0.852	NA
Spine Osteoarthritis	Demnetia with Lewy bodies	17.8224	0.21499	0.00471298	0.899411	0.296	NA
Spine Osteoarthritis	Dementia in Alzheimer disease	19.7114	0.139505	-0.0115439	0.646958	0.174	NA
Spine Osteoarthritis	Dementia	12.5857	0.559374	-0.0125277	0.330824	0.539	NA
Spine Osteoarthritis	Unspecified dementia	14.1248	0.440456	-0.0446686	0.082913	0.291	NA
Spine Osteoarthritis	Vascular dementia	7.06768	0.932071	-0.0170879	0.571692	0.946	NA
Spine Osteoarthritis	Frontotemporal dementia, wide, incl. Pick's disease	7.55938	0.752145	-0.049617	0.703882	0.816	0.094
Rheumatoid arthritis	Demnetia with Lewy bodies	2.56701	0.277064	0.066213	0.473008	0.383	NA
Rheumatoid arthritis	Dementia in Alzheimer disease	2.80995	0.421864	-0.0485931	0.426843	0.561	NA
Rheumatoid arthritis	Dementia	3.43885	0.32878	-0.0214109	0.575464	0.406	NA
Rheumatoid arthritis	Unspecified dementia	1.53947	0.673192	-0.011636	0.860919	0.792	NA
Rheumatoid arthritis	Vascular dementia	1.08273	0.781245	0.0324698	0.694251	0.887	NA
Rheumatoid arthritis	Frontotemporal dementia, wide, incl. Pick's disease	0.427848	0.934432	-0.025922	0.938104	0.984	NA
Seronegative rheumatoid arthritis	Dementia with Lewy bodies	0.00476511	0.944966	NA	NA	NA	NA
Seronegative rheumatoid arthritis	Dementia in Alzheimer disease	2.88559	0.717619	0.00934727	0.704527	0.833	NA
Seronegative rheumatoid arthritis	Dementia	7.91853	0.160783	0.00934553	0.616276	0.248	NA
Seronegative rheumatoid arthritis	Unspecified dementia	8.90311	0.112992	-0.0147207	0.696444	0.216	NA
Seronegative rheumatoid arthritis	Vascular dementia	2.60793	0.76016	-0.0361335	0.324598	0.639	NA
Seronegative rheumatoid arthritis	Frontotemporal dementia, wide, incl. Pick's disease	1.29236	0.935716	0.144634	0.325171	0.841	NA
Seropositive rheumatoid arthritis, wide	Demnetia with Lewy bodies	4.82802	0.939208	-0.0185826	0.514849	0.926	NA
Seropositive rheumatoid arthritis, wide	Dementia in Alzheimer disease	14.9565	0.664952	0.016038	0.164961	0.564	NA
Seropositive rheumatoid arthritis, wide	Dementia	20.4145	0.309975	0.00753247	0.300653	0.367	NA
Seropositive rheumatoid arthritis, wide	Unspecified dementia	13.2041	0.586536	-0.00662345	0.624387	0.625	NA
Seropositive rheumatoid arthritis, wide	Vascular dementia	9.05012	0.95857	0.0260684	0.114684	0.889	NA
Seropositive rheumatoid arthritis, wide	Frontotemporal dementia, wide, incl. Pick's disease	9.11055	0.957127	-0.0414177	0.523206	0.962	NA
Ankylosing spondylitis	Demnetia with Lewy bodies	7.34909	0.289766	-0.00192893	0.966593	0.392	NA
Ankylosing spondylitis	Dementia in Alzheimer disease	7.59548	0.473948	-0.00584855	0.781132	0.587	NA
Ankylosing spondylitis	Dementia	1.83516	0.985655	-0.00333449	0.790833	0.993	NA
Ankylosing spondylitis	Unspecified dementia	6.16606	0.628637	0.0113102	0.640575	0.721	NA
Ankylosing spondylitis	Vascular dementia	3.87376	0.86833	0.0281307	0.357601	0.845	NA
Ankylosing spondylitis	Frontotemporal dementia, wide, incl. Pick's disease	6.85857	0.551967	-0.0680594	0.575353	0.63	NA
Juvenile idiopathic arthritis	Demnetia with Lewy bodies	0.459747	0.497742	-0.032095	0.706071	NA	NA
Juvenile idiopathic arthritis	Dementia in Alzheimer disease	0.779458	0.978325	0.0226157	0.372453	0.938	NA
Juvenile idiopathic arthritis	Dementia	7.9373	0.159725	0.00853746	0.644337	0.241	NA
Juvenile idiopathic arthritis	Unspecified dementia	12.796	0.0253671	-0.0189312	0.672878	0.089	NA
Juvenile idiopathic arthritis	Vascular dementia	2.76986	0.735415	-0.0308374	0.390451	0.623	NA
Juvenile idiopathic arthritis	Frontotemporal dementia, wide, incl. Pick's disease	4.30918	0.505813	0.168017	0.259521	0.475	NA
Gout	Demnetia with Lewy bodies	1.13446	0.888767	0.0855471	0.214049	0.729	NA
Gout	Dementia in Alzheimer disease	5.37304	0.372069	0.0180053	0.564026	0.515	NA
Gout	Dementia	3.16593	0.674422	-0.00839168	0.638239	0.832	NA
Gout	Unspecified dementia	6.70016	0.243911	0.0174363	0.649932	0.356	NA
Gout	Vascular dementia	4.82073	0.438148	-0.0671368	0.146815	0.359	NA
Gout	Frontotemporal dementia, wide, incl. Pick's disease	2.65561	0.752899	-0.111469	0.534007	0.814	NA
Osteoporosis	Dementia with Lewy bodies	3.30194	0.770107	-0.0406403	0.438491	0.792	NA
Osteoporosis	Dementia in Alzheimer disease	6.78794	0.236895	0.0189905	0.631982	0.372	NA
Osteoporosis	Dementia	2.79352	0.731782	0.0151577	0.465746	0.77	NA
Osteoporosis	Unspecified dementia	2.3455	0.799562	0.0702709	0.113912	0.449	NA
Osteoporosis	Vascular dementia	0.803324	0.976821	0.00616182	0.897171	0.992	NA
Osteoporosis	Frontotemporal dementia, wide, incl. Pick's disease	0.988312	0.963503	0.433482	0.063189	0.349	NA
Osteoporosis with pathological fracture	Demnetia with Lewy bodies	11.0456	0.0504827	0.0168661	0.790061	0.18	NA
Osteoporosis with pathological fracture	Dementia in Alzheimer disease	2.17845	0.702976	0.0124023	0.659049	0.822	NA
Osteoporosis with pathological fracture	Dementia	6.96351	0.137829	0.0279817	0.245366	0.2	NA
Osteoporosis with pathological fracture	Unspecified dementia	5.88523	0.207885	0.0439275	0.291903	0.31	NA
Osteoporosis with pathological fracture	Vascular dementia	1.84837	0.763622	-0.0293059	0.47186	0.841	NA
Osteoporosis with pathological fracture	Frontotemporal dementia, wide, incl. Pick's disease	7.51791	0.110922	-0.0789848	0.716413	0.439	NA
Osteomalacia	Demnetia with Lewy bodies	0.535879	0.910941	0.0375452	0.577845	0.914	NA
Osteomalacia	Dementia in Alzheimer disease	4.96318	0.174514	-0.00804482	0.893443	0.334	NA
Osteomalacia	Dementia	3.2982	0.347893	-0.00180153	0.950998	0.523	NA
Osteomalacia	Unspecified dementia	2.20756	0.530462	-0.0722799	0.237502	0.419	NA
Osteomalacia	Vascular dementia	8.79161	0.0321938	0.0403057	0.724134	0.103	NA
Osteomalacia	Frontotemporal dementia, wide, incl. Pick's disease	2.54485	0.467241	0.0776185	0.775172	0.641	NA
Osteonecrosis	Demnetia with Lewy bodies	12.995	0.162833	-0.0116983	0.835747	0.225	NA
Osteonecrosis	Dementia in Alzheimer disease	10.6031	0.303895	-0.0163552	0.622263	0.397	NA
Osteonecrosis	Dementia	10.564	0.306784	-0.0153452	0.441256	0.354	NA
Osteonecrosis	Unspecified dementia	13.0513	0.160299	-0.0519177	0.229342	0.123	NA
Osteonecrosis	Vascular dementia	8.1518	0.518924	-0.0262825	0.542576	0.593	NA
Osteonecrosis	Frontotemporal dementia, wide, incl. Pick's disease	17.2648	0.0447273	0.00384418	0.987313	0.092	NA
Osteomyelitis	Demnetia with Lewy bodies	4.0871	0.769692	-0.00493531	0.914234	0.857	NA
Osteomyelitis	Dementia in Alzheimer disease	7.92474	0.243669	-0.00335598	0.904467	0.412	NA
Osteomyelitis	Dementia	8.76145	0.187445	-0.00323395	0.854261	0.302	NA
Osteomyelitis	Unspecified dementia	3.47445	0.747366	-0.0109867	0.69609	0.831	NA
Osteomyelitis	Vascular dementia	11.2607	0.0806458	-0.0174658	0.713314	0.154	NA
Osteomyelitis	Frontotemporal dementia, wide, incl. Pick's disease	2.72988	0.841906	0.172507	0.238623	0.748	NA
Meniscus derangement	Dementia with Lewy bodies	50.5061	0.0549517	-0.00701545	0.73468	0.075	NA
Meniscus derangement	Dementia in Alzheimer disease	44.6652	0.443695	-0.00471911	0.711115	0.48	NA
Meniscus derangement	Dementia	61.2237	0.043749	-0.0030722	0.730131	0.06	NA
Meniscus derangement	Unspecified dementia	54.461	0.134115	0.000197163	0.990265	0.155	NA
Meniscus derangement	Vascular dementia	42.365	0.541864	-0.0216295	0.23169	0.509	NA
Meniscus derangement	Frontotemporal dementia, wide, incl. Pick's disease	42.155	0.550965	0.0211868	0.770726	0.589	NA
Sciatica	Demnetia with Lewy bodies	4.70243	0.453264	0.00436217	0.942662	0.628	NA
Sciatica	Dementia in Alzheimer disease	9.68974	0.138341	-0.0473827	0.269866	0.107	NA
Sciatica	Dementia	12.3508	0.0545852	-0.0276239	0.335335	0.056	NA
Sciatica	Unspecified dementia	9.66393	0.139537	-0.0643625	0.199877	0.097	NA
Sciatica	Vascular dementia	9.82634	0.132158	-0.00840748	0.885396	0.263	NA
Sciatica	Frontotemporal dementia, wide, incl. Pick's disease	8.82373	0.183737	0.20779	0.362678	0.235	NA
Lateral epicondylitis	Demnetia with Lewy bodies	6.34661	0.385502	-0.0252158	0.514856	0.47	NA
Lateral epicondylitis	Dementia in Alzheimer disease	12.4723	0.131342	-0.0260707	0.457108	0.148	NA
Lateral epicondylitis	Dementia	12.2363	0.140967	-0.0286864	0.175293	0.087	NA
Lateral epicondylitis	Unspecified dementia	10.3117	0.243823	-0.0486713	0.187756	0.179	NA
Lateral epicondylitis	Vascular dementia	13.6249	0.0920827	-0.0228981	0.651319	0.143	NA
Lateral epicondylitis	Frontotemporal dementia, wide, incl. Pick's disease	9.49988	0.301895	-0.113131	0.523788	0.38	NA
Cervical disc disorders	Demnetia with Lewy bodies	0.782486	0.676216	-0.164147	0.361799	0.597	NA
Cervical disc disorders	Dementia in Alzheimer disease	0.723887	0.696322	-0.0887756	0.423576	0.666	NA
Cervical disc disorders	Dementia	1.30401	0.521	-0.0407547	0.523736	0.634	NA
Cervical disc disorders	Unspecified dementia	6.52972	0.0382022	-0.0405727	0.845803	0.154	NA
Cervical disc disorders	Vascular dementia	0.346401	0.840969	-0.222682	0.218945	0.391	NA
Cervical disc disorders	Frontotemporal dementia, wide, incl. Pick's disease	4.08588	0.129647	0.674426	0.453342	0.192	NA
Muscle wasting and atrophy	Dementia with Lewy bodies	0.0792824	0.778272	NA	NA	NA	NA
Muscle wasting and atrophy	Dementia in Alzheimer disease	2.35449	0.308126	-0.0523634	0.598727	0.447	NA
Muscle wasting and atrophy	Dementia	3.1331	0.208764	0.0334138	0.625979	0.37	NA
Muscle wasting and atrophy	Unspecified dementia	1.32007	0.516833	0.0503686	0.629388	0.683	NA
Muscle wasting and atrophy	Vascular dementia	0.0775928	0.961947	0.173769	0.249833	0.584	NA
Muscle wasting and atrophy	Frontotemporal dementia, wide, incl. Pick's disease	3.53386	0.170857	0.695138	0.375761	0.229	NA
Hand grip strength (right)	Dementia with Lewy bodies	167.29	0.0352808	-0.0112694	0.445051	0.039	NA
Hand grip strength (right)	Dementia in Alzheimer disease	205.853	0.00238722	0.0243763	0.00835118	0.001	NA
Hand grip strength (right)	Dementia	210.787	0.00228874	0.00821345	0.131756	0.002	NA
Hand grip strength (right)	Unspecified dementia	188.147	0.0509613	0.0177523	0.0700262	0.04	NA
Hand grip strength (right)	Vascular dementia	193.146	0.0297914	0.00589236	0.627943	0.028	NA
Hand grip strength (right)	Frontotemporal dementia, wide, incl. Pick's disease	149.38	0.675918	-0.0115161	0.796897	0.697	NA
Hand grip strength (left)	Dementia with Lewy bodies	154.091	0.0916105	-0.0330054	0.0339667	0.06	NA
Hand grip strength (left)	Dementia in Alzheimer disease	152.724	0.116104	0.0210995	0.0237794	0.075	NA
Hand grip strength (left)	Dementia	174.283	0.0110174	0.013177	0.0253593	0.002	NA
Hand grip strength (left)	Unspecified dementia	157.16	0.103503	0.0180206	0.0889984	0.098	NA
Hand grip strength (left)	Vascular dementia	153.953	0.139173	-0.000428913	0.973459	0.154	NA
Hand grip strength (left)	Frontotemporal dementia, wide, incl. Pick's disease	154.091	0.0916105	-0.0330054	0.0339667	0.06	NA
Usual walking pace	Dementia with Lewy bodies	2.6596	0.999971	0.00751047	0.860067	0.21	NA
Usual walking pace	Dementia in Alzheimer disease	41.0877	0.714934	-0.0282237	0.0798115	0.627	NA
Usual walking pace	Dementia	48.8378	0.217424	-0.00505967	0.631582	0.023	NA
Usual walking pace	Unspecified dementia	60.6676	0.122537	-0.00765452	0.694897	0.159	NA
Usual walking pace	Vascular dementia	42.3426	0.665606	-0.0554152	0.0168661	50.621	NA
Usual walking pace	Frontotemporal dementia, wide, incl. Pick's disease	40.2662	0.745729	0.0115584	0.898484	42.001	NA
Physical activity	Dementia with Lewy bodies	18.5365	0.96221	0.00908026	0.768415	54.32	NA
Physical activity	Dementia in Alzheimer disease	36.1304	0.462556	0.0262655	0.173092	40.227	NA
Physical activity	Dementia	47.4092	0.14089	-0.00442803	0.721459	49.98	NA
Physical activity	Unspecified dementia	36.7846	0.571354	0.021917	0.306179	39.715	NA
Physical activity	Vascular dementia	43.0759	0.301083	0.00638234	0.816977	45.301	NA
Physical activity	Frontotemporal dementia, wide, incl. Pick's disease	31.0114	0.8154	-0.142448	0.181917	34.446	NA
