# Supplementary material for: Causal associations between common musculoskeletal disorders and dementia: a Mendelian randomization study
Source: Front Aging Neurosci. 2023 Dec 6;15:1253791. doi: 10.3389/fnagi.2023.1253791 (PMC10731015; doi:10.3389/fnagi.2023.1253791)
Supplement: Supplementary file 7 [file Table_7.XLSX]

## Sheet: Supplementary Table S7
Supplementary Table S7: The causal estimates obtained by five MR methods.
Exposure	Outcome	SNP(n)	Method	P-value	OR(95%CI)
All Osteoarthritis	Dementia with Lewy bodies	26	Inverse variance weighted	0.43122	1.227(0.738-2.040)
All Osteoarthritis	Dementia with Lewy bodies	26	MR Egger	0.0697462	9.865(0.928-104.845)
All Osteoarthritis	Dementia with Lewy bodies	26	Weighted median	0.466398	1.271(0.667-2.420)
All Osteoarthritis	Dementia with Lewy bodies	26	Weighted mode	0.674978	1.300(0.387-4.368)
All Osteoarthritis	Dementia with Lewy bodies	26	Simple mode	0.785943	1.198(0.331-4.338)
All Osteoarthritis	Dementia in Alzheimer disease	26	Inverse variance weighted	0.197833	0.786(0.545-1.134)
All Osteoarthritis	Dementia in Alzheimer disease	26	MR Egger	0.321902	2.842(0.375-21.521)
All Osteoarthritis	Dementia in Alzheimer disease	26	Weighted median	0.517861	0.850(0.520-1.390)
All Osteoarthritis	Dementia in Alzheimer disease	26	Weighted mode	0.9282	0.958(0.385-2.389)
All Osteoarthritis	Dementia in Alzheimer disease	26	Simple mode	0.93368	0.958(0.356-2.577)
All Osteoarthritis	Dementia	23	Inverse variance weighted	0.0504	0.810(0.656-1.000)
All Osteoarthritis	Dementia	23	MR Egger	0.52545	1.449(0.470-4.471)
All Osteoarthritis	Dementia	23	Weighted median	0.558795	0.913(0.672-1.240)
All Osteoarthritis	Dementia	23	Weighted mode	0.949185	0.980(0.533-1.803)
All Osteoarthritis	Dementia	23	Simple mode	0.896676	0.962(0.537-1.723)
All Osteoarthritis	Unspecified dementia	26	Inverse variance weighted	0.148642	0.759(0.523-1.103)
All Osteoarthritis	Unspecified dementia	26	MR Egger	0.93851	0.920(0.113-7.477)
All Osteoarthritis	Unspecified dementia	26	Weighted median	0.276762	0.736(0.423-1.279)
All Osteoarthritis	Unspecified dementia	26	Weighted mode	0.625534	0.777(0.285-2.118)
All Osteoarthritis	Unspecified dementia	26	Simple mode	0.634365	0.777(0.277-2.174)
All Osteoarthritis	Vascular dementia	26	Inverse variance weighted	0.0584002	0.620(0.379-1.017)
All Osteoarthritis	Vascular dementia	26	MR Egger	0.784373	0.672(0.040-11.212)
All Osteoarthritis	Vascular dementia	26	Weighted median	0.38429	0.748(0.389-1.439)
All Osteoarthritis	Vascular dementia	26	Weighted mode	0.78656	0.847(0.259-2.774)
All Osteoarthritis	Vascular dementia	26	Simple mode	0.0665535	0.281(0.077-1.028)
All Osteoarthritis	Frontotemporal dementia, wide, incl. Pick's disease	26	Inverse variance weighted	0.885219	0.871(0.134-5.652)
All Osteoarthritis	Frontotemporal dementia, wide, incl. Pick's disease	26	MR Egger	0.804924	3.801(<0.001-135334.738)
All Osteoarthritis	Frontotemporal dementia, wide, incl. Pick's disease	26	Weighted median	0.566921	0.454(0.030-6.771)
All Osteoarthritis	Frontotemporal dementia, wide, incl. Pick's disease	26	Weighted mode	0.695832	0.341(0.002-70.477)
All Osteoarthritis	Frontotemporal dementia, wide, incl. Pick's disease	26	Simple mode	0.633402	0.286(0.002-45.980)
KneeHip Osteoarthritis	Dementia with Lewy bodies	28	Inverse variance weighted	0.241045	0.813(0.574-1.150)
KneeHip Osteoarthritis	Dementia with Lewy bodies	28	MR Egger	0.86293	1.224(0.126-11.918)
KneeHip Osteoarthritis	Dementia with Lewy bodies	28	Weighted median	0.976448	1.007(0.622-1.632)
KneeHip Osteoarthritis	Dementia with Lewy bodies	28	Weighted mode	0.488505	1.347(0.587-3.092)
KneeHip Osteoarthritis	Dementia with Lewy bodies	28	Simple mode	0.535362	1.333(0.543-3.271)
KneeHip Osteoarthritis	Dementia in Alzheimer disease	29	Inverse variance weighted	0.226064	0.865(0.684-1.094)
KneeHip Osteoarthritis	Dementia in Alzheimer disease	29	MR Egger	0.624614	1.471(0.319-6.790)
KneeHip Osteoarthritis	Dementia in Alzheimer disease	29	Weighted median	0.304799	0.846(0.615-1.164)
KneeHip Osteoarthritis	Dementia in Alzheimer disease	29	Weighted mode	0.718567	0.897(0.500-1.610)
KneeHip Osteoarthritis	Dementia in Alzheimer disease	29	Simple mode	0.830093	0.929(0.479-1.803)
KneeHip Osteoarthritis	Dementia	29	Inverse variance weighted	0.127548	0.889(0.765-1.034)
KneeHip Osteoarthritis	Dementia	29	MR Egger	0.573892	1.329(0.499-3.540)
KneeHip Osteoarthritis	Dementia	29	Weighted median	0.325848	0.909(0.752-1.099)
KneeHip Osteoarthritis	Dementia	29	Weighted mode	0.759824	0.950(0.685-1.318)
KneeHip Osteoarthritis	Dementia	29	Simple mode	0.847358	0.965(0.677-1.376)
KneeHip Osteoarthritis	Unspecified dementia	29	Inverse variance weighted	0.0338335	0.754(0.581-0.979)
KneeHip Osteoarthritis	Unspecified dementia	29	MR Egger	0.372031	2.162(0.409-11.420)
KneeHip Osteoarthritis	Unspecified dementia	29	Weighted median	0.0513754	0.697(0.485-1.002)
KneeHip Osteoarthritis	Unspecified dementia	29	Weighted mode	0.18628	0.585(0.270-1.270)
KneeHip Osteoarthritis	Unspecified dementia	29	Simple mode	0.14554	0.565(0.267-1.193)
KneeHip Osteoarthritis	Vascular dementia	29	Inverse variance weighted	0.0164353	0.689(0.509-0.934)
KneeHip Osteoarthritis	Vascular dementia	29	MR Egger	0.623865	0.609(0.086-4.330)
KneeHip Osteoarthritis	Vascular dementia	29	Weighted median	0.247773	0.786(0.523-1.182)
KneeHip Osteoarthritis	Vascular dementia	29	Weighted mode	0.540843	0.800(0.394-1.622)
KneeHip Osteoarthritis	Vascular dementia	29	Simple mode	0.649469	0.831(0.377-1.831)
KneeHip Osteoarthritis	Frontotemporal dementia, wide, incl. Pick's disease	29	Inverse variance weighted	0.607586	1.379(0.404-4.709)
KneeHip Osteoarthritis	Frontotemporal dementia, wide, incl. Pick's disease	29	MR Egger	0.345047	0.021(0.000-56.513)
KneeHip Osteoarthritis	Frontotemporal dementia, wide, incl. Pick's disease	29	Weighted median	0.518588	1.769(0.313-10.005)
KneeHip Osteoarthritis	Frontotemporal dementia, wide, incl. Pick's disease	29	Weighted mode	0.508477	0.296(0.008-10.447)
KneeHip Osteoarthritis	Frontotemporal dementia, wide, incl. Pick's disease	29	Simple mode	0.564082	2.926(0.080-107.559)
Knee Osteoarthritis	Dementia with Lewy bodies	22	Inverse variance weighted	0.904095	0.979(0.696-1.377)
Knee Osteoarthritis	Dementia with Lewy bodies	22	MR Egger	0.0195883	0.082(0.012-0.565)
Knee Osteoarthritis	Dementia with Lewy bodies	22	Weighted median	0.8482	0.953(0.584-1.557)
Knee Osteoarthritis	Dementia with Lewy bodies	22	Weighted mode	0.251197	0.593(0.249-1.413)
Knee Osteoarthritis	Dementia with Lewy bodies	22	Simple mode	0.208136	1.916(0.718-5.110)
Knee Osteoarthritis	Dementia in Alzheimer disease	26	Inverse variance weighted	0.282541	0.899(0.741-1.091)
Knee Osteoarthritis	Dementia in Alzheimer disease	26	MR Egger	0.340294	1.790(0.554-5.784)
Knee Osteoarthritis	Dementia in Alzheimer disease	26	Weighted median	0.87794	0.978(0.733-1.305)
Knee Osteoarthritis	Dementia in Alzheimer disease	26	Weighted mode	0.719109	1.084(0.701-1.678)
Knee Osteoarthritis	Dementia in Alzheimer disease	26	Simple mode	0.781596	1.077(0.641-1.810)
Knee Osteoarthritis	Dementia	23	Inverse variance weighted	0.377002	0.947(0.838-1.069)
Knee Osteoarthritis	Dementia	23	MR Egger	0.484625	1.309(0.624-2.747)
Knee Osteoarthritis	Dementia	23	Weighted median	0.696428	0.966(0.811-1.150)
Knee Osteoarthritis	Dementia	23	Weighted mode	0.887069	1.021(0.772-1.350)
Knee Osteoarthritis	Dementia	23	Simple mode	0.856896	1.030(0.750-1.414)
Knee Osteoarthritis	Unspecified dementia	26	Inverse variance weighted	0.724825	0.958(0.755-1.216)
Knee Osteoarthritis	Unspecified dementia	26	MR Egger	0.97699	1.022(0.233-4.480)
Knee Osteoarthritis	Unspecified dementia	26	Weighted median	0.74935	0.950(0.691-1.305)
Knee Osteoarthritis	Unspecified dementia	26	Weighted mode	0.990038	1.005(0.496-2.034)
Knee Osteoarthritis	Unspecified dementia	26	Simple mode	0.974849	0.989(0.486-2.013)
Knee Osteoarthritis	Vascular dementia	26	Inverse variance weighted	0.157624	0.808(0.601-1.086)
Knee Osteoarthritis	Vascular dementia	26	MR Egger	0.794533	1.277(0.207-7.902)
Knee Osteoarthritis	Vascular dementia	26	Weighted median	0.220279	0.778(0.521-1.162)
Knee Osteoarthritis	Vascular dementia	26	Weighted mode	0.332606	0.718(0.372-1.385)
Knee Osteoarthritis	Vascular dementia	26	Simple mode	0.344964	0.703(0.343-1.441)
Knee Osteoarthritis	Frontotemporal dementia, wide, incl. Pick's disease	26	Inverse variance weighted	0.342401	0.529(0.142-1.968)
Knee Osteoarthritis	Frontotemporal dementia, wide, incl. Pick's disease	26	MR Egger	0.27617	86.630(0.034-221726.253)
Knee Osteoarthritis	Frontotemporal dementia, wide, incl. Pick's disease	26	Weighted median	0.11276	0.264(0.051-1.369)
Knee Osteoarthritis	Frontotemporal dementia, wide, incl. Pick's disease	26	Weighted mode	0.262102	0.194(0.012-3.192)
Knee Osteoarthritis	Frontotemporal dementia, wide, incl. Pick's disease	26	Simple mode	0.258625	0.131(0.004-4.114)
Hip Osteoarthritis	Dementia with Lewy bodies	23	Inverse variance weighted	0.988415	1.002(0.778-1.290)
Hip Osteoarthritis	Dementia with Lewy bodies	23	MR Egger	0.956234	1.026(0.420-2.506)
Hip Osteoarthritis	Dementia with Lewy bodies	23	Weighted median	0.619004	1.095(0.765-1.568)
Hip Osteoarthritis	Dementia with Lewy bodies	23	Weighted mode	0.522118	1.246(0.642-2.420)
Hip Osteoarthritis	Dementia with Lewy bodies	23	Simple mode	0.445609	1.314(0.660-2.615)
Hip Osteoarthritis	Dementia in Alzheimer disease	30	Inverse variance weighted	0.00682612	0.804(0.686-0.942)
Hip Osteoarthritis	Dementia in Alzheimer disease	30	MR Egger	0.446935	0.784(0.422-1.455)
Hip Osteoarthritis	Dementia in Alzheimer disease	30	Weighted median	0.0114143	0.764(0.620-0.941)
Hip Osteoarthritis	Dementia in Alzheimer disease	30	Weighted mode	0.202743	0.749(0.486-1.156)
Hip Osteoarthritis	Dementia in Alzheimer disease	30	Simple mode	0.786296	1.068(0.668-1.706)
Hip Osteoarthritis	Dementia	30	Inverse variance weighted	0.0302126	0.895(0.810-0.989)
Hip Osteoarthritis	Dementia	30	MR Egger	0.938091	1.016(0.690-1.494)
Hip Osteoarthritis	Dementia	30	Weighted median	0.399024	0.948(0.836-1.074)
Hip Osteoarthritis	Dementia	30	Weighted mode	0.740002	1.042(0.819-1.326)
Hip Osteoarthritis	Dementia	30	Simple mode	0.650753	1.066(0.812-1.399)
Hip Osteoarthritis	Unspecified dementia	30	Inverse variance weighted	0.00208524	0.776(0.660-0.912)
Hip Osteoarthritis	Unspecified dementia	30	MR Egger	0.0633952	0.544(0.294-1.008)
Hip Osteoarthritis	Unspecified dementia	30	Weighted median	0.0369558	0.783(0.623-0.985)
Hip Osteoarthritis	Unspecified dementia	30	Weighted mode	0.206019	0.767(0.513-1.146)
Hip Osteoarthritis	Unspecified dementia	30	Simple mode	0.202421	0.742(0.474-1.162)
Hip Osteoarthritis	Vascular dementia	30	Inverse variance weighted	0.0431451	0.810(0.660-0.994)
Hip Osteoarthritis	Vascular dementia	30	MR Egger	0.704057	0.856(0.388-1.891)
Hip Osteoarthritis	Vascular dementia	30	Weighted median	0.43534	0.893(0.673-1.186)
Hip Osteoarthritis	Vascular dementia	30	Weighted mode	0.979093	0.993(0.611-1.615)
Hip Osteoarthritis	Vascular dementia	30	Simple mode	0.196534	0.689(0.396-1.197)
Hip Osteoarthritis	Frontotemporal dementia, wide, incl. Pick's disease	30	Inverse variance weighted	0.115763	1.916(0.852-4.309)
Hip Osteoarthritis	Frontotemporal dementia, wide, incl. Pick's disease	30	MR Egger	0.159639	10.150(0.438-235.449)
Hip Osteoarthritis	Frontotemporal dementia, wide, incl. Pick's disease	30	Weighted median	0.438525	1.560(0.506-4.809)
Hip Osteoarthritis	Frontotemporal dementia, wide, incl. Pick's disease	30	Weighted mode	0.465428	2.088(0.297-14.680)
Hip Osteoarthritis	Frontotemporal dementia, wide, incl. Pick's disease	30	Simple mode	0.441738	2.323(0.279-19.307)
Spine Osteoarthritis	Dementia with Lewy bodies	16	Inverse variance weighted	0.591914	0.903(0.621-1.312)
Spine Osteoarthritis	Dementia with Lewy bodies	16	MR Egger	0.756056	0.849(0.308-2.338)
Spine Osteoarthritis	Dementia with Lewy bodies	16	Weighted median	0.462068	1.198(0.741-1.937)
Spine Osteoarthritis	Dementia with Lewy bodies	16	Weighted mode	0.637343	1.206(0.563-2.583)
Spine Osteoarthritis	Dementia with Lewy bodies	16	Simple mode	0.673978	1.218(0.494-3.001)
Spine Osteoarthritis	Dementia in Alzheimer disease	16	Inverse variance weighted	0.216105	1.166(0.914-1.489)
Spine Osteoarthritis	Dementia in Alzheimer disease	16	MR Egger	0.389254	1.351(0.696-2.620)
Spine Osteoarthritis	Dementia in Alzheimer disease	16	Weighted median	0.564859	1.097(0.800-1.506)
Spine Osteoarthritis	Dementia in Alzheimer disease	16	Weighted mode	0.972439	0.989(0.543-1.803)
Spine Osteoarthritis	Dementia in Alzheimer disease	16	Simple mode	0.978211	1.008(0.560-1.815)
Spine Osteoarthritis	Dementia	16	Inverse variance weighted	0.671183	1.028(0.906-1.166)
Spine Osteoarthritis	Dementia	16	MR Egger	0.29278	1.205(0.863-1.683)
Spine Osteoarthritis	Dementia	16	Weighted median	0.431636	1.073(0.901-1.278)
Spine Osteoarthritis	Dementia	16	Weighted mode	0.682086	1.070(0.779-1.469)
Spine Osteoarthritis	Dementia	16	Simple mode	0.748644	1.056(0.762-1.462)
Spine Osteoarthritis	Unspecified dementia	16	Inverse variance weighted	0.504433	1.094(0.841-1.422)
Spine Osteoarthritis	Unspecified dementia	16	MR Egger	0.0651272	1.928(1.014-3.667)
Spine Osteoarthritis	Unspecified dementia	16	Weighted median	0.158179	1.283(0.908-1.815)
Spine Osteoarthritis	Unspecified dementia	16	Weighted mode	0.239224	1.429(0.807-2.528)
Spine Osteoarthritis	Unspecified dementia	16	Simple mode	0.293408	1.440(0.747-2.776)
Spine Osteoarthritis	Vascular dementia	16	Inverse variance weighted	0.654443	1.071(0.794-1.445)
Spine Osteoarthritis	Vascular dementia	16	MR Egger	0.492234	1.331(0.602-2.943)
Spine Osteoarthritis	Vascular dementia	16	Weighted median	0.516053	1.143(0.763-1.711)
Spine Osteoarthritis	Vascular dementia	16	Weighted mode	0.396587	1.334(0.699-2.545)
Spine Osteoarthritis	Vascular dementia	16	Simple mode	0.349212	0.697(0.336-1.448)
Spine Osteoarthritis	Frontotemporal dementia, wide, incl. Pick's disease	13	Inverse variance weighted	0.299797	2.019(0.535-7.622)
Spine Osteoarthritis	Frontotemporal dementia, wide, incl. Pick's disease	13	MR Egger	0.470647	3.912(0.109-140.143)
Spine Osteoarthritis	Frontotemporal dementia, wide, incl. Pick's disease	13	Weighted median	0.340428	2.428(0.392-15.051)
Spine Osteoarthritis	Frontotemporal dementia, wide, incl. Pick's disease	13	Weighted mode	0.430669	3.025(0.212-43.243)
Spine Osteoarthritis	Frontotemporal dementia, wide, incl. Pick's disease	13	Simple mode	0.462563	3.100(0.167-57.582)
Rheumatoid arthritis	Dementia with Lewy bodies	4	Inverse variance weighted	0.690164	0.964 (0.804-1.155)
Rheumatoid arthritis	Dementia with Lewy bodies	4	MR Egger	0.441231	0.827 (0.560-1.222)
Rheumatoid arthritis	Dementia with Lewy bodies	4	Weighted median	0.904457	0.987 (0.797-1.222)
Rheumatoid arthritis	Dementia with Lewy bodies	4	Weighted mode	0.728007	1.064 (0.775-1.460)
Rheumatoid arthritis	Dementia with Lewy bodies	4	Simple mode	0.553614	1.121 (0.801-1.567)
Rheumatoid arthritis	Dementia in Alzheimer disease	5	Inverse variance weighted	0.744589	0.984 (0.892-1.085)
Rheumatoid arthritis	Dementia in Alzheimer disease	5	MR Egger	0.510122	1.112 (0.841-1.471)
Rheumatoid arthritis	Dementia in Alzheimer disease	5	Weighted median	0.586931	0.967 (0.859-1.090)
Rheumatoid arthritis	Dementia in Alzheimer disease	5	Weighted mode	0.417984	0.942 (0.829-1.072)
Rheumatoid arthritis	Dementia in Alzheimer disease	5	Simple mode	0.278254	0.907 (0.778-1.057)
Rheumatoid arthritis	Dementia	5	Inverse variance weighted	0.489722	0.980 (0.924-1.039)
Rheumatoid arthritis	Dementia	5	MR Egger	0.739742	1.034 (0.863-1.239)
Rheumatoid arthritis	Dementia	5	Weighted median	0.697155	0.985 (0.911-1.064)
Rheumatoid arthritis	Dementia	5	Weighted mode	0.202747	0.924 (0.835-1.023)
Rheumatoid arthritis	Dementia	5	Simple mode	0.273115	0.924 (0.819-1.044)
Rheumatoid arthritis	Unspecified dementia	5	Inverse variance weighted	0.0020005	0.838 (0.749-0.937)
Rheumatoid arthritis	Unspecified dementia	5	MR Egger	0.435375	0.863 (0.625-1.191)
Rheumatoid arthritis	Unspecified dementia	5	Weighted median	0.00939541	0.840 (0.736-0.958)
Rheumatoid arthritis	Unspecified dementia	5	Weighted mode	0.120695	0.860 (0.739-1.000)
Rheumatoid arthritis	Unspecified dementia	5	Simple mode	0.133366	0.838 (0.697-1.008)
Rheumatoid arthritis	Vascular dementia	5	Inverse variance weighted	0.429759	0.946 (0.824-1.086)
Rheumatoid arthritis	Vascular dementia	5	MR Egger	0.544141	0.872 (0.587-1.293)
Rheumatoid arthritis	Vascular dementia	5	Weighted median	0.452019	0.937 (0.790-1.110)
Rheumatoid arthritis	Vascular dementia	5	Weighted mode	0.57834	0.943 (0.778-1.142)
Rheumatoid arthritis	Vascular dementia	5	Simple mode	0.717013	0.959 (0.778-1.183)
Rheumatoid arthritis	Frontotemporal dementia, wide, incl. Pick's disease	5	Inverse variance weighted	0.0450463	0.565 (0.323-0.987)
Rheumatoid arthritis	Frontotemporal dementia, wide, incl. Pick's disease	5	MR Egger	0.583972	0.603 (0.119-3.048)
Rheumatoid arthritis	Frontotemporal dementia, wide, incl. Pick's disease	5	Weighted median	0.0985801	0.588 (0.314-1.104)
Rheumatoid arthritis	Frontotemporal dementia, wide, incl. Pick's disease	5	Weighted mode	0.222868	0.585 (0.282-1.213)
Rheumatoid arthritis	Frontotemporal dementia, wide, incl. Pick's disease	5	Simple mode	0.301975	0.576 (0.231-1.436)
Seropositive rheumatoid arthritis, wide	Dementia with Lewy bodies	13	Inverse variance weighted	0.869739	0.987(0.845-1.153)
Seropositive rheumatoid arthritis, wide	Dementia with Lewy bodies	13	MR Egger	0.63124	1.079(0.797-1.462)
Seropositive rheumatoid arthritis, wide	Dementia with Lewy bodies	13	Weighted median	0.603286	0.946(0.766-1.167)
Seropositive rheumatoid arthritis, wide	Dementia with Lewy bodies	13	Weighted mode	0.533438	0.925(0.728-1.175)
Seropositive rheumatoid arthritis, wide	Dementia with Lewy bodies	13	Simple mode	0.672637	0.927(0.657-1.307)
Seropositive rheumatoid arthritis, wide	Dementia in Alzheimer disease	20	Inverse variance weighted	0.174787	1.040(0.983-1.100)
Seropositive rheumatoid arthritis, wide	Dementia in Alzheimer disease	20	MR Egger	0.729161	0.983(0.894-1.081)
Seropositive rheumatoid arthritis, wide	Dementia in Alzheimer disease	20	Weighted median	0.956503	1.002(0.926-1.085)
Seropositive rheumatoid arthritis, wide	Dementia in Alzheimer disease	20	Weighted mode	0.800046	1.010(0.933-1.094)
Seropositive rheumatoid arthritis, wide	Dementia in Alzheimer disease	20	Simple mode	0.430272	1.054(0.927-1.199)
Seropositive rheumatoid arthritis, wide	Dementia	20	Inverse variance weighted	0.127599	1.029(0.992-1.066)
Seropositive rheumatoid arthritis, wide	Dementia	20	MR Egger	0.956102	1.002(0.943-1.064)
Seropositive rheumatoid arthritis, wide	Dementia	20	Weighted median	0.31422	1.023(0.978-1.070)
Seropositive rheumatoid arthritis, wide	Dementia	20	Weighted mode	0.421893	1.021(0.972-1.072)
Seropositive rheumatoid arthritis, wide	Dementia	20	Simple mode	0.552106	1.024(0.949-1.105)
Seropositive rheumatoid arthritis, wide	Unspecified dementia	17	Inverse variance weighted	0.912626	0.996(0.930-1.067)
Seropositive rheumatoid arthritis, wide	Unspecified dementia	17	MR Egger	0.751948	1.018(0.912-1.136)
Seropositive rheumatoid arthritis, wide	Unspecified dementia	17	Weighted median	0.512064	0.968(0.880-1.066)
Seropositive rheumatoid arthritis, wide	Unspecified dementia	17	Weighted mode	0.435171	0.959(0.865-1.063)
Seropositive rheumatoid arthritis, wide	Unspecified dementia	17	Simple mode	0.619649	1.048(0.874-1.256)
Seropositive rheumatoid arthritis, wide	Vascular dementia	20	Inverse variance weighted	0.760618	1.013(0.934-1.097)
Seropositive rheumatoid arthritis, wide	Vascular dementia	20	MR Egger	0.265925	0.924(0.808-1.057)
Seropositive rheumatoid arthritis, wide	Vascular dementia	20	Weighted median	0.778924	0.984(0.881-1.100)
Seropositive rheumatoid arthritis, wide	Vascular dementia	20	Weighted mode	0.639768	0.972(0.866-1.092)
Seropositive rheumatoid arthritis, wide	Vascular dementia	20	Simple mode	0.890543	0.986(0.813-1.196)
Seropositive rheumatoid arthritis, wide	Frontotemporal dementia, wide, incl. Pick's disease	20	Inverse variance weighted	0.068708	0.740(0.535-1.023)
Seropositive rheumatoid arthritis, wide	Frontotemporal dementia, wide, incl. Pick's disease	20	MR Egger	0.582935	0.856(0.496-1.477)
Seropositive rheumatoid arthritis, wide	Frontotemporal dementia, wide, incl. Pick's disease	20	Weighted median	0.481873	0.854(0.551-1.325)
Seropositive rheumatoid arthritis, wide	Frontotemporal dementia, wide, incl. Pick's disease	20	Weighted mode	0.558216	0.870(0.549-1.377)
Seropositive rheumatoid arthritis, wide	Frontotemporal dementia, wide, incl. Pick's disease	20	Simple mode	0.285397	0.668(0.326-1.371)
Seronegative rheumatoid arthritis	Dementia with Lewy bodies	2	Inverse variance weighted	0.898839	0.975(0.659-1.442)
Seronegative rheumatoid arthritis	Dementia in Alzheimer disease	7	Inverse variance weighted	0.955294	0.998(0.928-1.073)
Seronegative rheumatoid arthritis	Dementia in Alzheimer disease	7	MR Egger	0.718247	0.970(0.829-1.135)
Seronegative rheumatoid arthritis	Dementia in Alzheimer disease	7	Weighted median	0.63189	0.979(0.897-1.068)
Seronegative rheumatoid arthritis	Dementia in Alzheimer disease	7	Weighted mode	0.660863	0.977(0.883-1.080)
Seronegative rheumatoid arthritis	Dementia in Alzheimer disease	7	Simple mode	0.719983	0.977(0.863-1.105)
Seronegative rheumatoid arthritis	Dementia	7	Inverse variance weighted	0.586356	1.014(0.964-1.068)
Seronegative rheumatoid arthritis	Dementia	7	MR Egger	0.823047	0.986(0.876-1.109)
Seronegative rheumatoid arthritis	Dementia	7	Weighted median	0.502202	1.020(0.963-1.081)
Seronegative rheumatoid arthritis	Dementia	7	Weighted mode	0.57843	1.021(0.954-1.092)
Seronegative rheumatoid arthritis	Dementia	7	Simple mode	0.216416	1.070(0.972-1.179)
Seronegative rheumatoid arthritis	Unspecified dementia	7	Inverse variance weighted	0.909732	1.006(0.907-1.115)
Seronegative rheumatoid arthritis	Unspecified dementia	7	MR Egger	0.6954	1.052(0.828-1.336)
Seronegative rheumatoid arthritis	Unspecified dementia	7	Weighted median	0.140927	1.092(0.971-1.228)
Seronegative rheumatoid arthritis	Unspecified dementia	7	Weighted mode	0.187446	1.122(0.964-1.306)
Seronegative rheumatoid arthritis	Unspecified dementia	7	Simple mode	0.341961	1.117(0.905-1.380)
Seronegative rheumatoid arthritis	Vascular dementia	7	Inverse variance weighted	0.97842	1.001(0.903-1.110)
Seronegative rheumatoid arthritis	Vascular dementia	7	MR Egger	0.372018	1.118(0.895-1.397)
Seronegative rheumatoid arthritis	Vascular dementia	7	Weighted median	0.685039	0.972(0.846-1.116)
Seronegative rheumatoid arthritis	Vascular dementia	7	Weighted mode	0.573644	0.947(0.790-1.134)
Seronegative rheumatoid arthritis	Vascular dementia	7	Simple mode	0.571256	0.936(0.754-1.162)
Seronegative rheumatoid arthritis	Frontotemporal dementia, wide, incl. Pick's disease	7	Inverse variance weighted	0.00534596	0.554(0.366-0.840)
Seronegative rheumatoid arthritis	Frontotemporal dementia, wide, incl. Pick's disease	7	MR Egger	0.0733586	0.357(0.146-0.872)
Seronegative rheumatoid arthritis	Frontotemporal dementia, wide, incl. Pick's disease	7	Weighted median	0.0597387	0.598(0.350-1.021)
Seronegative rheumatoid arthritis	Frontotemporal dementia, wide, incl. Pick's disease	7	Weighted mode	0.218984	0.649(0.351-1.203)
Seronegative rheumatoid arthritis	Frontotemporal dementia, wide, incl. Pick's disease	7	Simple mode	0.32103	0.640(0.285-1.438)
Ankylosing spondylitis	Dementia with Lewy bodies	8	Inverse variance weighted	0.0462433	1.041(1.001-1.082)
Ankylosing spondylitis	Dementia with Lewy bodies	8	MR Egger	0.27682	1.042(0.974-1.115)
Ankylosing spondylitis	Dementia with Lewy bodies	8	Weighted median	0.265626	1.030(0.978-1.085)
Ankylosing spondylitis	Dementia with Lewy bodies	8	Weighted mode	0.545915	1.023(0.954-1.096)
Ankylosing spondylitis	Dementia with Lewy bodies	8	Simple mode	0.474889	1.034(0.947-1.129)
Ankylosing spondylitis	Dementia in Alzheimer disease	10	Inverse variance weighted	0.0266963	1.026(1.003-1.049)
Ankylosing spondylitis	Dementia in Alzheimer disease	10	MR Egger	0.13491	1.030(0.995-1.065)
Ankylosing spondylitis	Dementia in Alzheimer disease	10	Weighted median	0.0111676	1.040(1.009-1.072)
Ankylosing spondylitis	Dementia in Alzheimer disease	10	Weighted mode	0.0483671	1.040(1.005-1.075)
Ankylosing spondylitis	Dementia in Alzheimer disease	10	Simple mode	0.15615	1.040(0.990-1.093)
Ankylosing spondylitis	Dementia	10	Inverse variance weighted	0.0490704	1.013(1.001-1.027)
Ankylosing spondylitis	Dementia	10	MR Egger	0.174376	1.016(0.995-1.037)
Ankylosing spondylitis	Dementia	10	Weighted median	0.0495369	1.017(1.000-1.035)
Ankylosing spondylitis	Dementia	10	Weighted mode	0.0880419	1.018(1.000-1.037)
Ankylosing spondylitis	Dementia	10	Simple mode	0.219084	1.017(0.992-1.042)
Ankylosing spondylitis	Unspecified dementia	10	Inverse variance weighted	0.467931	1.009(0.984-1.036)
Ankylosing spondylitis	Unspecified dementia	10	MR Egger	0.919021	1.002(0.964-1.042)
Ankylosing spondylitis	Unspecified dementia	10	Weighted median	0.295711	1.018(0.985-1.053)
Ankylosing spondylitis	Unspecified dementia	10	Weighted mode	0.335222	1.018(0.983-1.054)
Ankylosing spondylitis	Unspecified dementia	10	Simple mode	0.497076	1.017(0.971-1.065)
Ankylosing spondylitis	Vascular dementia	10	Inverse variance weighted	0.976077	1.000(0.968-1.032)
Ankylosing spondylitis	Vascular dementia	10	MR Egger	0.469205	0.981(0.935-1.030)
Ankylosing spondylitis	Vascular dementia	10	Weighted median	0.964205	0.999(0.958-1.041)
Ankylosing spondylitis	Vascular dementia	10	Weighted mode	0.980433	1.001(0.955-1.049)
Ankylosing spondylitis	Vascular dementia	10	Simple mode	0.941849	1.002(0.944-1.064)
Ankylosing spondylitis	Frontotemporal dementia, wide, incl. Pick's disease	10	Inverse variance weighted	0.499194	1.045(0.919-1.188)
Ankylosing spondylitis	Frontotemporal dementia, wide, incl. Pick's disease	10	MR Egger	0.402851	1.093(0.898-1.330)
Ankylosing spondylitis	Frontotemporal dementia, wide, incl. Pick's disease	10	Weighted median	0.446954	1.067(0.902-1.263)
Ankylosing spondylitis	Frontotemporal dementia, wide, incl. Pick's disease	10	Weighted mode	0.599206	1.052(0.876-1.265)
Ankylosing spondylitis	Frontotemporal dementia, wide, incl. Pick's disease	10	Simple mode	0.933553	1.012(0.774-1.322)
Juvenile idiopathic arthritis	Dementia with Lewy bodies	3	Inverse variance weighted	0.756405	0.978(0.849-1.126)
Juvenile idiopathic arthritis	Dementia with Lewy bodies	3	MR Egger	0.80126	1.057(0.753-1.484)
Juvenile idiopathic arthritis	Dementia with Lewy bodies	3	Weighted median	0.936883	0.994(0.854-1.156)
Juvenile idiopathic arthritis	Dementia with Lewy bodies	3	Weighted mode	0.978779	1.002(0.858-1.171)
Juvenile idiopathic arthritis	Dementia with Lewy bodies	3	Simple mode	0.91472	0.988(0.812-1.202)
Juvenile idiopathic arthritis	Dementia in Alzheimer disease	7	Inverse variance weighted	0.720072	1.011(0.954-1.071)
Juvenile idiopathic arthritis	Dementia in Alzheimer disease	7	MR Egger	0.515445	0.957(0.845-1.083)
Juvenile idiopathic arthritis	Dementia in Alzheimer disease	7	Weighted median	0.794952	0.991(0.925-1.062)
Juvenile idiopathic arthritis	Dementia in Alzheimer disease	7	Weighted mode	0.826566	0.991(0.918-1.070)
Juvenile idiopathic arthritis	Dementia in Alzheimer disease	7	Simple mode	0.922223	0.995(0.899-1.101)
Juvenile idiopathic arthritis	Dementia	7	Inverse variance weighted	0.857589	0.996(0.957-1.038)
Juvenile idiopathic arthritis	Dementia	7	MR Egger	0.630228	0.976(0.889-1.071)
Juvenile idiopathic arthritis	Dementia	7	Weighted median	0.459158	1.018(0.971-1.068)
Juvenile idiopathic arthritis	Dementia	7	Weighted mode	0.437134	1.032(0.959-1.110)
Juvenile idiopathic arthritis	Dementia	7	Simple mode	0.378884	1.043(0.956-1.139)
Juvenile idiopathic arthritis	Unspecified dementia	7	Inverse variance weighted	0.584654	1.028(0.932-1.134)
Juvenile idiopathic arthritis	Unspecified dementia	7	MR Egger	0.554017	1.076(0.858-1.348)
Juvenile idiopathic arthritis	Unspecified dementia	7	Weighted median	0.0852807	1.081(0.989-1.180)
Juvenile idiopathic arthritis	Unspecified dementia	7	Weighted mode	0.212782	1.074(0.972-1.187)
Juvenile idiopathic arthritis	Unspecified dementia	7	Simple mode	0.170474	1.118(0.972-1.287)
Juvenile idiopathic arthritis	Vascular dementia	7	Inverse variance weighted	0.653499	1.019(0.939-1.106)
Juvenile idiopathic arthritis	Vascular dementia	7	MR Egger	0.345682	1.098(0.921-1.309)
Juvenile idiopathic arthritis	Vascular dementia	7	Weighted median	0.704662	0.979(0.875-1.095)
Juvenile idiopathic arthritis	Vascular dementia	7	Weighted mode	0.678885	0.963(0.813-1.141)
Juvenile idiopathic arthritis	Vascular dementia	7	Simple mode	0.657616	0.960(0.809-1.139)
Juvenile idiopathic arthritis	Frontotemporal dementia, wide, incl. Pick's disease	7	Inverse variance weighted	0.0124774	0.657(0.472-0.913)
Juvenile idiopathic arthritis	Frontotemporal dementia, wide, incl. Pick's disease	7	MR Egger	0.0706293	0.438(0.216-0.888)
Juvenile idiopathic arthritis	Frontotemporal dementia, wide, incl. Pick's disease	7	Weighted median	0.0152619	0.582(0.376-0.901)
Juvenile idiopathic arthritis	Frontotemporal dementia, wide, incl. Pick's disease	7	Weighted mode	0.0506538	0.543(0.332-0.887)
Juvenile idiopathic arthritis	Frontotemporal dementia, wide, incl. Pick's disease	7	Simple mode	0.0891016	0.554(0.313-0.981)
Gout	Dementia with Lewy bodies	6	Inverse variance weighted	0.419349	1.050(0.932-1.183)
Gout	Dementia with Lewy bodies	6	MR Egger	0.358523	0.852(0.630-1.153)
Gout	Dementia with Lewy bodies	6	Weighted median	0.603137	1.039(0.898-1.203)
Gout	Dementia with Lewy bodies	6	Weighted mode	0.675606	1.036(0.885-1.213)
Gout	Dementia with Lewy bodies	6	Simple mode	0.442078	1.096(0.884-1.359)
Gout	Dementia in Alzheimer disease	7	Inverse variance weighted	0.820093	1.008(0.938-1.084)
Gout	Dementia in Alzheimer disease	7	MR Egger	0.69211	0.969(0.836-1.123)
Gout	Dementia in Alzheimer disease	7	Weighted median	0.855375	0.991(0.901-1.090)
Gout	Dementia in Alzheimer disease	7	Weighted mode	0.759768	0.984(0.892-1.085)
Gout	Dementia in Alzheimer disease	7	Simple mode	0.387007	1.065(0.933-1.215)
Gout	Dementia	7	Inverse variance weighted	0.0140878	0.947(0.907-0.989)
Gout	Dementia	7	MR Egger	0.447469	0.965(0.887-1.050)
Gout	Dementia	7	Weighted median	0.036862	0.946(0.897-0.997)
Gout	Dementia	7	Weighted mode	0.186859	0.957(0.902-1.014)
Gout	Dementia	7	Simple mode	0.25303	0.959(0.899-1.023)
Gout	Unspecified dementia	7	Inverse variance weighted	0.370219	0.961(0.880-1.049)
Gout	Unspecified dementia	7	MR Egger	0.433873	0.926(0.775-1.106)
Gout	Unspecified dementia	7	Weighted median	0.178992	0.930(0.836-1.034)
Gout	Unspecified dementia	7	Weighted mode	0.260743	0.923(0.812-1.048)
Gout	Unspecified dementia	7	Simple mode	0.411757	0.923(0.771-1.103)
Gout	Vascular dementia	7	Inverse variance weighted	0.655294	0.974(0.868-1.093)
Gout	Vascular dementia	7	MR Egger	0.282833	1.127(0.928-1.369)
Gout	Vascular dementia	7	Weighted median	0.968713	0.997(0.874-1.138)
Gout	Vascular dementia	7	Weighted mode	0.896412	1.009(0.886-1.149)
Gout	Vascular dementia	7	Simple mode	0.889973	1.011(0.868-1.179)
Gout	Frontotemporal dementia, wide, incl. Pick's disease	7	Inverse variance weighted	0.474773	0.856(0.560-1.310)
Gout	Frontotemporal dementia, wide, incl. Pick's disease	7	MR Egger	0.828762	1.105(0.467-2.617)
Gout	Frontotemporal dementia, wide, incl. Pick's disease	7	Weighted median	0.707481	0.903(0.529-1.540)
Gout	Frontotemporal dementia, wide, incl. Pick's disease	7	Weighted mode	0.835701	0.934(0.503-1.733)
Gout	Frontotemporal dementia, wide, incl. Pick's disease	7	Simple mode	0.561987	0.797(0.386-1.645)
Osteoporosis	Dementia with Lewy bodies	8	Inverse variance weighted	0.101525	0.910(0.813-1.019)
Osteoporosis	Dementia with Lewy bodies	8	MR Egger	0.963551	0.994(0.784-1.261)
Osteoporosis	Dementia with Lewy bodies	8	Weighted median	0.0698409	0.877(0.760-1.011)
Osteoporosis	Dementia with Lewy bodies	8	Weighted mode	0.247661	0.868(0.697-1.082)
Osteoporosis	Dementia with Lewy bodies	8	Simple mode	0.268415	0.870(0.693-1.092)
Osteoporosis	Dementia in Alzheimer disease	7	Inverse variance weighted	0.707133	1.016(0.934-1.106)
Osteoporosis	Dementia in Alzheimer disease	7	MR Egger	0.784545	0.972(0.800-1.180)
Osteoporosis	Dementia in Alzheimer disease	7	Weighted median	0.897941	1.006(0.915-1.107)
Osteoporosis	Dementia in Alzheimer disease	7	Weighted mode	0.992425	0.999(0.883-1.131)
Osteoporosis	Dementia in Alzheimer disease	7	Simple mode	0.936364	1.005(0.885-1.142)
Osteoporosis	Dementia	7	Inverse variance weighted	0.572107	0.987(0.942-1.034)
Osteoporosis	Dementia	7	MR Egger	0.38069	0.952(0.861-1.052)
Osteoporosis	Dementia	7	Weighted median	0.901482	0.996(0.939-1.057)
Osteoporosis	Dementia	7	Weighted mode	0.90609	1.005(0.926-1.091)
Osteoporosis	Dementia	7	Simple mode	0.885979	1.006(0.926-1.094)
Osteoporosis	Unspecified dementia	7	Inverse variance weighted	0.739034	0.985(0.901-1.077)
Osteoporosis	Unspecified dementia	7	MR Egger	0.123559	0.834(0.689-1.011)
Osteoporosis	Unspecified dementia	7	Weighted median	0.949526	1.004(0.892-1.130)
Osteoporosis	Unspecified dementia	7	Weighted mode	0.449039	0.922(0.758-1.122)
Osteoporosis	Unspecified dementia	7	Simple mode	0.810122	1.027(0.834-1.265)
Osteoporosis	Vascular dementia	7	Inverse variance weighted	0.600014	0.971(0.870-1.084)
Osteoporosis	Vascular dementia	7	MR Egger	0.731057	0.957(0.756-1.212)
Osteoporosis	Vascular dementia	7	Weighted median	0.77992	0.981(0.856-1.124)
Osteoporosis	Vascular dementia	7	Weighted mode	0.90819	0.989(0.822-1.189)
Osteoporosis	Vascular dementia	7	Simple mode	0.442228	0.927(0.775-1.110)
Osteoporosis	Frontotemporal dementia, wide, incl. Pick's disease	7	Inverse variance weighted	0.697793	0.913(0.576-1.447)
Osteoporosis	Frontotemporal dementia, wide, incl. Pick's disease	7	MR Egger	0.069973	0.331(0.129-0.850)
Osteoporosis	Frontotemporal dementia, wide, incl. Pick's disease	7	Weighted median	0.322211	0.748(0.420-1.330)
Osteoporosis	Frontotemporal dementia, wide, incl. Pick's disease	7	Weighted mode	0.317149	0.597(0.237-1.508)
Osteoporosis	Frontotemporal dementia, wide, incl. Pick's disease	7	Simple mode	0.427948	0.634(0.222-1.814)
Osteoporosis with pathological fracture	Dementia with Lewy bodies	7	Inverse variance weighted	0.583905	0.836(0.441-1.586)
Osteoporosis with pathological fracture	Dementia with Lewy bodies	7	MR Egger	0.678295	0.641(0.088-4.645)
Osteoporosis with pathological fracture	Dementia with Lewy bodies	7	Weighted median	0.760145	0.758(0.128-4.487)
Osteoporosis with pathological fracture	Dementia with Lewy bodies	7	Weighted mode	0.492334	0.699(0.268-1.825)
Osteoporosis with pathological fracture	Dementia with Lewy bodies	7	Simple mode	0.341177	0.499(0.133-1.865)
Osteoporosis with pathological fracture	Dementia in Alzheimer disease	6	Inverse variance weighted	0.793917	1.043(0.761-1.429)
Osteoporosis with pathological fracture	Dementia in Alzheimer disease	6	MR Egger	0.747859	0.862(0.370-2.009)
Osteoporosis with pathological fracture	Dementia in Alzheimer disease	6	Weighted median	0.99468	0.989(0.034-29.129)
Osteoporosis with pathological fracture	Dementia in Alzheimer disease	6	Weighted mode	0.926614	0.979(0.632-1.516)
Osteoporosis with pathological fracture	Dementia in Alzheimer disease	6	Simple mode	0.665936	0.877(0.501-1.536)
Osteoporosis with pathological fracture	Dementia	6	Inverse variance weighted	0.960081	0.993(0.759-1.299)
Osteoporosis with pathological fracture	Dementia	6	MR Egger	0.268852	0.646(0.331-1.259)
Osteoporosis with pathological fracture	Dementia	6	Weighted median	0.976396	0.938(0.014-63.859)
Osteoporosis with pathological fracture	Dementia	6	Weighted mode	0.625742	0.927(0.696-1.234)
Osteoporosis with pathological fracture	Dementia	6	Simple mode	0.563394	0.882(0.592-1.314)
Osteoporosis with pathological fracture	Unspecified dementia	6	Inverse variance weighted	0.781881	1.067(0.675-1.685)
Osteoporosis with pathological fracture	Unspecified dementia	6	MR Egger	0.366168	0.543(0.168-1.759)
Osteoporosis with pathological fracture	Unspecified dementia	6	Weighted median	0.969995	0.963(0.134-6.919)
Osteoporosis with pathological fracture	Unspecified dementia	6	Weighted mode	0.884851	0.962(0.580-1.593)
Osteoporosis with pathological fracture	Unspecified dementia	6	Simple mode	0.676499	1.171(0.583-2.351)
Osteoporosis with pathological fracture	Vascular dementia	6	Inverse variance weighted	0.708623	0.919(0.588-1.434)
Osteoporosis with pathological fracture	Vascular dementia	6	MR Egger	0.582285	1.441(0.435-4.773)
Osteoporosis with pathological fracture	Vascular dementia	6	Weighted median	0.964289	1.040(0.190-5.695)
Osteoporosis with pathological fracture	Vascular dementia	6	Weighted mode	0.921717	1.031(0.578-1.838)
Osteoporosis with pathological fracture	Vascular dementia	6	Simple mode	0.901832	1.047(0.522-2.103)
Osteoporosis with pathological fracture	Frontotemporal dementia, wide, incl. Pick's disease	6	Inverse variance weighted	0.164214	0.203(0.021-1.922)
Osteoporosis with pathological fracture	Frontotemporal dementia, wide, incl. Pick's disease	6	MR Egger	0.917185	0.688(0.001-517.538)
Osteoporosis with pathological fracture	Frontotemporal dementia, wide, incl. Pick's disease	6	Weighted median	0.77943	0.488(0.003-73.904)
Osteoporosis with pathological fracture	Frontotemporal dementia, wide, incl. Pick's disease	6	Weighted mode	0.62819	0.466(0.025-8.521)
Osteoporosis with pathological fracture	Frontotemporal dementia, wide, incl. Pick's disease	6	Simple mode	0.765374	0.565(0.016-19.663)
Osteomalacia	Dementia with Lewy bodies	5	Inverse variance weighted	0.750992	0.994(0.956-1.033)
Osteomalacia	Dementia with Lewy bodies	5	MR Egger	0.537889	0.976(0.910-1.046)
Osteomalacia	Dementia with Lewy bodies	5	Weighted median	0.984077	1.000(0.953-1.048)
Osteomalacia	Dementia with Lewy bodies	5	Weighted mode	0.910473	1.004(0.943-1.069)
Osteomalacia	Dementia with Lewy bodies	5	Simple mode	0.90475	1.004(0.943-1.069)
Osteomalacia	Dementia in Alzheimer disease	5	Inverse variance weighted	0.173291	1.020(0.991-1.050)
Osteomalacia	Dementia in Alzheimer disease	5	MR Egger	0.523699	1.025(0.959-1.095)
Osteomalacia	Dementia in Alzheimer disease	5	Weighted median	0.416341	1.015(0.979-1.053)
Osteomalacia	Dementia in Alzheimer disease	5	Weighted mode	0.604829	1.015(0.963-1.070)
Osteomalacia	Dementia in Alzheimer disease	5	Simple mode	0.763372	1.009(0.955-1.066)
Osteomalacia	Dementia	5	Inverse variance weighted	0.978909	1.000(0.985-1.016)
Osteomalacia	Dementia	5	MR Egger	0.948329	1.001(0.969-1.034)
Osteomalacia	Dementia	5	Weighted median	0.915442	1.001(0.981-1.022)
Osteomalacia	Dementia	5	Weighted mode	0.530014	1.011(0.980-1.042)
Osteomalacia	Dementia	5	Simple mode	0.76353	0.995(0.962-1.028)
Osteomalacia	Unspecified dementia	5	Inverse variance weighted	0.948167	0.999(0.969-1.030)
Osteomalacia	Unspecified dementia	5	MR Egger	0.303872	1.038(0.979-1.101)
Osteomalacia	Unspecified dementia	5	Weighted median	0.516778	1.013(0.974-1.053)
Osteomalacia	Unspecified dementia	5	Weighted mode	0.470914	1.022(0.968-1.079)
Osteomalacia	Unspecified dementia	5	Simple mode	0.527244	1.021(0.963-1.082)
Osteomalacia	Vascular dementia	5	Inverse variance weighted	0.393391	0.976(0.923-1.032)
Osteomalacia	Vascular dementia	5	MR Egger	0.525345	0.955(0.844-1.082)
Osteomalacia	Vascular dementia	5	Weighted median	0.0971112	0.959(0.912-1.008)
Osteomalacia	Vascular dementia	5	Weighted mode	0.230129	0.958(0.903-1.017)
Osteomalacia	Vascular dementia	5	Simple mode	0.238624	0.954(0.893-1.020)
Osteomalacia	Frontotemporal dementia, wide, incl. Pick's disease	5	Inverse variance weighted	0.438632	0.943(0.813-1.094)
Osteomalacia	Frontotemporal dementia, wide, incl. Pick's disease	5	MR Egger	0.557983	0.905(0.672-1.219)
Osteomalacia	Frontotemporal dementia, wide, incl. Pick's disease	5	Weighted median	0.873076	1.016(0.837-1.233)
Osteomalacia	Frontotemporal dementia, wide, incl. Pick's disease	5	Weighted mode	0.819563	1.030(0.812-1.307)
Osteomalacia	Frontotemporal dementia, wide, incl. Pick's disease	5	Simple mode	0.813364	1.032(0.808-1.318)
Osteonecrosis	Dementia with Lewy bodies	11	Inverse variance weighted	0.857073	1.005(0.953-1.060)
Osteonecrosis	Dementia with Lewy bodies	11	MR Egger	0.797666	1.019(0.886-1.172)
Osteonecrosis	Dementia with Lewy bodies	11	Weighted median	0.915074	0.996(0.930-1.067)
Osteonecrosis	Dementia with Lewy bodies	11	Weighted mode	0.770407	1.020(0.896-1.161)
Osteonecrosis	Dementia with Lewy bodies	11	Simple mode	0.8489	1.013(0.889-1.154)
Osteonecrosis	Dementia in Alzheimer disease	11	Inverse variance weighted	0.479307	0.988(0.956-1.021)
Osteonecrosis	Dementia in Alzheimer disease	11	MR Egger	0.855217	1.008(0.927-1.096)
Osteonecrosis	Dementia in Alzheimer disease	11	Weighted median	0.87098	1.004(0.961-1.048)
Osteonecrosis	Dementia in Alzheimer disease	11	Weighted mode	0.924171	1.003(0.947-1.062)
Osteonecrosis	Dementia in Alzheimer disease	11	Simple mode	0.857216	1.006(0.940-1.077)
Osteonecrosis	Dementia	11	Inverse variance weighted	0.499694	0.993(0.974-1.013)
Osteonecrosis	Dementia	11	MR Egger	0.653939	1.012(0.963-1.063)
Osteonecrosis	Dementia	11	Weighted median	0.938044	0.999(0.973-1.025)
Osteonecrosis	Dementia	11	Weighted mode	0.982437	1.000(0.968-1.034)
Osteonecrosis	Dementia	11	Simple mode	0.499965	1.013(0.978-1.049)
Osteonecrosis	Unspecified dementia	11	Inverse variance weighted	0.635807	0.989(0.946-1.034)
Osteonecrosis	Unspecified dementia	11	MR Egger	0.354573	1.054(0.949-1.170)
Osteonecrosis	Unspecified dementia	11	Weighted median	0.477386	0.981(0.931-1.034)
Osteonecrosis	Unspecified dementia	11	Weighted mode	0.599472	0.980(0.912-1.054)
Osteonecrosis	Unspecified dementia	11	Simple mode	0.693488	0.983(0.903-1.070)
Osteonecrosis	Vascular dementia	11	Inverse variance weighted	0.742931	0.993(0.950-1.038)
Osteonecrosis	Vascular dementia	11	MR Egger	0.668182	1.025(0.920-1.142)
Osteonecrosis	Vascular dementia	11	Weighted median	0.587001	0.983(0.924-1.046)
Osteonecrosis	Vascular dementia	11	Weighted mode	0.59562	0.976(0.896-1.064)
Osteonecrosis	Vascular dementia	11	Simple mode	0.626096	0.975(0.881-1.078)
Osteonecrosis	Frontotemporal dementia, wide, incl. Pick's disease	11	Inverse variance weighted	0.195307	1.170(0.923-1.484)
Osteonecrosis	Frontotemporal dementia, wide, incl. Pick's disease	11	MR Egger	0.637035	1.165(0.632-2.147)
Osteonecrosis	Frontotemporal dementia, wide, incl. Pick's disease	11	Weighted median	0.322816	1.149(0.872-1.513)
Osteonecrosis	Frontotemporal dementia, wide, incl. Pick's disease	11	Weighted mode	0.712666	1.078(0.730-1.593)
Osteonecrosis	Frontotemporal dementia, wide, incl. Pick's disease	11	Simple mode	0.938882	0.981(0.611-1.576)
Osteomyelitis	Dementia with Lewy bodies	9	Inverse variance weighted	0.428566	1.104(0.864-1.412)
Osteomyelitis	Dementia with Lewy bodies	9	MR Egger	0.679768	1.139(0.630-2.057)
Osteomyelitis	Dementia with Lewy bodies	9	Weighted median	0.85633	1.031(0.744-1.428)
Osteomyelitis	Dementia with Lewy bodies	9	Weighted mode	0.98658	1.004(0.620-1.627)
Osteomyelitis	Dementia with Lewy bodies	9	Simple mode	0.97676	1.007(0.624-1.626)
Osteomyelitis	Dementia in Alzheimer disease	8	Inverse variance weighted	0.758663	0.977(0.839-1.136)
Osteomyelitis	Dementia in Alzheimer disease	8	MR Egger	0.974942	0.995(0.715-1.383)
Osteomyelitis	Dementia in Alzheimer disease	8	Weighted median	0.53807	1.061(0.880-1.279)
Osteomyelitis	Dementia in Alzheimer disease	8	Weighted mode	0.607098	1.061(0.855-1.318)
Osteomyelitis	Dementia in Alzheimer disease	8	Simple mode	0.569473	0.932(0.739-1.175)
Osteomyelitis	Dementia	8	Inverse variance weighted	0.907539	0.994(0.903-1.094)
Osteomyelitis	Dementia	8	MR Egger	0.914006	1.012(0.822-1.245)
Osteomyelitis	Dementia	8	Weighted median	0.506414	1.041(0.924-1.173)
Osteomyelitis	Dementia	8	Weighted mode	0.365902	1.065(0.937-1.210)
Osteomyelitis	Dementia	8	Simple mode	0.529405	1.061(0.890-1.267)
Osteomyelitis	Unspecified dementia	8	Inverse variance weighted	0.932191	1.007(0.855-1.187)
Osteomyelitis	Unspecified dementia	8	MR Egger	0.704404	1.069(0.768-1.488)
Osteomyelitis	Unspecified dementia	8	Weighted median	0.565035	1.065(0.859-1.320)
Osteomyelitis	Unspecified dementia	8	Weighted mode	0.567065	1.078(0.844-1.376)
Osteomyelitis	Unspecified dementia	8	Simple mode	0.770103	1.047(0.778-1.408)
Osteomyelitis	Vascular dementia	8	Inverse variance weighted	0.873067	1.021(0.787-1.325)
Osteomyelitis	Vascular dementia	8	MR Egger	0.69695	1.123(0.643-1.964)
Osteomyelitis	Vascular dementia	8	Weighted median	0.956521	0.991(0.729-1.349)
Osteomyelitis	Vascular dementia	8	Weighted mode	0.893994	0.973(0.663-1.428)
Osteomyelitis	Vascular dementia	8	Simple mode	0.435641	0.819(0.510-1.315)
Osteomyelitis	Frontotemporal dementia, wide, incl. Pick's disease	8	Inverse variance weighted	0.237396	0.615(0.274-1.378)
Osteomyelitis	Frontotemporal dementia, wide, incl. Pick's disease	8	MR Egger	0.13533	0.243(0.049-1.213)
Osteomyelitis	Frontotemporal dementia, wide, incl. Pick's disease	8	Weighted median	0.198847	0.509(0.182-1.426)
Osteomyelitis	Frontotemporal dementia, wide, incl. Pick's disease	8	Weighted mode	0.237475	0.460(0.142-1.494)
Osteomyelitis	Frontotemporal dementia, wide, incl. Pick's disease	8	Simple mode	0.379458	0.523(0.135-2.026)
Meniscus derangement	Dementia with Lewy bodies	38	Inverse variance weighted	0.50181	1.092(0.844-1.414)
Meniscus derangement	Dementia with Lewy bodies	38	MR Egger	0.562858	1.208(0.640-2.281)
Meniscus derangement	Dementia with Lewy bodies	38	Weighted median	0.546674	1.112(0.788-1.569)
Meniscus derangement	Dementia with Lewy bodies	38	Weighted mode	0.536482	1.179(0.703-1.975)
Meniscus derangement	Dementia with Lewy bodies	38	Simple mode	0.401304	1.330(0.689-2.567)
Meniscus derangement	Dementia in Alzheimer disease	46	Inverse variance weighted	0.882696	1.010(0.885-1.153)
Meniscus derangement	Dementia in Alzheimer disease	46	MR Egger	0.690976	1.087(0.723-1.632)
Meniscus derangement	Dementia in Alzheimer disease	46	Weighted median	0.724965	0.966(0.797-1.171)
Meniscus derangement	Dementia in Alzheimer disease	46	Weighted mode	0.922918	0.981(0.666-1.444)
Meniscus derangement	Dementia in Alzheimer disease	46	Simple mode	0.973842	0.993(0.654-1.507)
Meniscus derangement	Dementia	46	Inverse variance weighted	0.520264	1.031(0.940-1.130)
Meniscus derangement	Dementia	46	MR Egger	0.594189	1.081(0.813-1.437)
Meniscus derangement	Dementia	46	Weighted median	0.869646	1.010(0.898-1.136)
Meniscus derangement	Dementia	46	Weighted mode	0.808154	1.030(0.811-1.308)
Meniscus derangement	Dementia	46	Simple mode	0.908122	1.018(0.759-1.365)
Meniscus derangement	Unspecified dementia	46	Inverse variance weighted	0.384968	1.077(0.911-1.272)
Meniscus derangement	Unspecified dementia	46	MR Egger	0.789254	1.073(0.640-1.800)
Meniscus derangement	Unspecified dementia	46	Weighted median	0.194825	1.159(0.927-1.447)
Meniscus derangement	Unspecified dementia	46	Weighted mode	0.0905741	1.536(0.944-2.499)
Meniscus derangement	Unspecified dementia	46	Simple mode	0.0846037	1.587(0.950-2.651)
Meniscus derangement	Vascular dementia	46	Inverse variance weighted	0.842491	1.019(0.845-1.229)
Meniscus derangement	Vascular dementia	46	MR Egger	0.23232	1.425(0.803-2.529)
Meniscus derangement	Vascular dementia	46	Weighted median	0.794951	1.036(0.792-1.356)
Meniscus derangement	Vascular dementia	46	Weighted mode	0.914845	0.966(0.510-1.828)
Meniscus derangement	Vascular dementia	46	Simple mode	0.770019	1.097(0.591-2.039)
Meniscus derangement	Frontotemporal dementia, wide, incl. Pick's disease	46	Inverse variance weighted	0.20471	1.632(0.766-3.478)
Meniscus derangement	Frontotemporal dementia, wide, incl. Pick's disease	46	MR Egger	0.892563	1.175(0.115-11.995)
Meniscus derangement	Frontotemporal dementia, wide, incl. Pick's disease	46	Weighted median	0.228076	1.998(0.648-6.158)
Meniscus derangement	Frontotemporal dementia, wide, incl. Pick's disease	46	Weighted mode	0.722925	1.537(0.145-16.306)
Meniscus derangement	Frontotemporal dementia, wide, incl. Pick's disease	46	Simple mode	0.511456	2.477(0.169-36.347)
Sciatica	Dementia with Lewy bodies	7	Inverse variance weighted	0.15532	1.115(0.960-1.295)
Sciatica	Dementia with Lewy bodies	7	MR Egger	0.601497	1.102(0.783-1.549)
Sciatica	Dementia with Lewy bodies	7	Weighted median	0.284706	1.111(0.916-1.346)
Sciatica	Dementia with Lewy bodies	7	Weighted mode	0.514636	1.097(0.844-1.426)
Sciatica	Dementia with Lewy bodies	7	Simple mode	0.585682	1.092(0.810-1.471)
Sciatica	Dementia in Alzheimer disease	8	Inverse variance weighted	0.86314	1.010(0.905-1.126)
Sciatica	Dementia in Alzheimer disease	8	MR Egger	0.295989	1.133(0.915-1.402)
Sciatica	Dementia in Alzheimer disease	8	Weighted median	0.271727	1.066(0.951-1.196)
Sciatica	Dementia in Alzheimer disease	8	Weighted mode	0.206312	1.098(0.963-1.251)
Sciatica	Dementia in Alzheimer disease	8	Simple mode	0.477051	1.082(0.881-1.328)
Sciatica	Dementia	8	Inverse variance weighted	0.8225	1.008(0.938-1.084)
Sciatica	Dementia	8	MR Egger	0.346248	1.078(0.933-1.246)
Sciatica	Dementia	8	Weighted median	0.212057	1.045(0.975-1.120)
Sciatica	Dementia	8	Weighted mode	0.197615	1.066(0.976-1.165)
Sciatica	Dementia	8	Simple mode	0.244815	1.066(0.966-1.177)
Sciatica	Unspecified dementia	8	Inverse variance weighted	0.524471	0.959(0.842-1.092)
Sciatica	Unspecified dementia	8	MR Egger	0.394769	1.121(0.878-1.433)
Sciatica	Unspecified dementia	8	Weighted median	0.857501	0.988(0.861-1.132)
Sciatica	Unspecified dementia	8	Weighted mode	0.873991	0.986(0.833-1.167)
Sciatica	Unspecified dementia	8	Simple mode	0.823848	0.975(0.784-1.211)
Sciatica	Vascular dementia	8	Inverse variance weighted	0.532057	0.956(0.831-1.100)
Sciatica	Vascular dementia	8	MR Egger	0.882587	0.976(0.718-1.328)
Sciatica	Vascular dementia	8	Weighted median	0.762291	1.024(0.876-1.198)
Sciatica	Vascular dementia	8	Weighted mode	0.851439	1.018(0.850-1.219)
Sciatica	Vascular dementia	8	Simple mode	0.988995	1.002(0.813-1.234)
Sciatica	Frontotemporal dementia, wide, incl. Pick's disease	8	Inverse variance weighted	0.54842	0.838(0.471-1.492)
Sciatica	Frontotemporal dementia, wide, incl. Pick's disease	8	MR Egger	0.292954	0.508(0.161-1.606)
Sciatica	Frontotemporal dementia, wide, incl. Pick's disease	8	Weighted median	0.408711	0.767(0.409-1.439)
Sciatica	Frontotemporal dementia, wide, incl. Pick's disease	8	Weighted mode	0.342544	0.695(0.345-1.401)
Sciatica	Frontotemporal dementia, wide, incl. Pick's disease	8	Simple mode	0.611698	0.786(0.323-1.913)
Lateral epicondylitis	Dementia with Lewy bodies	8	Inverse variance weighted	0.175751	0.874(0.719-1.062)
Lateral epicondylitis	Dementia with Lewy bodies	8	MR Egger	0.999511	1.000(0.650-1.539)
Lateral epicondylitis	Dementia with Lewy bodies	8	Weighted median	0.153487	0.829(0.641-1.072)
Lateral epicondylitis	Dementia with Lewy bodies	8	Weighted mode	0.370697	0.845(0.599-1.193)
Lateral epicondylitis	Dementia with Lewy bodies	8	Simple mode	0.311791	0.794(0.524-1.202)
Lateral epicondylitis	Dementia in Alzheimer disease	10	Inverse variance weighted	0.595781	0.958(0.816-1.124)
Lateral epicondylitis	Dementia in Alzheimer disease	10	MR Egger	0.603364	1.133(0.721-1.779)
Lateral epicondylitis	Dementia in Alzheimer disease	10	Weighted median	0.931845	0.992(0.819-1.201)
Lateral epicondylitis	Dementia in Alzheimer disease	10	Weighted mode	0.382108	1.201(0.813-1.774)
Lateral epicondylitis	Dementia in Alzheimer disease	10	Simple mode	0.373997	1.208(0.813-1.795)
Lateral epicondylitis	Dementia	10	Inverse variance weighted	0.78519	0.986(0.890-1.092)
Lateral epicondylitis	Dementia	10	MR Egger	0.238621	1.184(0.913-1.534)
Lateral epicondylitis	Dementia	10	Weighted median	0.515674	0.966(0.869-1.073)
Lateral epicondylitis	Dementia	10	Weighted mode	0.355655	0.930(0.802-1.077)
Lateral epicondylitis	Dementia	10	Simple mode	0.365538	0.930(0.800-1.080)
Lateral epicondylitis	Unspecified dementia	10	Inverse variance weighted	0.459568	0.935(0.782-1.118)
Lateral epicondylitis	Unspecified dementia	10	MR Egger	0.326677	1.273(0.809-2.003)
Lateral epicondylitis	Unspecified dementia	10	Weighted median	0.858137	0.982(0.804-1.199)
Lateral epicondylitis	Unspecified dementia	10	Weighted mode	0.902509	1.020(0.748-1.392)
Lateral epicondylitis	Unspecified dementia	10	Simple mode	0.906199	1.020(0.738-1.410)
Lateral epicondylitis	Vascular dementia	10	Inverse variance weighted	0.268231	0.878(0.697-1.106)
Lateral epicondylitis	Vascular dementia	10	MR Egger	0.963312	1.016(0.526-1.961)
Lateral epicondylitis	Vascular dementia	10	Weighted median	0.450266	0.907(0.703-1.169)
Lateral epicondylitis	Vascular dementia	10	Weighted mode	0.709364	0.923(0.615-1.386)
Lateral epicondylitis	Vascular dementia	10	Simple mode	0.7317	0.928(0.612-1.406)
Lateral epicondylitis	Frontotemporal dementia, wide, incl. Pick's disease	10	Inverse variance weighted	0.613951	0.814(0.367-1.809)
Lateral epicondylitis	Frontotemporal dementia, wide, incl. Pick's disease	10	MR Egger	0.665456	1.698(0.168-17.158)
Lateral epicondylitis	Frontotemporal dementia, wide, incl. Pick's disease	10	Weighted median	0.626353	0.780(0.287-2.120)
Lateral epicondylitis	Frontotemporal dementia, wide, incl. Pick's disease	10	Weighted mode	0.842576	0.840(0.157-4.492)
Lateral epicondylitis	Frontotemporal dementia, wide, incl. Pick's disease	10	Simple mode	0.859062	0.850(0.150-4.834)
Cervical disc disorders	Dementia with Lewy bodies	4	Inverse variance weighted	0.541339	0.867(0.547-1.372)
Cervical disc disorders	Dementia with Lewy bodies	4	MR Egger	0.395143	5.928(0.230-152.484)
Cervical disc disorders	Dementia with Lewy bodies	4	Weighted median	0.953015	1.017(0.576-1.798)
Cervical disc disorders	Dementia with Lewy bodies	4	Weighted mode	0.839061	1.084(0.532-2.205)
Cervical disc disorders	Dementia with Lewy bodies	4	Simple mode	0.873337	1.072(0.487-2.363)
Cervical disc disorders	Dementia in Alzheimer disease	4	Inverse variance weighted	0.901914	1.019(0.760-1.365)
Cervical disc disorders	Dementia in Alzheimer disease	4	MR Egger	0.420725	2.908(0.363-23.310)
Cervical disc disorders	Dementia in Alzheimer disease	4	Weighted median	0.526627	1.116(0.794-1.570)
Cervical disc disorders	Dementia in Alzheimer disease	4	Weighted mode	0.567274	1.155(0.743-1.796)
Cervical disc disorders	Dementia in Alzheimer disease	4	Simple mode	0.602878	1.153(0.712-1.868)
Cervical disc disorders	Dementia	4	Inverse variance weighted	0.428264	0.932(0.782-1.110)
Cervical disc disorders	Dementia	4	MR Egger	0.58402	1.508(0.435-5.231)
Cervical disc disorders	Dementia	4	Weighted median	0.95168	0.994(0.806-1.225)
Cervical disc disorders	Dementia	4	Weighted mode	0.992727	1.001(0.760-1.319)
Cervical disc disorders	Dementia	4	Simple mode	0.993216	1.001(0.745-1.345)
Cervical disc disorders	Unspecified dementia	4	Inverse variance weighted	0.910891	0.972(0.590-1.602)
Cervical disc disorders	Unspecified dementia	4	MR Egger	0.856206	1.569(0.021-115.004)
Cervical disc disorders	Unspecified dementia	4	Weighted median	0.989434	1.003(0.658-1.529)
Cervical disc disorders	Unspecified dementia	4	Weighted mode	0.495482	1.418(0.585-3.434)
Cervical disc disorders	Unspecified dementia	4	Simple mode	0.48827	1.427(0.589-3.452)
Cervical disc disorders	Vascular dementia	4	Inverse variance weighted	0.512241	0.862(0.552-1.345)
Cervical disc disorders	Vascular dementia	4	MR Egger	0.240344	11.935(0.630-226.152)
Cervical disc disorders	Vascular dementia	4	Weighted median	0.775396	0.934(0.585-1.492)
Cervical disc disorders	Vascular dementia	4	Weighted mode	0.721377	1.168(0.538-2.534)
Cervical disc disorders	Vascular dementia	4	Simple mode	0.767927	1.142(0.510-2.559)
Cervical disc disorders	Frontotemporal dementia, wide, incl. Pick's disease	4	Inverse variance weighted	0.339105	3.137(0.301-32.689)
Cervical disc disorders	Frontotemporal dementia, wide, incl. Pick's disease	4	MR Egger	0.515602	0.001(0.000-28780.863)
Cervical disc disorders	Frontotemporal dementia, wide, incl. Pick's disease	4	Weighted median	0.0534981	8.029(0.969-66.514)
Cervical disc disorders	Frontotemporal dementia, wide, incl. Pick's disease	4	Weighted mode	0.240526	9.262(0.466-184.050)
Cervical disc disorders	Frontotemporal dementia, wide, incl. Pick's disease	4	Simple mode	0.24863	8.987(0.441-183.050)
Muscle wasting and atrophy	Dementia with Lewy bodies	2	Inverse variance weighted	0.112544	0.914 (0.819 -1.021 )
Muscle wasting and atrophy	Dementia in Alzheimer disease	4	Inverse variance weighted	0.571962	1.017 (0.960 -1.077 )
Muscle wasting and atrophy	Dementia in Alzheimer disease	4	MR Egger	0.539291	1.094 (0.860 -1.392 )
Muscle wasting and atrophy	Dementia in Alzheimer disease	4	Weighted median	0.255189	1.042 (0.971 -1.118 )
Muscle wasting and atrophy	Dementia in Alzheimer disease	4	Weighted mode	0.425986	1.057 (0.940 -1.188 )
Muscle wasting and atrophy	Dementia in Alzheimer disease	4	Simple mode	0.419608	1.054 (0.943 -1.178 )
Muscle wasting and atrophy	Dementia	4	Inverse variance weighted	0.445476	1.015 (0.977 -1.055 )
Muscle wasting and atrophy	Dementia	4	MR Egger	0.743087	0.969 (0.820 -1.144 )
Muscle wasting and atrophy	Dementia	4	Weighted median	0.249369	1.025 (0.983 -1.069 )
Muscle wasting and atrophy	Dementia	4	Weighted mode	0.30073	1.035 (0.980 -1.093 )
Muscle wasting and atrophy	Dementia	4	Simple mode	0.322831	1.038 (0.976 -1.104 )
Muscle wasting and atrophy	Unspecified dementia	4	Inverse variance weighted	0.831164	1.007 (0.942 -1.077 )
Muscle wasting and atrophy	Unspecified dementia	4	MR Egger	0.673292	0.939 (0.728 -1.210 )
Muscle wasting and atrophy	Unspecified dementia	4	Weighted median	0.780307	1.012 (0.931 -1.100 )
Muscle wasting and atrophy	Unspecified dementia	4	Weighted mode	0.755122	1.019 (0.917 -1.132 )
Muscle wasting and atrophy	Unspecified dementia	4	Simple mode	0.753187	1.019 (0.914 -1.136 )
Muscle wasting and atrophy	Vascular dementia	4	Inverse variance weighted	0.164829	0.944 (0.869 -1.024 )
Muscle wasting and atrophy	Vascular dementia	4	MR Egger	0.195343	0.740 (0.545 -1.007 )
Muscle wasting and atrophy	Vascular dementia	4	Weighted median	0.685137	0.979 (0.882 -1.086 )
Muscle wasting and atrophy	Vascular dementia	4	Weighted mode	0.774409	0.982 (0.876 -1.101 )
Muscle wasting and atrophy	Vascular dementia	4	Simple mode	0.761208	0.978 (0.859 -1.114 )
Muscle wasting and atrophy	Frontotemporal dementia, wide, incl. Pick's disease	4	Inverse variance weighted	0.851264	1.045 (0.657 -1.664 )
Muscle wasting and atrophy	Frontotemporal dementia, wide, incl. Pick's disease	4	MR Egger	0.406243	0.392 (0.068 -2.274 )
Muscle wasting and atrophy	Frontotemporal dementia, wide, incl. Pick's disease	4	Weighted median	0.67288	0.906 (0.572 -1.433 )
Muscle wasting and atrophy	Frontotemporal dementia, wide, incl. Pick's disease	4	Weighted mode	0.580897	0.822 (0.442 -1.531 )
Muscle wasting and atrophy	Frontotemporal dementia, wide, incl. Pick's disease	4	Simple mode	0.479665	0.766 (0.400 -1.467 )
Hand grip strength (right) || id:ukb-b-10215	Dementia with Lewy bodies	138	Inverse variance weighted	0.444348	1.295 (0.667 -2.515 )
Hand grip strength (right) || id:ukb-b-10215	Dementia with Lewy bodies	138	MR Egger	0.34558	3.209 (0.287 -35.895 )
Hand grip strength (right) || id:ukb-b-10215	Dementia with Lewy bodies	138	Weighted median	0.493304	1.399 (0.535 -3.657 )
Hand grip strength (right) || id:ukb-b-10215	Dementia with Lewy bodies	138	Weighted mode	0.0215022	26.831 (1.677 -429.175 )
Hand grip strength (right) || id:ukb-b-10215	Dementia with Lewy bodies	138	Simple mode	0.19864	0.091 (0.002 -3.455 )
Hand grip strength (right) || id:ukb-b-10215	Dementia in Alzheimer disease	154	Inverse variance weighted	0.643582	0.905 (0.594 -1.380 )
Hand grip strength (right) || id:ukb-b-10215	Dementia in Alzheimer disease	154	MR Egger	0.0077249	0.124 (0.027 -0.565 )
Hand grip strength (right) || id:ukb-b-10215	Dementia in Alzheimer disease	154	Weighted median	0.461191	0.804 (0.451 -1.435 )
Hand grip strength (right) || id:ukb-b-10215	Dementia in Alzheimer disease	154	Weighted mode	0.881009	0.912 (0.274 -3.034 )
Hand grip strength (right) || id:ukb-b-10215	Dementia in Alzheimer disease	154	Simple mode	0.904935	0.912 (0.202 -4.114 )
Hand grip strength (right) || id:ukb-b-10215	Dementia	158	Inverse variance weighted	0.780511	0.966 (0.756 -1.234 )
Hand grip strength (right) || id:ukb-b-10215	Dementia	158	MR Egger	0.127017	0.495 (0.202 -1.215 )
Hand grip strength (right) || id:ukb-b-10215	Dementia	158	Weighted median	0.930573	1.015 (0.727 -1.417 )
Hand grip strength (right) || id:ukb-b-10215	Dementia	158	Weighted mode	0.753016	1.134 (0.518 -2.484 )
Hand grip strength (right) || id:ukb-b-10215	Dementia	158	Simple mode	0.990312	0.994 (0.388 -2.547 )
Hand grip strength (right) || id:ukb-b-10215	Unspecified dementia	158	Inverse variance weighted	0.905531	0.973 (0.618 -1.531 )
Hand grip strength (right) || id:ukb-b-10215	Unspecified dementia	158	MR Egger	0.167599	0.307 (0.058 -1.631 )
Hand grip strength (right) || id:ukb-b-10215	Unspecified dementia	158	Weighted median	0.70642	0.891 (0.487 -1.628 )
Hand grip strength (right) || id:ukb-b-10215	Unspecified dementia	158	Weighted mode	0.79166	0.825 (0.198 -3.432 )
Hand grip strength (right) || id:ukb-b-10215	Unspecified dementia	158	Simple mode	0.818073	1.212 (0.236 -6.241 )
Hand grip strength (right) || id:ukb-b-10215	Vascular dementia	158	Inverse variance weighted	0.945458	1.015 (0.654 -1.576 )
Hand grip strength (right) || id:ukb-b-10215	Vascular dementia	158	MR Egger	0.0843608	0.241 (0.048 -1.201 )
Hand grip strength (right) || id:ukb-b-10215	Vascular dementia	158	Weighted median	0.70838	0.891 (0.486 -1.633 )
Hand grip strength (right) || id:ukb-b-10215	Vascular dementia	158	Weighted mode	0.745661	0.801 (0.209 -3.063 )
Hand grip strength (right) || id:ukb-b-10215	Vascular dementia	158	Simple mode	0.840987	1.191 (0.217 -6.531 )
Hand grip strength (right) || id:ukb-b-10215	Frontotemporal dementia, wide, incl. Pick's disease	160	Inverse variance weighted	0.260821	0.317 (0.043 -2.347 )
Hand grip strength (right) || id:ukb-b-10215	Frontotemporal dementia, wide, incl. Pick's disease	160	MR Egger	0.955714	0.810 (0.000 -1336.505 )
Hand grip strength (right) || id:ukb-b-10215	Frontotemporal dementia, wide, incl. Pick's disease	160	Weighted median	0.479891	0.349 (0.019 -6.477 )
Hand grip strength (right) || id:ukb-b-10215	Frontotemporal dementia, wide, incl. Pick's disease	160	Weighted mode	0.926788	0.726 (0.001 -665.838 )
Hand grip strength (right) || id:ukb-b-10215	Frontotemporal dementia, wide, incl. Pick's disease	160	Simple mode	0.674511	5.515 (0.002 -15700.029 )
Hand grip strength (left) || id:ukb-b-7478	Dementia with Lewy bodies	134	Inverse variance weighted	0.668583	1.158 (0.592 -2.266 )
Hand grip strength (left) || id:ukb-b-7478	Dementia with Lewy bodies	134	MR Egger	0.0308659	17.499 (1.338 -228.806 )
Hand grip strength (left) || id:ukb-b-7478	Dementia with Lewy bodies	134	Weighted median	0.865855	1.085 (0.421 -2.798 )
Hand grip strength (left) || id:ukb-b-7478	Dementia with Lewy bodies	134	Weighted mode	0.0521571	14.063 (0.999 -197.917 )
Hand grip strength (left) || id:ukb-b-7478	Dementia with Lewy bodies	134	Simple mode	0.656585	0.500 (0.024 -10.576 )
Hand grip strength (left) || id:ukb-b-7478	Dementia in Alzheimer disease	135	Inverse variance weighted	0.216801	0.771 (0.510 -1.165 )
Hand grip strength (left) || id:ukb-b-7478	Dementia in Alzheimer disease	135	MR Egger	0.0122841	0.139 (0.030 -0.637 )
Hand grip strength (left) || id:ukb-b-7478	Dementia in Alzheimer disease	135	Weighted median	0.381229	0.777 (0.441 -1.367 )
Hand grip strength (left) || id:ukb-b-7478	Dementia in Alzheimer disease	135	Weighted mode	0.930922	0.944 (0.257 -3.472 )
Hand grip strength (left) || id:ukb-b-7478	Dementia in Alzheimer disease	135	Simple mode	0.73315	1.318 (0.271 -6.409 )
Hand grip strength (left) || id:ukb-b-7478	Dementia	136	Inverse variance weighted	0.430484	0.900 (0.691 -1.170 )
Hand grip strength (left) || id:ukb-b-7478	Dementia	136	MR Egger	0.0181035	0.306 (0.116 -0.807 )
Hand grip strength (left) || id:ukb-b-7478	Dementia	136	Weighted median	0.913476	0.981 (0.689 -1.396 )
Hand grip strength (left) || id:ukb-b-7478	Dementia	136	Weighted mode	0.218859	1.751 (0.720 -4.258 )
Hand grip strength (left) || id:ukb-b-7478	Dementia	136	Simple mode	0.209102	1.930 (0.695 -5.362 )
Hand grip strength (left) || id:ukb-b-7478	Unspecified dementia	138	Inverse variance weighted	0.724232	0.919 (0.576 -1.467 )
Hand grip strength (left) || id:ukb-b-7478	Unspecified dementia	138	MR Egger	0.0831037	0.211 (0.037 -1.210 )
Hand grip strength (left) || id:ukb-b-7478	Unspecified dementia	138	Weighted median	0.581421	0.827 (0.421 -1.625 )
Hand grip strength (left) || id:ukb-b-7478	Unspecified dementia	138	Weighted mode	0.584618	0.622 (0.114 -3.403 )
Hand grip strength (left) || id:ukb-b-7478	Unspecified dementia	138	Simple mode	0.775254	0.762 (0.118 -4.918 )
Hand grip strength (left) || id:ukb-b-7478	Vascular dementia	138	Inverse variance weighted	0.71376	0.899 (0.511 -1.584 )
Hand grip strength (left) || id:ukb-b-7478	Vascular dementia	138	MR Egger	0.948247	0.932 (0.110 -7.895 )
Hand grip strength (left) || id:ukb-b-7478	Vascular dementia	138	Weighted median	0.813124	1.101 (0.496 -2.441 )
Hand grip strength (left) || id:ukb-b-7478	Vascular dementia	138	Weighted mode	0.696953	1.404 (0.256 -7.707 )
Hand grip strength (left) || id:ukb-b-7478	Vascular dementia	138	Simple mode	0.61867	1.675 (0.221 -12.710 )
Hand grip strength (left) || id:ukb-b-7478	Frontotemporal dementia, wide, incl. Pick's disease	138	Inverse variance weighted	0.567597	0.519 (0.055 -4.910 )
Hand grip strength (left) || id:ukb-b-7478	Frontotemporal dementia, wide, incl. Pick's disease	138	MR Egger	0.350514	0.018 (0.000 -82.871 )
Hand grip strength (left) || id:ukb-b-7478	Frontotemporal dementia, wide, incl. Pick's disease	138	Weighted median	0.414477	0.265 (0.011 -6.446 )
Hand grip strength (left) || id:ukb-b-7478	Frontotemporal dementia, wide, incl. Pick's disease	138	Weighted mode	0.727614	0.276 (0.000 -381.039 )
Hand grip strength (left) || id:ukb-b-7478	Frontotemporal dementia, wide, incl. Pick's disease	138	Simple mode	0.258174	136.557 (0.028 -662668.166 )
Usual walking pace	Dementia with Lewy bodies	19	Inverse variance weighted	0.607914	0.586 (0.076 -4.510 )
Usual walking pace	Dementia with Lewy bodies	19	MR Egger	0.769959	0.276 (0.000 -1335.252 )
Usual walking pace	Dementia with Lewy bodies	19	Weighted median	0.590813	0.497 (0.039 -6.374 )
Usual walking pace	Dementia with Lewy bodies	19	Weighted mode	0.387611	0.148 (0.002 -10.135 )
Usual walking pace	Dementia with Lewy bodies	19	Simple mode	0.401916	0.158 (0.002 -10.634 )
Usual walking pace	Dementia in Alzheimer disease	49	Inverse variance weighted	0.280803	0.639 (0.284 -1.441 )
Usual walking pace	Dementia in Alzheimer disease	49	MR Egger	0.145704	12.879 (0.436 -380.490 )
Usual walking pace	Dementia in Alzheimer disease	49	Weighted median	0.36295	0.585 (0.184 -1.857 )
Usual walking pace	Dementia in Alzheimer disease	49	Weighted mode	0.90018	0.860 (0.083 -8.909 )
Usual walking pace	Dementia in Alzheimer disease	49	Simple mode	0.854101	0.785 (0.060 -10.230 )
Usual walking pace	Dementia	45	Inverse variance weighted	0.941251	0.978 (0.536 -1.782 )
Usual walking pace	Dementia	45	MR Egger	0.474727	2.501 (0.207 -30.239 )
Usual walking pace	Dementia	45	Weighted median	0.916277	0.960 (0.446 -2.063 )
Usual walking pace	Dementia	45	Weighted mode	0.884158	1.124 (0.234 -5.397 )
Usual walking pace	Dementia	45	Simple mode	0.887973	0.878 (0.145 -5.309 )
Usual walking pace	Unspecified dementia	47	Inverse variance weighted	0.898589	1.068 (0.388 -2.940 )
Usual walking pace	Unspecified dementia	47	MR Egger	0.681037	2.397 (0.038 -151.034 )
Usual walking pace	Unspecified dementia	47	Weighted median	0.648515	1.369 (0.355 -5.276 )
Usual walking pace	Unspecified dementia	47	Weighted mode	0.641343	0.498 (0.027 -9.202 )
Usual walking pace	Unspecified dementia	47	Simple mode	0.679717	0.539 (0.029 -9.992 )
Usual walking pace	Vascular dementia	49	Inverse variance weighted	0.503249	1.485 (0.467 -4.727 )
Usual walking pace	Vascular dementia	49	MR Egger	0.0135049	538.381 (4.423 -65531.184 )
Usual walking pace	Vascular dementia	49	Weighted median	0.813358	1.219 (0.236 -6.291 )
Usual walking pace	Vascular dementia	49	Weighted mode	0.587738	0.345 (0.008 -15.783 )
Usual walking pace	Vascular dementia	49	Simple mode	0.468223	0.256 (0.007 -9.885 )
Usual walking pace	Frontotemporal dementia, wide, incl. Pick's disease	49	Inverse variance weighted	0.259233	14.527 (0.139 -1517.588 )
Usual walking pace	Frontotemporal dementia, wide, incl. Pick's disease	49	MR Egger	0.884329	4.244 (0.000 -1095143242.549 )
Usual walking pace	Frontotemporal dementia, wide, incl. Pick's disease	49	Weighted median	0.488322	10.367 (0.014 -7731.697 )
Usual walking pace	Frontotemporal dementia, wide, incl. Pick's disease	49	Weighted mode	0.974834	0.803 (0.000 -618884.087 )
Usual walking pace	Frontotemporal dementia, wide, incl. Pick's disease	49	Simple mode	0.703107	16.491 (0.000 -27524720.054 )
Physical activity	Dementia with Lewy bodies	33	Inverse variance weighted	0.945119	1.002 (0.937 -1.073 )
Physical activity	Dementia with Lewy bodies	33	MR Egger	0.788533	0.963 (0.733 -1.265 )
Physical activity	Dementia with Lewy bodies	33	Weighted median	0.928076	1.004 (0.915 -1.103 )
Physical activity	Dementia with Lewy bodies	33	Weighted mode	0.296627	0.901 (0.743 -1.092 )
Physical activity	Dementia with Lewy bodies	33	Simple mode	0.290166	0.899 (0.741 -1.091 )
Physical activity	Dementia in Alzheimer disease	38	Inverse variance weighted	0.990734	1.000 (0.961 -1.040 )
Physical activity	Dementia in Alzheimer disease	38	MR Egger	0.183921	0.890 (0.752 -1.053 )
Physical activity	Dementia in Alzheimer disease	38	Weighted median	0.756881	0.991 (0.934 -1.051 )
Physical activity	Dementia in Alzheimer disease	38	Weighted mode	0.760041	0.981 (0.867 -1.110 )
Physical activity	Dementia in Alzheimer disease	38	Simple mode	0.769696	0.981 (0.862 -1.116 )
Physical activity	Dementia	40	Inverse variance weighted	0.814078	1.003 (0.978 -1.029 )
Physical activity	Dementia	40	MR Egger	0.688823	1.023 (0.917 -1.141 )
Physical activity	Dementia	40	Weighted median	0.869065	1.003 (0.970 -1.037 )
Physical activity	Dementia	40	Weighted mode	0.921903	1.004 (0.935 -1.077 )
Physical activity	Dementia	40	Simple mode	0.971376	1.001 (0.930 -1.078 )
Physical activity	Unspecified dementia	41	Inverse variance weighted	0.532399	1.014 (0.971 -1.059 )
Physical activity	Unspecified dementia	41	MR Egger	0.392881	0.921 (0.764 -1.110 )
Physical activity	Unspecified dementia	41	Weighted median	0.920171	0.997 (0.938 -1.060 )
Physical activity	Unspecified dementia	41	Weighted mode	0.963521	0.997 (0.885 -1.124 )
Physical activity	Unspecified dementia	41	Simple mode	0.987807	0.999 (0.885 -1.128 )
Physical activity	Vascular dementia	41	Inverse variance weighted	0.476261	0.980 (0.927 -1.036 )
Physical activity	Vascular dementia	41	MR Egger	0.698607	0.953 (0.748 -1.214 )
Physical activity	Vascular dementia	41	Weighted median	0.896563	1.005 (0.935 -1.080 )
Physical activity	Vascular dementia	41	Weighted mode	0.670836	1.035 (0.885 -1.210 )
Physical activity	Vascular dementia	41	Simple mode	0.656086	1.040 (0.876 -1.235 )
Physical activity	Frontotemporal dementia, wide, incl. Pick's disease	41	Inverse variance weighted	0.791101	1.030 (0.829 -1.279 )
Physical activity	Frontotemporal dementia, wide, incl. Pick's disease	41	MR Egger	0.174415	1.924 (0.761 -4.865 )
Physical activity	Frontotemporal dementia, wide, incl. Pick's disease	41	Weighted median	0.693566	1.063 (0.783 -1.443 )
Physical activity	Frontotemporal dementia, wide, incl. Pick's disease	41	Weighted mode	0.786447	1.089 (0.591 -2.006 )
Physical activity	Frontotemporal dementia, wide, incl. Pick's disease	41	Simple mode	0.665747	1.154 (0.605 -2.204 )
